# Supplementary material for: Identification of the Schistosoma mansoni TNF-Alpha Receptor Gene and the Effect of Human TNF-Alpha on the Parasite Gene Expression Profile
Source: PLoS Negl Trop Dis. 2009 Dec 1;3(12):e556. doi: 10.1371/journal.pntd.0000556 (PMC2779652; doi:10.1371/journal.pntd.0000556)
Supplement: Table S1 — Part A, primers used in real time RT-PCR, cloning experiments and RACE experiments; Part B, oligoarray probe numbers, the corresponding ESTs contig represented by each probe, the predicted protein Smp_xxxxxx number when available, and the putative human homolog (E-value <1e-20) accession number when available. (18.58 MB XLS) [file pntd.0000556.s003.xls]

## Sheet: Table S1 part A
Table S1, part A
Primers used in Real Time RT-PCR, cloning experiments and RACE experiments
Experiments	Primer	Sequence	OBS
5´RACE	RACE 5-1	TTTACATGGTCGGCATTGTG	represented as arrow 1 in figure 1
	RACE 5-2	TTGCCAGGTTCACATTTACG	represented as arrow 2 in figure 2
Cloning of 5´ End	5´end FW1	AAGACATTAACACAACCATTTGGAACTACTTAC	represented as arrow 7 in figure 1
	5´end FW2	GATTTGTAATTTCTACGTGGAACTGGACTAAC	represented as arrow 6 in figure 1
	5´end FW3	TTATCAGTTTGTTCATTCATTTGATGCACACAC	represented as arrow 5 in figure 1
	5´end RV1	GCTACTGTTTCATTGTTCTCATTGCTACTG	represented as arrow 4 in figure 1
	5´end RV2	CAGTTTGTATTTCCACAATATACACCAGTTC	represented as arrow 3 in figure 1
Cloning of central portion of gene	TNF-ext-fw	GGATCCACTCATATTCCAAAGTGAAAC	represented as arrow 8 in figure 1
	TNF-int-rv	CTCGAGAGCAGTTGTTTGAGCTTCCATAG	represented as arrow 9 in figure 1
3´ RACE	RACE 3´GSP1	GACAATAATAACAAATCCAATCAAATGTTGC	represented as arrow 10 in figure 1
	RACE 3´GSP2	CCATCATGGGTTTAATAATTATTTCATTATTATG	represented as arrow 11 in figure 1
	RACE 3´GSP2b	GATAATAATCAT TTACAACAT CGAAGAATTTC	represented as arrow 12 in figure 1
Real time RT-PCR	TNFr-RT_PCR fw	AATTTATTGTTCCATCATGGGTTAAT	used in figure 2 experiment
	TNFr-RT_PCR rv	TCTCTTTGTCGCCATAATTTGTATACA	used in figure 2 experiment
	Tubulin fw	CCATTTATGATATTTGTCGACGGA	used in figure 2 experiment
	Tubulin rv	TTTGTGTAGGTTGGACGCTCTATATCTA	used in figure 2 experiment
																						0

## Sheet: Table S1 part B
Table S1 part B
Oligoarray probe numbers, the corresponding ESTs contig represented by each probe, the predicted protein Smp_xxxxxx number when available, and the putative human homolog Accesion number (E-value < 1e-20) when available.
*Deleted probes were not used for gene expression analysis because they did not pass the probe design quality controls (see Verjovski-Almeida et al., Exp Parasitol 117: 236-245, 2007.)
Feature Number	Row	Col	ProbeName	Deleted*	ESTs Contig	Annotation from Blast against GenBank on Jan 2008	Probe Sequence	Control Type	CONTIG with match to Smp prediction	Probe has match to this Smp_Prediction (Smp_xxx = Genome project prediction) WARNING! Some of the probes are NOT for the predicted gene, but rather they are for the opposite strand of the prediction (see *Strand* info, column P)	Note on probe match	*fractional match of probe to prediction	probe vs. contig strand	contig vs. prediction strand	Strand match of probe with respect to prediction	Smp prediction accession_number	Smp prediction annotation	E-value Schisto Smp vs. Human protein putative homolog	Putative human protein homolog accession_number	Putative human homolog annotation	OLIGOS = other oligo probes matching the same prediction ON EITHER STRAND (see WARNING!!!)
43767	515	77	Q2_P17882	NO	C800001.1	SJCHGC05323 protein [Schistosoma japonicum] ||SEC6-like 1 [Xenopus tropicalis] gb|AAH75108.1| SEC6-like 1 [Xenopus tropicalis] ||hypothetical protein [Gallus gallus] ref|NP_001006384.1| SEC6-like 1 [Gallus gallus] ||CG5341-PA [Drosophila melanogaster] ref|NP_611351.1| CG5341-PA [Drosophila melanogaster] gb|AAL13778.1| LD24661p [Drosophila melanogaster] sp|Q9V8K2|SEC6_DROME Exocyst complex compone…	CCAGATGGACGACCGAAACAATGGAAAAAACTGTTATTCGACAGTATATTTAATGCTATA	0	C800001.1	Smp_028620			Plus / Plus	Plus / Plus	Sense	CAZ30536.1	exocyst complex component sec6, 5' fragment [Schistosoma mansoni]	5e-23	NP_009208	>gi|31083351|ref|NP_009208.2| Sec6 protein [Homo sapiens]	Q2_P17882,Q2_P15638
1904	23	34	Q2_P17883	NO	C800002.1	SJCHGC04237 protein [Schistosoma japonicum] ||DAD-1-like protein [Schistosoma japonicum] ||CG13393-PA [Drosophila melanogaster] gb|AAM29434.1| RE23864p [Drosophila melanogaster] ref|NP_609222.1| CG13393-PA [Drosophila melanogaster] sp|Q9VLM5|DAD1_DROME Defender against cell death 1 (DAD-1) ||defender against cell death 1 [Ixodes scapularis] ||defender against apoptotic cell death 1 [Araneus ventr…	GCCCTTATCACTCGACTAAAAGATCAATTGCAAAAGTTGAGACAAAACCAAATTCAGATT	0	C800002.1	Smp_066610.1			Plus / Plus	Plus / Plus	Sense	CAZ34129.1	expressed protein [Schistosoma mansoni]				Q2_P17883
30531	360	16	Q2_P00006	NO	C800003.1	GA19644-PA [Drosophila pseudoobscura] ||ENSANGP00000012923 [Anopheles gambiae str. PEST] ref|XP_307419.2| ENSANGP00000012923 [Anopheles gambiae str. PEST] ||E(z) ||CG6502-PA [Drosophila melanogaster] ref|NP_524021.2| CG6502-PA [Drosophila melanogaster] gb|AAK93209.1| LD30505p [Drosophila melanogaster] sp|P42124|EZ_DROME Polycomb protein E(z) (Enhancer of zeste protein) ||PREDICTED: similar to Ezh…	GACAGAATTAGCTAATTTACCATATATGGGTGATGATCAAGCTCAAGAAGATGTGAACTT	0	C800003.1	Smp_078900			Plus / Minus	Plus / Minus	Sense	CAZ35257.1	enhancer of zeste, ezh, putative [Schistosoma mansoni]	1e-100	NP_001982	>gi|19923202|ref|NP_001982.2| enhancer of zeste homolog 1 [Homo sapiens]	Q2_P00006,Q2_P01235,Q2_P13546,Q2_P33401,Q2_P19995
32182	379	52	Q2_P17884	NO	C800004.1	PREDICTED: similar to ENSANGP00000007211 [Apis mellifera] ||ENSANGP00000026757 [Anopheles gambiae str. PEST] ref|XP_555564.1| ENSANGP00000026757 [Anopheles gambiae str. PEST] ||hypothetical protein [Gallus gallus] ref|NP_001026017.1| hypothetical protein LOC419128 [Gallus gallus] ||KIAA1219 protein [Homo sapiens] ||RP5-1100H13.1 [Homo sapiens] emb|CAI19169.1| RP5-1100H13.1 [Homo sapiens] ||	GATAAAGTCGGCAGTGAACTTGGAAGTAATGTTAGACAAGAAATTAATGCATTCAAGACA	0	C800004.1	Smp_134670.2			Plus / Plus	Plus / Plus	Sense	CAZ29994.1	expressed protein [Schistosoma mansoni]	9.2e-29	NP_065069	>gi|34787409|ref|NP_065069.1| hypothetical protein LOC57148 [Homo sapiens]	Q2_P34016,Q2_P14141,Q2_P17884,Q2_P01822,Q2_P20744,Q2_P18690,Q2_P23946,Q2_P13124,Q2_P32973,Q2_P29902,Q2_P10138,Q2_P04445,Q2_P00343
42177	497	17	Q2_P17885	NO	C800005.1	none	GTTGCTGATGGTGTATTTCTGTTTGATAAGGTTATTCATCTTACTGTTGATCGCTATATG	0	C800005.1	Smp_162940			Plus / Plus	Plus / Plus	Sense	CAZ34978.1	amine oxidase, putative [Schistosoma mansoni]				Q2_P00429,Q2_P17885,Q2_P22353,Q2_P09010,Q2_P03105,Q2_P01436
20687	244	32	Q2_P17886	NO	C800006.1	Hypothetical protein C08B6.7 [Caenorhabditis elegans] ref|NP_505605.1| C08B6.7 [Caenorhabditis elegans] ||PREDICTED: similar to WD repeat domain 20 isoform 1 [Apis mellifera] ||unnamed protein product [Tetraodon nigroviridis] ||CG6420-PA [Drosophila melanogaster] ref|NP_651499.2| CG6420-PA [Drosophila melanogaster] gb|AAL89974.1| AT02583p [Drosophila melanogaster] gb|AAX33413.1| RE50270p [Drosoph…	TCCCATACCTTCATCTGGTCCTTCGTCGAACGGGGCAAACAGTAGCGGATCCGATAAATC	0	C800006.1	Smp_122890			Plus / Plus	Plus / Plus	Sense	CAZ27855.1	WD-repeat protein, putative [Schistosoma mansoni]	3.2e-77	NP_851808	>gi|31317274|ref|NP_851808.1| WD repeat domain 20 isoform 1 [Homo sapiens]	Q2_P14689,Q2_P34597,Q2_P30170,Q2_P14850,Q2_P17886,Q2_P34777
12366	146	41	Q2_P17888	NO	C800008.1	SJCHGC02840 protein [Schistosoma japonicum] ||	CATATCGCTGCTGTTTCGTAGAAGAAATTCTCACGAGTACTTCCTTTATAGTTCTTTATT	0	C800008.1	Smp_006840			Plus / Plus	Plus / Plus	Sense	CAZ28399.1	expressed protein [Schistosoma mansoni]
33642	396	67	Q2_P17889	NO	C800009.1	SJCHGC02838 protein [Schistosoma japonicum] ||hypothetical protein DDB0190788 [Dictyostelium discoideum] gb|EAL72387.1| hypothetical protein DDB0190788 [Dictyostelium discoideum] ||endoglycoceramidase [Hydra magnipapillata] ||endoglycoceramidase [Cyanea nozakii] ||endoglycoceramidase [Cyanea nozakii] ||	GAACATGTGCTTGTTGAAATGGAACTTGTTAGAAAATAACTCAACTTGAATGTGACTGGA	0	C800009.1	Smp_155570			Plus / Plus	Plus / Plus	Sense	CAZ33725.1	hypothetical protein [Schistosoma mansoni]
16782	198	37	Q2_P17890	NO	C800010.1	SJCHGC09192 protein [Schistosoma japonicum] ||Unknown (protein for MGC:73267) [Danio rerio] gb|AAH63322.1| Unknown (protein for MGC:73267) [Danio rerio] ref|XP_690585.1| PREDICTED: similar to suppression of tumorigenicity 13 (colon carcinoma) (Hsp70 interacting protein) isoform 1 [Danio rerio] ref|NP_956063.1| suppression of tumorigenicity 13 (colon carcinoma) (Hsp70 interacting protein) [Danio r…	GAGGTATGCCTTTCGGAATGGGTGGGGCCGGGTTCAATATGCCTAACCAGTCATGTCCAG	0	C800010.1	Smp_062420.3			Plus / Plus	Plus / Plus	Sense	CAZ33759.1	heat shock protein 70 (hsp70)-interacting protein, putative [Schistosoma mansoni]	1.6e-63	NP_003923	>gi|19923193|ref|NP_003923.2| heat shock 70kD protein binding protein [Homo sapiens]	Q2_P17890,Q2_P20747,Q2_P30634,Q2_P10838,Q2_P10835
1161	14	56	Q2_P00008	NO	C800011.1	similar to ATP-dependent Clp protease ATP-binding subunit ClpX-like mitochondrial precursor [Gallus gallus] emb|CAG31266.1| hypothetical protein [Gallus gallus] ||hypothetical protein [Pongo pygmaeus] ||ClpX caseinolytic protease X homolog [Homo sapiens] emb|CAC01291.1| ClpX protein [Homo sapiens] emb|CAA06933.2| ClpX-like protein [Homo sapiens] sp|O76031|CLPX_HUMAN ATP-dependent Clp protease ATP…	GTGGTAACATTTTGCGAGACTATAATCTGTTCTTCATGAGATATCATAGCTTAGAAGCTT	0	C800011.1	Smp_063480			Plus / Minus	Plus / Minus	Sense	CAZ33856.1	ATP-dependent clp protease ATP-binding subunit clpx, putative [Schistosoma mansoni]	2e-91	NP_006651	>gi|7242140|ref|NP_006651.2| ClpX caseinolytic protease X homolog [Homo sapiens]
22773	268	78	Q2_P17891	NO	C800012.1	SJCHGC07005 protein [Schistosoma japonicum] ||Zgc:103767 [Danio rerio] ref|NP_001006006.1| hypothetical protein LOC449836 [Danio rerio] ||MGC80372 protein [Xenopus laevis] ||FRA10AC1 protein [Rattus norvegicus] ref|NP_001014268.1| FRA10AC1 protein [Rattus norvegicus] ref|XP_574663.1| PREDICTED: similar to FRA10AC1 protein isoform FRA10AC1-1 [Rattus norvegicus] sp|Q5FVF1|F10C1_RAT Protein FRA10AC1…	CTTCGTGATTATACTGCTATTATCACTTTTCGCCCCTACTTTCTATCTTCCTCTCCCTCT	0	C800012.1	Smp_039080			Plus / Plus	Plus / Plus	Sense	CAZ31507.1	expressed protein [Schistosoma mansoni]	2.6e-63	NP_660289	>gi|24432067|ref|NP_660289.2| FRA10AC1 protein [Homo sapiens]
26529	313	9	Q2_P17893	NO	C800014.1	none	TGGATCAAGCAGATGTTGTAACTTCACCCTCTAAACCATTAAATTCTACATACGATGCTC	0	C800014.1	Smp_088260			Plus / Plus	Plus / Plus	Sense	CAZ36101.1	cell wall protein Awa1p, putative [Schistosoma mansoni]				Q2_P17893,Q2_P00009,Q2_P31150,Q2_P11368,Q2_P01153
15173	179	43	Q2_P17894	NO	C800015.1	SJCHGC01839 protein [Schistosoma japonicum] ||unknown [Schistosoma japonicum] ||SJCHGC06484 protein [Schistosoma japonicum] ||SJCHGC09193 protein [Schistosoma japonicum] ||SJCHGC01569 protein [Schistosoma japonicum] ||	CCTGAAGATCCATACTACCTCCCATGAATTTAACCTGTTAATATAACTGATGGTCATTTA	0	C800015.1	Smp_070240			Plus / Plus	Plus / Plus	Sense
20904	246	79	Q2_P17895	NO	C800016.1	SJCHGC01243 protein [Schistosoma japonicum] ||SJCHGC02100 protein [Schistosoma japonicum] ||	CTCCTAGTAAGTTTAGAACTATTCAGACGCCATCAAAAGAAGTTACGGGTAATAATCAAT	0	C800016.1	Smp_121950			Plus / Plus	Plus / Plus	Sense	CAZ39124.1	expressed protein [Schistosoma mansoni]				Q2_P17895,Q2_P36612,Q2_P05751,Q2_P36757,Q2_P16481
19987	236	12	Q2_P17896	NO	C800017.1	none	CCGCCGAACAAGTAAACGATGAAGAAAATGTTAAAACAAATATCGAAAAAGTCCTTTCAG	0	C800017.1	Smp_142650.3			Plus / Plus	Plus / Plus	Sense	CAZ31378.1	expressed protein [Schistosoma mansoni]	3.8e-29	NP_060120	>gi|93204861|ref|NP_060120.2| protein phosphatase 1, regulatory (inhibitor) subunit 9A [Homo sapiens]	Q2_P00010,Q2_P17896,Q2_P08952,Q2_P28663,Q2_P18147
2092	25	52	Q2_P17897	NO	C800018.1	PREDICTED: similar to poly(A) binding protein II [Apis mellifera] ||CG2163-PB isoform B [Drosophila melanogaster] gb|AAF59127.1| CG2163-PA isoform A [Drosophila melanogaster] ref|NP_724648.1| CG2163-PB isoform B [Drosophila melanogaster] ref|NP_476902.1| CG2163-PA isoform A [Drosophila melanogaster] gb|AAL68327.1| RE69521p [Drosophila melanogaster] gb|AAL48102.1| RE74211p [Drosophila melanogaster…	TAAATTGGTGCTATTTTGGTTTTGTACCATCTGGCTTGTTTAACAATGTGTATGTCCGAT	0	C800018.1	Smp_007630.2			Plus / Plus	Plus / Plus	Sense	CAZ28471.1	polyadenylate binding protein, putative [Schistosoma mansoni]	1.7e-44	NP_004634	>gi|4758876|ref|NP_004634.1| poly(A) binding protein, nuclear 1 [Homo sapiens]
39181	461	81	Q2_P17898	NO	C800019.1	SJCHGC04517 protein [Schistosoma japonicum] ||Hypothetical protein CBG23361 [Caenorhabditis briggsae] ||Hypothetical protein F10C2.5 [Caenorhabditis elegans] ref|NP_506018.1| F10C2.5 [Caenorhabditis elegans] ||PREDICTED: similar to Putative alpha-mannosidase C20orf31 precursor [Strongylocentrotus purpuratus] ||PREDICTED: similar to Putative alpha-mannosidase C20orf31 precursor [Strongylocentrotus…	CAGTGAACATGTTCAATCTCAACTTGGTTATTCATCAAGTGATGCTTTCACTTGGATAAT	0	C800019.1	Smp_143170			Plus / Plus	Plus / Plus	Sense	CAZ31460.1	mannosyl-oligosaccharidealpha-1,2-mannosidase-r el ated [Schistosoma mansoni]	2e-163	NP_060687	>gi|222537737|ref|NP_060687.2| ER degradation enhancer, mannosidase alpha-like 2 isoform 1 [Homo sapiens]	Q2_P15895,Q2_P17898,Q2_P12479,Q2_P32274,Q2_P06261,Q2_P04416,Q2_P38307,Q2_P17831,Q2_P21607
19914	235	24	Q2_P17899	NO	C800020.1	unknown [Schistosoma japonicum] ||similar to NM_011971 proteasome (prosome macropain) subunit beta type 3 in Mus musculus [Schistosoma japonicum] ||SJCHGC02212 protein [Schistosoma japonicum] ||SJCHGC01130 protein [Schistosoma japonicum] ||proteasome (prosome macropain) subunit beta type 3 [Xenopus tropicalis] ||	CATTTTGAACGCTCTCAATCGTGACGCTGTATCTGGTTGGGGTGCTAGAGTCTATTTATT	0	C800020.1	Smp_121430.2			Plus / Plus	Plus / Plus	Sense	CAZ39086.1	proteasome subunit beta 3 (T01 family) [Schistosoma mansoni]	8.1e-73	NP_002786	>gi|22538465|ref|NP_002786.2| proteasome beta 3 subunit [Homo sapiens]	Q2_P17899,Q2_P08103,Q2_P09807,Q2_P37886,Q2_P29542,Q2_P17443
17529	207	19	Q2_P17900	NO	C800021.1	SJCHGC01209 protein [Schistosoma japonicum] ||unknown [Schistosoma japonicum] ||unknown [Schistosoma japonicum] ||tetraspanin TE736 [Schistosoma japonicum] ||SJCHGC02061 protein [Schistosoma japonicum] ||	GCCATTCCATTAGTATTTCTAAGTTGTCGTAGTTGCCATGGTAACCAATGTATTGTAATT	0	C800021.1	Smp_059530.2			Plus / Plus	Plus / Plus	Sense	CAZ33486.1	tetraspanin, putative [Schistosoma mansoni]
27488	324	33	Q2_P17901	NO	C800022.1	SJCHGC01683 protein [Schistosoma japonicum] ||ribosomal protein L6e [Carabus granulatus] ||unnamed protein product [Mus musculus] ||PREDICTED: similar to 60S ribosomal protein L6 (Neoplasm-related protein C140) [Rattus norvegicus] ||ribosomal protein L6 [Mus musculus] emb|CAA57513.1| M-TAXREB107 [Mus musculus] prf||2111243A tax responsible element-binding protein ||	CTTGCGTTCACTCTTTTCATTAGGTAAAAGGGACTATCCACACAAAATGATTTTCTAATG	0	C800022.1	Smp_038510.1			Plus / Plus	Plus / Plus	Sense	CAZ31439.1	60S ribosomal protein L6, putative [Schistosoma mansoni]	6.2e-49	NP_000961	>gi|16753227|ref|NP_000961.2| ribosomal protein L6 [Homo sapiens]	Q2_P17901,Q2_P24967,Q2_P33476
24868	293	48	Q2_P17902	NO	C800023.1	SJCHGC06829 protein [Schistosoma japonicum] gb|AAV91323.1| succinate dehydrogenase iron-sulfur protein [Schistosoma japonicum] ||succinate dehydrogenase Ip subunit [Gallus gallus] ||unnamed protein product [Tetraodon nigroviridis] ||succinate dehydrogenase Ip subunit [Mus musculus] gb|AAH51934.1| Succinate dehydrogenase Ip subunit [Mus musculus] gb|AAH13509.1| Succinate dehydrogenase Ip subunit […	ACAAGTGGTCACTTTATCGATGTCATACTATTATGAATTGCACAGAAACATGCCCAAAAG	0	C800023.1	Smp_089640.2			Plus / Plus	Plus / Plus	Sense	CAZ36223.1	succinate dehydrogenase iron-sulfur protein, putative [Schistosoma mansoni]	3e-115	NP_002991	>gi|115387094|ref|NP_002991.2| succinate dehydrogenase complex, subunit B, iron sulfur (Ip) precursor [Homo sapiens]	Q2_P17902,Q2_P33778,Q2_P36115
26934	317	74	Q2_P17903	NO	C800024.1	SJCHGC03528 protein [Schistosoma japonicum] ||unnamed protein product [Tetraodon nigroviridis] ||general transcription factor IIH polypeptide 3 34kDa [Homo sapiens] gb|AAH65250.1| General transcription factor IIH polypeptide 3 34kDa [Homo sapiens] gb|AAN40702.1| general transcription factor IIH polypeptide 3 34kDa [Homo sapiens] sp|Q13889|TF2H3_HUMAN TFIIH basal transcription factor complex p34 s…	GTGAATTACAGCCGTCTACAAGACATTTAGATGATTCCTTGGAGATGACTGTGGAGTTTA	0	C800024.1	Smp_122730			Plus / Plus	Plus / Plus	Sense	CAZ27826.1	expressed protein [Schistosoma mansoni]	5.8e-21	NP_055865	>gi|24307983|ref|NP_055865.1| FtsJ methyltransferase domain containing 2 [Homo sapiens]	Q2_P17903,Q2_P40716,Q2_P20450
26646	314	41	Q2_P17904	NO	C800025.1	SJCHGC05151 protein [Schistosoma japonicum] ||	GGATGTCCAATGTACTATTTCTAATAGCATCTAAATATCATCTTGCAGACTCATTGAAGC	0	C800025.1	Smp_045230			Plus / Plus	Plus / Plus	Sense	CAZ32081.1	expressed protein [Schistosoma mansoni]				Q2_P17904,Q2_P16023,Q2_P36321
44162	520	47	Q2_P17905	NO	C800026.1	SJCHGC06312 protein [Schistosoma japonicum] ||heat shock 70kDa protein 9B precursor [Homo sapiens] sp|P38646|GRP75_HUMAN Stress-70 protein mitochondrial precursor (75 kDa glucose regulated protein) (GRP 75) (Peptide-binding protein 74) (PBP74) (Mortalin) (MOT) ||PREDICTED: heat shock 70kDa protein 9B [Pan troglodytes] ||pre-mtHSP70 [Rattus sp.] ||grp75 [Rattus sp.] ref|XP_214583.3| PREDICTED: sim…	AATAACGATTGTTTGATTGTATCCATTCAGTTATTAGCTCCTTTAGAACTCGTCACTTGC	0	C800026.1	Smp_106130.2			Plus / Plus	Plus / Plus	Sense	CAZ37624.1	heat shock protein 70 (hsp70), putative [Schistosoma mansoni]	0.0	NP_004125	>gi|24234688|ref|NP_004125.3| heat shock 70kDa protein 9 precursor [Homo sapiens]
4107	49	27	Q2_P00011	NO	C800027.1	none	CATTATGGTCAACCCAGATAGCTGAGAATATTAAACGGTCTGGTAATTCGTAAATAATCT	0	C800027.1	Smp_155210			Plus / Minus	Plus / Minus	Sense	CAZ33659.1	hypothetical protein [Schistosoma mansoni]				Q2_P17906,Q2_P00011
31650	373	30	Q2_P17908	NO	C800029.1	SJCHGC08354 protein [Schistosoma japonicum] ||	CAAAGCGAAGTGGATAAATACCGACTCTTTCAGTGTTTCATTTTATCATGGTCATAACTA	0	C800029.1	Smp_065210.2			Plus / Plus	Plus / Plus	Sense	CAZ34009.1	expressed protein [Schistosoma mansoni]				Q2_P17908,Q2_P17379,Q2_P37791
12994	153	74	Q2_P17909	NO	C800030.1	PREDICTED: similar to T-complex protein 1 gamma subunit (TCP-1-gamma) (CCT-gamma) [Apis mellifera] ||Unknown (protein for MGC:127536) [Bos taurus] ||chaperonin containing TCP1 subunit 3 (gamma) variant [Homo sapiens] ||Unknown (protein for IMAGE:2820063) [Homo sapiens] ||Chaperonin containing TCP1 subunit 3 (gamma) [Homo sapiens] ||	GCCGCTGAATAAAGTTTCTGTCCCACTAAGCGTTTGTTAACCTAAAATATATATTGATTC	0	C800030.1	Smp_041740			Plus / Plus	Plus / Plus	Sense	CAZ31761.1	chaperonin containing t-complex protein 1, gamma subunit, tcpg, putative [Schistosoma mansoni]	0.0	NP_005989	>gi|63162572|ref|NP_005989.3| chaperonin containing TCP1, subunit 3 isoform a [Homo sapiens]	Q2_P14476,Q2_P04262,Q2_P27532,Q2_P17909
31314	369	34	Q2_P17910	NO	C800031.1	ATP-citrate (pro-S-)-lyase [Homo sapiens] ||unnamed protein product [Homo sapiens] ||ATP citrate lyase isoform 1 [Homo sapiens] gb|AAH06195.1| ATP citrate lyase isoform 1 [Homo sapiens] ||ATP citrate lyase isoform 2 [Homo sapiens] ||ACLY variant protein [Homo sapiens] ||	CCTTGGTTACTCGTATATGCATGTAAAATACACACATACACAAGTGTGTTTTTGCTAGTA	0	C800031.1	Smp_127730			Plus / Plus	Plus / Plus	Sense	CAZ28743.1	ATP-citrate synthase, putative [Schistosoma mansoni]	0.0	NP_001087	>gi|38569421|ref|NP_001087.2| ATP citrate lyase isoform 1 [Homo sapiens]
8595	102	10	Q2_P17911	NO	C800032.1	SJCHGC08432 protein [Schistosoma japonicum] ||Hypothetical protein C47E12.1 [Caenorhabditis elegans] ref|NP_501804.1| Seryl tRNA Synthetase family member (srs-2) [Caenorhabditis elegans] sp|Q18678|SYS_CAEEL Probable seryl-tRNA synthetase (Serine--tRNA ligase) (SerRS) ||Sars1 protein [Mus musculus] dbj|BAC35990.1| unnamed protein product [Mus musculus] sp|P26638|SYS_MOUSE Seryl-tRNA synthetase (Se…	TCTACAAATGCTAGATGAACGGGGTTTTACGCCACTGTACACTCCATTTTTTATGCGCAA	0	C800032.1	Smp_053610			Plus / Plus	Plus / Plus	Sense	CAZ32893.1	seryl-tRNA synthetase [Schistosoma mansoni]	3e-171	NP_006504	>gi|16306548|ref|NP_006504.2| seryl-tRNA synthetase [Homo sapiens]	Q2_P17911
786	10	21	Q2_P17912	NO	C800033.1	SJCHGC02879 protein [Schistosoma japonicum] ||PREDICTED: similar to CG17060-PA [Apis mellifera] ||PREDICTED OJ1715_A07.15 gene product [Oryza sativa (japonica cultivar-group)] ref|XP_476979.1| putative ras-related protein [Oryza sativa (japonica cultivar-group)] dbj|BAC83185.2| putative ras-related protein [Oryza sativa (japonica cultivar-group)] ||Ras-related protein Rab-10 (ORA1) gb|AAA49230.1|…	ATACAAAATTTATTTCAAGCAGTTGCTGAATGCATGGTGTCTACATGGGGTGCTCCAAAA	0	C800033.1	Smp_063070.1			Plus / Plus	Plus / Plus	Sense	CAZ33812.1	rabb and C, putative [Schistosoma mansoni]	7.4e-32	NP_057215	>gi|33695095|ref|NP_057215.2| ras-related GTP-binding protein RAB10 [Homo sapiens]	Q2_P17912
45024	530	59	Q2_P17913	NO	C800034.1	SJCHGC04075 protein [Schistosoma japonicum] ||PREDICTED: similar to KIAA1712 [Strongylocentrotus purpuratus] ||PREDICTED: similar to KIAA1712 [Danio rerio] ||mKIAA1712 protein [Mus musculus] ||similar to KIAA1712 protein [Mus musculus] gb|AAH88983.1| Similar to KIAA1712 protein [Mus musculus] ||	GGAGTTTCACTGCATCGATCAATTGAGCGAAATGTTGAAAAATCACTTGTTTCATCTAAT	0	C800034.1	Smp_145070			Plus / Plus	Plus / Plus	Sense	CAZ31806.1	asparagine-rich antigen, putative [Schistosoma mansoni]				Q2_P17913
4921	58	76	Q2_P17915	NO	C800036.1	none	GTTTAATGATTTTCCCACTCCAATTTCATCTCAGTCGAATGAGTTTTCAGGCTCATGCAG	0	C800036.1	Smp_045500			Plus / Plus	Plus / Plus	Sense	CAZ32106.1	annexin, putative [Schistosoma mansoni]	9.4e-80	NP_004025	>gi|4809279|ref|NP_004025.1| annexin VII isoform 2 [Homo sapiens]	Q2_P17915,Q2_P04641,Q2_P00730,Q2_P00014
9101	108	6	Q2_P17916	NO	C800037.1	hemoglobinase (EC 3.4.-.-) precursor - fluke (Schistosoma mansoni) sp|P09841|HGLB_SCHMA Hemoglobinase precursor (Antigen SM32) ||hemoglobinase ||asparaginyl endopeptidase [Schistosoma mansoni] ||protease ||hemoglobinase [Schistosoma japonicum] sp|P42665|HGLB_SCHJA Hemoglobinase precursor (Antigen Sj32) pir||S31908 hemoglobinase - fluke (Schistosoma japonicum) ||	GCAGATGGTTATACAGCTGAAACGATCAATGAAGCAATCATAAAAATTTGCGGTTAAATC	0	C800037.1	Smp_075800.2			Plus / Plus	Plus / Plus	Sense	CAZ34996.1	hemoglobinase (C13 family) [Schistosoma mansoni]	7.5e-79	NP_005597	>gi|56682962|ref|NP_005597.3| legumain preproprotein [Homo sapiens]
8631	102	46	Q2_P17917	NO	C800038.1	SJCHGC02821 protein [Schistosoma japonicum] ||unknown [Schistosoma japonicum] ||PREDICTED: similar to COP9 signalosome complex subunit 4 (Signalosome subunit 4) (SGN4) (JAB1-containing signalosome subunit 4) [Strongylocentrotus purpuratus] ||PREDICTED: similar to ENSANGP00000015673 [Apis mellifera] ||ENSANGP00000015673 [Anopheles gambiae str. PEST] ref|XP_318948.2| ENSANGP00000015673 [Anopheles g…	AATCGGGCATCTTTGCTGCAACCAGAATGTCAGAATCAACAACTGTTGGTTCGATACAAG	0	C800038.1	Smp_085640.1			Plus / Plus	Plus / Plus	Sense	CAZ35905.1	cop9 complex subunit, putative [Schistosoma mansoni]	1.4e-72	NP_057213	>gi|38373690|ref|NP_057213.2| COP9 signalosome subunit 4 [Homo sapiens]	Q2_P17917
5875	70	10	Q2_P17918	NO	C800039.1	Guanine nucleotide-binding protein G(s) alpha subunit (Adenylate cyclase-stimulating G alpha protein) gb|AAA29886.1| G protein alpha subunit ||SJCHGC09316 protein [Schistosoma japonicum] ||ENSANGP00000002249 [Anopheles gambiae str. PEST] gb|EAA00295.1| ENSANGP00000009208 [Anopheles gambiae str. PEST] ref|XP_320433.1| ENSANGP00000009208 [Anopheles gambiae str. PEST] ref|XP_307680.1| ENSANGP0000000…	CTTTTGGTATTCTTAAGTTTTGAAAGCATACTCTTCTGCCGAATTCACTGTTGATCAGAA	0	C800039.1	Smp_059340.1			Plus / Plus	Plus / Plus	Sense	CAZ33462.1	Guanine nucleotide-binding protein G(s) subunit alpha (Adenylate cyclase-stimulating G alpha protein), putative [Schistosoma mansoni]	1e-137	NP_001070957	>gi|117938765|ref|NP_001070957.1| GNAS complex locus isoform g [Homo sapiens]
2944	35	54	Q2_P17919	NO	C800040.1	none	GAAAACATCACCTTGAATAACAACAGCATGTCAATGACGAATTTCACATAAATCCCTCAT	0	C800040.1	Smp_165900.2			Plus / Plus	Plus / Plus	Sense	CAZ35456.1	n2,n2-dimethylguanosine tRNA methyltranserase related [Schistosoma mansoni]	3.6e-73	NP_060192	>gi|8923219|ref|NP_060192.1| tRNA methyltransferase 1 isoform 1 [Homo sapiens]
14442	170	77	Q2_P00017	NO	C800042.1	none	GTTACACAGGTCATATACTTCAGTTTTCATCTCCAGCCTCTTCATTACTGTCTCCACCAG	0	C800042.1	Smp_148220			Plus / Minus	Plus / Minus	Sense	CAZ32417.1	expressed protein [Schistosoma mansoni]				Q2_P01861,Q2_P20806,Q2_P01010,Q2_P05241,Q2_P00017,Q2_P25012,Q2_P19609
21585	254	80	Q2_P00019	NO	C800044.1	SJCHGC09189 protein [Schistosoma japonicum] ||	CTGTCCCACTTGTATATATACATATTGGTTACTTAGTCTCAGATGGAAAAATGTTGACTG	0	C800044.1	Smp_000720			Plus / Minus	Plus / Minus	Sense	CAZ27771.1	homeodomain-interacting protein kinase 2 (ec 2.7.1.37) (hhipk2); serine/threonine kinase [Schistosoma mansoni]	2e-123	NP_001041665	>gi|114796630|ref|NP_001041665.1| homeodomain interacting protein kinase 3 isoform 2 [Homo sapiens]
3993	47	83	Q2_P17922	NO	C800045.1	SJCHGC05259 protein [Schistosoma japonicum] ||echinonectin [Lytechinus variegatus] ||unnamed protein product [Mus musculus] ||unnamed protein product [Mus musculus] sp|P21956|MFGM_MOUSE Lactadherin precursor (Milk fat globule-EGF factor 8) (MFG-E8) (MFGM) (Sperm surface protein SP47) (MP47) dbj|BAA35180.1| milk fat globule glycoprotein MFG-E8 long form [Mus musculus] ||P47 protein [Mus musculus] …	AGATCGACGTTGGTCCACCAACATTAATAACTGGAGTTATTTTGAAATCACGAGGAGATG	0	C800045.1	Smp_135520			Plus / Plus	Plus / Plus	Sense	CAZ30141.1	dock, putative [Schistosoma mansoni]	6.9e-49	NP_065863	>gi|157426887|ref|NP_065863.2| dedicator of cytokinesis 6 [Homo sapiens]	Q2_P17922,Q2_P06914,Q2_P39651,Q2_P38509,Q2_P06655
20501	242	16	Q2_P00020	NO	C800046.1	none	GCGTAGAACTATGATTGATTTACCTTTGGATCATAAAACCACCAATGAAGATCCTATTGA	0	C800046.1	Smp_026040			Plus / Minus	Plus / Minus	Sense	CAZ30273.1	expressed protein [Schistosoma mansoni]	3e-105	NP_055754	>gi|42476076|ref|NP_055754.2| hypothetical protein LOC22878 [Homo sapiens]	Q2_P17923,Q2_P00020,Q2_P19910,Q2_P01184,Q2_P24005
17858	211	8	Q2_P17924	NO	C800047.1	CG14163-PA [Drosophila melanogaster] ref|NP_648374.1| CG14163-PA [Drosophila melanogaster] ||GA12797-PA [Drosophila pseudoobscura] ||PREDICTED: similar to SCY1-like 2 protein partial [Apis mellifera] ||D10Ertd802e protein [Mus musculus] gb|AAH42443.1| D10Ertd802e protein [Mus musculus] ||PREDICTED: similar to D10Ertd802e protein [Rattus norvegicus] ||	TTGGCCAATATACTGGGCAATCATACGAGGCTACAACAATTCATCATAGAAAATCTCAAA	0	C800047.1	Smp_156890			Plus / Plus	Plus / Plus	Sense	CAZ33931.1	protein kinase [Schistosoma mansoni]	3.9e-35	NP_060458	>gi|47604944|ref|NP_060458.3| SCY1-like 2 protein [Homo sapiens]	Q2_P40722,Q2_P17924
42641	502	56	Q2_P17925	NO	C800048.1	PREDICTED: similar to ENSANGP00000016526 partial [Apis mellifera] ||ENSANGP00000016526 [Anopheles gambiae str. PEST] ref|XP_312826.2| ENSANGP00000016526 [Anopheles gambiae str. PEST] ||CG3744-PB isoform B [Drosophila melanogaster] ref|NP_733056.2| CG3744-PB isoform B [Drosophila melanogaster] ||CG3744-PC isoform C [Drosophila melanogaster] gb|AAF56357.2| CG3744-PA isoform A [Drosophila melanogast…	TATATGAAGAAGTGGATGAACGTAATGTGGCTGTGACGAAATTATTTCATGGGGAATTCG	0	C800048.1	Smp_127840			Plus / Plus	Plus / Plus	Sense	CAZ28761.1	dipeptidyl-peptidase 9 (S09 family) [Schistosoma mansoni]	1.2e-38	NP_631898	>gi|194394146|ref|NP_631898.3| dipeptidylpeptidase 9 [Homo sapiens]	Q2_P17925,Q2_P15457,Q2_P35401
6643	79	13	Q2_P17926	NO	C800049.1	SJCHGC06607 protein [Schistosoma japonicum] ||hypothetical protein LOC415162 [Danio rerio] gb|AAH71403.1| Zgc:86727 [Danio rerio] ||PREDICTED: ubiquitin-conjugating enzyme E2L 3 like [Danio rerio] ||LOC446231 protein [Xenopus laevis] ||Unknown (protein for MGC:114833) [Xenopus laevis] ||	CGCCGGCAAAAAGTATAGAGTGATTAATACATCACTGATCTTCAAAATGTCAAACTAAGT	0	C800049.1	Smp_004350			Plus / Plus	Plus / Plus	Sense	CAZ28125.1	ubiquitin-conjugating enzyme E2 l, putative [Schistosoma mansoni]	1.6e-57	NP_003338	>gi|4507789|ref|NP_003338.1| ubiquitin-conjugating enzyme E2L 3 isoform 1 [Homo sapiens]
29385	346	60	Q2_P17927	NO	C800050.1	SJCHGC05910 protein [Schistosoma japonicum] ||	GTGGATTAATAGGAAACTGTCTAGCTGCTGCCATTACATGTGCAGGTTTAGCTCTGCTAA	0	C800050.1	Smp_120960.2			Plus / Plus	Plus / Plus	Sense	CAZ39052.1	ribonuclease pH related [Schistosoma mansoni]				Q2_P35285,Q2_P07545,Q2_P17927
828	10	63	Q2_P17928	NO	C800051.1	PREDICTED: similar to GA16319-PA [Apis mellifera] ||CG31550-PB isoform B [Drosophila melanogaster] ref|NP_730937.1| CG31550-PB isoform B [Drosophila melanogaster] ||CG31550-PA isoform A [Drosophila melanogaster] ref|NP_649544.1| CG31550-PA isoform A [Drosophila melanogaster] gb|AAL28176.1| GH04826p [Drosophila melanogaster] ||GA16319-PA [Drosophila pseudoobscura] ||ENSANGP00000017111 [Anopheles g…	CCTCGACGAGACTACTATTAATAGTGGTAAAGCTATATTACTGTTGATCATATTTGTTCC	0	C800051.1	Smp_049000			Plus / Plus	Plus / Plus	Sense	CAZ32443.1	arginine/serine rich splicing factor sf4/14, putative [Schistosoma mansoni]	1.1e-69	NP_757386	>gi|33469964|ref|NP_757386.2| splicing factor 4 [Homo sapiens]	Q2_P15584,Q2_P35557,Q2_P09248,Q2_P28992,Q2_P17928
24713	291	63	Q2_P17929	NO	C800052.1	PREDICTED: similar to Kelch-like protein 3 [Danio rerio] ||PREDICTED: similar to Kelch-like protein 3 [Danio rerio] ||Klhl2 protein [Mus musculus] gb|AAH31142.1| Klhl2 protein [Mus musculus] sp|Q8JZP3|KLHL2_MOUSE Kelch-like protein 2 ||mKIAA4249 protein [Mus musculus] ||PREDICTED: similar to actinfilin [Gallus gallus] ||	AATTTCGTGGAATCGAAAGTTCGGCTCTCATTCAGCTGGTCAACTTTATTTATACAAATG	0	C800052.1	Smp_141890			Plus / Plus	Plus / Plus	Sense	CAZ31258.1	kelch-like protein [Schistosoma mansoni]	3e-146	NP_059111	>gi|166235129|ref|NP_059111.2| kelch-like 3 [Homo sapiens]	Q2_P17929,Q2_P30671,Q2_P10875,Q2_P16652
18285	216	10	Q2_P17930	NO	C800053.1	SJCHGC07043 protein [Schistosoma japonicum] ||SJCHGC02099 protein [Schistosoma japonicum] ||SJCHGC09720 protein [Schistosoma japonicum] ||	CAGGATGTAACAGTGCTGTATGGGCAGCTGAAGTTCGTCAGCAATATCCAAATGACAATG	0	C800053.1	Smp_056390			Plus / Plus	Plus / Plus	Sense	CAZ33164.1	protein kinase [Schistosoma mansoni]				Q2_P17930,Q2_P21719,Q2_P05201,Q2_P35846
4349	52	14	Q2_P17931	NO	C800054.1	PREDICTED: similar to component of golgi transport complex 3 isoform 1 [Canis familiaris] ||PREDICTED: similar to component of golgi transport complex 3 isoform 2 [Canis familiaris] ||PREDICTED: similar to component of golgi transport complex 3 isoform 5 [Canis familiaris] ||PREDICTED: similar to component of golgi transport complex 3 isoform 4 [Canis familiaris] ||PREDICTED: similar to component…	CTTCATCGTATCTCGTGAGAAGTTGCTGCCAATTTTAAATAAACTCGATTCAAGTTTACT	0	C800054.1	Smp_130460			Plus / Plus	Plus / Plus	Sense	CAZ29228.1	expressed protein [Schistosoma mansoni]	7e-138	NP_113619	>gi|13899251|ref|NP_113619.1| component of golgi transport complex 3 [Homo sapiens]	Q2_P23059,Q2_P17931
35228	415	38	Q2_P17932	NO	C800055.1	SJCHGC01363 protein [Schistosoma japonicum] ||unknown [Schistosoma japonicum] ||	ATCCGACTATACGAATGATAGGCTGTCCAACATGAAAGTTTACTCAATTATCTAATTCCG	0	C800055.1	Smp_040280			Plus / Plus	Plus / Plus	Sense	CAZ31619.1	expressed protein [Schistosoma mansoni]				Q2_P25061,Q2_P17932
34755	409	75	Q2_P17933	NO	C800056.1	unnamed protein product [Tetraodon nigroviridis] ||PREDICTED: similar to hypothetical protein FLJ14154 [Gallus gallus] ||PREDICTED: similar to CG18177-PB isoform B isoform 1 [Bos taurus] ref|XP_614732.1| PREDICTED: similar to RIKEN cDNA 1200013P24 [Bos taurus] ||PREDICTED: similar to CG18177-PB isoform B isoform 3 [Bos taurus] ||PREDICTED: similar to CG18177-PB isoform B isoform 2 [Bos taurus] ||	CTGCTGATGGTTGTACATATGTTCTTCATACAAATGGTGGACATTTAGATTGTAAACCAA	0	C800056.1	Smp_131280			Plus / Plus	Plus / Plus	Sense	CAZ29371.1	bcl-2 homologous antagonist/killer (bak), putative [Schistosoma mansoni]				Q2_P17933,Q2_P31586,Q2_P38710,Q2_P40158,Q2_P21139,Q2_P24435,Q2_P04882,Q2_P02134,Q2_P40946
30921	364	66	Q2_P17934	NO	C800057.1	none	GTGGTTGTGTTGAACCATGTATAAGAAATGCTGTGATCACTTTACAAACATATCCTACAT	0	C800057.1	Smp_154630			Plus / Plus	Plus / Plus	Sense	CAZ33588.1	hypothetical protein [Schistosoma mansoni]				Q2_P17934,Q2_P20606,Q2_P01712,Q2_P26136,Q2_P10532,Q2_P30314,Q2_P39207
1920	23	50	Q2_P00021	NO	C800059.1	SJCHGC03633 protein [Schistosoma japonicum] ||	TTTAGCCTGTTCAGCCGGGAGAACGGATGATCAACAGTACCCGGGTAAAATCATCATTCA	0	C800059.1	Smp_155400			Plus / Minus	Plus / Minus	Sense	CAZ33691.1	ligatin, putative [Schistosoma mansoni]	2.8e-41	NP_008824	>gi|56699485|ref|NP_008824.2| ligatin [Homo sapiens]	Q2_P00021,Q2_P35470,Q2_P05311,Q2_P19470,Q2_P00948,Q2_P15521
21908	258	63	Q2_P17936	NO	C800060.1	gynecophoral canal protein ||gynecophoral canal protein [Schistosoma japonicum] ||gynecophoral canal protein [Schistosoma japonicum] ||unknown [Schistosoma japonicum] ||	GTGTAGAACTAGTTGATGCAGATATGGAATGTAACTCTGGCATTATCCATACAATTAGAT	0	C800060.1	Smp_177050			Plus / Plus	Plus / Plus	Sense	CAZ37055.1	gynecophoral canal protein, putative [Schistosoma mansoni]				Q2_P17936,Q2_P32047,Q2_P18901,Q2_P05937,Q2_P12241
11815	139	85	Q2_P00022	NO	C800062.1	SJCHGC02792 protein [Schistosoma japonicum] ||ADP/ATP carrier [Neocallimastix frontalis] gb|AAK59378.1| ADP/ATP carrier [Neocallimastix patriciarum] gb|AAL79525.1| ADP/ATP carrier [Neocallimastix patriciarum] ||rhodesiense ADP/ATP carrier ||hydrogenosomal ATP/ADP carrier [Neocallimastix frontalis] ||mitochondrial carrier protein [Trypanosoma brucei] ref|XP_827961.1| mitochondrial carrier protein …	TTAGTTTCCCAAAAAACCCGTTTCCCTAAGGGTTGCAATTAGCAGGAATTGTAAAGTTAG	0	C800062.1	Smp_079220			Plus / Minus	Plus / Minus	Sense	CAZ35281.1	ADP,ATP carrier protein, putative [Schistosoma mansoni]	4.9e-28	NP_112581	>gi|13775208|ref|NP_112581.1| solute carrier family 25 (mitochondrial carrier; adenine nucleotide translocator), member 31 [Homo sapiens]
7080	84	25	Q2_P17938	NO	C800063.1	SJCHGC09224 protein [Schistosoma japonicum] ||Hypothetical protein LOC574005 [Danio rerio] ref|NP_001020355.1| hypothetical protein LOC574005 [Danio rerio] ||PREDICTED: similar to Dnajb9-prov protein [Danio rerio] ||DnaJ (Hsp40) homolog subfamily B member 9 [Mus musculus] gb|AAH96676.1| DnaJ (Hsp40) homolog subfamily B member 9 [Mus musculus] gb|AAH42713.1| DnaJ (Hsp40) homolog subfamily B member…	TTTGTACAGCCGATGATCGTTATTATAGTGTTTCACAACGTCATTTTGTGTATATGAACG	0	C800063.1	Smp_078800			Plus / Plus	Plus / Plus	Sense	CAY17196.1	DNAj homolog subfamily B member, putative [Schistosoma mansoni]	1.8e-23	NP_036460	>gi|9558755|ref|NP_036460.1| DnaJ (Hsp40) homolog, subfamily B, member 9 [Homo sapiens]
22077	260	62	Q2_P17939	NO	C800064.1	PREDICTED: similar to regulatory factor X3 isoform b [Strongylocentrotus purpuratus] ||	GCTTGTTGATAATTACGAAACAGCTGAAGGTGTTAGTCTTCCACGTAGTACATTATATTT	0	C800064.1	Smp_170910			Plus / Plus	Plus / Plus	Sense	CAY17499.1	rfx transcription factor, putative [Schistosoma mansoni]	1.3e-91	NP_602304	>gi|19743884|ref|NP_602304.1| regulatory factor X3 isoform b [Homo sapiens]	Q2_P17939,Q2_P34155,Q2_P29008,Q2_P01737,Q2_P09261,Q2_P20632
12351	146	26	Q2_P17940	NO	C800065.1	SJCHGC07702 protein [Schistosoma japonicum] ||hypothetical protein LOC74549 [Mus musculus] dbj|BAC38382.1| unnamed protein product [Mus musculus] ||PREDICTED: similar to CG4203-PA isoform 1 [Canis familiaris] ||PREDICTED: similar to CG4203-PA isoform 3 [Canis familiaris] ||unnamed protein product [Mus musculus] ||	GCCATCCGATTATCAAATAACAGTCCATATTGGCATTGTCGAATCTTATTGGAACTGGCA	0	C800065.1	Smp_150960			Plus / Plus	Plus / Plus	Sense	CAZ32912.1	expressed protein [Schistosoma mansoni]	2e-140	NP_056144	>gi|133922609|ref|NP_056144.3| hypothetical protein LOC23383 [Homo sapiens]	Q2_P17940,Q2_P00379,Q2_P07865,Q2_P28836,Q2_P10523,Q2_P27478,Q2_P10848,Q2_P30644,Q2_P09107
27583	325	43	Q2_P17942	NO	C800067.1	Calpain (Calcium-activated neutral proteinase) (CANP) gb|AAA29857.1| Calpain ||calcium-activated neutral proteinase ||calpain [Schistosoma japonicum] ||calpain [Schistosoma japonicum] ||calpain [Schistosoma japonicum] ||	AAAAATGGATAATGGACTTATAGGTAGTCACGCATACAGTTTAACAGGTGTATATCCCGT	0	C800067.1	Smp_157500			Plus / Plus	Plus / Plus	Sense	CAZ34035.1	calpain (C02 family) [Schistosoma mansoni]	5.9e-72	NP_775110	>gi|27765074|ref|NP_775110.1| calpain 3 isoform c [Homo sapiens]	Q2_P17942,Q2_P34944,Q2_P15025,Q2_P35026,Q2_P15106,Q2_P19534,Q2_P00512,Q2_P19175,Q2_P35371,Q2_P37001,Q2_P18231,Q2_P18868
6004	71	54	Q2_P17943	NO	C800068.1	SJCHGC03001 protein [Schistosoma japonicum] ||SJCHGC03521 protein [Schistosoma japonicum] ||	GCTGTTCTTATGATGTAAAAATGGAAGCTGTCGTTGGTACACTACTTGGAACTATGTTAT	0	C800068.1	Smp_173730.2			Plus / Plus	Plus / Plus	Sense	CAY17667.1	expressed protein [Schistosoma mansoni]
31377	370	12	Q2_P17946	NO	C800071.1	SJCHGC06624 protein [Schistosoma japonicum] ||hypothetical protein DDB0186162 [Dictyostelium discoideum] gb|EAL65023.1| hypothetical protein DDB0186162 [Dictyostelium discoideum] ||hypothetical protein DDB0185634 [Dictyostelium discoideum] gb|EAL65615.1| hypothetical protein DDB0185634 [Dictyostelium discoideum] ||	TTTAACGATATGCTTAGACGTATGCCTGGTAAGTTAGATCATGCAACTATAGTTGCCTAT	0	C800071.1	Smp_018790			Plus / Plus	Plus / Plus	Sense	CAZ29558.1	expressed protein [Schistosoma mansoni]				Q2_P17946,Q2_P00588,Q2_P18984,Q2_P05108,Q2_P37306,Q2_P39540,Q2_P09136
19560	231	10	Q2_P17947	NO	C800072.1	SJCHGC06039 protein [Schistosoma japonicum] ||PREDICTED: similar to ENSANGP00000022171 [Apis mellifera] ||PREDICTED: similar to tensin-like SH2 domain containing 1 partial [Danio rerio] ||novel protein similar to the vertebrate tensin family [Danio rerio] ||PREDICTED: similar to tensin-like SH2 domain containing 1 partial [Danio rerio] ||	ACCACCTGGATATAAGCCTCCACCACAAATTGTAACTGGCTTACCATCGAATACTACGGA	0	C800072.1	Smp_144280			Plus / Plus	Plus / Plus	Sense	CAZ31651.1	tensin, putative [Schistosoma mansoni]	7.6e-24	NP_073585	>gi|65288071|ref|NP_073585.8| tensin 3 [Homo sapiens]	Q2_P17947,Q2_P20390,Q2_P18075,Q2_P00077,Q2_P02536,Q2_P27460,Q2_P36544,Q2_P10966,Q2_P08647,Q2_P28354,Q2_P11955,Q2_P31779,Q2_P16299,Q2_P30759
17747	209	67	Q2_P17948	NO	C800073.1	SJCHGC08674 protein [Schistosoma japonicum] ||	TCGAACTAAAATGCCAGAAGGTTATGATCGATTTATGAAAGGTGCCAGTTATATGGCAAA	0	C800073.1	Smp_174710			Plus / Plus	Plus / Plus	Sense	CAZ36709.1	Spindle assembly checkpoint component MAD1 (Mitotic arrest deficient protein 1), putative [Schistosoma mansoni]				Q2_P17948,Q2_P40656,Q2_P39885
22866	270	1	Q2_P17949	NO	C800074.1	SJCHGC01239 protein [Schistosoma japonicum] ||ribosomal protein L8e [Meladema coriacea] ||ENSANGP00000010416 [Anopheles gambiae str. PEST] ref|XP_315817.2| ENSANGP00000010416 [Anopheles gambiae str. PEST] ||PREDICTED: similar to ribosomal protein L8 [Apis mellifera] ||GA11728-PA [Drosophila pseudoobscura] ||	TATGGTTGGTCTCGTTGCTGGTGGCGGTCGGGTAGACAAACCAATTTTAAAAGCTGGTCG	0	C800074.1	Smp_051260			Plus / Plus	Plus / Plus	Sense	CAZ32663.1	60S ribosomal protein L8, putative [Schistosoma mansoni]	6e-115	NP_000964	>gi|4506663|ref|NP_000964.1| ribosomal protein L8 [Homo sapiens]	Q2_P37541,Q2_P17949
19744	233	24	Q2_P17950	NO	C800075.1	similar to GenBank Accession Number AK010678 ribosomal protein S3 in Mus musculus [Schistosoma japonicum] ||ribosomal protein S3 [Danio rerio] ||Ribosomal protein S3 [Xenopus tropicalis] ref|NP_989119.1| ribosomal protein S3 [Xenopus tropicalis] ||40S ribosomal protein S3 [Pseudopleuronectes americanus] ||unnamed protein product [Mus musculus] ||	GGCCGCTAAAGAAGAAGTTTTACCAACTGCTCCATATTCTGAAAACAAGATGTAATTAAT	0	C800075.1	Smp_027610			Plus / Plus	Plus / Plus	Sense	CAZ30437.1	40S ribosomal protein S3, putative [Schistosoma mansoni]	4.6e-86	NP_000996	>gi|15718687|ref|NP_000996.2| ribosomal protein S3 [Homo sapiens]	Q2_P20663,Q2_P17950
29528	348	33	Q2_P17951	NO	C800076.1	unknown [Schistosoma japonicum] ||unknown [Schistosoma japonicum] ||unknown [Schistosoma japonicum] ||tetraspanin TE736 [Schistosoma japonicum] ||SJCHGC01764 protein [Schistosoma japonicum] ||	GGTGGTTTAATTATAGCGGCGTTAATTGAATTCAGTACAGGTATAATATCAGCTATTTCG	0	C800076.1	Smp_194980			Plus / Plus	Plus / Plus	Sense	CAZ35784.1	similar to tetraspanin TE736 [Schistosoma mansoni]				Q2_P17951
32847	387	37	Q2_P17955	NO	C800080.1	SJCHGC04039 protein [Schistosoma japonicum] ||PREDICTED: similar to ERO1-like protein alpha precursor (ERO1-Lalpha) (Oxidoreductin 1-lalpha) (Endoplasmic oxidoreductin 1-like protein) (ERO1-L) [Strongylocentrotus purpuratus] ||PREDICTED: similar to endoplasmic reticulum oxidoreductin 1-Lbeta [Pan troglodytes] ||CG1333-PB isoform B [Drosophila melanogaster] gb|AAF47851.2| CG1333-PA isoform A [Dros…	TGGAATTACGTGCTTTAGCTAAAGCTGCACCTTATTTGATGAAACAAACTTATTTCACAG	0	C800080.1	Smp_124920			Plus / Plus	Plus / Plus	Sense	CAZ28224.1	ero1-related [Schistosoma mansoni]	1.6e-89	NP_055399	>gi|7657069|ref|NP_055399.1| ERO1-like [Homo sapiens]	Q2_P17955,Q2_P03164,Q2_P22422,Q2_P20345
29267	345	27	Q2_P17956	NO	C800081.1	SJCHGC04894 protein [Schistosoma japonicum] ||PREDICTED: similar to zinc finger protein 291 [Strongylocentrotus purpuratus] ||PREDICTED: similar to zinc finger protein 291 [Gallus gallus] ||PREDICTED: similar to zinc finger protein 291 partial [Bos taurus] ||ZNF291 protein [Homo sapiens] gb|AAP35408.1| zinc finger protein 291 [Homo sapiens] ||	GAATTCGGATAATCAAACAAGTTTACAATGTGGTCCATCACCAAATCTATTACAACGTCT	0	C800081.1	Smp_164280			Plus / Plus	Plus / Plus	Sense	CAZ35211.1	expressed protein [Schistosoma mansoni]	1.3e-63	NP_065894	>gi|225579092|ref|NP_065894.2| S-phase cyclin A-associated protein in the ER isoform a [Homo sapiens]	Q2_P17956,Q2_P14153,Q2_P34026,Q2_P02738,Q2_P21851,Q2_P06591,Q2_P27683,Q2_P08016,Q2_P09919,Q2_P29664,Q2_P26171,Q2_P30996
3964	47	54	Q2_P17957	NO	C800082.1	SJCHGC04884 protein [Schistosoma japonicum] ||Hypothetical protein LOC308958 [Rattus norvegicus] ref|NP_001020853.1| hypothetical protein LOC308958 [Rattus norvegicus] ||Hypothetical protein LOC336227 [Danio rerio] ref|NP_991127.1| hypothetical protein LOC336227 [Danio rerio] ||unnamed protein product [Mus musculus] ||cerebellar degeneration-related 2 [Mus musculus] sp|P97817|CDR2_MOUSE Cerebella…	CACCTTCACTGACAGATGATCAGTGTTCTTTAATTGATGAAGGCTATTGGCATGATAACG	0	C800082.1	Smp_173340			Plus / Plus	Plus / Plus	Sense	CAZ36544.1	transcription factor, putative [Schistosoma mansoni]				Q2_P17957,Q2_P10936,Q2_P30732
616	8	21	Q2_P17958	NO	C800083.1	SJCHGC04566 protein [Schistosoma japonicum] ||	ACGTGCTGAAATTTTACGTGATAGTCTAAAAGCTAGATATGAAGATCTAAGTCGTCAGAC	0	C800083.1	Smp_152000			Plus / Plus	Plus / Plus	Sense	CAZ33108.1	ubiquitin-specific peptidase 8 (C19 family) [Schistosoma mansoni]	5.7e-71	NP_005145	>gi|190684690|ref|NP_005145.3| ubiquitin specific peptidase 8 [Homo sapiens]	Q2_P17958,Q2_P09833,Q2_P29568,Q2_P27758,Q2_P28721,Q2_P38260,Q2_P17785,Q2_P09003,Q2_P08077
33376	393	56	Q2_P17960	NO	C800085.1	SJCHGC05972 protein [Schistosoma japonicum] ||	CCTATATGGTCAACTACCAACAAGAGATAATTTTAATTCTACAAGATCCTCTCCTAACCA	0	C800085.1	Smp_089240			Plus / Plus	Plus / Plus	Sense	CAZ36200.1	beta-1,2-n-acetylglucosaminyltransferase II, putative [Schistosoma mansoni]	2.7e-70	NP_002399	>gi|4505163|ref|NP_002399.1| mannosyl (alpha-1,6-)-glycoprotein beta-1,2-N-acetylglucosaminyltransferase [Homo sapiens]	Q2_P17960,Q2_P09806,Q2_P29541
12499	148	4	Q2_P17961	NO	C800086.1	PREDICTED: similar to CG4931-PA [Apis mellifera] ||MGC80158 protein [Xenopus laevis] ||PREDICTED: similar to p53 inducible protein isoform 2 [Danio rerio] ||PREDICTED: similar to CYFIP2 isoform 3 [Danio rerio] ||PREDICTED: similar to p53 inducible protein isoform 1 [Danio rerio] ||	ACCGCATCATGGCGTGAACCTTATCCACCGCCTAATCGTTATACTGCAGCTTTACTTCGA	0	C800086.1	Smp_150980.2			Plus / Plus	Plus / Plus	Sense	CAZ32916.1	P53 inducible protein-related [Schistosoma mansoni]	0.0	NP_055191	>gi|82617630|ref|NP_055191.2| cytoplasmic FMR1 interacting protein 2 [Homo sapiens]	Q2_P17961,Q2_P33479,Q2_P08616,Q2_P28323,Q2_P29267,Q2_P38635,Q2_P06680,Q2_P26272,Q2_P39264,Q2_P39942
35667	420	52	Q2_P17962	NO	C800087.1	PREDICTED: similar to RIKEN cDNA 1500041N16 [Rattus norvegicus] ||WD repeat protein [Rattus norvegicus] ||mitogen-activated protein kinase organizer 1 [Mus musculus] gb|AAQ64635.1| MAPK cascade scaffold protein [Mus musculus] dbj|BAB24241.1| unnamed protein product [Mus musculus] ||RIKEN cDNA 1500041N16 [Mus musculus] ||unnamed protein product [Mus musculus] ||	TACACAAGATTCAACTTTACGTCTATTCGATGCGTTAACCGGTGAACTTCTTAACAGATA	0	C800087.1	Smp_049890			Plus / Plus	Plus / Plus	Sense	CAZ32532.1	WD-repeat protein, putative [Schistosoma mansoni]	3.3e-69	NP_115708	>gi|14150114|ref|NP_115708.1| mitogen-activated protein kinase organizer 1 [Homo sapiens]	Q2_P17962,Q2_P28788,Q2_P09060
42079	496	4	Q2_P17963	NO	C800088.1	SJCHGC05226 protein [Schistosoma japonicum] ||nervous system adducin [Aplysia californica] ||SJCHGC05675 protein [Schistosoma japonicum] ||hypothetical protein [Gallus gallus] ||PREDICTED: similar to adducin 1 (alpha) isoform d erythrocyte adducin alpha subunit [Gallus gallus] ||	AGTGCCAGACCAGATGTCAGGTGTATTATTCATCTAAGTACTTCAGCTGCAGTAGCAGTA	0	C800088.1	Smp_071140			Plus / Plus	Plus / Plus	Sense	CAZ34541.1	adducin related protein [Schistosoma mansoni]	1.9e-92	NP_001110	>gi|29826319|ref|NP_001110.2| adducin 1 (alpha) isoform a [Homo sapiens]	Q2_P35813,Q2_P17963,Q2_P26380,Q2_P19137,Q2_P00726
33477	394	72	Q2_P17964	NO	C800089.1	SJCHGC00558 protein [Schistosoma japonicum] ||22.6kDa tegument-associated antigen [Schistosoma haematobium] ||22K antigen - fluke (Schistosoma mansoni) ||22.6 kDa tegument antigen [Schistosoma mansoni] sp|P14202|TEGU_SCHMA Tegument antigen (I(H)A) (Antigen SmA22.6) (A12) gb|AAA29922.1| SM22.6 antigen (A12) gb|AAA29856.1| antigen ||22.6 kDa tegumental antigen [Schistosoma japonicum] ||	GGCGTACACCATCTGGACAAAGATATAACTCTTGAATTGACGAAATTATTAACTTTTACC	0	C800089.1	Smp_045010			Plus / Plus	Plus / Plus	Sense	CAZ32061.1	22.6kDa tegument-associated antigen, putative [Schistosoma mansoni]				Q2_P40792,Q2_P17964
22853	269	73	Q2_P17965	NO	C800090.1	none	GGGCTACCAACCAAACTACCGTTTAATAATCATCTATACTGATTCTGATATCGATGAATT	0	C800090.1	Smp_034500			Plus / Plus	Plus / Plus	Sense	CAZ31138.1	dual specificity protein phosphatase, putative [Schistosoma mansoni]	1.6e-36	NP_009138	>gi|6005812|ref|NP_009138.1| dual specificity phosphatase 10 isoform a [Homo sapiens]	Q2_P00027,Q2_P17965
23630	278	85	Q2_P17967	NO	C800092.1	SJCHGC04195 protein [Schistosoma japonicum] ||	AACTTACTTCACTAAACGACGCAGACGTCGTCACTATAACAGTGAAAGTGGTTTATCCTC	0	C800092.1	Smp_167660			Plus / Plus	Plus / Plus	Sense	CAZ35727.1	protein phosphatase 1 binding protein, putative [Schistosoma mansoni]				Q2_P14859,Q2_P17967,Q2_P21245,Q2_P39836,Q2_P35132,Q2_P15213,Q2_P02211
18880	223	10	Q2_P17968	NO	C800093.1	SJCHGC03347 protein [Schistosoma japonicum] ||adenosine kinase a [Danio rerio] gb|AAH63961.1| Adenosine kinase a [Danio rerio] ||PREDICTED: similar to adenosine kinase isoform b isoform 3 [Canis familiaris] ||PREDICTED: similar to adenosine kinase isoform b isoform 1 [Canis familiaris] ||adenosine kinase b [Danio rerio] gb|AAH51621.1| Adenosine kinase b [Danio rerio] ||	ATGAAATGATATCCTACTCAAACATTGTCTTTGGAAATGAATCTGAAGCTGAAGCTTACG	0	C800093.1	Smp_008360			Plus / Plus	Plus / Plus	Sense	CAZ28543.1	adenosine kinase, putative [Schistosoma mansoni]	1.7e-54	NP_001114	>gi|32484973|ref|NP_001114.2| adenosine kinase isoform a [Homo sapiens]	Q2_P17968
28114	331	64	Q2_P17969	NO	C800094.1	none	AACTGATACAAATCCATTGAAAAACAAGGTTTCCGATCCAGCTGTGAATGCGACAAACTT	0	C800094.1	Smp_149210			Plus / Plus	Plus / Plus	Sense	CAZ32598.1	expressed protein [Schistosoma mansoni]				Q2_P01296,Q2_P20090,Q2_P13453,Q2_P17969,Q2_P33303,Q2_P00029
20013	236	38	Q2_P17970	NO	C800095.1	none	CAAGTGAACAATAGTACCAATAGTGATACTGTGGAGAAATATCAATCGTCACCAAATACA	0	C800095.1	Smp_115510			Plus / Plus	Plus / Plus	Sense	CAY18806.1	hypothetical protein [Schistosoma mansoni]
27069	319	39	Q2_P17971	NO	C800098.1	none	GCGGCTCGCTGTTCACAAATGAATCTCTTGACGAAATGGGGTTCTCTTGGTTGCGAATTA	0	C800098.1	Smp_054740			Plus / Plus	Plus / Plus	Sense	CAZ33001.1	hypothetical protein [Schistosoma mansoni]				Q2_P00032,Q2_P17971
10334	122	49	Q2_P17972	NO	C800099.1	SJCHGC04685 protein [Schistosoma japonicum] ||	CTAGTTCACGAAGTACTGAACCAAGTTCTGCAAATAGTACTACTGTTATATTACGTGAAA	0	C800099.1	Smp_082360			Plus / Plus	Plus / Plus	Sense	CAZ35565.1	protein tyrosine kinase, putative [Schistosoma mansoni]				Q2_P17972,Q2_P19707,Q2_P01073,Q2_P16417,Q2_P07828,Q2_P27433,Q2_P36685,Q2_P27399
25766	304	11	Q2_P00033	NO	C800100.1	SJCHGC02324 protein [Schistosoma japonicum] ||ENSANGP00000016749 [Anopheles gambiae str. PEST] ref|XP_319935.2| ENSANGP00000016749 [Anopheles gambiae str. PEST] ||PREDICTED: similar to Prolyl endopeptidase (Post-proline cleaving enzyme) (PE) isoform 2 [Canis familiaris] ||PREDICTED: similar to prolyl endopeptidase isoform 1 [Canis familiaris] ||PREDICTED: similar to prolyl endopeptidase isoform 5…	GCAGTATCCTGTGCAAATAAAAGTCCGAATTTATTCAAAGCAATCATCTTGGATAATCCA	0	C800100.1	Smp_130310			Plus / Minus	Plus / Minus	Sense	CAZ29203.1	prolyl oligopeptidase (S09 family) [Schistosoma mansoni]	3e-180	NP_005712	>gi|5031573|ref|NP_005712.1| ARP3 actin-related protein 3 homolog [Homo sapiens]	Q2_P32302,Q2_P00156,Q2_P19857,Q2_P01144,Q2_P14004,Q2_P33875,Q2_P07159,Q2_P22180,Q2_P39184,Q2_P10548,Q2_P30329,Q2_P31223,Q2_P11439,Q2_P00033
19172	226	47	Q2_P17973	NO	C800101.1	SJCHGC05624 protein [Schistosoma japonicum] ||	CAGCATCTGTTGCTACATCGAGTAAATCAAAAAGTCGAATTTCAAGTGTTAATGTGAATC	0	C800101.1	Smp_035260.1			Plus / Plus	Plus / Plus	Sense						Q2_P20862,Q2_P01915,Q2_P17973,Q2_P36724,Q2_P07754,Q2_P16451,Q2_P28505
41100	484	45	Q2_P17974	NO	C800102.1	none	CTGCCTCAAGTCTTCTCACTTAAAGGTTTAAGGTAAAATGTTGACATATACTTTACAAGG	0	C800102.1	Smp_136810			Plus / Plus	Plus / Plus	Sense	CAZ30381.1	proteolipid protein, putative [Schistosoma mansoni]				Q2_P00034,Q2_P29279,Q2_P17974
39709	468	14	Q2_P17975	NO	C800103.1	SJCHGC05079 protein [Schistosoma japonicum] ||SJCHGC04329 protein [Schistosoma japonicum] ||	ATGATGAGTACAAGAAAAAGAAACGATGGTATACGAAAGTAGCTAATCATGCTATGCATG	0	C800103.1	Smp_165200			Plus / Plus	Plus / Plus	Sense	CAZ35338.1	expressed protein [Schistosoma mansoni]				Q2_P16835,Q2_P17975,Q2_P30816,Q2_P37174,Q2_P23825,Q2_P11930,Q2_P31750,Q2_P11024
41196	485	56	Q2_P00035	NO	C800104.1	SJCHGC01111 protein [Schistosoma japonicum] ||GA19767-PA [Drosophila pseudoobscura] ||CG6671-PB isoform B [Drosophila melanogaster] ref|NP_523734.1| CG6671-PB isoform B [Drosophila melanogaster] dbj|BAA88078.1| argonaute protein [Drosophila melanogaster] ||CG6671-PC isoform C [Drosophila melanogaster] gb|AAF58314.1| CG6671-PA isoform A [Drosophila melanogaster] ref|NP_725342.1| CG6671-PC isoform …	GATCGCTTCAAAGTTCACATTTCACAAACTGATGGGATGTTTTTCTTGTGAAGTTTTGTT	0	C800104.1	Smp_102690.3			Plus / Minus	Plus / Minus	Sense	CAZ37318.1	eukaryotic translation initiation factor 2c, putative [Schistosoma mansoni]	4.4e-91	NP_079128	>gi|29294647|ref|NP_079128.2| eukaryotic translation initiation factor 2C, 3 isoform a [Homo sapiens]	Q2_P00035,Q2_P29599,Q2_P13855,Q2_P33726
9452	112	17	Q2_P17976	NO	C800105.1	hypothetical protein [Schistosoma japonicum] ||hypothetical protein [Schistosoma japonicum] ||	CACACTAATGATAATCGACCATCTCTTCATAAACGTTCTGCCGGACACGTAGATGAAGAA	0	C800105.1	Smp_079570			Plus / Plus	Plus / Plus	Sense	CAY17223.1	expressed protein [Schistosoma mansoni]
15679	185	39	Q2_P17977	NO	C800106.1	sec13-like protein [Danio rerio] ||PREDICTED: similar to sec13-like protein [Strongylocentrotus purpuratus] ||hypothetical protein LOC496570 [Xenopus tropicalis] gb|AAH84902.1| Hypothetical LOC496570 [Xenopus tropicalis] ||MGC82845 protein [Xenopus laevis] ||Unknown (protein for MGC:115524) [Xenopus laevis] ||	ATTGGTATCTTGTGGAAGATGTACATGCACTGAATGATCCTATTTACGATGTTTCATTCG	0	C800106.1	Smp_060180			Plus / Plus	Plus / Plus	Sense	CAZ33551.1	nucleoporin seh1 (sec13-like protein) [Schistosoma mansoni]	1.3e-93	NP_112493	>gi|61743969|ref|NP_112493.2| sec13-like protein isoform 2 [Homo sapiens]	Q2_P02191,Q2_P17977
521	7	11	Q2_P17978	NO	C800107.1	polymerase (DNA directed) delta 2 regulatory subunit [Mus musculus] sp|O35654|DPOD2_MOUSE DNA polymerase delta subunit 2 (DNA polymerase delta subunit p50) emb|CAA96567.1| DNA polymerase delta small subunit [Mus musculus] ||polymerase (DNA directed) delta 2 regulatory subunit [Mus musculus] gb|AAH03342.1| Polymerase (DNA directed) delta 2 regulatory subunit [Mus musculus] ||Pold2-prov protein [Xe…	CACACACTGATTCTGGTTTGATACATCTTCTGATTTTAGGTGATTCAATTCAAGCATCAA	0	C800107.1	Smp_076660			Plus / Plus	Plus / Plus	Sense	CAZ35077.1	DNA polymerase delta small subunit, putative [Schistosoma mansoni]	3.7e-52	NP_006221	>gi|5453924|ref|NP_006221.1| DNA-directed DNA polymerase delta 2 [Homo sapiens]	Q2_P17978
20815	245	75	Q2_P00036	NO	C800109.1	SJCHGC05790 protein [Schistosoma japonicum] ||cullin-4A [Homo sapiens] ||cullin 4A isoform 1 [Homo sapiens] gb|AAR13072.1| cullin 4A [Homo sapiens] gb|AAH08308.2| Cullin 4A isoform 1 [Homo sapiens] ||cullin 4A isoform 2 [Homo sapiens] emb|CAI13795.1| CUL4A [Homo sapiens] sp|Q13619|CUL4A_HUMAN Cullin-4A (CUL-4A) gb|AAD45191.1| cullin 4A [Homo sapiens] ||Homo sapiens cullin 4A [synthetic construct]…	CCACTACTGCTATCTTCATCCAGACTGGGTTACAAATAATAAAAAGGCTGATTGAGAAAA	0	C800109.1	Smp_082850.1			Plus / Minus	Plus / Minus	Sense	CAZ35614.1	cullin, putative [Schistosoma mansoni]	3e-165	NP_003579	>gi|121114298|ref|NP_003579.3| cullin 4B isoform 1 [Homo sapiens]
35686	420	71	Q2_P17980	NO	C800110.1	hypothetical protein [Gallus gallus] ref|NP_001026712.1| similar to T-complex protein 1 eta subunit (TCP-1-eta) (CCT-eta) (HIV-1 Nef interacting protein) [Gallus gallus] ||LOC495278 protein [Xenopus laevis] ||Cct7-prov protein [Xenopus tropicalis] ||Unknown (protein for MGC:108310) [Xenopus tropicalis] ||Cct7-prov protein [Xenopus laevis] ||	CTGGAATGAGGCATTAAAGTACTATCTGCGTTGTGCTTTTAAAATGAATAGGCTGAAATA	0	C800110.1	Smp_149900			Plus / Plus	Plus / Plus	Sense	CAZ32725.1	chaperonin containing t-complex protein 1, eta subunit, tcph, putative [Schistosoma mansoni]	0.0	NP_006420	>gi|5453607|ref|NP_006420.1| chaperonin containing TCP1, subunit 7 isoform a [Homo sapiens]	Q2_P17980
33890	399	60	Q2_P17981	NO	C800111.1	Hypothetical protein LOC553723 [Danio rerio] ref|NP_001018530.1| hypothetical protein LOC553723 [Danio rerio] ||Zgc:112384 protein [Danio rerio] ||ENSANGP00000022982 [Anopheles gambiae str. PEST] ref|XP_311606.2| ENSANGP00000022982 [Anopheles gambiae str. PEST] ||PREDICTED: similar to CG4291-PA [Strongylocentrotus purpuratus] ||PREDICTED: similar to WW domain-containing binding protein 4 [Bos tau…	CCAAAGGAGCTAATGAAGCAGTACTACAAGTGTTTAATGTACCTACATCAGATATCGAGC	0	C800111.1	Smp_133940			Plus / Plus	Plus / Plus	Sense	CAZ29845.1	expressed protein [Schistosoma mansoni]	1.3e-23	NP_009118	>gi|6005948|ref|NP_009118.1| WW domain-containing binding protein 4 [Homo sapiens]	Q2_P17981
8619	102	34	Q2_P17984	NO	C800114.1	SJCHGC03571 protein [Schistosoma japonicum] ||	AAAAAGCGACCTCCAGTTTACCAACAGCGTCCGGTCATAAAGTTTCTTCTGTTGAGTCAG	0	C800114.1	Smp_011860			Plus / Plus	Plus / Plus	Sense	CAZ28879.1	transcription factor LCR-F1 , putative [Schistosoma mansoni]				Q2_P17984,Q2_P37296,Q2_P16948
148	2	63	Q2_P00039	NO	C800115.1	putative fructose-1 6-bisphosphatase [Schistosoma mansoni] ||SJCHGC06706 protein [Schistosoma japonicum] ||Fbp-prov protein [Xenopus laevis] ||Fructose-1 6-bisphosphatase 1 (D-fructose-1 6-bisphosphate 1-phosphohydrolase 1) (FBPase 1) pdb|1BK4|A Chain A Crystal Structure Of Rabbit Liver Fructose-1 6- Bisphosphatase At 2.3 Angstrom Resolution ||PREDICTED: similar to fructose-1 6-bisphosphatase 1 l…	GCTGGATGATCCATATGATCCAGATCAAAGAATAAAACTCTGATCAAAAAGCAAACAAAC	0	C800115.1	Smp_097370			Plus / Minus	Plus / Minus	Sense	CAZ36866.1	fructose-1,6-bisphosphatase-related [Schistosoma mansoni]	7e-119	NP_000498	>gi|16579888|ref|NP_000498.2| fructose-1,6-bisphosphatase 1 [Homo sapiens]
1373	17	13	Q2_P00041	NO	C800117.1	SJCHGC07957 protein [Schistosoma japonicum] ||ENSANGP00000010880 [Anopheles gambiae str. PEST] ref|XP_308277.2| ENSANGP00000010880 [Anopheles gambiae str. PEST] ||CG8705-PB isoform B [Drosophila melanogaster] gb|AAM68857.1| CG8705-PA isoform A [Drosophila melanogaster] ref|NP_724659.1| CG8705-PB isoform B [Drosophila melanogaster] ref|NP_477064.1| CG8705-PA isoform A [Drosophila melanogaster] gb|…	GGTAGGTAGGTAGGTATAAATTATTTGTGACCTCAGTCTGTTACGATTTGTTGTTTTACA	0	C800117.1	Smp_060070			Plus / Minus	Plus / Minus	Sense	CAZ33541.1	septin, putative [Schistosoma mansoni]	7e-111	NP_001011553	>gi|148352329|ref|NP_001011553.2| cell division cycle 10 isoform 2 [Homo sapiens]
40927	482	42	Q2_P17986	NO	C800118.1	none	GTTGGCCATTTCATCAATCTCTATGATAGTTATTGGACTGATCAATGGTCATTTAAGAAG	0	C800118.1	Smp_123100			Plus / Plus	Plus / Plus	Sense	CAZ27889.1	hypothetical protein [Schistosoma mansoni]
27647	326	22	Q2_P17987	NO	C800119.1	peptidylglycine alpha-amidating monooxygenase [Bos taurus] sp|P10731|AMD_BOVIN Peptidyl-glycine alpha-amidating monooxygenase precursor (PAM) gb|AAA30683.1| PAM precursor ||peptidylglycine alpha-amidating monooxygenase [Rattus norvegicus] ||peptidylglycine alpha-amidating monooxygenase precursor [Rattus norvegicus] ||peptidylglycine alpha-amidating monooxygenase precursor [Rattus norvegicus] gb|A…	ATATCTATTTGAGTACAAGCAACCAGAGAAGAGACGAATCTATGGCGTTGCTATTGAACC	0	C800119.1	Smp_010820			Plus / Plus	Plus / Plus	Sense	CAZ28771.1	peptidyl-glycine alpha-amidating monooxygenase, putative [Schistosoma mansoni]	1e-48	NP_620121	>gi|21070974|ref|NP_620121.1| peptidylglycine alpha-amidating monooxygenase isoform b preproprotein [Homo sapiens]	Q2_P17987,Q2_P31683,Q2_P18529
44065	519	35	Q2_P17989	NO	C800121.1	SJCHGC03515 protein [Schistosoma japonicum] ||hypothetical protein LOC513552 [Bos taurus] gb|AAX08783.1| DKFZP564K2062 protein [Bos taurus] ||hypothetical protein LOC66690 [Mus musculus] dbj|BAE35366.1| unnamed protein product [Mus musculus] dbj|BAE35321.1| unnamed protein product [Mus musculus] dbj|BAC40482.1| unnamed protein product [Mus musculus] dbj|BAB26157.2| unnamed protein product [Mus mu…	GTATTGAACGAACCTTCCTGCTAACTAATGTGAAATCGGAAATATTGGACAGAGAAAAGT	0	C800121.1	Smp_059240			Plus / Plus	Plus / Plus	Sense	CAZ33450.1	expressed protein [Schistosoma mansoni]				Q2_P17989
39147	461	47	Q2_P17990	NO	C800122.1	OTTHUMP00000042159 [Homo sapiens] ||selenoprotein O [Homo sapiens] ref|NP_113642.1| selenoprotein O [Homo sapiens] ||Selenoprotein O ||PREDICTED: similar to Selenoprotein O [Rattus norvegicus] ||PREDICTED: similar to selenoprotein O [Gallus gallus] ||	TTGTTATTGTGGGTATCAATTTGGTAGTTTTGCTGGTCAACTTGGCGATGGTGCAGCAAT	0	C800122.1	Smp_131690			Plus / Plus	Plus / Plus	Sense	CAZ29441.1	Crumbs complex protein; MAGUK homolog; cell polarity protein; serine/threonine kinase [Schistosoma mansoni]	0.0	NP_001119527	>gi|186700629|ref|NP_001119527.1| calcium/calmodulin-dependent serine protein kinase isoform 3 [Homo sapiens]	Q2_P17990,Q2_P02408,Q2_P21471,Q2_P13538,Q2_P09378,Q2_P06239,Q2_P37170,Q2_P27207,Q2_P40712,Q2_P40612,Q2_P40167,Q2_P41398,Q2_P07657
36797	433	77	Q2_P17991	NO	C800123.1	SJCHGC02398 protein [Schistosoma japonicum] ||PREDICTED: similar to Beta-galactosidase precursor (Lactase) (Acid beta-galactosidase) [Rattus norvegicus] ||LOC443705 protein [Xenopus laevis] ||LOC443705 protein [Xenopus laevis] ||Galactosidase beta 1-like [Xenopus tropicalis] ref|NP_001011038.1| galactosidase beta 1-like [Xenopus tropicalis] ||	TCAGGGTGGAACTAATTTTGGATTTTGGAACGGTGGTGCAAGACCTGAATCATCAATTAC	0	C800123.1	Smp_011990			Plus / Plus	Plus / Plus	Sense	CAZ28893.1	beta-galactosidase, putative [Schistosoma mansoni]	1.2e-97	NP_078782	>gi|40255043|ref|NP_078782.3| galactosidase, beta 1-like [Homo sapiens]	Q2_P17991,Q2_P11266,Q2_P31053,Q2_P18737
18094	213	74	Q2_P17992	NO	C800124.1	unknown [Schistosoma mansoni] ||Zgc:101881 [Danio rerio] ref|NP_001004672.1| hypothetical protein LOC447934 [Danio rerio] ||Lin7c-prov protein [Xenopus laevis] ||hypothetical protein [Gallus gallus] ref|NP_001026238.1| similar to lin-7-C lin 7 homolog C [Gallus gallus] ||PREDICTED: similar to lin-7 homolog C partial [Bos taurus] ||	CACAGATTAAGTTTTCGAACTCTTTTTTCCCCAACTCTTTACATCCTCATTAGAATCTGT	0	C800124.1	Smp_055600			Plus / Plus	Plus / Plus	Sense	CAZ33068.1	lin-7-like proteins [Schistosoma mansoni]	3.3e-73	NP_071448	>gi|11545920|ref|NP_071448.1| lin-7 homolog B [Homo sapiens]
44681	526	56	Q2_P17993	NO	C800125.1	SJCHGC02336 protein [Schistosoma japonicum] ||Major egg antigen (p40) ||40k egg antigen (clone 10F5) - fluke (Schistosoma mansoni) ||major egg antigen ||SJCHGC09367 protein [Schistosoma japonicum] ||	GTCCAATCGCTATTCGACCTACATCCAATATTAATACTAGAAATGTAACACCATCTAAAG	0	C800125.1	Smp_148530			Plus / Plus	Plus / Plus	Sense	CAZ32466.1	heat shock protein hsp16, putative [Schistosoma mansoni]
23593	278	48	Q2_P17994	NO	C800126.1	SJCHGC07025 protein [Schistosoma japonicum] ||ENSANGP00000012197 [Anopheles gambiae str. PEST] ref|XP_313803.2| ENSANGP00000012197 [Anopheles gambiae str. PEST] ||CG31170-PA isoform A [Drosophila melanogaster] ref|NP_732735.1| CG31170-PA isoform A [Drosophila melanogaster] ||CG31170-PB isoform B [Drosophila melanogaster] ref|NP_732734.2| CG31170-PB isoform B [Drosophila melanogaster] ||epsin-like…	TTGATGATTGGCATGTGGGTAAAGAACGTGGTGTAATGGACGATGTTTTAGAACAGTTCA	0	C800126.1	Smp_140330			Plus / Plus	Plus / Plus	Sense	CAZ31040.1	epsin 4/enthoprotin, putative [Schistosoma mansoni]	1.1e-46	NP_055481	>gi|7661968|ref|NP_055481.1| epsin 4 [Homo sapiens]	Q2_P17994,Q2_P26067,Q2_P06487,Q2_P40343
30665	361	65	Q2_P17995	NO	C800127.1	SJCHGC05115 protein [Schistosoma japonicum] ||Djsyt protein [Dugesia japonica] ||synaptotagmin I VQ/C2B-beta splice variant [Aplysia californica] ||synaptotagmin gb|AAA03567.1| synaptotagmin p65 ||Synaptotagmin-1 (Synaptotagmin I) (p65) ||	CTGGAACATCTGATCCATATGTGAAAGTATTTCTATTGCCTGAGAAGAAGAAGAAATATG	0	C800127.1	Smp_175900			Plus / Plus	Plus / Plus	Sense	CAZ36918.1	synaptotagmin 1,2, putative [Schistosoma mansoni]	2.2e-95	NP_005630	>gi|5032139|ref|NP_005630.1| synaptotagmin I [Homo sapiens]	Q2_P17995
25929	306	4	Q2_P17998	NO	C800131.1	SJCHGC04719 protein [Schistosoma japonicum] ||PREDICTED: similar to transmembrane protein 62 isoform 1 [Canis familiaris] ||PREDICTED: similar to transmembrane protein 62 isoform 2 [Bos taurus] ||Hypothetical protein LOC402997 [Danio rerio] ref|NP_991259.1| hypothetical protein LOC402997 [Danio rerio] ||PREDICTED: hypothetical protein XP_793639 [Strongylocentrotus purpuratus] ||	AGGGGCCGATTTTCATTTAGGTCCAACATATTCAAACTTGTAAAACCATATGGTCAGTAT	0	C800131.1	Smp_145760			Plus / Plus	Plus / Plus	Sense	CAY16881.1	helicase, putative [Schistosoma mansoni]	1.1e-52	NP_079232	>gi|52851437|ref|NP_079232.3| transmembrane protein 62 [Homo sapiens]	Q2_P17998
24496	289	16	Q2_P17999	NO	C800132.1	SJCHGC03473 protein [Schistosoma japonicum] ||ENSANGP00000011118 [Anopheles gambiae str. PEST] ref|XP_309629.2| ENSANGP00000011118 [Anopheles gambiae str. PEST] ||PREDICTED: similar to DNA topoisomerase I isoform 2 [Strongylocentrotus purpuratus] ||Hypothetical protein CBG20349 [Caenorhabditis briggsae] ||Hypothetical protein M01E5.5a [Caenorhabditis elegans] ref|NP_493337.1| TOPoisomerase family…	GGGATCTATGTACGTATAATTTAATGTGAAGCCACATTATCTTTGCTCGATCATTTGTGT	0	C800132.1	Smp_033050.2			Plus / Plus	Plus / Plus	Sense	CAZ30980.1	DNA topoisomerase type I, putative [Schistosoma mansoni]	0.0	NP_003277	>gi|11225260|ref|NP_003277.1| DNA topoisomerase I [Homo sapiens]
37695	444	40	Q2_P18000	NO	C800133.1	signal recognition particle 72 kDa subunit sp|P49965|SR72_SCHMA SIGNAL RECOGNITION PARTICLE 72 KD PROTEIN (SRP72) ||SJCHGC05887 protein [Schistosoma japonicum] ||MGC82921 protein [Xenopus laevis] ||hypothetical protein [Gallus gallus] ref|NP_001006449.1| signal recognition particle 72kDa [Gallus gallus] ||unnamed protein product [Tetraodon nigroviridis] ||	GTAATTTATGTCTCTCTGAAGACCCGGAATTAACTGAAGAGGAGAGGAATGAAGAGTTAG	0	C800133.1	Smp_048280.1			Plus / Plus	Plus / Plus	Sense	CAZ32379.1	signal recognition particle 72 kDa subunit, putative [Schistosoma mansoni]	1.2e-74	NP_008878	>gi|109638749|ref|NP_008878.3| signal recognition particle 72kDa [Homo sapiens]	Q2_P18000,Q2_P05754,Q2_P25344,Q2_P28633
34222	403	52	Q2_P18001	NO	C800134.1	SJCHGC04791 protein [Schistosoma japonicum] ||PREDICTED: similar to ENSANGP00000002091 [Apis mellifera] ||PRR5-ARHGAP8 fusion protein [Homo sapiens] gb|AAK58136.1| rho GTPase activating protein 8 isoform 1 [Homo sapiens] ||Unknown (protein for IMAGE:5190702) [Homo sapiens] ||ARHGAP8 protein [Homo sapiens] ||	CTAACAAAAATCGACCTAAATTTAAATGGCTTGTTCAAGCTTATAGAACATTTGGGCGCA	0	C800134.1	Smp_006970			Plus / Plus	Plus / Plus	Sense	CAZ28415.1	expressed protein [Schistosoma mansoni]	2e-45	NP_851851	>gi|226423858|ref|NP_851851.2| PRR5-ARHGAP8 fusion protein [Homo sapiens]	Q2_P18001,Q2_P08126,Q2_P27807
31964	377	4	Q2_P18002	NO	C800135.1	SJCHGC08038 protein [Schistosoma japonicum] ||PREDICTED: similar to Elongation factor G 2 mitochondrial precursor (mEF-G 2) (Elongation factor G2) [Strongylocentrotus purpuratus] ||PREDICTED: similar to mitochondrial elongation factor G2 isoform 1 [Apis mellifera] ||PREDICTED: similar to mitochondrial elongation factor G2 isoform 1 isoform 1 [Danio rerio] ||PREDICTED: similar to mitochondrial elo…	GTTGCCTACAAAAGCACATTATATACCTATTCACTGGCCAGTATTTTCTCATAGTCTTAA	0	C800135.1	Smp_165840.1			Plus / Plus	Plus / Plus	Sense	CAZ35448.1	translation elongation factor G, putative [Schistosoma mansoni]	6e-103	NP_115756	>gi|19923640|ref|NP_115756.2| mitochondrial elongation factor G2 isoform 1 [Homo sapiens]	Q2_P23330,Q2_P18002
28831	340	16	Q2_P18003	NO	C800136.1	Rac GTPase [Schistosoma mansoni] ||Rac1 protein [Ciona intestinalis] emb|CAD48474.1| Rac1 protein [Ciona intestinalis] ||Rac [Aplysia californica] ||PREDICTED: similar to RAS-related C3 botulinum substrate 1 [Pan troglodytes] ||Ras-related C3 botulinum toxin substrate 1 isoform Rac1 [Homo sapiens] gb|AAP35785.1| ras-related C3 botulinum toxin substrate 1 (rho family small GTP binding protein Rac1…	CAACCATGTTTTCTAATTATCCGGTTGATATTCACTATTCACAGTTACACACGCAAACAG	0	C800136.1	Smp_062300.1			Plus / Plus	Plus / Plus	Sense	CAZ33745.1	rac gtpase, putative [Schistosoma mansoni]	2.4e-81	NP_008839	>gi|9845511|ref|NP_008839.2| ras-related C3 botulinum toxin substrate 1 isoform Rac1 [Homo sapiens]
7153	85	13	Q2_P18004	NO	C800137.1	SJCHGC03811 protein [Schistosoma japonicum] ||	GTCTTACATCAAGACTCAGAAACTAAGGAAAAAAGAACAGAACGATCATGACGATGTATA	0	C800137.1	Smp_149660			Plus / Plus	Plus / Plus	Sense	CAZ32690.1	expressed protein [Schistosoma mansoni]				Q2_P18004,Q2_P11307,Q2_P38421,Q2_P16418,Q2_P36686,Q2_P31095
19807	234	2	Q2_P18005	NO	C800138.1	SJCHGC02571 protein [Schistosoma japonicum] ||similar to NM_014189 adducin 1 (alpha) isoform b in Homo sapiens [Schistosoma japonicum] ||nervous system adducin [Aplysia californica] ||hypothetical protein [Gallus gallus] ||PREDICTED: similar to adducin 1 (alpha) isoform d erythrocyte adducin alpha subunit [Gallus gallus] ||	GCAAATCAGAAAACAACGACTGTTGTATCCTAACTCATGGGACTATTGTCTAAATAAGAA	0	C800138.1	Smp_083040.1			Plus / Plus	Plus / Plus	Sense	CAZ35634.1	adducin related protein [Schistosoma mansoni]	2e-65	NP_001110	>gi|29826319|ref|NP_001110.2| adducin 1 (alpha) isoform a [Homo sapiens]
25462	300	47	Q2_P00044	NO	C800139.1	SJCHGC09274 protein [Schistosoma japonicum] ||unnamed protein product [Mus musculus] ||unnamed protein product [Mus musculus] ||component of oligomeric golgi complex 2 [Mus musculus] gb|AAH11435.1| Component of oligomeric golgi complex 2 [Mus musculus] sp|Q921L5|COG2_MOUSE Conserved oligomeric Golgi complex component 2 (Low density lipoprotein receptor defect C-complementing protein) ||component …	GTAGTGGATTTCACTCAGATGATAAAATTCGTCATCAATTGTACTTGGATGCTAAAGCAT	0	C800139.1	Smp_143570			Plus / Minus	Plus / Minus	Sense	CAZ31534.1	expressed protein [Schistosoma mansoni]	1.7e-77	NP_001138508	>gi|223029519|ref|NP_001138508.1| component of oligomeric golgi complex 2 isoform 2 [Homo sapiens]	Q2_P12444,Q2_P00044,Q2_P19298,Q2_P01258,Q2_P20041,Q2_P37826,Q2_P14740,Q2_P35857,Q2_P22187,Q2_P27632,Q2_P17406,Q2_P34661
35341	416	66	Q2_P18006	NO	C800140.1	SJCHGC05961 protein [Schistosoma japonicum] ||	AGTAGTTCCCCGTTACTTAACTCTCAGACATTTAGTAGGCCACCCATAAGGGCCAAAAAA	0	C800140.1	Smp_140820			Plus / Plus	Plus / Plus	Sense	CAZ31140.1	Sp8 , putative [Schistosoma mansoni]
31659	373	39	Q2_P18007	NO	C800141.1	SJCHGC09182 protein [Schistosoma japonicum] ||PREDICTED: similar to U1 small nuclear ribonucleoprotein A (U1 snRNP protein A) (U1A protein) (U1-A) [Canis familiaris] ||small nuclear ribonucleoprotein polypeptide A (predicted) [Rattus norvegicus] gb|AAH86331.1| Small nuclear ribonucleoprotein polypeptide A (predicted) [Rattus norvegicus] ||nuclear ribonucleoprotein A [Oryctolagus cuniculus] ||PRED…	GTTCGTATGGTTCCAGGAAGACATGATATTGCTTTTGTTGAATTTGGTAATGAAGAAGGG	0	C800141.1	Smp_069870			Plus / Plus	Plus / Plus	Sense	CAZ34435.1	small nuclear ribonucleoprotein U)1a,U)2b, putative [Schistosoma mansoni]	2e-25	NP_004587	>gi|4759156|ref|NP_004587.1| small nuclear ribonucleoprotein polypeptide A [Homo sapiens]	Q2_P18007
32093	378	48	Q2_P18008	NO	C800142.1	SJCHGC03525 protein [Schistosoma japonicum] ||sentrin/SUMO-specific protease 1 [Homo sapiens] gb|AAF31171.1| sentrin/SUMO-specific protease [Homo sapiens] sp|Q9P0U3|SEN1_HUMAN Sentrin-specific protease 1 (Sentrin/SUMO-specific protease SENP1) ||PREDICTED: similar to Sentrin-specific protease 1 (Sentrin/SUMO-specific protease SENP1) [Canis familiaris] ||SUMO-specific protease U1p1 [Xenopus laevis]…	TTTTCCTGTGTACATTTGGTGAATTCATCTCTCGTGATGCTTCATTTACATTTAGTCAGG	0	C800142.1	Smp_033260.2			Plus / Plus	Plus / Plus	Sense	CAZ31001.1	family C48 unassigned peptidase (C48 family) [Schistosoma mansoni]	2.1e-58	NP_055369	>gi|7657550|ref|NP_055369.1| sentrin/SUMO-specific protease 1 [Homo sapiens]	Q2_P14784,Q2_P18008,Q2_P34700
2660	32	25	Q2_P18009	NO	C800143.1	protein disulfide isomerase homologue [Schistosoma mansoni] ||SJCHGC09060 protein [Schistosoma japonicum] ||protein disulphide isomerase [Fasciola hepatica] ||Hypothetical protein CBG14484 [Caenorhabditis briggsae] ||Protein disulfide isomerase protein 2 isoform a [Caenorhabditis elegans] ref|NP_508778.1| Protein Disulfide Isomerase family member (pdi-2) [Caenorhabditis elegans] sp|Q17770|PDI2_CA…	GCTATTTGACAGTGCATTTCCATGAAAGTGTTTCTCGAGTTTTCTTTTTGTACCATCTTA	0	C800143.1	Smp_056760			Plus / Plus	Plus / Plus	Sense	CAZ33205.1	protein disulfide-isomerase, putative [Schistosoma mansoni]	8e-120	NP_000909	>gi|20070125|ref|NP_000909.2| prolyl 4-hydroxylase, beta subunit precursor [Homo sapiens]
24208	285	68	Q2_P18010	NO	C800144.1	MGC68892 protein [Xenopus laevis] ||vav 2 oncogene [Homo sapiens] emb|CAI13723.1| vav 2 oncogene [Homo sapiens] emb|CAI15781.1| vav 2 oncogene [Homo sapiens] ||vav 2 oncogene [Homo sapiens] emb|CAI12280.1| vav 2 oncogene [Homo sapiens] emb|CAI13724.1| vav 2 oncogene [Homo sapiens] emb|CAI15782.1| vav 2 oncogene [Homo sapiens] ||Vav2 oncogene [Mus musculus] sp|Q60992|VAV2_MOUSE Vav-2 protein gb|AA…	ATCCACTTATCGGAGTTCTTTCGCACAATGAAATTGAAGAGATTTTCAAGTACATTGAGG	0	C800144.1	Smp_168370.1			Plus / Plus	Plus / Plus	Sense						Q2_P18010,Q2_P02618,Q2_P30999,Q2_P21276
25785	304	30	Q2_P18011	NO	C800145.1	SJCHGC04555 protein [Schistosoma japonicum] ||SJCHGC05650 protein [Schistosoma japonicum] ||PREDICTED: similar to Polypyrimidine tract-binding protein 1 (PTB) (Heterogeneous nuclear ribonucleoprotein I) (hnRNP I) (57 kDa RNA-binding protein PPTB-1) isoform 4 [Canis familiaris] ||polypyrimidine tract-binding protein [Sus scrofa] ref|NP_999396.1| polypyrimidine tract-binding protein [Sus scrofa] sp…	GCCTCAAGTATATCTGGTCCACAAGCTAATTTATTGAGAGCACAAGCAACAACACTATCT	0	C800145.1	Smp_142300			Plus / Plus	Plus / Plus	Sense	CAZ31320.1	polypyrimidine tract binding protein, putative [Schistosoma mansoni]	5.8e-75	NP_114367	>gi|14165464|ref|NP_114367.1| polypyrimidine tract-binding protein 1 isoform b [Homo sapiens]	Q2_P18011,Q2_P35257,Q2_P15334,Q2_P10493,Q2_P32915,Q2_P30271,Q2_P13068
22588	266	63	Q2_P18012	NO	C800146.1	none	GTCGGATGAACGGTTATGTGTTAATTTGTTCATTATCATGCAACATTTACATCAAGCTGT	0	C800146.1	Smp_132180			Plus / Plus	Plus / Plus	Sense	CAZ29491.1	expressed protein [Schistosoma mansoni]				Q2_P00045,Q2_P18012,Q2_P14016,Q2_P06539,Q2_P16549,Q2_P36842,Q2_P26122,Q2_P33890
31764	374	59	Q2_P18013	NO	C800147.1	CG8048-PB isoform B [Drosophila melanogaster] gb|AAF58011.1| CG8048-PA isoform A [Drosophila melanogaster] ref|NP_599140.1| CG8048-PB isoform B [Drosophila melanogaster] ref|NP_477266.1| CG8048-PA isoform A [Drosophila melanogaster] gb|AAM27505.1| LD12844p [Drosophila melanogaster] gb|AAL28586.1| HL07758p [Drosophila melanogaster] ||V-ATPase C subunit [Drosophila melanogaster] ||GA20788-PA [Droso…	TGATGGTCAGGAATAAACTAGTTCTGCAGCCCATTCCATTGTATTGATGTGATAATGCAA	0	C800147.1	Smp_162090			Plus / Plus	Plus / Plus	Sense	CAZ34796.1	subfamily S1B unassigned peptidase (S01 family) [Schistosoma mansoni]	4e-131	NP_001320	>gi|4557499|ref|NP_001320.1| C-terminal binding protein 2 isoform 1 [Homo sapiens]	Q2_P20265,Q2_P35633,Q2_P18013,Q2_P35961,Q2_P10720,Q2_P21825,Q2_P35786,Q2_P10420,Q2_P30507,Q2_P02717
1693	20	78	Q2_P18014	NO	C800148.1	SJCHGC03410 protein [Schistosoma japonicum] ||PREDICTED: similar to Protein KIAA0539 [Gallus gallus] ||	ATTCAATCGACATTGTCTTCAAAAGTTAACATCTCTGTATCAGTGGCGGGGGGAGGGTAA	0	C800148.1	Smp_157140.2			Plus / Plus	Plus / Plus	Sense	CAZ33970.1	expressed protein [Schistosoma mansoni]	3.9e-23	NP_055640	>gi|194394141|ref|NP_055640.2| nucleolar preribosomal-associated protein 1 [Homo sapiens]	Q2_P18014,Q2_P10265,Q2_P03618,Q2_P31768,Q2_P22937,Q2_P30043
34825	410	60	Q2_P18015	NO	C800149.1	none	TTCTTGTCCTACAAGTCCACCAAGTACAACATCGGACCCTGTGTTACCGCCACGACGTTC	0	C800149.1	Smp_161740			Plus / Plus	Plus / Plus	Sense	CAZ34712.1	expressed protein [Schistosoma mansoni]				Q2_P00046,Q2_P03872,Q2_P23225,Q2_P18015
8053	95	63	Q2_P18017	NO	C800151.1	SJCHGC07378 protein [Schistosoma japonicum] ||	TTTTCACAACCGATTAAACCACTTCCATGGTTGTATAATTCTACGATTTCTTCATCGAGT	0	C800151.1	Smp_123180			Plus / Plus	Plus / Plus	Sense	CAZ27904.1	nedd-4-like E3 ubiquitin-protein ligase [Schistosoma mansoni]	0.0	NP_008944	>gi|13654239|ref|NP_008944.1| WW domain containing E3 ubiquitin protein ligase 1 [Homo sapiens]	Q2_P02338,Q2_P21969,Q2_P31717,Q2_P11901,Q2_P18017
21708	256	33	Q2_P18018	NO	C800152.1	SJCHGC07512 protein [Schistosoma japonicum] ||	CAGACTAGGTGGATAACAGCTGGATCTAATCCTTTCATCAGCTTCAGTTTTTTAAATGAG	0	C800152.1	Smp_130000			Plus / Plus	Plus / Plus	Sense	CAZ29153.1	expressed protein [Schistosoma mansoni]	6.8e-28	NP_036546	>gi|19923790|ref|NP_036546.2| rab3 GTPase-activating protein, non-catalytic subunit [Homo sapiens]	Q2_P18018,Q2_P12697
34279	404	24	Q2_P18021	NO	C800155.1	PREDICTED: similar to Pcnx protein [Apis mellifera] ||unnamed protein product [Tetraodon nigroviridis] ||PREDICTED: similar to Pecanex-like protein 1 (Pecanex homolog) [Strongylocentrotus purpuratus] ||ENSANGP00000029021 [Anopheles gambiae str. PEST] ref|XP_559663.1| ENSANGP00000029021 [Anopheles gambiae str. PEST] ||ENSANGP00000005643 [Anopheles gambiae str. PEST] ref|XP_310432.2| ENSANGP0000000…	CGATCCACCAATTGGTTATCCAATTTATGTTAGTCCTTTAATTACTAGTTTTGCTGGTGA	0	C800155.1	Smp_130040			Plus / Plus	Plus / Plus	Sense	CAZ29157.1	pecanex-related protein [Schistosoma mansoni]	0.0	NP_055797	>gi|126723564|ref|NP_055797.2| pecanex-like 1 [Homo sapiens]	Q2_P18021,Q2_P20221,Q2_P00451,Q2_P18793,Q2_P13957,Q2_P28330,Q2_P08622,Q2_P30105,Q2_P10330,Q2_P30918,Q2_P27892,Q2_P08205,Q2_P16452,Q2_P25975,Q2_P01393,Q2_P33829
23246	274	41	Q2_P18022	NO	C800156.1	SJCHGC01145 protein [Schistosoma japonicum] ||unknown [Schistosoma japonicum] ||MGC84453 protein [Xenopus laevis] ||hypothetical protein LOC548885 [Xenopus tropicalis] ||	CCCGGATCCTGCGTATATCAAATAGAAACACTGATAAGGACCAGTGACACTATTTTCTTA	0	C800156.1	Smp_071590			Plus / Plus	Plus / Plus	Sense	CAZ34586.1	TBX2 protein , putative [Schistosoma mansoni]				Q2_P18022,Q2_P13302
23670	279	40	Q2_P18023	NO	C800157.1	Unknown (protein for MGC:114980) [Xenopus laevis] ||sister chromatid cohesion protein Pds5B [Xenopus laevis] ||LOC495695 protein [Xenopus laevis] ||unnamed protein product [Tetraodon nigroviridis] ||hypothetical protein [Homo sapiens] ||	CGTTCTCAGGCTTATGTTGAATGTATTGAAATTGGCTGGTATTTGTCAATGAGCTATATA	0	C800157.1	Smp_137790			Plus / Plus	Plus / Plus	Sense	CAZ30571.1	androgen induced inhibitor of proliferation (as3) / pds5-related [Schistosoma mansoni]	9.6e-65	NP_055847	>gi|7657269|ref|NP_055847.1| PDS5, regulator of cohesion maintenance, homolog B [Homo sapiens]	Q2_P18023
25385	299	55	Q2_P00050	NO	C800158.1	CG1484-PA [Drosophila melanogaster] ref|NP_525097.1| CG1484-PA [Drosophila melanogaster] gb|AAD34772.1| unknown [Drosophila melanogaster] sp|Q24020|FLII_DROME Flightless-I protein gb|AAC03566.1| flightless-I [Drosophila melanogaster] prf||2001494A fli protein ||flightless [Drosophila melanogaster] prf||2202222A flightless I gene ||ENSANGP00000015009 [Anopheles gambiae str. PEST] ref|XP_309356.2| …	ACCTGCTACCGATCTTCGAGCATTATTAGCACCTAGAGAAACACCACTTACTAATGAAGA	0	C800158.1	Smp_165930			Plus / Minus	Plus / Minus	Sense	CAZ35461.1	flightless-I, putative [Schistosoma mansoni]	0.0	NP_002009	>gi|4503743|ref|NP_002009.1| flightless I homolog [Homo sapiens]	Q2_P16584,Q2_P36883,Q2_P00050,Q2_P30369,Q2_P10367,Q2_P30145,Q2_P10592,Q2_P01309
28092	331	42	Q2_P18024	NO	C800159.1	none	GGCTATACGCCATGCATTAGCTGAATGTTTTCCAAATAATGTACAATTACATATTCAAGG	0	C800159.1	Smp_145470			Plus / Plus	Plus / Plus	Sense	CAZ31886.1	zinc finger protein, putative [Schistosoma mansoni]				Q2_P00051,Q2_P40510,Q2_P18024
42498	500	83	Q2_P18025	NO	C800160.1	SJCHGC09220 protein [Schistosoma japonicum] ||PREDICTED: similar to zinc finger protein ZFP235 [Rattus norvegicus] ||PREDICTED: similar to zinc finger protein 91 (HPF7 HTF10) [Pan troglodytes] ||zinc finger protein 214 [Homo sapiens] gb|AAF00004.1| BWSCR2 associated zinc-finger protein BAZ1 [Homo sapiens] sp|Q9UL59|ZN214_HUMAN Zinc finger protein 214 (BWSCR2 associated zinc-finger protein 1) (BAZ…	GTTATAATTGTGGTATTTGTGGAATCGCATTCCAGCACGCTGCCGATATGCGTCAACATA	0	C800160.1	Smp_160440			Plus / Plus	Plus / Plus	Sense	CAZ34480.1	zinc finger protein, putative [Schistosoma mansoni]	1e-42	NP_001073878	>gi|122937213|ref|NP_001073878.1| zinc finger protein 99 [Homo sapiens]	Q2_P36027,Q2_P06145,Q2_P18025
28074	331	24	Q2_P18026	NO	C800161.1	6-phosphofructokinase (Phosphofructokinase) (Phosphohexokinase) gb|AAA29911.1| phosphofructokinase ||CG4001-PB isoform B [Drosophila melanogaster] ref|NP_724890.1| CG4001-PB isoform B [Drosophila melanogaster] sp|P52034|K6PF_DROME 6-phosphofructokinase (Phosphofructokinase) (Phosphohexokinase) ||ENSANGP00000025715 [Anopheles gambiae str. PEST] ref|XP_564589.1| ENSANGP00000025715 [Anopheles gambia…	CAGTCATTTTAACCTTTCAAAACCAACACCGATCGCCTTTACTATAGTTGTAGAAAATGA	0	C800161.1	Smp_043670.1			Plus / Plus	Plus / Plus	Sense	CAZ31940.1	6-phosphofructokinase [Schistosoma mansoni]	0.0	NP_000280	>gi|4505749|ref|NP_000280.1| phosphofructokinase, muscle [Homo sapiens]
42023	495	33	Q2_P18027	NO	C800162.1	none	TTTACGTTCAGCTGTTGGATTTCAACAAGTAACAAGGGTTACGCGCATATCCGCCATTCC	0	C800162.1	Smp_161360			Plus / Plus	Plus / Plus	Sense	CAZ34648.1	syndecan, putative [Schistosoma mansoni]				Q2_P33081,Q2_P13225,Q2_P00052,Q2_P37841,Q2_P09870,Q2_P29607,Q2_P18027
36305	428	10	Q2_P18028	NO	C800163.1	none	GGAGCGGTAGCAGCATACGTTTTTTACCATTTCTATGGTTAAAATATATGAAGAGGATTT	0	C800163.1	Smp_176020			Plus / Plus	Plus / Plus	Sense	CAY17799.1	hypothetical protein [Schistosoma mansoni]
30966	365	26	Q2_P18030	NO	C800165.1	src tyrosine kinase [Schistosoma mansoni] ||	CTACAGAAGGGCAGTTTGTTGCTTTACATGATTATGTTAAACGTGTAGATGATGATTTGA	0	C800165.1	Smp_151300			Plus / Plus	Plus / Plus	Sense	CAZ32981.1	proto-oncogene tyrosine-protein kinase src, putative [Schistosoma mansoni]	9.9e-46	NP_002028	>gi|4503823|ref|NP_002028.1| protein-tyrosine kinase fyn isoform a [Homo sapiens]	Q2_P27960,Q2_P18030
44562	525	22	Q2_P18031	NO	C800166.1	SJCHGC06601 protein [Schistosoma japonicum] ||SJCHGC02393 protein [Schistosoma japonicum] ||	AATCCCCACAGCCCACAAGAACAGCTCTTTAGGCTTCAGGATATGGTGAGCGCCCGCAAG	0	C800166.1	Smp_035360			Plus / Plus	Plus / Plus	Sense	CAZ39232.1	expressed protein [Schistosoma mansoni]				Q2_P18031,Q2_P41543,Q2_P26484,Q2_P40808,Q2_P39018
35362	417	2	Q2_P18032	NO	C800167.1	SJCHGC07218 protein [Schistosoma japonicum] ||unknown [Schistosoma mansoni] ||PREDICTED: similar to ubiquitin specific protease 38 isoform 4 [Canis familiaris] ||CG7023-PB isoform B [Drosophila melanogaster] ref|NP_651099.1| CG7023-PB isoform B [Drosophila melanogaster] gb|AAQ23553.1| RE52890p [Drosophila melanogaster] ||unnamed protein product [Kluyveromyces lactis] emb|CAG99081.1| unnamed prote…	GCCTTATCTCTTACTGTACAGTCAAACTTAGACATATAGTTCACATATCTATTCCTGTCA	0	C800167.1	Smp_083530.1			Plus / Plus	Plus / Plus	Sense	CAZ35691.1	calpain-7 (C02 family) [Schistosoma mansoni]	0.0	NP_055111	>gi|7656959|ref|NP_055111.1| calpain 7 [Homo sapiens]	Q2_P18032
41840	493	20	Q2_P18033	NO	C800168.1	unknown [Schistosoma japonicum] ||unknown [Schistosoma japonicum] ||SJCHGC00516 protein [Schistosoma japonicum] ||SJCHGC06906 protein [Schistosoma japonicum] ||troponin I [Mizuhopecten yessoensis] ||	AAGAACATATTAACCGCATGGAATCCTTTTAAGTTGGCTATTGCATTTTTCGGTTGGCTT	0	C800168.1	Smp_177420			Plus / Plus	Plus / Plus	Sense	CAZ37098.1	hypothetical protein [Schistosoma mansoni]
24973	294	68	Q2_P18034	NO	C800169.1	serpin ||serine protease inhibitor ||serine protease inhibitor serpin [Schistosoma japonicum] ||serpin [Schistosoma japonicum] ||serpin ||	AACATTGAAATCTATGGGTATTGTCGATTTGTTTAATCCAGTAGCAGCTAATCTATCAGG	0	C800169.1	Smp_090080			Plus / Plus	Plus / Plus	Sense	CAZ36265.1	serpin [Schistosoma mansoni]	1.4e-34	NP_002965	>gi|28076869|ref|NP_002965.1| serine (or cysteine) proteinase inhibitor, clade B (ovalbumin), member 4 [Homo sapiens]	Q2_P18034,Q2_P32872
25179	297	19	Q2_P18035	NO	C800171.1	none	TATGATGAGAGAAAAACAATCAACAACTTTAAGAGATACTTCCACTTCGCCGATACATTC	0	C800171.1	Smp_049740			Plus / Plus	Plus / Plus	Sense	CAZ32516.1	hypothetical protein [Schistosoma mansoni]				Q2_P34488,Q2_P18035,Q2_P14584
42001	495	11	Q2_P18037	NO	C800173.1	SJCHGC04636 protein [Schistosoma japonicum] ||	GCTAATGTTAAAACTGAAAGTGAGAATTTGAATCCTCTTAGAGTATCTGCGATCATATGC	0	C800173.1	Smp_102410			Plus / Plus	Plus / Plus	Sense	CAY18000.1	expressed protein [Schistosoma mansoni]				Q2_P18037,Q2_P00680
2993	36	18	Q2_P18038	NO	C800174.1	none	GATCACGATAGTTCGTCGGTCTTAAATTGTGATTACCGAAGAATAATGTTGTCATTTGAG	0	C800174.1	Smp_125550			Plus / Plus	Plus / Plus	Sense	CAZ28331.1	expressed protein [Schistosoma mansoni]	3e-102	NP_065880	>gi|75832029|ref|NP_065880.1| connexin 43-interacting protein 150 isoform a [Homo sapiens]	Q2_P31894,Q2_P05996,Q2_P21467,Q2_P12306,Q2_P32111,Q2_P18038,Q2_P00058,Q2_P30432,Q2_P10652,Q2_P30837,Q2_P11047,Q2_P27503,Q2_P07879,Q2_P27815,Q2_P04598,Q2_P24120,Q2_P12080
7130	84	75	Q2_P00059	NO	C800175.1	SJCHGC01105 protein [Schistosoma japonicum] ||	TCATTTTGTCCATCGACTCGATTGTCCAACAAGCGGTTTAATATGCATTGCTTATGATAC	0	C800175.1	Smp_101330			Plus / Minus	Plus / Minus	Sense	CAZ37190.1	ribosomal pseudouridine synthase, putative [Schistosoma mansoni]	5.1e-28	NP_478072	>gi|17158025|ref|NP_478072.1| RNA pseudouridylate synthase domain containing 1 [Homo sapiens]	Q2_P09484,Q2_P00059
4214	50	49	Q2_P18040	NO	C800178.1	SJCHGC03849 protein [Schistosoma japonicum] ||PREDICTED: similar to vacuolar protein sorting 16 isoform 1 [Strongylocentrotus purpuratus] ||unnamed protein product [Tetraodon nigroviridis] ||MGC89386 protein [Xenopus tropicalis] ref|NP_001004976.1| MGC89386 protein [Xenopus tropicalis] ||PREDICTED: similar to vacuolar protein sorting 16 isoform 1 [Apis mellifera] ||	CTAATTCAGCTGTTGTACTTCAATGGAATAATTTAATTGCTATTATCAGTGCACAGTCCG	0	C800178.1	Smp_123510			Plus / Plus	Plus / Plus	Sense	CAZ27957.1	vacuolar protein sorting vps16, putative [Schistosoma mansoni]	2.4e-97	NP_072097	>gi|17978479|ref|NP_072097.2| vacuolar protein sorting 16 isoform 1 [Homo sapiens]	Q2_P27417,Q2_P18040
40414	476	39	Q2_P18043	NO	C800182.1	none	CCATAAGAAGAGAATAAAACCTCCAGGACGATTGAAAGATTTCAATGGAGCTTTGTTTTT	0	C800182.1	Smp_156600			Plus / Plus	Plus / Plus	Sense	CAZ33896.1	hypothetical protein [Schistosoma mansoni]
737	9	57	Q2_P00065	NO	C800184.1	SJCHGC05133 protein [Schistosoma japonicum] ||SJCHGC08279 protein [Schistosoma japonicum] ||	GTGAACTTTGTGGTCGGTCATTCAATTCACATTGTGCATTACGTTATCATTCTAATATTG	0	C800184.1	Smp_094640			Plus / Minus	Plus / Minus	Sense	CAY17699.1	zinc finger protein, putative [Schistosoma mansoni]	6.4e-21	XP_002343677	>gi|239746221|ref|XP_002343677.1| PREDICTED: hypothetical protein XP_002343677 [Homo sapiens]	Q2_P00065,Q2_P27187,Q2_P17077
38353	452	18	Q2_P18045	NO	C800185.1	SJCHGC05501 protein [Schistosoma japonicum] ||PREDICTED: similar to Exosome complex exonuclease RRP40 (Ribosomal RNA processing protein 40) (Exosome component 3) (p10) [Strongylocentrotus purpuratus] ||PREDICTED: similar to Exosome complex exonuclease RRP40 (Ribosomal RNA processing protein 40) (Exosome component 3) (p10) [Canis familiaris] ||Unknown (protein for MGC:127537) [Bos taurus] ||PREDIC…	GCAATAGCCATTGCTGAACATATATCAGCTAGTGAATGTTGTCAATTAGCTAAAGAACTT	0	C800185.1	Smp_194600			Plus / Plus	Plus / Plus	Sense	CAZ39100.1	mitochondrial carrier protein-related [Schistosoma mansoni]	1.7e-43	NP_077008	>gi|48476342|ref|NP_077008.2| solute carrier family 25, member 23 [Homo sapiens]	Q2_P41564,Q2_P33312,Q2_P15144,Q2_P07089,Q2_P18045,Q2_P26729,Q2_P35062
23722	280	7	Q2_P18046	NO	C800186.1	none	CACTTGAAACAATAATAACTACTACAACACCAGCCATGACTAATGAATTTCCAATGCCTA	0	C800186.1	Smp_143510			Plus / Plus	Plus / Plus	Sense	CAZ31525.1	cut-like 1 (ctl1) [Schistosoma mansoni]				Q2_P21286,Q2_P02247,Q2_P18046,Q2_P11691,Q2_P30519,Q2_P23211,Q2_P03860,Q2_P10730
32748	386	23	Q2_P00066	NO	C800187.1	unknown [Schistosoma mansoni] ||SJCHGC03840 protein [Schistosoma japonicum] ||SJCHGC02755 protein [Schistosoma japonicum] ||hypothetical protein DDB0205464 [Dictyostelium discoideum] gb|EAL68399.1| hypothetical protein DDB0205464 [Dictyostelium discoideum] ||proteoglycan 4 [Homo sapiens] emb|CAC36090.1| proteoglycan 4 [Homo sapiens] ||	CAGGCTTTTCTCAATACCTAAATTGCTGAGTATTGCTTCTCAAAAGGAGAGTATTATTAC	0	C800187.1	Smp_124000			Plus / Minus	Plus / Minus	Sense	CAZ28038.1	hypothetical protein [Schistosoma mansoni]
28917	341	17	Q2_P18047	NO	C800188.1	SJCHGC07180 protein [Schistosoma japonicum] ||hypothetical protein LOC234582 [Mus musculus] dbj|BAE38329.1| unnamed protein product [Mus musculus] ||ENSANGP00000017857 [Anopheles gambiae str. PEST] ref|XP_308480.2| ENSANGP00000017857 [Anopheles gambiae str. PEST] ||Hypothetical protein LOC325319 [Danio rerio] ref|NP_991115.1| hypothetical protein LOC325319 [Danio rerio] ||CG31638-PA [Drosophila m…	CTGGAATTGTCGTCAACAATCCGTTGGTGGAAGAATCAATGTATGAATTTAGAACAGGAG	0	C800188.1	Smp_155410			Plus / Plus	Plus / Plus	Sense	CAZ33692.1	conserved hypothetical protein [Schistosoma mansoni]				Q2_P18047
40773	480	58	Q2_P00067	NO	C800189.1	SJCHGC02482 protein [Schistosoma japonicum] ||SJCHGC02483 protein [Schistosoma japonicum] ||PREDICTED: similar to CG14985-PA isoform 1 [Bos taurus] ||PREDICTED: similar to Y66D12A.10 isoform 5 [Bos taurus] ||PREDICTED: similar to hypothetical protein BC018453 [Gallus gallus] ||	CTTGACGGCTTCAAACCTACAACATTTCGATAACTTTCCATTTTCATTAGTCTTTCATCT	0	C800189.1	Smp_042060			Plus / Minus	Plus / Minus	Sense	CAZ31785.1	conserved hypothetical protein [Schistosoma mansoni]	3.2e-50	NP_620153	>gi|20270349|ref|NP_620153.1| MIT, microtubule interacting and transport, domain containing 1 [Homo sapiens]
19978	236	3	Q2_P18048	NO	C800190.1	none	GAACAACAGATGAAAACGAATGAGATGGATAATTATGGTGAAGAAAGCGTTGATTTTGAC	0	C800190.1	Smp_155970			Plus / Plus	Plus / Plus	Sense	CAZ33795.1	twik family of potassium channels-related [Schistosoma mansoni]	2e-70	NP_002237	>gi|4504849|ref|NP_002237.1| potassium channel, subfamily K, member 3 [Homo sapiens]	Q2_P00068,Q2_P18048
31766	374	61	Q2_P18049	NO	C800191.1	SJCHGC02540 protein [Schistosoma japonicum] ||	GTAATTTTGTGGATGATAAATGGTTTGGTCCATTGCCAAAATGGATTCTTGATTTGAAGC	0	C800191.1	Smp_013810			Plus / Plus	Plus / Plus	Sense	CAZ29085.1	expressed protein [Schistosoma mansoni]				Q2_P18049
36039	424	84	Q2_P18050	NO	C800192.1	SJCHGC08734 protein [Schistosoma japonicum] ||	AACATATCTATGATACTGTACCATTTTCATCGTCATCTTCTCGATCGTCATCATCATCAT	0	C800192.1	Smp_155120			Plus / Plus	Plus / Plus	Sense	CAZ33648.1	synaptic ras gtpase activating protein, syngap, putative [Schistosoma mansoni]	1.9e-57	NP_004832	>gi|4758808|ref|NP_004832.1| RAS protein activator like 2 isoform 1 [Homo sapiens]	Q2_P01066,Q2_P18050,Q2_P32700,Q2_P12876
35969	424	14	Q2_P18051	NO	C800193.1	SJCHGC08898 protein [Schistosoma japonicum] ||	GCCGGATGAAAACGAACTGTGTCAAGAAGAACATAACTCCTCAATAATATCTAGTTTAAA	0	C800193.1	Smp_153860.2			Plus / Plus	Plus / Plus	Sense	CAZ33418.1	expressed protein [Schistosoma mansoni]				Q2_P39694,Q2_P18051,Q2_P38551
18433	217	73	Q2_P00069	NO	C800194.1	SJCHGC06121 protein [Schistosoma japonicum] ||Ard1 protein [Mus musculus] dbj|BAC25266.1| unnamed protein product [Mus musculus] ||unnamed protein product [Mus musculus] ||N-acetyltransferase homolog of S. cerevisiae ARD1 [Homo sapiens] gb|AAH19312.1| N-acetyltransferase homolog of S. cerevisiae ARD1 [Homo sapiens] gb|AAH00308.1| N-acetyltransferase homolog of S. cerevisiae ARD1 [Homo sapiens] sp…	TACGCTGACGGTGAGGATGCCTACGCTATGAAAAGGGATCTTAAGACATTATGGGACAAA	0	C800194.1	Smp_050590			Plus / Minus	Plus / Minus	Sense	CAZ32603.1	n-terminal acetyltransferase complex ard1 subunit, putative [Schistosoma mansoni]	4.3e-71	NP_003482	>gi|10835057|ref|NP_003482.1| alpha-N-acetyltransferase 1A [Homo sapiens]	Q2_P00069
4645	55	55	Q2_P18052	NO	C800195.1	SJCHGC05279 protein [Schistosoma japonicum] ||ENSANGP00000019640 [Anopheles gambiae str. PEST] ref|XP_318539.2| ENSANGP00000019640 [Anopheles gambiae str. PEST] ||PREDICTED: similar to CG14480-PA isoform 1 [Canis familiaris] ||Unknown (protein for MGC:65774) [Danio rerio] ref|NP_956218.1| hypothetical protein LOC334752 [Danio rerio] ||Nip30-prov protein [Xenopus laevis] ||	CGTGGATAATGACTAAAATTTGTCCAAGCAATGTTTTCTGATGTACAGTATAACGCGAAA	0	C800195.1	Smp_141820.1			Plus / Plus	Plus / Plus	Sense						Q2_P02732,Q2_P21842,Q2_P37851,Q2_P17418,Q2_P18052
40745	480	30	Q2_P18054	NO	C800197.1	unnamed protein product [Tetraodon nigroviridis] ||bromodomain and WD repeat domain containing 2 [Homo sapiens] emb|CAH72488.1| WD repeat domain 11 [Homo sapiens] gb|AAH71564.1| Bromodomain and WD repeat domain containing 2 [Homo sapiens] gb|AAH40469.1| Bromodomain and WD repeat domain containing 2 [Homo sapiens] gb|AAK08064.1| WD40 repeat domain 11 protein [Homo sapiens] sp|Q9BZH6|WDR11_HUMAN WD…	CATAAGAGCAAAATTTCGTTTTCCGAGAGGATTTGACGTGGAAAGCATAGCTAGAGACTG	0	C800197.1	Smp_137210			Plus / Plus	Plus / Plus	Sense	CAZ30446.1	expressed protein [Schistosoma mansoni]	5e-51	NP_060587	>gi|13324688|ref|NP_060587.8| bromodomain and WD repeat domain containing 2 [Homo sapiens]	Q2_P18054,Q2_P15074,Q2_P34994,Q2_P17043,Q2_P01602,Q2_P41208,Q2_P37403,Q2_P35626
39545	466	20	Q2_P18055	NO	C800198.1	similar to hypothetical protein MGC4614 in Homo sapiens hypothetical protein MGC4614 in Homo sapiens [Schistosoma japonicum] ||SJCHGC09250 protein [Schistosoma japonicum] ||Unknown (protein for MGC:130859) [Xenopus laevis] ||unnamed protein product [Tetraodon nigroviridis] ||hypothetical protein [Gallus gallus] ref|NP_001026090.1| hypothetical protein LOC419902 [Gallus gallus] ||	GGATCCAACTGTGATAGTATCTCCGTGTTTAACCTTCAAACTTGTCCATAATACTTATTT	0	C800198.1	Smp_064030			Plus / Plus	Plus / Plus	Sense	CAZ33911.1	expressed protein [Schistosoma mansoni]
26633	314	28	Q2_P18056	NO	C800199.1	Hypothetical protein C49F8.2 [Caenorhabditis elegans] ref|NP_510225.2| C49F8.2 [Caenorhabditis elegans] ||SJCHGC04469 protein [Schistosoma japonicum] ||Hypothetical protein CBG14568 [Caenorhabditis briggsae] ||CG3456-PA [Drosophila melanogaster] emb|CAA15693.1| EG:103B4.3 [Drosophila melanogaster] ref|NP_477334.2| CG3456-PA [Drosophila melanogaster] gb|AAQ22471.1| RE29708p [Drosophila melanogaste…	ATTGATCCAGATGCACCTGTTGTACCAGCAGAAAAAGTTGAAACAGGTAAATCAAAACGA	0	C800199.1	Smp_150340			Plus / Plus	Plus / Plus	Sense	CAZ32799.1	monocarboxylate transporter, putative [Schistosoma mansoni]				Q2_P18056,Q2_P09862,Q2_P23677,Q2_P39522,Q2_P04220,Q2_P29595
11319	134	14	Q2_P00071	NO	C800200.1	SJCHGC09499 protein [Schistosoma japonicum] ||PREDICTED: similar to Eukaryotic translation initiation factor 4B (eIF-4B) [Pan troglodytes] ||hypothetical protein UM06090.1 [Ustilago maydis 521] gb|EAK86913.1| hypothetical protein UM06090.1 [Ustilago maydis 521] ||sce3 [Schizosaccharomyces pombe] emb|CAA03989.1| putative RNA-binding protein [Schizosaccharomyces pombe] ref|NP_595728.1| hypothetical…	CGACTGACCAAACTAGTGTCTTTTCTACTAATCTTTAAACTCTCTGTATTCTAATGTTCC	0	C800200.1	Smp_079490			Plus / Minus	Plus / Minus	Sense	CAZ35315.1	eukaryotic translation initiation factor 4b/4h, putative [Schistosoma mansoni]				Q2_P07809,Q2_P00071
44754	527	44	Q2_P18057	NO	C800201.1	PREDICTED: similar to Ribonucleases P/MRP protein subunit POP1 (hPOP1) partial [Gallus gallus] ||unnamed protein product [Mus musculus] ref|NP_080616.1| processing of precursors 1 homolog isoform 2 [Mus musculus] ||Pop1 protein [Mus musculus] ref|NP_690854.1| processing of precursors 1 homolog isoform 1 [Mus musculus] ||PREDICTED: similar to Ribonucleases P/MRP protein subunit POP1 (hPOP1) isofor…	AAAGATATTTCTCGTCCAGTACTTGGACCTGTTCGTATTCTGTGGGGTTCATTAAATTCA	0	C800201.1	Smp_084810			Plus / Plus	Plus / Plus	Sense	CAZ35819.1	conserved hypothetical protein [Schistosoma mansoni]	8.6e-31	NP_055844	>gi|225007648|ref|NP_055844.2| processing of precursor 1 [Homo sapiens]	Q2_P18057,Q2_P20599,Q2_P01704
39677	467	67	Q2_P00072	NO	C800202.1	PREDICTED: similar to Filamin A (Alpha-filamin) (Filamin 1) (Endothelial actin-binding protein) (Actin-binding protein 280) (ABP-280) (Nonmuscle filamin) isoform 11 [Canis familiaris] ||PREDICTED: similar to Filamin A (Alpha-filamin) (Filamin 1) (Endothelial actin-binding protein) (Actin-binding protein 280) (ABP-280) (Nonmuscle filamin) isoform 1 [Canis familiaris] ||PREDICTED: similar to Filami…	CATACACGCACACACACATACACTTTTACGTATTAAGTTCAATCTTTTTCTGTCTATTCC	0	C800202.1	Smp_156590			Plus / Minus	Plus / Minus	Sense	CAZ33895.1	filamin-related [Schistosoma mansoni]	6.7e-36	NP_001447	>gi|116063573|ref|NP_001447.2| filamin A, alpha isoform 1 [Homo sapiens]
5237	62	52	Q2_P18058	NO	C800203.1	SJCHGC06067 protein [Schistosoma japonicum] ||	CGTAGACAACTCCATACCGGTGGTCGCATTTGGTTGTCGCGTGCCAGTAGCCTCACTAAA	0	C800203.1	Smp_174240.2			Plus / Plus	Plus / Plus	Sense	CAZ36645.1	expressed protein [Schistosoma mansoni]				Q2_P20118,Q2_P25607,Q2_P18058
41099	484	44	Q2_P18059	NO	C800204.1	SJCHGC05795 protein [Schistosoma japonicum] ||PREDICTED: similar to ENSANGP00000010053 [Apis mellifera] ||ENSANGP00000010053 [Anopheles gambiae str. PEST] ref|XP_317696.2| ENSANGP00000010053 [Anopheles gambiae str. PEST] ||CG9003-PA [Drosophila melanogaster] ref|NP_610689.1| CG9003-PA [Drosophila melanogaster] ||LD12638p [Drosophila melanogaster] ||	AAACACACTGGTATTATCACACTGTGATCAAGTGACTGATGAAGGTATTGCACGTTTAGC	0	C800204.1	Smp_097020.4			Plus / Plus	Plus / Plus	Sense						Q2_P18059
25662	302	77	Q2_P18060	NO	C800205.1	SJCHGC09308 protein [Schistosoma japonicum] ||similar to XM_029844 adenylyl cyclase-associated protein in Homo sapiens [Schistosoma japonicum] ||unnamed protein product [Macaca fascicularis] ||Unknown (protein for MGC:127425) [Bos taurus] ||PREDICTED: similar to CAP adenylate cyclase-associated protein 1 isoform 2 [Bos taurus] ||	GTACCAGCACAACATTTTTGTCCAAGCGCAATAAAAAACTGCTTTTTTGATAGTGATATG	0	C800205.1	Smp_014010			Plus / Plus	Plus / Plus	Sense	CAZ29102.1	adenylyl cyclase-associated protein, putative [Schistosoma mansoni]	6e-102	NP_006358	>gi|5453595|ref|NP_006358.1| adenylyl cyclase-associated protein [Homo sapiens]
4419	52	84	Q2_P18061	NO	C800206.1	SJCHGC04035 protein [Schistosoma japonicum] ||	CTCCTACAATCTTCAGTATACAAAATATAGAATGCTCGTTGATTGTGTTACGCATACTTC	0	C800206.1	Smp_041190.1			Plus / Plus	Plus / Plus	Sense	CAZ31706.1	expressed protein [Schistosoma mansoni]	5.3e-21	NP_002531	>gi|24430181|ref|NP_002531.3| outer dense fiber of sperm tails 2 isoform 1 [Homo sapiens]
25000	295	10	Q2_P18062	NO	C800207.1	SJCHGC03927 protein [Schistosoma japonicum] ||	GATGAAAGTAGAAGATGACAGTGTATTTTCATCGTTCACGCAGTATGGTTAGAAGAAAAA	0	C800207.1	Smp_170310			Plus / Plus	Plus / Plus	Sense	CAZ36123.1	Spectrin beta chain, brain 4 (Spectrin, non-erythroid beta chain 4) (Beta-V spectrin) (BSPECV), putative [Schistosoma mansoni]	1.3e-99	NP_003118	>gi|154759259|ref|NP_003118.2| spectrin, alpha, non-erythrocytic 1 (alpha-fodrin) isoform 2 [Homo sapiens]
42709	503	39	Q2_P18063	NO	C800208.1	SJCHGC03817 protein [Schistosoma japonicum] ||hypothetical protein DDB0219651 [Dictyostelium discoideum] gb|EAL61877.1| hypothetical protein DDB0219651 [Dictyostelium discoideum] ||Hypothetical protein CBG02855 [Caenorhabditis briggsae] ||Hypothetical protein F54D5.1 [Caenorhabditis elegans] ref|NP_496475.3| PhytoChelatin Synthase family member (pcs-1) [Caenorhabditis elegans] gb|AAK62992.1| phyt…	ACCATTACCTCGTCATTGCATTCCTTTTAGTTCTCCTGAAGGAAAACACATATTTCGCGA	0	C800208.1	Smp_072740			Plus / Plus	Plus / Plus	Sense	CAY17110.1	family C83 unassigned peptidase (C83 family) [Schistosoma mansoni]				Q2_P18063,Q2_P37452,Q2_P15866,Q2_P36134
22228	262	43	Q2_P18064	NO	C800209.1	none	CAGGAATTCGATTGTAGTGGACATTTTCTGTACAAATAAGGCTTAAAATATCATCCACCT	0	C800209.1	Smp_052710			Plus / Plus	Plus / Plus	Sense	CAZ32807.1	expressed protein [Schistosoma mansoni]
21776	257	16	Q2_P18065	NO	C800210.1	hypothetical protein [Gallus gallus] ref|NP_001026576.1| similar to Coatomer protein complex subunit alpha [Gallus gallus] ||PREDICTED: similar to Coatomer alpha subunit (Alpha-coat protein) (Alpha-COP) (HEPCOP) (HEP-COP) isoform 2 [Bos taurus] ||PREDICTED: similar to Coatomer alpha subunit (Alpha-coat protein) (Alpha-COP) (HEPCOP) (HEP-COP) isoform 14 [Bos taurus] ||PREDICTED: similar to Coatome…	GGAATCGCTGTCGCTTGGATTGGTCGTAATAGATTCGCAGTTTTGGAAAGTTCTGGATCA	0	C800210.1	Smp_142910			Plus / Plus	Plus / Plus	Sense	CAZ31414.1	coatomer alpha subunit, putative [Schistosoma mansoni]	0.0	NP_004362	>gi|148536853|ref|NP_004362.2| coatomer protein complex, subunit alpha isoform 2 [Homo sapiens]	Q2_P18065
13025	154	20	Q2_P18066	NO	C800211.1	none	GGAATTAAGAATGTCAGTTGGATTATGTATGCCTAATACTTGTACTAGTGAAGAGGTTAG	0	C800211.1	Smp_162060			Plus / Plus	Plus / Plus	Sense	CAZ34789.1	expressed protein [Schistosoma mansoni]				Q2_P18066,Q2_P10885,Q2_P15979,Q2_P00074
18227	215	37	Q2_P00075	NO	C800212.1	PREDICTED: similar to ENSANGP00000013511 partial [Apis mellifera] ||ENSANGP00000013511 [Anopheles gambiae str. PEST] ref|XP_315931.2| ENSANGP00000013511 [Anopheles gambiae str. PEST] ||CG7915-PB isoform B [Drosophila melanogaster] ref|NP_729327.1| CG7915-PB isoform B [Drosophila melanogaster] gb|AAL68207.1| GH20978p [Drosophila melanogaster] ||CG7915-PA isoform A [Drosophila melanogaster] ref|NP_…	GTTTTCCATAGTCATCTTACTTTGCATTTTTCTAACTTCATTTCCCTCCCTCTTATATCC	0	C800212.1	Smp_012780			Plus / Minus	Plus / Minus	Sense	CAZ28976.1	sarm1, putative [Schistosoma mansoni]	7e-100	NP_055892	>gi|154090976|ref|NP_055892.2| sterile alpha and TIR motif containing 1 [Homo sapiens]
44594	525	54	Q2_P18067	NO	C800213.1	SJCHGC09388 protein [Schistosoma japonicum] ||eukaryotic translation initiation factor 3 subunit 8 [Danio rerio] gb|AAH57465.1| Eukaryotic translation initiation factor 3 subunit 8 [Danio rerio] ||PREDICTED: similar to ENSANGP00000017513 [Apis mellifera] ||unnamed protein product [Tetraodon nigroviridis] ||PREDICTED: similar to eukaryotic translation initiation factor 3 subunit 8 110kDa [Canis fa…	GACTTGATGCTTATGTCTGATTTGCAAATGTCAATTGAACATGCTGACCAGTCAACTATG	0	C800213.1	Smp_000480			Plus / Plus	Plus / Plus	Sense	CAZ27744.1	eukaryotic translation initiation factor 3 subunit 8 [Schistosoma mansoni]	2e-167	NP_003743	>gi|4503525|ref|NP_003743.1| eukaryotic translation initiation factor 3, subunit C [Homo sapiens]	Q2_P18067,Q2_P09961,Q2_P29710
32717	385	77	Q2_P18069	NO	C800215.1	Cdk7 protein [Mus musculus] dbj|BAE26631.1| unnamed protein product [Mus musculus] dbj|BAE40231.1| unnamed protein product [Mus musculus] sp|Q03147|CDK7_MOUSE Cell division protein kinase 7 (CDK-activating kinase) (CAK) (TFIIH basal transcription factor complex kinase subunit) (39 kDa protein kinase) (P39 Mo15) (Protein-tyrosine kinase MPK-7) (CR4 protein kinase) (CRK4) gb|AAA64831.1| MO15-associ…	CCAGGCATACCATTCTCACAGATATTTACCGCAGCTAGTACGGATCTTATAAATTTACTA	0	C800215.1	Smp_150040.2			Plus / Plus	Plus / Plus	Sense	CAZ32744.1	serine/threonine kinase [Schistosoma mansoni]	1.1e-95	NP_001790	>gi|4502743|ref|NP_001790.1| cyclin-dependent kinase 7 [Homo sapiens]	Q2_P18069,Q2_P17276,Q2_P37656
35674	420	59	Q2_P18070	NO	C800216.1	SJCHGC04672 protein [Schistosoma japonicum] ||Rabaptin RAB GTPase binding effector protein 1 [Xenopus tropicalis] ref|NP_001011070.1| rabaptin RAB GTPase binding effector protein 1 [Xenopus tropicalis] ||zinc-binding FYVE finger protein [Trichinella spiralis] ||PREDICTED: similar to rabaptin RAB GTPase binding effector protein 1 [Strongylocentrotus purpuratus] ||rabaptin RAB GTPase binding effect…	GAGAATTGGAAGAAGCACGTAGACGTCTTGCTGATTTTGTCAATATTACAACTGAACGTG	0	C800216.1	Smp_126170			Plus / Plus	Plus / Plus	Sense	CAZ28454.1	conserved hypothetical protein [Schistosoma mansoni]	5.8e-22	NP_004694	>gi|31377798|ref|NP_004694.2| rabaptin, RAB GTPase binding effector protein 1 isoform 1 [Homo sapiens]	Q2_P33966,Q2_P19389,Q2_P00901,Q2_P23445,Q2_P14241,Q2_P32964,Q2_P18070,Q2_P34123
43462	512	27	Q2_P18071	NO	C800217.1	syntaxin 1 homolog [Hirudo medicinalis] ||s-syntaxin [Loligo pealei] dbj|BAA24019.1| syntaxin [Loligo pealei] ||syntaxin 1A [Lymnaea stagnalis] ||syntaxin [Aplysia californica] sp|Q16932|STX_APLCA Syntaxin gb|AAA03566.1| syntaxin ||SJCHGC09358 protein [Schistosoma japonicum] ||	ATTGAAAGTGCAAAAGCCGACACAAAGAAAGCTGTTAAATATCAAAGTTCAGCTCGGAAG	0	C800217.1	Smp_019890			Plus / Plus	Plus / Plus	Sense	CAZ29671.1	syntaxin, putative [Schistosoma mansoni]	2.2e-82	NP_004594	>gi|4759182|ref|NP_004594.1| syntaxin 1A (brain) [Homo sapiens]	Q2_P32079,Q2_P12269,Q2_P25563,Q2_P05730,Q2_P18071
13508	159	78	Q2_P18072	NO	C800218.1	SJCHGC01947 protein [Schistosoma japonicum] ||Hypothetical protein MGC55505 [Danio rerio] ref|XP_702216.1| PREDICTED: hypothetical protein XP_697124 [Danio rerio] ref|NP_956429.1| hypothetical protein LOC393104 [Danio rerio] ||PREDICTED: hypothetical protein XP_849678 [Canis familiaris] ||PREDICTED: hypothetical protein XP_581261 [Bos taurus] ||Hypothetical protein MGC69312 [Xenopus tropicalis] r…	TAATAGATGTCGTTATAGCTAGCTTACCGTGCATGGATGCTATGTGTTGTTACTTATCAG	0	C800218.1	Smp_123770			Plus / Plus	Plus / Plus	Sense	CAZ28002.1	kettin/titin-related protein [Schistosoma mansoni]	1e-28	NP_612430	>gi|116235444|ref|NP_612430.2| serum amyloid A-like 1 [Homo sapiens]	Q2_P13939,Q2_P33810,Q2_P32879,Q2_P37598,Q2_P18072,Q2_P26799,Q2_P04184,Q2_P13036
29749	350	84	Q2_P18073	NO	C800219.1	SJCHGC04025 protein [Schistosoma japonicum] ||SJCHGC04677 protein [Schistosoma japonicum] ||	GTTTTGTACCATCTGGTAGTGAAGAAATTAAAAAATATCATCGTTGTCGTTGTTTCCCTG	0	C800219.1	Smp_092150			Plus / Plus	Plus / Plus	Sense	CAY17505.1	expressed protein [Schistosoma mansoni]				Q2_P18073
41568	490	3	Q2_P18074	NO	C800220.1	SJCHGC06388 protein [Schistosoma japonicum] ||SJCHGC08934 protein [Schistosoma japonicum] ||	GATAGAGGAGTTGGTTCTAATGAATTATCTTCTTGGTACTATGATTCGAATGATGGGAGA	0	C800220.1	Smp_052230			Plus / Plus	Plus / Plus	Sense	CAZ32761.1	serine-type protease inhibitor, putative [Schistosoma mansoni]				Q2_P18074,Q2_P13035
19991	236	16	Q2_P18075	NO	C800221.1	none	TGAGTCATACAAATGTTTCTGGTCCACGATCATGGAATTTACGATCATATCAAGGATCTG	0	C800221.1	Smp_144280			Plus / Plus	Plus / Plus	Sense	CAZ31651.1	tensin, putative [Schistosoma mansoni]	7.6e-24	NP_073585	>gi|65288071|ref|NP_073585.8| tensin 3 [Homo sapiens]	Q2_P17947,Q2_P20390,Q2_P18075,Q2_P00077,Q2_P02536,Q2_P27460,Q2_P36544,Q2_P10966,Q2_P08647,Q2_P28354,Q2_P11955,Q2_P31779,Q2_P16299,Q2_P30759
1522	18	77	Q2_P18076	NO	C800222.1	SJCHGC01793 protein [Schistosoma japonicum] ||SJCHGC02260 protein [Schistosoma japonicum] ||CG8288-PA [Drosophila melanogaster] ref|NP_511166.2| CG8288-PA [Drosophila melanogaster] ||PREDICTED: similar to CG8288-PA [Apis mellifera] ||SD19562p [Drosophila melanogaster] ||	AACACCTTTGAGTGTGAATCATTTTCGTGTGGGTGATTATTTGGATATAACTGCAAGAAC	0	C800222.1	Smp_087440			Plus / Plus	Plus / Plus	Sense	CAZ36041.1	50S ribosomal protein L3, putative [Schistosoma mansoni]	6.8e-50	NP_009139	>gi|6005862|ref|NP_009139.1| mitochondrial ribosomal protein L3 [Homo sapiens]	Q2_P20176,Q2_P18076
44318	522	33	Q2_P18077	NO	C800223.1	SJCHGC06045 protein [Schistosoma japonicum] ||	CATCCAGTTCATGATGCCGTGTACGATTCATCATCAAATTTCTTATTACATTGTATGACA	0	C800223.1	Smp_175310			Plus / Plus	Plus / Plus	Sense	CAZ36812.1	expressed protein [Schistosoma mansoni]				Q2_P18077
43085	507	75	Q2_P18078	NO	C800224.1	PREDICTED: similar to ATP synthase mitochondrial F1 complex assembly factor 2 isoform 1 [Bos taurus] ||PREDICTED: similar to ATP synthase mitochondrial F1 complex assembly factor 2 [Danio rerio] ||ATP synthase mitochondrial F1 complex assembly factor 2 [Mus musculus] dbj|BAC37311.1| unnamed protein product [Mus musculus] ||PREDICTED: similar to ATP synthase mitochondrial F1 complex assembly facto…	CAGATGTCAAGAACCAGATGATTTAGTTAAAGTGCAATCTCTTTCATGGGATCCTATTAT	0	C800224.1	Smp_162270			Plus / Plus	Plus / Plus	Sense	CAZ34845.1	conserved hypothetical protein [Schistosoma mansoni]	1.7e-28	NP_663729	>gi|21735485|ref|NP_663729.1| ATP synthase mitochondrial F1 complex assembly factor 2 [Homo sapiens]	Q2_P18078
13741	162	56	Q2_P18079	NO	C800225.1	PREDICTED: similar to CG10721-PA [Strongylocentrotus purpuratus] ||PREDICTED: similar to FLJ22028 protein [Gallus gallus] ||PREDICTED: similar to CG10721-PA isoform 1 [Bos taurus] ||PREDICTED: similar to CG10721-PA isoform 4 [Bos taurus] ||PREDICTED: similar to CG10721-PA isoform 3 [Bos taurus] ||	AAAATCAGTTCCGAACCATCTGGAGATAAAATCCCAGAGGATACACAAATCAGACGCATG	0	C800225.1	Smp_168760			Plus / Plus	Plus / Plus	Sense	CAZ35918.1	conserved hypothetical protein [Schistosoma mansoni]	1.3e-89	NP_079130	>gi|51036596|ref|NP_079130.2| pyridine nucleotide-disulphide oxidoreductase domain 1 [Homo sapiens]	Q2_P35510,Q2_P15559,Q2_P31901,Q2_P12089,Q2_P18079
43938	517	78	Q2_P18080	NO	C800226.1	serine/threonine protein kinase [Drosophila melanogaster] ||CG6027-PA [Drosophila melanogaster] ref|NP_524401.2| CG6027-PA [Drosophila melanogaster] gb|AAO42656.1| GH25051p [Drosophila melanogaster] ||PREDICTED: similar to testis specific protein kinase 1 [Danio rerio] ||Testis specific protein kinase 1 [Rattus norvegicus] ref|NP_113766.1| testis specific protein kinase 1 [Rattus norvegicus] ref|…	GCCTGTGGTCTTCACCATCTACACAGTCACAGTCTAATTCATCGAGATTTAACCTCTCAG	0	C800226.1	Smp_172880			Plus / Plus	Plus / Plus	Sense	CAZ36486.1	expressed protein [Schistosoma mansoni]				Q2_P19048,Q2_P18080
37509	442	24	Q2_P00079	NO	C800228.1	none	CCCCGTAACCCCTGTTATTGTAATTTCGTTTTCATTTGAATGTTCTTCTACTTCTTTGTA	0	C800228.1	Smp_125330			Plus / Minus	Plus / Minus	Sense	CAZ28296.1	DEAD box ATP-dependent RNA helicase, putative [Schistosoma mansoni]	2.8e-98	NP_065987	>gi|41327779|ref|NP_065987.1| DEAD (Asp-Glu-Ala-Asp) box polypeptide 55 [Homo sapiens]
29931	353	11	Q2_P18083	NO	C800229.1	hypothetical protein LOC74349 [Mus musculus] gb|AAH63093.1| Hypothetical protein LOC74349 [Mus musculus] ||PREDICTED: similar to CG3558-PA isoform A isoform 1 [Canis familiaris] ||PREDICTED: similar to CG3558-PA isoform A isoform 4 [Canis familiaris] ||PREDICTED: similar to CG3558-PA isoform A isoform 2 [Canis familiaris] ||Similar to 4632419K20Rik protein [Rattus norvegicus] ref|NP_001005538.1| …	GCCACAGCTTACCTGGAATTATTTTTACGTCGTTTAACTGAACCTTCAATGATCAAATTA	0	C800229.1	Smp_149080			Plus / Plus	Plus / Plus	Sense	CAZ32572.1	expressed protein [Schistosoma mansoni]	4.3e-54	NP_001092264	>gi|149393138|ref|NP_001092264.1| hypothetical protein LOC84067 isoform 2 [Homo sapiens]	Q2_P18083,Q2_P10453,Q2_P03966,Q2_P23331,Q2_P30226
5688	67	78	Q2_P18084	NO	C800230.1	SJCHGC04559 protein [Schistosoma japonicum] ||c-src tyrosine kinase [Gallus gallus] sp|P41239|CSK_CHICK Tyrosine-protein kinase CSK (C-SRC kinase) gb|AAA51436.1| src kinase ||PREDICTED: similar to c-src tyrosine kinase [Danio rerio] ||unnamed protein product [Tetraodon nigroviridis] ||c-src tyrosine kinase variant [Homo sapiens] ||	TATCGTGGTCGACAAGTAGCGGTGAAAATTTACAAAAAGACTGCTTCTAAATTAGCTATA	0	C800230.1	Smp_125360			Plus / Plus	Plus / Plus	Sense	CAZ28303.1	tyrosine kinase [Schistosoma mansoni]	1.6e-95	NP_004374	>gi|4758078|ref|NP_004374.1| c-src tyrosine kinase [Homo sapiens]	Q2_P18084
20261	239	31	Q2_P18085	NO	C800231.1	SJCHGC02464 protein [Schistosoma japonicum] ||CG32549-PE isoform E [Drosophila melanogaster] ref|NP_728162.1| CG32549-PE isoform E [Drosophila melanogaster] ||CG32549-PA isoform A [Drosophila melanogaster] ref|NP_996510.1| CG32549-PA isoform A [Drosophila melanogaster] ||CG32549-PF isoform F [Drosophila melanogaster] gb|AAS65405.1| CG32549-PB isoform B [Drosophila melanogaster] ref|NP_996509.1| C…	GATGAAGAACAGGATGACTCATTTGATTCCGATTAAAGTTATTGAACTTCACCAATTCCT	0	C800231.1	Smp_147840			Plus / Plus	Plus / Plus	Sense	CAZ32346.1	cytosolic purine 5-nucleotidase, putative [Schistosoma mansoni]	1e-147	NP_036361	>gi|6912598|ref|NP_036361.1| 5'-nucleotidase, cytosolic II [Homo sapiens]
11329	134	24	Q2_P18086	NO	C800232.1	Hypothetical protein C47D12.6a [Caenorhabditis elegans] ref|NP_001022033.1| Threonyl tRNA Synthetase family member (trs-1) [Caenorhabditis elegans] sp|P52709|SYTC_CAEEL Threonyl-tRNA synthetase cytoplasmic (Threonine--tRNA ligase) (ThrRS) ||Hypothetical protein C47D12.6b [Caenorhabditis elegans] ref|NP_001022034.1| Threonyl tRNA Synthetase family member (trs-1) [Caenorhabditis elegans] ||Hypothet…	GTGTCTATGGTGTTTCATTTCCAGATCCAAAACGTTTGAAGGAATGGAAACACATTCAAG	0	C800232.1	Smp_123990			Plus / Plus	Plus / Plus	Sense	CAZ28036.1	threonyl-tRNA synthetase, putative [Schistosoma mansoni]	3.9e-76	NP_689508	>gi|38202255|ref|NP_689508.3| threonyl-tRNA synthetase [Homo sapiens]	Q2_P18086,Q2_P40261
13450	159	20	Q2_P18088	NO	C800234.1	SJCHGC07598 protein [Schistosoma japonicum] ||PREDICTED: similar to ENSANGP00000011812 [Apis mellifera] ||PREDICTED: similar to CG15270-PA isoform A [Danio rerio] ||PREDICTED: similar to CG15270-PA isoform A [Canis familiaris] ||KIAA1623 protein [Homo sapiens] ||	TATCTGGAACATTGGAAAAGGACTAGTTCATTTTTAGCTTATCGCTGGAGTTCATGGGAT	0	C800234.1	Smp_002890			Plus / Plus	Plus / Plus	Sense	CAZ27986.1	DNA-directed RNA polymerase III largest subunit, putative [Schistosoma mansoni]	4e-85	NP_008986	>gi|39725938|ref|NP_008986.2| polymerase (RNA) III (DNA directed) polypeptide A, 155kDa [Homo sapiens]	Q2_P40438,Q2_P41200,Q2_P38687,Q2_P18088
33474	394	69	Q2_P18089	NO	C800235.1	ENSANGP00000014968 [Anopheles gambiae str. PEST] ref|XP_308778.2| ENSANGP00000014968 [Anopheles gambiae str. PEST] ||CG7510-PA [Drosophila melanogaster] ref|NP_648998.2| CG7510-PA [Drosophila melanogaster] gb|AAM51967.1| LD04710p [Drosophila melanogaster] ||PREDICTED: similar to Protein GPR155 (G-protein coupled receptor PGR22) [Strongylocentrotus purpuratus] ||PREDICTED: similar to Protein GPR15…	GGAACGTGCTCGTAGTCTATGCTTTGTATTACGATATCAATTGCATATTTACTTAGCTGG	0	C800235.1	Smp_144770			Plus / Plus	Plus / Plus	Sense	CAZ31731.1	expressed protein [Schistosoma mansoni]	2e-88	NP_001028217	>gi|74271832|ref|NP_001028217.1| G protein-coupled receptor 155 isoform 9 [Homo sapiens]	Q2_P36142,Q2_P00656,Q2_P19056,Q2_P26257,Q2_P30710,Q2_P10914,Q2_P18089
37686	444	31	Q2_P18090	NO	C800236.1	cystinosis nephropathic [Mus musculus] emb|CAI24795.1| cystinosis nephropathic [Mus musculus] gb|AAH05479.1| Cystinosis nephropathic [Mus musculus] dbj|BAE23249.1| unnamed protein product [Mus musculus] dbj|BAE42030.1| unnamed protein product [Mus musculus] dbj|BAC37598.1| unnamed protein product [Mus musculus] dbj|BAC35789.1| unnamed protein product [Mus musculus] dbj|BAC37316.1| unnamed protein…	GGTTCAGTACCTGTACAAGAGAATGATTTGGCATTTGCATTTCATGCATTTCTAATTTCT	0	C800236.1	Smp_169870			Plus / Plus	Plus / Plus	Sense	CAZ36053.1	cystinosin, putative [Schistosoma mansoni]	1.4e-62	NP_004928	>gi|119943110|ref|NP_004928.2| cystinosin isoform 2 [Homo sapiens]	Q2_P28913,Q2_P18090
30646	361	46	Q2_P18092	NO	C800238.1	SJCHGC07907 protein [Schistosoma japonicum] ||SJCHGC02139 protein [Schistosoma japonicum] ||	CCGTTTATTGCTATGGCTTGAACAAGGTAAACCAGCTGGTTTAAAAATCAATATACACTT	0	C800238.1	Smp_152450			Plus / Plus	Plus / Plus	Sense	CAZ33181.1	hypothetical protein [Schistosoma mansoni]				Q2_P27542,Q2_P18092
482	6	57	Q2_P18093	NO	C800239.1	SJCHGC05438 protein [Schistosoma japonicum] ||SJCHGC05627 protein [Schistosoma japonicum] ||SJCHGC06191 protein [Schistosoma japonicum] ||	CAAGACTCAACAATATGAAAAACACCCTCACACACAGAAGTAAATAAATGAGTGAAGCAA	0	C800239.1	Smp_044750			Plus / Plus	Plus / Plus	Sense	CAZ32033.1	marvel-containing potential lipid raft-associated protein, putative [Schistosoma mansoni]
29970	353	50	Q2_P18094	NO	C800240.1	SJCHGC07832 protein [Schistosoma japonicum] ||PREDICTED: similar to serine/threonine protein kinase Akt [Apis mellifera] ||Dakt1 serine-threonine protein kinase [Drosophila melanogaster] ||RAC protein kinase DRAC-PK85 [Drosophila melanogaster] ||CG4006-PC isoform C [Drosophila melanogaster] ref|NP_732113.3| CG4006-PC isoform C [Drosophila melanogaster] ||	GGCGCAACCTTTAAATAATTTTACTGTTCGCGACTGTCAAATTATATGTTTAAACAAGCC	0	C800240.1	Smp_073930.2			Plus / Plus	Plus / Plus	Sense	CAZ34803.1	rac-alpha serine/threonine-protein kinase (ec 2.7.1.37) (rac-pk-alpha)(akt1 kinase) (protein kinase b) (pkb) (c-akt) (thymoma viral proto-oncogene) [Schistosoma mansoni]	3e-153	NP_005154	>gi|62241011|ref|NP_005154.2| AKT1 kinase [Homo sapiens]	Q2_P18094,Q2_P05000,Q2_P17657,Q2_P05637
44211	521	11	Q2_P18095	NO	C800241.1	SJCHGC03565 protein [Schistosoma japonicum] ||Shmt1-prov protein [Xenopus laevis] ||PREDICTED: similar to serine hydroxymethyltransferase 1 (soluble) [Strongylocentrotus purpuratus] ||serine hydroxymethyltransferase 1 (soluble) [Xenopus tropicalis] ||Shmt1 protein [Danio rerio] ||	TTTAGATTATCCGAGATTTCGACAAATTGCAGATTCAGTCTCAGCTGTGTTACTTGCTGA	0	C800241.1	Smp_179710			Plus / Plus	Plus / Plus	Sense	CAZ37369.1	serine hydroxymethyltransferase putative [Schistosoma mansoni]	1e-148	NP_005403	>gi|19923315|ref|NP_005403.2| serine hydroxymethyltransferase 2 (mitochondrial) [Homo sapiens]	Q2_P18095,Q2_P22073
7503	89	23	Q2_P18096	NO	C800242.1	none	TTGAACTTGATCGAACAGGTATTTTATTAGCTTATGGAACTGAGTCTGGCACAGTTACTG	0	C800242.1	Smp_066290			Plus / Plus	Plus / Plus	Sense	CAZ34101.1	expressed protein [Schistosoma mansoni]				Q2_P18096,Q2_P00082,Q2_P09091,Q2_P17797,Q2_P17008,Q2_P38272,Q2_P28817
21676	256	1	Q2_P18098	NO	C800244.1	SJCHGC06086 protein [Schistosoma japonicum] ||uridine-cytidine kinase 2 [Homo sapiens] emb|CAH74066.1| uridine-cytidine kinase 2 [Homo sapiens] emb|CAI15121.1| uridine-cytidine kinase 2 [Homo sapiens] gb|AAK14053.1| uridine-cytidine kinase 2 [Homo sapiens] gb|AAH02906.2| Uridine-cytidine kinase 2 [Homo sapiens] sp|Q9BZX2|UCK2_HUMAN Uridine-cytidine kinase 2 (UCK 2) (Uridine monophosphokinase 2) (…	CAGTATATGCCTGCATAGCATCCTGATAATTATTTTAATCTGATTTGAAGAGAGCCTTTG	0	C800244.1	Smp_062260.1			Plus / Plus	Plus / Plus	Sense	CAZ33739.1	uridine cytidine kinase I, putative [Schistosoma mansoni]	6.1e-47	NP_036606	>gi|18699734|ref|NP_036606.2| uridine-cytidine kinase 2 [Homo sapiens]	Q2_P18098,Q2_P33949
10695	126	70	Q2_P18099	NO	C800245.1	SJCHGC02216 protein [Schistosoma japonicum] ||SJCHGC01417 protein [Schistosoma japonicum] ||	TTTTTACATGCTTTTTCGACTTTGTCTTTTCGTGGGGCTTTGTTTCGCATATTCATCTTT	0	C800245.1	Smp_139950			Plus / Plus	Plus / Plus	Sense	CAZ30966.1	expressed protein [Schistosoma mansoni]				Q2_P18099,Q2_P29880,Q2_P10116
16843	199	13	Q2_P18100	NO	C800246.1	SJCHGC05841 protein [Schistosoma japonicum] ||Atg4b protein [Danio rerio] ||Cysteine protease APG4B (Autophagy 4 homolog B) ||APG4 autophagy 4 homolog A [Xenopus tropicalis] ||APG4A protein [Xenopus laevis] ||	AGTTGTCCATTTGCTCAATCTGTTACTGATGTAAATCAAAGTTGTGATTGGAACAGTGAA	0	C800246.1	Smp_039820			Plus / Plus	Plus / Plus	Sense	CAZ31580.1	autophagin-1 (C54 family) [Schistosoma mansoni]	3.1e-46	NP_847896	>gi|30410798|ref|NP_847896.1| APG4 autophagy 4 homolog B isoform b [Homo sapiens]	Q2_P12223,Q2_P01392,Q2_P18100
7828	93	8	Q2_P18101	NO	C800247.1	PREDICTED: similar to ENSANGP00000027554 [Apis mellifera] ||PREDICTED: similar to mKIAA0699 protein [Gallus gallus] ||PREDICTED: similar to bicaudal D homolog 1 isoform 1 [Strongylocentrotus purpuratus] ||ENSANGP00000012196 [Anopheles gambiae str. PEST] ref|XP_319388.2| ENSANGP00000012196 [Anopheles gambiae str. PEST] ||ENSANGP00000027554 [Anopheles gambiae str. PEST] ref|XP_554113.1| ENSANGP0000…	CGTGACCAGCGGCATAATTTACGCAAGGAACTTGACAGCAGAATTATATCGGATTCAATA	0	C800247.1	Smp_028070.1			Plus / Plus	Plus / Plus	Sense	CAZ30483.1	bicaudal D-like protein [Schistosoma mansoni]	1.6e-93	NP_001705	>gi|51039802|ref|NP_001705.2| bicaudal D homolog 1 isoform 1 [Homo sapiens]	Q2_P33453,Q2_P18101,Q2_P24235,Q2_P31898,Q2_P12086
6458	76	83	Q2_P18102	NO	C800248.1	SJCHGC09306 protein [Schistosoma japonicum] ||FE1 [Schistosoma japonicum] ||SJCHGC07245 protein [Schistosoma japonicum] ||hypothetical protein MG10929.4 [Magnaporthe grisea 70-15] ||hypothetical protein FG02781.1 [Gibberella zeae PH-1] ref|XP_382957.1| hypothetical protein FG02781.1 [Gibberella zeae PH-1] ||	AGCTCCTGATTTGGCAGCTGTTTTATCGTGTTTTGTATTTGAAACACGTTCCACTACTGA	0	C800248.1	Smp_177200			Plus / Plus	Plus / Plus	Sense	CAZ37078.1	helicase, putative [Schistosoma mansoni]	3.7e-45	NP_008860	>gi|67782311|ref|NP_008860.4| superkiller viralicidic activity 2-like homolog [Homo sapiens]	Q2_P02328,Q2_P21371,Q2_P40822,Q2_P30724,Q2_P18102
25647	302	62	Q2_P00084	NO	C800250.1	CG7210-PB isoform B [Drosophila melanogaster] ref|NP_476589.4| CG7210-PB isoform B [Drosophila melanogaster] ||Ring canal kelch protein [Contains: Kelch short protein] ||CG7210-PA isoform A [Drosophila melanogaster] ref|NP_724095.1| CG7210-PA isoform A [Drosophila melanogaster] ||putative kelch-like protein 2 [Anopheles stephensi] ||Ring canal kelch homolog (Kelch-like protein 1) [Contains: Kelch…	GAATTTTCTTACCACTGCCAATCTATGTGCACGTACACACTGAAAATTTAATATCTTGTC	0	C800250.1	Smp_141890			Plus / Minus	Plus / Minus	Sense	CAZ31258.1	kelch-like protein [Schistosoma mansoni]	3e-146	NP_059111	>gi|166235129|ref|NP_059111.2| kelch-like 3 [Homo sapiens]
26790	316	15	Q2_P18105	NO	C800252.1	SJCHGC04163 protein [Schistosoma japonicum] ||	CAACTCTCTCTTCTGGGCTTCAATTTATTTTGGATCACAATCTTTTGAACGACAACAAGC	0	C800252.1	Smp_083530.1			Plus / Plus	Plus / Plus	Sense	CAZ35691.1	calpain-7 (C02 family) [Schistosoma mansoni]	0.0	NP_055111	>gi|7656959|ref|NP_055111.1| calpain 7 [Homo sapiens]
9196	109	16	Q2_P18106	NO	C800253.1	Sodium/myo-inositol cotransporter (Na(+)/myo-inositol cotransporter) gb|AAC39548.1| sodium/myo-inositol cotransporter [Homo sapiens] ||PREDICTED: similar to solute carrier family 5 (inositol transporters) member 3 sodium/myo-inositol cotransporter 1 human solute carrier family 5 member 3 Sodium/myo-inositol cotransporter solute carrier family 5 (inositol transporter) member 3 ... [Pan troglodytes…	CCAATGTTCTTAACACAACAAATTACACTTCATTAACTCAATTGGCAAGTTCACCAGATG	0	C800253.1	Smp_134080			Plus / Plus	Plus / Plus	Sense	CAZ29877.1	inositol transporter [Schistosoma mansoni]	2e-165	NP_008864	>gi|110835708|ref|NP_008864.3| solute carrier family 5 (inositol transporters), member 3 [Homo sapiens]	Q2_P00215,Q2_P09537,Q2_P18106
36684	432	49	Q2_P18107	NO	C800254.1	SJCHGC04202 protein [Schistosoma japonicum] ||PREDICTED: similar to Septin-4 (Peanut-like protein 2) (Brain protein H5) isoform 1 [Bos taurus] ||Unknown (protein for MGC:73218) [Danio rerio] ref|NP_956282.1| hypothetical protein LOC335925 [Danio rerio] ||septin 4 [Mus musculus] emb|CAI35134.1| septin 4 [Mus musculus] dbj|BAE22437.1| unnamed protein product [Mus musculus] sp|P28661|SEPT4_MOUSE Sep…	CGTCTTCAACATAAAGTCAACATAGTCCCTGTAATAGCTAAAGCTGATGCATTGACTGCT	0	C800254.1	Smp_041060			Plus / Plus	Plus / Plus	Sense	CAZ31697.1	septin, putative [Schistosoma mansoni]	1e-119	NP_002679	>gi|9945439|ref|NP_002679.2| septin 5 [Homo sapiens]	Q2_P00907,Q2_P11201,Q2_P18107,Q2_P19400
16358	193	38	Q2_P18108	NO	C800255.1	SJCHGC05068 protein [Schistosoma japonicum] ||ASF1A [Homo sapiens] ||ASF1 anti-silencing function 1 homolog A [Homo sapiens] ref|XP_533479.1| PREDICTED: similar to ASF1 anti-silencing function 1 homolog A [Canis familiaris] emb|CAB43363.1| hypothetical protein [Homo sapiens] gb|AAH10878.1| ASF1 anti-silencing function 1 homolog A [Homo sapiens] gb|AAK82972.1| anti-silencing function 1A [Homo sapi…	AAAATAATAAATTAGACCCATCTAACTTTTGTGAAGGCCAGTCTGGCGTACAGTTTATAG	0	C800255.1	Smp_033020			Plus / Plus	Plus / Plus	Sense	CAZ30975.1	anti-silencing protein, putative [Schistosoma mansoni]	1.1e-47	NP_054753	>gi|7661592|ref|NP_054753.1| ASF1 anti-silencing function 1 homolog A [Homo sapiens]	Q2_P35860,Q2_P18108
42847	505	7	Q2_P18109	NO	C800256.1	none	TAGTATGCAACGAATACGGAATGCATTTATCAGGTTAACCGCTGCTCAAGTATCAAATAA	0	C800256.1	Smp_134140			Plus / Plus	Plus / Plus	Sense	CAZ29891.1	camp-specific 3,5-cyclic phosphodiesterase, putative [Schistosoma mansoni]	1e-153	NP_002591	>gi|32171241|ref|NP_002591.2| phosphodiesterase 4B isoform 1 [Homo sapiens]	Q2_P18109,Q2_P00086,Q2_P35190,Q2_P20341,Q2_P10616,Q2_P23001,Q2_P03667,Q2_P30393,Q2_P08806
32453	382	68	Q2_P18110	NO	C800257.1	PREDICTED: similar to dynein axonemal heavy polypeptide 5 partial [Bos taurus] ||dynein axonemal heavy chain 5 [Mus musculus] gb|AAL69993.1| axonemal dynein heavy chain 5 [Mus musculus] sp|Q8VHE6|DYH5_MOUSE Ciliary dynein heavy chain 5 (Axonemal beta dynein heavy chain 5) (Mdnah5) ||dynein axonemal heavy polypeptide 5 [Homo sapiens] gb|AAK92217.1| axonemal dynein heavy chain DNAH5 [Homo sapiens] …	CACTTCACTATTTGTCAAGGGCACTAATCAAATGATCTTTGCATGGAAAGCATATATTAC	0	C800257.1	Smp_165820			Plus / Plus	Plus / Plus	Sense	CAZ35446.1	dynein heavy chain, putative [Schistosoma mansoni]	0.0	NP_001360	>gi|19115954|ref|NP_001360.1| dynein, axonemal, heavy chain 5 [Homo sapiens]	Q2_P18110,Q2_P20919,Q2_P32153
24407	288	12	Q2_P00087	NO	C800258.1	SJCHGC02867 protein [Schistosoma japonicum] ||similar to GenBank Accession Number Z98600 cofilin in Schizosaccharomyces pombe [Schistosoma japonicum] ||hypothetical protein FG06245.1 [Gibberella zeae PH-1] ref|XP_386421.1| hypothetical protein FG06245.1 [Gibberella zeae PH-1] ||GA18060-PA [Drosophila pseudoobscura] ||CG4254-PA [Drosophila melanogaster] gb|AAR09835.1| similar to Drosophila melanog…	GAAGACTTGAACTCCCAAGGTTTAATACCATCATGTTACTATTAAAGCTGACACTTGTTT	0	C800258.1	Smp_120700.2			Plus / Minus	Plus / Minus	Sense
30939	364	84	Q2_P18111	NO	C800259.1	SJCHGC02648 protein [Schistosoma japonicum] ||PREDICTED: similar to chromosome 10 open reading frame 89 isoform 1 [Bos taurus] ||PREDICTED: similar to chromosome 10 open reading frame 89 isoform 2 [Bos taurus] ||	GTTAATCAATGAAGGTCGTGTGTATATTTCCAACTCCTCATGGATTGATCTTGAACCTTA	0	C800259.1	Smp_074770			Plus / Plus	Plus / Plus	Sense	CAZ34891.1	expressed protein [Schistosoma mansoni]	6.3e-29	NP_699167	>gi|224465209|ref|NP_699167.2| phosphoseryl-tRNA kinase [Homo sapiens]
19962	235	72	Q2_P18112	NO	C800260.1	PREDICTED: similar to CG1553-PA isoform A [Strongylocentrotus purpuratus] ||unnamed protein product [Homo sapiens] ||PREDICTED: similar to Protein C14orf104 [Pan troglodytes] ||PREDICTED: similar to GA13787-PA [Apis mellifera] ||hypothetical protein LOC109065 [Mus musculus] gb|AAH55807.1| Hypothetical protein LOC109065 [Mus musculus] gb|AAH62898.1| Hypothetical protein LOC109065 [Mus musculus] ||	CAAGCAATCAAGATGTTATCCTCATTTCGTAATTGTGGTAATCCTGAGGGTTTATCCAAC	0	C800260.1	Smp_077120			Plus / Plus	Plus / Plus	Sense	CAZ35124.1	expressed protein [Schistosoma mansoni]				Q2_P18112,Q2_P13364,Q2_P11759,Q2_P31555,Q2_P23098,Q2_P11827,Q2_P28493,Q2_P23144,Q2_P31627
2104	25	64	Q2_P18113	NO	C800261.1	SJCHGC04524 protein [Schistosoma japonicum] ||presenilin enhancer 2 homolog [Danio rerio] gb|AAM88324.1| presenilin enhancer [Danio rerio] sp|Q8JHF0|PEN2_BRARE Gamma-secretase subunit Psenen (Presenilin enhancer protein 2 homolog) ||PREDICTED: similar to Gamma-secretase subunit Pen-2 (Presenilin enhancer protein 2) [Strongylocentrotus purpuratus] ||Presenilin enhancer 2 homolog [Danio rerio] ||EN…	CCTAGATAAAATGTGTCATTTCGTACCTCCACTTTATATTTTCATTATCCCAGTGGTACC	0	C800261.1	Smp_139580			Plus / Plus	Plus / Plus	Sense	CAZ30889.1	hypothetical protein [Schistosoma mansoni]
15384	181	84	Q2_P18115	NO	C800263.1	SJCHGC09493 protein [Schistosoma japonicum] ||inhibitor of apoptosis protein [Schistosoma japonicum] ||	GGAAGCTAGAACACCTACTCCCAGTTGCTCATATTACATTAATCATTCAGTTTCAAAATA	0	C800263.1	Smp_076370			Plus / Plus	Plus / Plus	Sense	CAZ35045.1	inhibitor of apoptosis protein, putative [Schistosoma mansoni]
19916	235	26	Q2_P18116	NO	C800264.1	PREDICTED: similar to ENSANGP00000021856 [Apis mellifera] ||CG40351-PA.3 [Drosophila melanogaster] ref|NP_001015222.1| CG40351-PB.3 [Drosophila melanogaster] gb|EAL24599.1| CG40351-PB.3 [Drosophila melanogaster] gb|EAL24598.1| CG40351-PA.3 [Drosophila melanogaster] ||ENSANGP00000021856 [Anopheles gambiae str. PEST] ref|XP_307938.2| ENSANGP00000021856 [Anopheles gambiae str. PEST] ||MGC81602 prote…	GCCATGTGGTTCGTAAGGGTGTCGCTGAACTACGTGAACATCAATATGAAGCCAAAGGAA	0	C800264.1	Smp_140390.3			Plus / Plus	Plus / Plus	Sense	CAZ31055.1	mixed-lineage leukemia protein, mll, putative [Schistosoma mansoni]	3.8e-46	NP_055863	>gi|210032580|ref|NP_055863.1| SET domain containing 1B [Homo sapiens]
18010	212	75	Q2_P18117	NO	C800265.1	SJCHGC08153 protein [Schistosoma japonicum] ||PREDICTED: hypothetical protein XP_394881 [Apis mellifera] ||Leucine-rich repeat [Psychrobacter cryohalolentis K5] gb|EAO11748.1| Leucine-rich repeat [Psychrobacter cryohalolentis K5] ||Small GTP-binding protein domain [Trichodesmium erythraeum IMS101] gb|EAO29834.1| Small GTP-binding protein domain [Trichodesmium erythraeum IMS101] ||leucine-rich-rep…	CAGAAAACTCTTTAACTGATTTTCCAGCCAACATTCATCGTTGTCGCAAACTAAATGTTT	0	C800265.1	Smp_063230			Plus / Plus	Plus / Plus	Sense	CAZ33831.1	leucine-rich repeat-containing protein, putative [Schistosoma mansoni]	1.6e-45	NP_065761	>gi|24308207|ref|NP_065761.1| leucine rich repeat containing 47 [Homo sapiens]	Q2_P18117,Q2_P12023,Q2_P08770,Q2_P28481,Q2_P19717
10306	122	21	Q2_P18118	NO	C800266.1	hypothetical protein [Schistosoma japonicum] ||unknown [Schistosoma japonicum] ||PREDICTED: similar to survival motor neuron domain containing 1 [Strongylocentrotus purpuratus] ||PREDICTED: similar to LD28068p [Apis mellifera] ||ENSANGP00000020645 [Anopheles gambiae str. PEST] ref|XP_316313.2| ENSANGP00000020645 [Anopheles gambiae str. PEST] ||	GCAGCAAAAAGCAGTAAACATTCCTCCTGCTTTGTACATATTGTAAATATACTTCAAACC	0	C800266.1	Smp_064830			Plus / Plus	Plus / Plus	Sense	CAZ33969.1	survival motor neuron protein, putative [Schistosoma mansoni]				Q2_P18118,Q2_P22294,Q2_P09237,Q2_P28981,Q2_P41630
9248	109	68	Q2_P18120	NO	C800268.1	SJCHGC05537 protein [Schistosoma japonicum] ||G protein beta subunit [Pinctada fucata] ||GTP-binding protein beta subunit [Loligo forbesi] pir||RGOOBE GTP-binding regulatory protein beta chain - northern European squid sp|P23232|GBB_LOLFO Guanine nucleotide-binding protein beta subunit prf||1705183A GTP binding protein ||visual G-protein beta subunit [Loligo pealei] ||Hypothetical protein F13D12.…	CCCCCGTTTATACATATGCATAAAATGCCCTTTGGATTATAATATGCCTTCATGTTTCAA	0	C800268.1	Smp_063640			Plus / Plus	Plus / Plus	Sense	CAZ33872.1	G-protein, beta subunit, putative [Schistosoma mansoni]	2e-163	NP_002065	>gi|11321585|ref|NP_002065.1| guanine nucleotide-binding protein, beta-1 subunit [Homo sapiens]	Q2_P18120,Q2_P40051,Q2_P41328,Q2_P09389,Q2_P36653,Q2_P30605,Q2_P10812,Q2_P16389,Q2_P36650,Q2_P29136
33643	396	68	Q2_P18121	NO	C800269.1	SJCHGC02816 protein [Schistosoma japonicum] ||ribosomal protein L7a [Gallus gallus] ref|NP_001004379.1| ribosomal protein L7a [Gallus gallus] dbj|BAC65169.1| ribosomal protein L7a [Gallus gallus] sp|P32429|RL7A_CHICK 60S ribosomal protein L7a dbj|BAA03395.1| ribosomal protein L7a [Gallus gallus] ||Ribosomal protein L7a [Danio rerio] ref|NP_956341.1| ribosomal protein L7a [Danio rerio] gb|AAH71352…	CGTTGATCCTATTGAGATTGTAATTTTCCTCCCTGCATTGTGCAGAAAAATGGGTGTACC	0	C800269.1	Smp_177210			Plus / Plus	Plus / Plus	Sense	CAZ37079.1	60S ribosomal protein L7a, putative [Schistosoma mansoni]	3.6e-76	NP_000963	>gi|4506661|ref|NP_000963.1| ribosomal protein L7a [Homo sapiens]	Q2_P12762,Q2_P18121
5455	65	15	Q2_P18123	NO	C800271.1	unnamed protein product [Mus musculus] ||peptidylprolyl isomerase-like 2 [Mus musculus] gb|AAH28899.1| Peptidylprolyl isomerase-like 2 [Mus musculus] dbj|BAE36483.1| unnamed protein product [Mus musculus] dbj|BAC41068.1| unnamed protein product [Mus musculus] sp|Q9D787|PPIL2_MOUSE Peptidyl-prolyl cis-trans isomerase-like 2 (PPIase) (Rotamase) (Cyclophilin-60) (Cyclophilin-like protein Cyp-60) ||p…	TCAGTTCTTTATTACTTTCCGAAAGTGCAAGCATCTGGATCGCAAGCACACTGTATTCGG	0	C800271.1	Smp_021160.1			Plus / Plus	Plus / Plus	Sense
448	6	23	Q2_P18124	NO	C800272.1	similar to GenBank Accession Number AF015308 nucleolar protein in Homo sapiens [Schistosoma japonicum] ||Microspherule protein 1 [Danio rerio] ref|NP_998438.1| microspherule protein 1 [Danio rerio] ||Microspherule protein 1 [Danio rerio] ||microspherule protein 1 [Xenopus tropicalis] ||nucleolar protein [Homo sapiens] ||	GTGTAAAGTTGAAGTCAATACCTAACTATAACGCATCATTATCGACTTCATCAGATGTCA	0	C800272.1	Smp_173780			Plus / Plus	Plus / Plus	Sense	CAZ36593.1	conserved hypothetical protein [Schistosoma mansoni]				Q2_P18124
2769	33	49	Q2_P18125	NO	C800273.1	SJCHGC03638 protein [Schistosoma japonicum] ||MGC68800 protein [Xenopus laevis] ||MGC68800 protein [Xenopus laevis] ||oxoglutarate dehydrogenase (lipoamide) [Mus musculus] dbj|BAE27824.1| unnamed protein product [Mus musculus] gb|AAH13670.1| Ogdh protein [Mus musculus] dbj|BAE41044.1| unnamed protein product [Mus musculus] ||unnamed protein product [Mus musculus] ||	TTTACCACTGACCCTCGTATGGCCCGTTCATCACCATATTGTACTGATGTTGCTCGGGTA	0	C800273.1	Smp_044970			Plus / Plus	Plus / Plus	Sense	CAZ32056.1	2-oxoglutarate dehydrogenase [Schistosoma mansoni]	0.0	NP_002532	>gi|51873036|ref|NP_002532.2| oxoglutarate (alpha-ketoglutarate) dehydrogenase (lipoamide) isoform 1 precursor [Homo sapiens]	Q2_P19732,Q2_P18125,Q2_P12385,Q2_P32185,Q2_P11737,Q2_P31536,Q2_P31284,Q2_P11492,Q2_P11743
26002	306	77	Q2_P18126	NO	C800274.1	SJCHGC07265 protein [Schistosoma japonicum] ||LRRGT00039 [Rattus norvegicus] ||SWIRM domain containing protein [Dictyostelium discoideum] gb|EAL67266.1| myb domain-containing protein [Dictyostelium discoideum] ||hypothetical protein DDB0191483 [Dictyostelium discoideum] gb|EAL64735.1| hypothetical protein DDB0191483 [Dictyostelium discoideum] ||hypothetical protein DDB0203368 [Dictyostelium disco…	CAAGACAATGAATGGTCCTTTCTCACTAATTGAACGTACTACTACCATACCACTTAATAA	0	C800274.1	Smp_157540			Plus / Plus	Plus / Plus	Sense	CAZ34047.1	smad, putative [Schistosoma mansoni]	4e-73	NP_005892	>gi|5174511|ref|NP_005892.1| Sma- and Mad-related protein 2 isoform 1 [Homo sapiens]	Q2_P02449,Q2_P27750,Q2_P32832,Q2_P18126
23275	274	70	Q2_P18127	NO	C800275.1	none	GTGGCTATAGCTCGTCTATGTTTAATTGAGCTTGCTCGAATAGGATTAGTTCGTGCCTTA	0	C800275.1	Smp_126200			Plus / Plus	Plus / Plus	Sense	CAZ28461.1	expressed protein [Schistosoma mansoni]				Q2_P18127,Q2_P00090,Q2_P07824,Q2_P28129,Q2_P40931,Q2_P08420,Q2_P27393
7150	85	10	Q2_P18128	NO	C800276.1	none	CCATCATCTTCGTCATTATGGTCAGGGAAGACAACAAAATCATCAATAATGAATTATAGC	0	C800276.1	Smp_054350			Plus / Plus	Plus / Plus	Sense	CAZ32964.1	forkhead protein/ forkhead protein domain, putative [Schistosoma mansoni]	1.4e-48	NP_036315	>gi|6912372|ref|NP_036315.1| forkhead box D3 [Homo sapiens]	Q2_P18128
31679	373	59	Q2_P18129	NO	C800277.1	SJCHGC05662 protein [Schistosoma japonicum] ||hypothetical protein [Gallus gallus] ref|NP_001006145.1| IK cytokine down-regulator of HLA II [Gallus gallus] ||RED protein [Homo sapiens] emb|CAA06607.1| Prer protein [Homo sapiens] sp|Q13123|RED_HUMAN Red protein (RER protein) (IK factor) (Cytokine IK) ||hypothetical protein [Pongo pygmaeus] ||hypothetical protein [Pongo pygmaeus] ||	GTACACAAGCATCATACTTTGATATTCCCGCCAACGCTGATTCAGTCACAAATAATTCAA	0	C800277.1	Smp_004480			Plus / Plus	Plus / Plus	Sense	CAZ28136.1	red protein (ik factor) (cytokine ik), putative [Schistosoma mansoni]	2e-99	NP_006074	>gi|125988409|ref|NP_006074.2| RED protein [Homo sapiens]	Q2_P18129,Q2_P34224,Q2_P20231,Q2_P16385,Q2_P36646
40412	476	37	Q2_P18130	NO	C800278.1	SJCHGC08685 protein [Schistosoma japonicum] ||ubiquitin specific protease 5 (isopeptidase T) [Mus musculus] gb|AAH66993.1| Ubiquitin specific protease 5 (isopeptidase T) [Mus musculus] sp|P56399|UBP5_MOUSE Ubiquitin carboxyl-terminal hydrolase 5 (Ubiquitin thiolesterase 5) (Ubiquitin-specific processing protease 5) (Deubiquitinating enzyme 5) (Isopeptidase T) gb|AAC36015.1| ISOT [Mus musculus] ||…	TATTTCCTCGTATGCCATGAATTTAGCACAAATAAATAATTCTGTTCGGATTCCTCCGTC	0	C800278.1	Smp_069960			Plus / Plus	Plus / Plus	Sense	CAZ34444.1	ubiquitin-specific peptidase 5 (C19 family) [Schistosoma mansoni]	1e-177	NP_003472	>gi|148727247|ref|NP_003472.2| ubiquitin specific peptidase 5 isoform 2 [Homo sapiens]	Q2_P13799,Q2_P33670,Q2_P18130,Q2_P14499,Q2_P13895,Q2_P01074,Q2_P19196,Q2_P33762,Q2_P34399
16067	190	2	Q2_P00092	NO	C800279.1	preprocathepsin L sp|Q26534|CATL_SCHMA Cathepsin L precursor (SMCL1) prf||2106314A cathepsin L ||cathepsin L1 [Schistosoma japonicum] ||cathepsin L ||SJCHGC00511 protein [Schistosoma japonicum] ||cysteine proteinase PWCP1 [Paragonimus westermani] ||	GATGGGAAGGGGGTGAATAATCTCTTTTGAACAATTGCCTTTCTAATTTCATTAATCTCA	0	C800279.1	Smp_034410.1			Plus / Minus	Plus / Minus	Sense	CAZ31125.1	cathepsin F (C01 family) [Schistosoma mansoni]	3.8e-79	NP_003784	>gi|6042196|ref|NP_003784.2| cathepsin F [Homo sapiens]
34737	409	57	Q2_P18131	NO	C800280.1	PREDICTED: similar to PHD finger protein 10 (XAP135) [Strongylocentrotus purpuratus] ||SJCHGC08902 protein [Schistosoma japonicum] ||PREDICTED: similar to PHD finger protein 10 isoform 2 [Bos taurus] ||PREDICTED: similar to PHD finger protein 10 isoform 1 [Bos taurus] ||PREDICTED: similar to PHD finger protein 10 (XAP135) isoform 3 [Canis familiaris] ||	TCATACCTTCCATTATCACGTGTTCTATATCCACATCCACTACGAAAACATAGAAATCCA	0	C800280.1	Smp_000150			Plus / Plus	Plus / Plus	Sense	CAZ27696.1	similar to PHD finger protein 10 isoform a; PHD zinc finger protein XAP135-related [Schistosoma mansoni]	7.1e-65	NP_060758	>gi|194328734|ref|NP_060758.2| PHD finger protein 10 isoform a [Homo sapiens]	Q2_P18131,Q2_P29370,Q2_P27030,Q2_P07353,Q2_P07343,Q2_P09625
37407	441	7	Q2_P18132	NO	C800281.1	SJCHGC03865 protein [Schistosoma japonicum] ||	GGATCCCTACAAACTGTATTACATTCATTAGCTTCTATGGTTATGCCTACTAGACATTTT	0	C800281.1	Smp_135540			Plus / Plus	Plus / Plus	Sense	CAZ30143.1	Protein VTS1, putative [Schistosoma mansoni]				Q2_P18132,Q2_P39654,Q2_P38086,Q2_P17639,Q2_P38513
10987	130	22	Q2_P18133	NO	C800282.1	none	TACACCACCACCCAATGATTCACATAATTCTTCTACACATTGTTCAACTAAATCTGCTGT	0	C800282.1	Smp_169290			Plus / Plus	Plus / Plus	Sense	CAZ35991.1	expressed protein [Schistosoma mansoni]				Q2_P34322,Q2_P14431,Q2_P00893,Q2_P18133,Q2_P28879,Q2_P22176,Q2_P02966,Q2_P09148,Q2_P00093
14834	175	44	Q2_P18134	NO	C800283.1	none	ACTTTGACGAATGTAAAACAAAGTGCTACGAAATGGCGGGACGTTGAATTCCCAAAACAG	0	C800283.1	Smp_138070			Plus / Plus	Plus / Plus	Sense	CAZ30617.1	hypothetical protein [Schistosoma mansoni]
13337	157	77	Q2_P18135	NO	C800284.1	PREDICTED: similar to RIKEN cDNA 5430428G01 [Rattus norvegicus] ref|NP_001014198.1| hypothetical protein LOC362031 [Rattus norvegicus] gb|AAH79151.1| Hypothetical LOC362031 [Rattus norvegicus] ||Hypothetical protein LOC66789 [Mus musculus] ref|NP_077140.1| hypothetical protein LOC66789 [Mus musculus] dbj|BAB27807.1| unnamed protein product [Mus musculus] ||hypothetical protein LOC199857 [Homo sap…	ATTTTGTGTAATGGTCCTGGGACATGTATCCCCATATGCTTCGTGGCTATTTTACTTCAC	0	C800284.1	Smp_045430.3			Plus / Plus	Plus / Plus	Sense	CAZ32099.1	glycosyltransferase-related [Schistosoma mansoni]	4.5e-44	NP_659425	>gi|21450685|ref|NP_659425.1| asparagine-linked glycosylation 14 homolog [Homo sapiens]	Q2_P31934,Q2_P18135,Q2_P36245,Q2_P12121
30724	362	39	Q2_P18136	NO	C800285.1	PREDICTED: similar to beta prime cop [Gallus gallus] ||Hypothetical protein LOC613110 [Xenopus tropicalis] ref|NP_001027518.1| hypothetical protein LOC613110 [Xenopus tropicalis] ||Wu:fc55e05-prov protein [Xenopus laevis] ||hypothetical protein [Pongo pygmaeus] ||Coatomer protein complex subunit beta 2 (beta prime) [Rattus norvegicus] ||	ATTAGCTTTACAATGAGGAGATTTTGAATTATGCCAACAAAGAGCCAGGATGTGAGCTCA	0	C800285.1	Smp_015090			Plus / Plus	Plus / Plus	Sense	CAZ29212.1	coatomer beta subunit, putative [Schistosoma mansoni]	0.0	NP_004757	>gi|4758032|ref|NP_004757.1| coatomer protein complex, subunit beta 2 (beta prime) [Homo sapiens]
8734	103	64	Q2_P18137	NO	C800286.1	SJCHGC09277 protein [Schistosoma japonicum] ||PREDICTED: similar to dihydropyrimidine amidohydrolase [Apis mellifera] ||MGC68668 protein [Xenopus laevis] ||MGC108299 protein [Xenopus tropicalis] gb|AAH89704.1| MGC108299 protein [Xenopus tropicalis] ||collapsin response mediator protein-3B [Gallus gallus] ||	CAAAATATCCAAAGAAATGGAGCTACTAGTCAAAGAAAAGGGAGTGAATTCTTTTAGGGT	0	C800286.1	Smp_085110.2			Plus / Plus	Plus / Plus	Sense	CAZ35850.1	dihydropyrimidinase related protein-2 (M38 family) [Schistosoma mansoni]	2e-147	NP_001377	>gi|4503377|ref|NP_001377.1| dihydropyrimidinase-like 2 [Homo sapiens]	Q2_P18137,Q2_P26953,Q2_P22970
37705	444	50	Q2_P18138	NO	C800287.1	SJCHGC06163 protein [Schistosoma japonicum] ||similar to NM_076646 Aspartate aminotransferase in Caenorhabditis elegans [Schistosoma japonicum] ||aspartate aminotransferase [Aedes aegypti] ||Hypothetical protein C14F11.1a [Caenorhabditis elegans] ref|NP_741810.1| C14F11.1a [Caenorhabditis elegans] ||Hypothetical protein C14F11.1b [Caenorhabditis elegans] ref|NP_741811.1| C14F11.1b [Caenorhabditis…	CTTTAACAGTTGCTGAAGGATGTGGCAGATGTGTTACTAAAACAGTTCATTAGCTGTTAG	0	C800287.1	Smp_064380			Plus / Plus	Plus / Plus	Sense	CAZ33926.1	branched-chain amino acid aminotransferase [Schistosoma mansoni]	4e-121	NP_002071	>gi|73486658|ref|NP_002071.2| aspartate aminotransferase 2 precursor [Homo sapiens]	Q2_P16841,Q2_P37179,Q2_P32993,Q2_P05944,Q2_P18138,Q2_P35834,Q2_P13143
17229	203	59	Q2_P18139	NO	C800288.1	GA20400-PA [Drosophila pseudoobscura] ||dynein cytoplasmic heavy chain 1 [Rattus norvegicus] sp|P38650|DYHC_RAT Dynein heavy chain cytosolic (DYHC) (Cytoplasmic dynein heavy chain) (MAP 1C) dbj|BAA02996.1| cytoplasmic dynein heavy chain [Rattus norvegicus] ||dynein heavy chain ||dynein cytoplasmic heavy chain 1 [Mus musculus] gb|AAF91078.1| cytoplasmic dynein heavy chain [Mus musculus] sp|Q9JHU4|…	TGGTGTCAGCATTTACAATCTGTTGGTATCCATTTCCGTAATGATCTGGCTTTAGTAGAG	0	C800288.1	Smp_157410			Plus / Plus	Plus / Plus	Sense	CAZ34021.1	expressed protein [Schistosoma mansoni]	0.0	NP_001367	>gi|33350932|ref|NP_001367.2| cytoplasmic dynein 1 heavy chain 1 [Homo sapiens]	Q2_P19345,Q2_P13315,Q2_P21511,Q2_P02167,Q2_P19261,Q2_P18139,Q2_P02379,Q2_P28889,Q2_P28867,Q2_P23324,Q2_P25987,Q2_P26025,Q2_P19282
26241	309	61	Q2_P18140	NO	C800289.1	SJCHGC04489 protein [Schistosoma japonicum] ||Hypothetical protein LOC613075 [Xenopus tropicalis] ref|NP_001027483.1| hypothetical protein LOC613075 [Xenopus tropicalis] ||unnamed protein product [Tetraodon nigroviridis] ||PREDICTED: similar to KIAA1761 protein [Gallus gallus] ||unnamed protein product [Mus musculus] ||	GGAAATTTCGGTGATTGTGAATTAGAGGAAGATCAAATAACATGGGCTAGACATAATGTT	0	C800289.1	Smp_169400			Plus / Plus	Plus / Plus	Sense	CAZ36008.1	expressed protein [Schistosoma mansoni]	4.8e-46	NP_149079	>gi|56790935|ref|NP_149079.2| hypothetical protein LOC85369 [Homo sapiens]	Q2_P18140,Q2_P13221
24170	285	30	Q2_P18141	NO	C800290.1	SJCHGC08547 protein [Schistosoma japonicum] ||Ubiquitin-like 1 (sentrin) activating enzyme E1B [Danio rerio] ref|NP_998528.1| ubiquitin-like 1 (sentrin) activating enzyme E1B [Danio rerio] ||PREDICTED: similar to Ubiquitin-like 1 (sentrin) activating enzyme E1B isoform 1 [Danio rerio] ||SUMO-1 activating enzyme subunit 2 [Homo sapiens] ref|NP_005490.1| SUMO-1 activating enzyme subunit 2 [Homo sap…	GACTAATGATGAATTGTTGCCGGCTAAAAACGATCTTACCAATAAATCTGATGATGTGTT	0	C800290.1	Smp_166220			Plus / Plus	Plus / Plus	Sense	CAZ35502.1	ubiquitin-activating enzyme E1b, putative [Schistosoma mansoni]	1.1e-92	NP_005490	>gi|4885649|ref|NP_005490.1| SUMO-1 activating enzyme subunit 2 [Homo sapiens]	Q2_P21682,Q2_P27818,Q2_P34203,Q2_P18141
9012	107	2	Q2_P18142	NO	C800291.1	PREDICTED: similar to ENSANGP00000011012 [Apis mellifera] ||SJCHGC05549 protein [Schistosoma japonicum] ||54 kDa vacuolar H(+)-ATPase subunit [Sus scrofa] ||ATPase H+ transporting lysosomal 50/57kDa V1 subunit H isoform 1 [Homo sapiens] gb|AAG39293.1| MSTP042 [Homo sapiens] ||ATPase H+ transporting lysosomal V1 subunit H [Bos taurus] gb|AAI03433.1| ATPase H+ transporting lysosomal V1 subunit H [B…	GTTGGTGTTGTTGTTGCTATAGTTAATCCTTCATGATGATTCTCTCGTTCTTGAAATCAA	0	C800291.1	Smp_015070.1			Plus / Plus	Plus / Plus	Sense	CAZ29209.1	vacuolar ATP synthase subunit h, putative [Schistosoma mansoni]	7e-40	NP_998784	>gi|47717100|ref|NP_998784.1| ATPase, H+ transporting, lysosomal 50/57kDa, V1 subunit H isoform 2 [Homo sapiens]
40282	474	77	Q2_P18143	NO	C800293.1	hypothetical protein LOC335642 [Danio rerio] gb|AAH45418.1| Hypothetical protein LOC335642 [Danio rerio] ||unnamed protein product [Tetraodon nigroviridis] ||Leucine zipper domain protein [Homo sapiens] emb|CAB66610.1| hypothetical protein [Homo sapiens] emb|CAG38578.1| FLJ22386 [Homo sapiens] dbj|BAB15331.1| unnamed protein product [Homo sapiens] ref|NP_078865.1| leucine zipper domain protein [H…	GACTACAGGAGACTTTATCCTATTTAGATGCAGCTATGAACACCTTAATGTATCTAATGA	0	C800293.1	Smp_136980			Plus / Plus	Plus / Plus	Sense	CAZ30407.1	expressed protein [Schistosoma mansoni]				Q2_P18143,Q2_P27591,Q2_P07944
38483	453	63	Q2_P18144	NO	C800294.1	none	AAACAGTTCTACAACACCATCGCATTTACTAAAACTGGGGAATATTCTGGACGAATGCAA	0	C800294.1	Smp_134250			Plus / Plus	Plus / Plus	Sense	CAZ29921.1	heparan sulfate n-deacetylase/n-sulfotransferase, putative [Schistosoma mansoni]	1e-143	NP_003626	>gi|4505353|ref|NP_003626.1| heparan glucosaminyl N-deacetylase/N-sulfotransferase 2 [Homo sapiens]	Q2_P32731,Q2_P00095,Q2_P06758,Q2_P30657,Q2_P10860,Q2_P18144
2536	30	71	Q2_P00096	NO	C800295.1	SJCHGC06950 protein [Schistosoma japonicum] ||PREDICTED: similar to MGC68875 protein [Gallus gallus] ||hypothetical protein AN6139.2 [Aspergillus nidulans FGSC A4] gb|AAD37345.1| AtaAp [Emericella nidulans] gb|EAA57925.1| hypothetical protein AN6139.2 [Aspergillus nidulans FGSC A4] ||1-acylglycerol-3-phosphate acyltransferase (AtaAp) putative [Aspergillus fumigatus Af293] ref|XP_755194.1| 1-acylg…	CCGTCCGAAAAATTTTTAGAGTGATTTATGTACCCCCCAAACCACAAAAATTATACCTAA	0	C800295.1	Smp_000070			Plus / Minus	Plus / Minus	Sense	CAZ27684.1	1-acyl-sn-glycerol-3-phosphate o-acyltransferase [Schistosoma mansoni]	3.8e-34	NP_006402	>gi|5453718|ref|NP_006402.1| 1-acylglycerol-3-phosphate O-acyltransferase 1 [Homo sapiens]
11073	131	23	Q2_P18145	NO	C800296.1	SJCHGC05819 protein [Schistosoma japonicum] ||PREDICTED: similar to Long-chain-fatty-acid--CoA ligase 5 (Long-chain acyl-CoA synthetase 5) (LACS 5) isoform 3 [Canis familiaris] ref|XP_864668.1| PREDICTED: similar to Long-chain-fatty-acid--CoA ligase 5 (Long-chain acyl-CoA synthetase 5) (LACS 5) isoform 2 [Canis familiaris] ref|XP_535014.2| PREDICTED: similar to Long-chain-fatty-acid--CoA ligase 5…	GTACATTCTCTGGTTATACTATTGTACCATTGTATGATACTTTAGGCGAGGAAGCTATTT	0	C800296.1	Smp_165850			Plus / Plus	Plus / Plus	Sense	CAZ35451.1	long-chain-fatty-acid--CoA ligase [Schistosoma mansoni]	4e-65	NP_057318	>gi|42794756|ref|NP_057318.2| acyl-CoA synthetase long-chain family member 5 isoform a [Homo sapiens]	Q2_P02078,Q2_P21062,Q2_P18145,Q2_P37251,Q2_P37223,Q2_P16905,Q2_P16880
39113	461	13	Q2_P00097	NO	C800297.1	none	CTACAAGTACACATATACCAGTTTCATCGCCATCTATAGATACATCATCAATATCAACTG	0	C800297.1	Smp_138150			Plus / Minus	Plus / Minus	Sense	CAZ30630.1	rho-type gtpase activating protein, putative [Schistosoma mansoni]	3.5e-49	NP_872584	>gi|33188433|ref|NP_872584.1| deleted in liver cancer 1 isoform 1 [Homo sapiens]	Q2_P03461,Q2_P34058,Q2_P14180,Q2_P18146,Q2_P00097,Q2_P08282,Q2_P10715,Q2_P30500,Q2_P30551,Q2_P10762,Q2_P27972,Q2_P01696
14696	173	76	Q2_P18147	NO	C800298.1	SJCHGC03176 protein [Schistosoma japonicum] ||	CAACTACCACTCGAAATTCAACTCCTGTAACTATTATCAATGCAGGGCCGCAACAAACAT	0	C800298.1	Smp_142650.3			Plus / Plus	Plus / Plus	Sense	CAZ31378.1	expressed protein [Schistosoma mansoni]	3.8e-29	NP_060120	>gi|93204861|ref|NP_060120.2| protein phosphatase 1, regulatory (inhibitor) subunit 9A [Homo sapiens]	Q2_P00010,Q2_P17896,Q2_P08952,Q2_P28663,Q2_P18147
2342	28	47	Q2_P18148	NO	C800299.1	none	GTGCTCAATACACAGATTCTCATGAAGCATTTTTCAGATCACTTAAGTGTTTTTGGTCAT	0	C800299.1	Smp_043110			Plus / Plus	Plus / Plus	Sense	CAZ31889.1	expressed protein [Schistosoma mansoni]
30972	365	32	Q2_P18149	NO	C800300.1	none	GCTACAGCACTAAGTGGCGAGCGAACTAGATCCAGTATTACTGTTAAAAGTGAGAAAAAA	0	C800300.1	Smp_129560			Plus / Plus	Plus / Plus	Sense	CAZ29075.1	expressed protein [Schistosoma mansoni]				Q2_P18149,Q2_P24098,Q2_P00099
42092	496	17	Q2_P18150	NO	C800301.1	hypothetical protein DDB0167841 [Dictyostelium discoideum] gb|AAO51818.1| similar to Kaposi s sarcoma-associated herpesvirus (KSHV) (Human herpesvirus 8). ORF73 homolog [Dictyostelium discoideum] gb|EAL70030.1| hypothetical protein DDB0167841 [Dictyostelium discoideum] ||hypothetical protein [Neurospora crassa] ref|XP_330041.1| hypothetical protein [Neurospora crassa] gb|EAA34907.1| hypothetical …	CGCATCAATTAAACAGTACAACAACAATTACACCGACAACTAGTTCCATTGTCGCTTAGC	0	C800301.1	Smp_152900			Plus / Plus	Plus / Plus	Sense	CAZ33259.1	wnt related [Schistosoma mansoni]	1.9e-43	NP_005421	>gi|4885655|ref|NP_005421.1| wingless-type MMTV integration site family, member 1 precursor [Homo sapiens]	Q2_P13804,Q2_P03062,Q2_P10241,Q2_P13058,Q2_P30013,Q2_P18150
13885	164	30	Q2_P18151	NO	C800302.1	SJCHGC04900 protein [Schistosoma japonicum] ||	CTTATTGTGGAAGTTATGAAGTCAGCCGTGTATTACAATCATTGACAAAAAGTCAAAAGC	0	C800302.1	Smp_168200			Plus / Plus	Plus / Plus	Sense	CAZ35831.1	expressed protein [Schistosoma mansoni]				Q2_P06981,Q2_P18151
38809	457	49	Q2_P18152	NO	C800303.1	CG7147-PB isoform B [Drosophila melanogaster] gb|AAF53318.1| CG7147-PA isoform A [Drosophila melanogaster] ref|NP_723825.1| CG7147-PB isoform B [Drosophila melanogaster] ref|NP_477187.1| CG7147-PA isoform A [Drosophila melanogaster] ||CG7147-PC isoform C [Drosophila melanogaster] ref|NP_001014481.1| CG7147-PC isoform C [Drosophila melanogaster] ||SD03071p [Drosophila melanogaster] ||symbol=kuz sy…	GTGGAACAATGTCTAAGTGTCCACCTGTTGACATTTTACCAGATGGTACTCTTTGTCAGG	0	C800303.1	Smp_145900			Plus / Plus	Plus / Plus	Sense	CAZ31969.1	Kuzbanian peptidase (M12 family); dihydroceramide desaturase [Schistosoma mansoni]	2.6e-82	NP_001101	>gi|4557251|ref|NP_001101.1| ADAM metallopeptidase domain 10 [Homo sapiens]	Q2_P21346,Q2_P18152,Q2_P28420,Q2_P08709,Q2_P26182
5742	68	47	Q2_P00100	NO	C800304.1	SJCHGC09543 protein [Schistosoma japonicum] ||SJCHGC02418 protein [Schistosoma japonicum] ||PREDICTED: hypothetical protein XP_783518 [Strongylocentrotus purpuratus] ||PREDICTED: hypothetical protein XP_575892 [Rattus norvegicus] ||unnamed protein product [Mus musculus] ||	CCTTTAGTAGATGAAATTGTTTCTGAAGCAATGGGTCCAGTTTTACATGAGGAATTCATT	0	C800304.1	Smp_135270			Plus / Minus	Plus / Minus	Sense	CAZ30096.1	expressed protein [Schistosoma mansoni]	2.3e-66	NP_001139108	>gi|224500884|ref|NP_001139108.1| hypothetical protein LOC339541 [Homo sapiens]	Q2_P02094,Q2_P21128,Q2_P32873,Q2_P03434,Q2_P22725,Q2_P14366,Q2_P34258,Q2_P00100,Q2_P12007,Q2_P31831,Q2_P11688,Q2_P31489,Q2_P37738,Q2_P17335,Q2_P21075
12208	144	53	Q2_P18153	NO	C800305.1	SJCHGC03792 protein [Schistosoma japonicum] ||	CATGACGATGATATAAATAGCACAGAGCATACCAAAAATGAGAGTATTTATGAACAAGCC	0	C800305.1	Smp_056900			Plus / Plus	Plus / Plus	Sense	CAZ33221.1	ribonuclease pH related [Schistosoma mansoni]				Q2_P18153
6252	74	47	Q2_P18154	NO	C800306.1	hypothetical protein [Pongo pygmaeus] ref|XP_341670.2| PREDICTED: similar to ATP-binding cassette sub-family E member 1 (RNase L inhibitor) (Ribonuclease 4 inhibitor) (RNS4I) [Rattus norvegicus] ||PREDICTED: similar to ATP-binding cassette sub-family E member 1 (RNase L inhibitor) (Ribonuclease 4 inhibitor) (RNS4I) [Pan troglodytes] gb|AAZ38723.1| ATP-binding cassette sub-family E (OABP) member 1…	GCGACCCAACCTAAAGTACCTCGACCCAGTAATGATACTGGTGCTGATGGAGAACTAAGT	0	C800306.1	Smp_124460			Plus / Plus	Plus / Plus	Sense	CAZ28123.1	ATP-binding cassette, sub-family E (oabp), member, putative [Schistosoma mansoni]	1e-20	NP_002931	>gi|108773782|ref|NP_002931.2| ATP-binding cassette, sub-family E, member 1 [Homo sapiens]	Q2_P18154
11750	139	20	Q2_P18155	NO	C800307.1	unnamed protein product [Tetraodon nigroviridis] ||	GAGAATAGACAACAATTACAGGTGATACTACGTACTCAATCATCGATTGGTTCTTTGCCT	0	C800307.1	Smp_194920			Plus / Plus	Plus / Plus	Sense	CAZ31321.1	T-cell immunomodulatory protein [Schistosoma mansoni]	2.9e-38	NP_110417	>gi|21361933|ref|NP_110417.2| integrin alpha FG-GAP repeat containing 1 [Homo sapiens]	Q2_P18155
24690	291	40	Q2_P00101	NO	C800308.1	similar to GenBank Accession Number AF157324 RER1 protein in Homo sapiens [Schistosoma japonicum] ||SJCHGC04752 protein [Schistosoma japonicum] ||RER1 protein [Homo sapiens] ||MGC83321 protein [Xenopus laevis] ||hypothetical protein LOC496955 [Xenopus tropicalis] gb|AAH88589.1| Hypothetical LOC496955 [Xenopus tropicalis] ||	GAGACCTATGGGATCAAACAATAAGGAACAACCATCTCCTGTGATTAATTCATGATTTAT	0	C800308.1	Smp_099690			Plus / Minus	Plus / Minus	Sense	CAZ37018.1	RER1 protein, putative [Schistosoma mansoni]	1.3e-40	NP_008964	>gi|116812591|ref|NP_008964.3| RER1 retention in endoplasmic reticulum 1 [Homo sapiens]	Q2_P00101,Q2_P21594
497	6	72	Q2_P18156	NO	C800309.1	none	GGAAGGCAAGATACTGTTCAAAAGACTAACTCTAGAATGGTAGTTATAAGTATGGTGTTA	0	C800309.1	Smp_024180.1			Plus / Plus	Plus / Plus	Sense	CAZ30092.1	Placenta-specificprotein 8 protein (C15 protein), putative [Schistosoma mansoni]				Q2_P00102,Q2_P18156
28039	330	74	Q2_P18157	NO	C800310.1	unnamed protein product [Tetraodon nigroviridis] ||PREDICTED: similar to Ltrpc5 protein partial [Danio rerio] ||PREDICTED: similar to carbonic anhydrase XII isoform 2 precursor carbonic dehydratase [Gallus gallus] ||carbonic anhydrase 4 [Oncorhynchus mykiss] ||unnamed protein product [Tetraodon nigroviridis] ||	GCTTCTTCTTCTAGACCGAAATTCTTACCCTTCCAGTCTTTGAGTGAAAAGAAGAAAAAA	0	C800310.1	Smp_168730			Plus / Plus	Plus / Plus	Sense	CAZ35915.1	carbonic anhydrase, putative [Schistosoma mansoni]	3.5e-29	NP_001209	>gi|4502515|ref|NP_001209.1| carbonic anhydrase XII isoform 1 precursor [Homo sapiens]	Q2_P18157
7655	91	5	Q2_P18158	NO	C800311.1	SJCHGC09437 protein [Schistosoma japonicum] ||	AATGTTGGGAATACCGTGAAGATGTAGATATCTATCGTGAATATTTGGGAATCTTAGAAC	0	C800311.1	Smp_012780			Plus / Plus	Plus / Plus	Sense	CAZ28976.1	sarm1, putative [Schistosoma mansoni]	7e-100	NP_055892	>gi|154090976|ref|NP_055892.2| sterile alpha and TIR motif containing 1 [Homo sapiens]	Q2_P40050,Q2_P18158,Q2_P25992,Q2_P37245,Q2_P16898,Q2_P16899,Q2_P37244
8952	106	27	Q2_P18159	NO	C800312.1	SJCHGC06483 protein [Schistosoma japonicum] ||hypothetical protein [Schistosoma japonicum] ||	ATGCAAGCACTTACTTTGATATTGACACTAGAGATGTTCAGACACAATATGTTTCAGAGG	0	C800312.1	Smp_167700			Plus / Plus	Plus / Plus	Sense	CAZ35735.1	hypothetical protein [Schistosoma mansoni]				Q2_P18159,Q2_P14974,Q2_P34898
40766	480	51	Q2_P18160	NO	C800313.1	ankyrin repeat and FYVE domain containing 1 [Mus musculus] dbj|BAC67388.1| ankyrin repeat hooked to a zinc finger motif short form [Mus musculus] dbj|BAA24980.2| Ankhzn [Mus musculus] ||ankyrin repeat hooked to a zinc finger motif long form [Mus musculus] ||ankyrin repeat hooked to a zinc finger motif long form [Mus musculus] sp|Q810B6|ANFY1_MOUSE Ankyrin repeat and FYVE domain protein 1 (Ankyrin…	CAATTGAACTTGGAAGAGATGACACAGTTTTATCTTTGCTTAACGTTGATCATCCAAAGG	0	C800313.1	Smp_132450.2			Plus / Plus	Plus / Plus	Sense	CAZ29555.1	ankyrin repeat and fyve domain containing, putative [Schistosoma mansoni]	6e-128	NP_057460	>gi|110815813|ref|NP_057460.3| ankyrin repeat and FYVE domain containing 1 isoform 1 [Homo sapiens]	Q2_P38675,Q2_P40956,Q2_P19043,Q2_P18160,Q2_P38734,Q2_P40199,Q2_P10716,Q2_P30501,Q2_P29936,Q2_P31432,Q2_P39359,Q2_P04155,Q2_P08415,Q2_P28122,Q2_P39349,Q2_P00645
1000	12	65	Q2_P18161	NO	C800314.1	hypothetical protein [Schistosoma japonicum] ||unknown [Schistosoma japonicum] ||	GTGAGACAATAACCCTGCGTGATGATGTCTATGAAAATAAAATCATAACATGTCCCAATT	0	C800314.1	Smp_094470			Plus / Plus	Plus / Plus	Sense	CAZ36608.1	conserved hypothetical protein [Schistosoma mansoni]
14365	169	85	Q2_P18162	NO	C800315.1	catenin (cadherin associated protein) alpha 1 [Mus musculus] dbj|BAE35001.1| unnamed protein product [Mus musculus] dbj|BAE28588.1| unnamed protein product [Mus musculus] gb|AAH48163.1| Catenin (cadherin associated protein) alpha 1 [Mus musculus] dbj|BAB23418.1| unnamed protein product [Mus musculus] dbj|BAA14376.1| cadherin associated protein [Mus musculus] sp|P26231|CTN1_MOUSE Alpha-1 catenin (…	CCGTAGGAAAATCGAGTCTGCCAGCTATGTGCTTAGAAATAATACGCCTTTATTACATAC	0	C800315.1	Smp_130900			Plus / Plus	Plus / Plus	Sense	CAZ29302.1	alpha catenin, putative [Schistosoma mansoni]	1.4e-97	NP_004380	>gi|55770846|ref|NP_004380.2| catenin, alpha 2 [Homo sapiens]	Q2_P15590,Q2_P25618,Q2_P18162,Q2_P35567
37302	439	72	Q2_P18163	NO	C800316.1	SJCHGC01869 protein [Schistosoma japonicum] ||unknown [Schistosoma japonicum] ||Prosaposin [Danio rerio] ||Prosaposin [Danio rerio] ||lysosomal cofactor/neurotrophic factor prosaposin [Danio rerio] ||	GCAGTTCCAATGGTTGGACAACCTATCCACCAAGTAATCAGAATAAATTATTTAAATCAC	0	C800316.1	Smp_000260			Plus / Plus	Plus / Plus	Sense	CAZ27710.1	saposin containing protein [Schistosoma mansoni]	2e-43	NP_002769	>gi|11386147|ref|NP_002769.1| prosaposin isoform a preproprotein [Homo sapiens]	Q2_P33039,Q2_P41665,Q2_P18163
37095	437	35	Q2_P18164	NO	C800317.1	N-acylsphingosine amidohydrolase (non-lysosomal ceramidase) 2 [Homo sapiens] ||N-acylsphingosine amidohydrolase 2 [Rattus norvegicus] dbj|BAB62033.1| ceramidase [Rattus norvegicus] ||Unknown (protein for MGC:129777) [Homo sapiens] ||PREDICTED: similar to neutral/alkaline ceramidase [Pan troglodytes] ||neutral/alkaline ceramidase [Homo sapiens] ||	CTAGCATCAATCGTAGTCCAGCGGCTTATTTAGAGAATCCAGTAGAAGAACAAGCTCGGT	0	C800317.1	Smp_147460			Plus / Plus	Plus / Plus	Sense	CAZ32276.1	ceramidase [Schistosoma mansoni]	7e-165	NP_063946	>gi|221218981|ref|NP_063946.2| N-acylsphingosine amidohydrolase 2 isoform a [Homo sapiens]	Q2_P18164,Q2_P18557,Q2_P07938,Q2_P27585,Q2_P41669
30656	361	56	Q2_P18165	NO	C800318.1	SJCHGC05875 protein [Schistosoma japonicum] ||	GATTCATCAATGAGTGCAACAAGTTGGACAAGTTCAAATGATCCTGATCTAATTACAAAC	0	C800318.1	Smp_092020			Plus / Plus	Plus / Plus	Sense	CAZ36450.1	cement precursor protein 3B variant 2, putative [Schistosoma mansoni]				Q2_P18165
26614	314	9	Q2_P18166	NO	C800319.1	calcium ATPase 2 [Schistosoma mansoni] ||calcium-ATPase [Mizuhopecten yessoensis] ||sarco/endoplasmic reticulum-type Ca-2+-ATPase [Placopecten magellanicus] ||sarco(endo)plasmic reticulum-type calcium ATPase [Heliothis virescens] ||CG3725-PA isoform A [Drosophila melanogaster] ref|NP_476832.1| CG3725-PA isoform A [Drosophila melanogaster] ||	TCTGTGAAGTACATGTTACTGTATGGTTTCTTTTCCACCCTTCTCTTTCTTTCCTTTTTT	0	C800319.1	Smp_136710.1			Plus / Plus	Plus / Plus	Sense	CAZ30360.1	calcium-transporting atpase sarcoplasmic/endoplasmic reticulum type (calcium pump), putative [Schistosoma mansoni]	0.0	NP_004311	>gi|10835220|ref|NP_004311.1| ATPase, Ca++ transporting, fast twitch 1 isoform b [Homo sapiens]
24599	290	34	Q2_P18167	NO	C800320.1	SJCHGC03666 protein [Schistosoma japonicum] ||hypothetical protein LOC549071 [Xenopus tropicalis] ||Unknown (protein for MGC:85046) [Xenopus laevis] ||dual specificity phosphatase 19 [Homo sapiens] gb|AAH35000.1| DUSP19 protein [Homo sapiens] gb|AAH93958.1| Dual specificity phosphatase 19 [Homo sapiens] gb|AAY24197.1| unknown [Homo sapiens] gb|AAO49450.1| dual-specificity phosphatase TS-DSP1 [Hom…	GGTTGTTGTTTTATACATTGTGAAGCTGGTATTTCACGTGCACCATCTATTATTATTGCA	0	C800320.1	Smp_084930			Plus / Plus	Plus / Plus	Sense	CAZ35832.1	dual specificity protein phosphatase, putative [Schistosoma mansoni]				Q2_P18167
18254	215	64	Q2_P18168	NO	C800321.1	PREDICTED: similar to ENSANGP00000020068 [Apis mellifera] ||ENSANGP00000027417 [Anopheles gambiae str. PEST] gb|EAA01066.3| ENSANGP00000020068 [Anopheles gambiae str. PEST] ref|XP_321191.2| ENSANGP00000020068 [Anopheles gambiae str. PEST] ref|XP_550942.1| ENSANGP00000027417 [Anopheles gambiae str. PEST] ||ras-related protein RAP-1B homologue [Ciona intestinalis] dbj|BAC57522.1| ras-related protei…	TCGTGAACAGGGTCATGCGCTTAGTCGACAATTAAATTGTTCATTTATGGAAACAAGTGC	0	C800321.1	Smp_142450			Plus / Plus	Plus / Plus	Sense	CAZ31348.1	rap1 and, putative [Schistosoma mansoni]	2e-69	NP_002875	>gi|4506413|ref|NP_002875.1| RAP1A, member of RAS oncogene family [Homo sapiens]	Q2_P18168
27629	326	4	Q2_P18169	NO	C800322.1	At1g75220/F22H5_6 [Arabidopsis thaliana] gb|AAL06513.1| At1g75220/F22H5_6 [Arabidopsis thaliana] gb|AAG12689.1| integral membrane protein putative 33518-36712 [Arabidopsis thaliana] ref|NP_177658.1| integral membrane protein putative [Arabidopsis thaliana] ||10A19I.3 [Oryza sativa (japonica cultivar-group)] ||putative sugar transporter [Oryza sativa (japonica cultivar-group)] ||similar to integra…	CAGAAAATTCTCCTGGAAAAAACTACTACAAGTTGGTGCCGTAATCCTGGCTTTATGCCA	0	C800322.1	Smp_156040			Plus / Plus	Plus / Plus	Sense	CAZ33806.1	sugar transporter, putative [Schistosoma mansoni]	2.8e-86	NP_079285	>gi|50083279|ref|NP_079285.2| centrosome protein 4 [Homo sapiens]	Q2_P18169,Q2_P40666,Q2_P09432,Q2_P29175
11515	136	40	Q2_P18170	NO	C800323.1	SJCHGC09560 protein [Schistosoma japonicum] ||ENSANGP00000017788 [Anopheles gambiae str. PEST] ref|XP_319522.2| ENSANGP00000017788 [Anopheles gambiae str. PEST] ||PREDICTED: similar to ENSANGP00000017788 [Apis mellifera] ||PREDICTED: similar to Leucine zipper-EF-hand containing transmembrane protein 1 mitochondrial precursor [Strongylocentrotus purpuratus] ||PREDICTED: similar to Leucine zipper-E…	CGATCATTCTCAAGTTACTTCAAAGTAGAGGAGTGTTGTTTTCATTGTTGTAGGTGATAA	0	C800323.1	Smp_065110			Plus / Plus	Plus / Plus	Sense	CAZ33996.1	leucine zipper-ef-hand containing transmembrane protein, putative [Schistosoma mansoni]	3.8e-88	NP_036450	>gi|6912482|ref|NP_036450.1| leucine zipper-EF-hand containing transmembrane protein 1 [Homo sapiens]	Q2_P35302,Q2_P22526,Q2_P18170,Q2_P20070,Q2_P30642,Q2_P10538,Q2_P29077,Q2_P10846,Q2_P30319
3468	41	68	Q2_P18171	NO	C800324.1	RAB2 [Lymnaea stagnalis] sp|Q05975|RAB2_LYMST Ras-related protein Rab-2 ||GTP-binding protein ||RAB2 member RAS oncogene family [Homo sapiens] gb|AAV38501.1| RAB2 member RAS oncogene family [Homo sapiens] emb|CAA31411.1| unnamed protein product [Homo sapiens] gb|AAH08929.1| RAB2 member RAS oncogene family [Homo sapiens] emb|CAH92700.1| hypothetical protein [Pongo pygmaeus] dbj|BAE01404.1| unnamed…	CACACACACTTTTGTGGTTGTATTCTTATTTGTTTAACTGTTGAGTCGCTAGCAATAATC	0	C800324.1	Smp_022810.1			Plus / Plus	Plus / Plus	Sense	CAZ29947.1	rab-2,4,14, putative [Schistosoma mansoni]	3.4e-88	NP_002856	>gi|4506365|ref|NP_002856.1| RAB2A, member RAS oncogene family [Homo sapiens]
14246	168	51	Q2_P18172	NO	C800325.1	SJCHGC02680 protein [Schistosoma japonicum] ||Zinc finger protein 259 [Danio rerio] ref|NP_998273.1| zinc finger protein 259 [Danio rerio] ||zinc finger protein 259 [Mus musculus] gb|AAH21397.1| Zinc finger protein 259 [Mus musculus] sp|Q62384|ZPR1_MOUSE Zinc-finger protein ZPR1 (Zinc finger protein 259) gb|AAC52662.1| zinc finger protein ||unnamed protein product [Mus musculus] ||unnamed protein…	AAAATTACTTAGCTCCAAATGACGACCCACAAATTGAGATTGAAACATATGTACGTACTC	0	C800325.1	Smp_134010.1			Plus / Plus	Plus / Plus	Sense						Q2_P18172,Q2_P38373,Q2_P35800
43017	507	7	Q2_P18173	NO	C800326.1	hypothetical protein [Schistosoma sp. CT-2002] ||SJCHGC09270 protein [Schistosoma japonicum] ||	CACCTTACACCGTATTTACTTAGTATAGAGTTGCAACGACATATTTTATCATCGTCATCT	0	C800326.1	Smp_149000			Plus / Plus	Plus / Plus	Sense	CAZ32558.1	protein phosphatase 2C, putative [Schistosoma mansoni]				Q2_P18173,Q2_P38553,Q2_P40682
36902	435	12	Q2_P18174	NO	C800327.1	ENSANGP00000009911 [Anopheles gambiae str. PEST] ref|XP_313991.2| ENSANGP00000009911 [Anopheles gambiae str. PEST] ||Solute carrier family 25 member 19 [Danio rerio] ||CG6608-PB isoform B [Drosophila melanogaster] gb|AAF54575.1| CG6608-PA isoform A [Drosophila melanogaster] ref|NP_731527.1| CG6608-PB isoform B [Drosophila melanogaster] ref|NP_650034.1| CG6608-PA isoform A [Drosophila melanogaster…	GGATTTTCTGGTCTCTTAGCTAAGACAATTGTGTATCCTCTTGATTTAGCTAAAAAACGT	0	C800327.1	Smp_058130.1			Plus / Plus	Plus / Plus	Sense	CAZ33336.1	mitochondrial carrier protein-related [Schistosoma mansoni]	1.5e-42	NP_068380	>gi|186928856|ref|NP_068380.3| solute carrier family 25, member 19 [Homo sapiens]	Q2_P20822,Q2_P18174
4436	53	16	Q2_P18175	NO	C800328.1	SJCHGC04822 protein [Schistosoma japonicum] ||PREDICTED: similar to supervillin isoform 2 isoform 4 [Canis familiaris] ||PREDICTED: similar to supervillin isoform 2 isoform 2 [Canis familiaris] ||PREDICTED: similar to supervillin isoform 2 isoform 1 [Canis familiaris] ||PREDICTED: similar to supervillin isoform 1 isoform 3 [Canis familiaris] ||	TAGTTTTATTCCCTCCTTATGTCAGATTGACAGATGCAATAGCTTATCACCAATTCGAAG	0	C800328.1	Smp_148580			Plus / Plus	Plus / Plus	Sense	CAZ32478.1	supervillin, putative [Schistosoma mansoni]	1e-110	NP_003165	>gi|150417971|ref|NP_003165.2| supervillin isoform 1 [Homo sapiens]	Q2_P14275,Q2_P21417,Q2_P14491,Q2_P18175,Q2_P34158,Q2_P30267,Q2_P10489,Q2_P16543,Q2_P36832,Q2_P16545,Q2_P36836,Q2_P16480,Q2_P37424,Q2_P17066,Q2_P25628,Q2_P06787,Q2_P26394,Q2_P25908,Q2_P03328,Q2_P22607,Q2_P34387
44126	520	11	Q2_P18176	NO	C800329.1	LOC495273 protein [Xenopus laevis] ||DDHD domain containing 1 [Homo sapiens] gb|AAH30703.1| DDHD domain containing 1 [Homo sapiens] ||PREDICTED: similar to Probable phospholipase DDHD1 (DDHD domain protein 1) (Phosphatidic acid-preferring phospholipase A1 homolog) (PA-PLA1) isoform 1 [Canis familiaris] ||PREDICTED: similar to DDHD domain containing 1 isoform 2 [Canis familiaris] ||Probable phosph…	CTGATTACTGGCTGGAATCAAGTCCCCGATAATGATCCATTAACTGAAATCTTATTAAAT	0	C800329.1	Smp_141150			Plus / Plus	Plus / Plus	Sense	CAZ39197.1	phospholipase DDHD1, putative [Schistosoma mansoni]	1e-103	NP_001153619	>gi|237757344|ref|NP_001153619.1| DDHD domain containing 1 isoform b [Homo sapiens]	Q2_P18176,Q2_P13331,Q2_P33171,Q2_P39075,Q2_P00772,Q2_P04967,Q2_P03662,Q2_P22996,Q2_P24524
22612	267	2	Q2_P18177	NO	C800330.1	SJCHGC05098 protein [Schistosoma japonicum] ||Ilk-prov protein [Xenopus laevis] ||MGC82989 protein [Xenopus laevis] ||ENSANGP00000011464 [Anopheles gambiae str. PEST] ref|XP_316598.2| ENSANGP00000011464 [Anopheles gambiae str. PEST] ||integrin-linked kinase [Gallus gallus] gb|AAG18430.1| integrin-linked kinase [Gallus gallus] ||	AGGTTCATTTAGACGGTGTCCAGTAGTCGTAAAAATGTTAAAACTACGAAATTGTTCAAC	0	C800330.1	Smp_079760.1			Plus / Plus	Plus / Plus	Sense	CAZ35325.1	protein kinase [Schistosoma mansoni]	1e-113	NP_004508	>gi|4758606|ref|NP_004508.1| integrin-linked kinase [Homo sapiens]	Q2_P18177
16601	196	26	Q2_P18178	NO	C800331.1	MGC69133 protein [Xenopus laevis] ||PREDICTED: similar to metalloprotease 1 [Canis familiaris] ||pitrilysin metalloproteinase 1 [Homo sapiens] ||PREDICTED: similar to metalloprotease 1 isoform 2 [Danio rerio] ||PREDICTED: similar to metalloprotease 1 isoform 1 [Danio rerio] ||	ACTAACGTACGAGTATCTGAAGGAGTTTCACAATAAGTATTACCATCCGAGCAACTCATG	0	C800331.1	Smp_146140			Plus / Plus	Plus / Plus	Sense	CAZ32001.1	eupitrilysin (M16 family) [Schistosoma mansoni]	0.0	NP_055704	>gi|41352061|ref|NP_055704.2| metalloprotease 1 [Homo sapiens]	Q2_P18178,Q2_P33612,Q2_P13740,Q2_P30742,Q2_P28949,Q2_P31692,Q2_P27164,Q2_P25341,Q2_P10949
9805	116	30	Q2_P00103	NO	C800332.1	SJCHGC01133 protein [Schistosoma japonicum] ||SJCHGC01134 protein [Schistosoma japonicum] ||unnamed protein product [Tetraodon nigroviridis] ||LOC495348 protein [Xenopus laevis] ||dual specificity phosphatase 23 [Homo sapiens] emb|CAH71101.1| novel protein [Homo sapiens] gb|AAH01140.1| Dual specificity phosphatase 23 [Homo sapiens] dbj|BAD12141.1| low-molecular-mass dual-specificity phosphatase 3…	GCTGTGAGACGATATGTGAAATCAATCAAACAGTAATGACGTAAATTGGTTGAAGAAAAC	0	C800332.1	Smp_059290.1			Plus / Minus	Plus / Minus	Sense						Q2_P00103
22675	267	65	Q2_P18179	NO	C800333.1	none	TGTTATGTATGCGCGTATGCAGGTGAGTATGCTATTACTAGTGTGCATATGAACGCGTGG	0	C800333.1	Smp_101370.1			Plus / Plus	Plus / Plus	Sense
28642	337	82	Q2_P18180	NO	C800334.1	SJCHGC05577 protein [Schistosoma japonicum] ||PREDICTED: similar to HECT UBA and WWE domain containing 1 [Strongylocentrotus purpuratus] ||upstream regulatory element binding protein 1 (UREB1) [Homo sapiens] emb|CAI39581.1| upstream regulatory element binding protein 1 (UREB1) [Homo sapiens] ||upstream regulatory element binding protein 1 (UREB1) [Homo sapiens] emb|CAI39578.1| upstream regulatory…	CCTGGCTTTTTACTGTGATGTGATATCATTATGATGTGGGATTTATGTGCATATGAATGT	0	C800334.1	Smp_167690			Plus / Plus	Plus / Plus	Sense	CAZ35731.1	ubiquitin-protein ligase, putative [Schistosoma mansoni]	2e-27	NP_113584	>gi|61676188|ref|NP_113584.3| HECT, UBA and WWE domain containing 1 [Homo sapiens]
24039	283	69	Q2_P18181	NO	C800335.1	none	AGAAAAGCTCTCATCCCAGGGGTGCATTTAAAATGAATCAACATGCTTCTCAAATTCTGA	0	C800335.1	Smp_064250			Plus / Plus	Plus / Plus	Sense	CAY16946.1	conserved hypothetical protein [Schistosoma mansoni]				Q2_P18181,Q2_P39517,Q2_P39390
27794	327	84	Q2_P18182	NO	C800336.1	SJCHGC01733 protein [Schistosoma japonicum] ||PREDICTED: similar to Endonuclease III-like protein 1 [Gallus gallus] ||PREDICTED: similar to Endonuclease III-like protein 1 [Strongylocentrotus purpuratus] ||PREDICTED: similar to endonuclease III homologue [Apis mellifera] ||endonuclease III homologue 1 [Homo sapiens] ||	CCAGTGAATCCAAACTGTAAAGAATGTTTAAATCTATCAATTTGTCCATCTGCGTCGAAA	0	C800336.1	Smp_006710			Plus / Plus	Plus / Plus	Sense	CAZ28381.1	endonuclease III, putative [Schistosoma mansoni]	4e-76	NP_002519	>gi|4505471|ref|NP_002519.1| nth endonuclease III-like 1 [Homo sapiens]	Q2_P18182,Q2_P17513,Q2_P37980
11925	141	25	Q2_P18184	NO	C800338.1	SJCHGC06569 protein [Schistosoma japonicum] ||SJCHGC06351 protein [Schistosoma japonicum] ||PREDICTED: similar to epithelial protein lost in neoplasm [Strongylocentrotus purpuratus] ||PREDICTED: similar to Epithelial protein lost in neoplasm isoform 2 [Bos taurus] ||PREDICTED: similar to Epithelial protein lost in neoplasm [Canis familiaris] ||	GTGTCAGGAATTTCCGATATATAGATTCAGGTTCTCCTTATTTCTGAAATTTCTGTACGT	0	C800338.1	Smp_169700.2			Plus / Plus	Plus / Plus	Sense
9906	117	46	Q2_P18185	NO	C800339.1	PREDICTED: similar to Phenylalanyl-tRNA synthetase mitochondrial precursor (Phenylalanine--tRNA ligase) (PheRS) [Canis familiaris] ||phenylalanine-tRNA synthetase 2 [Homo sapiens] gb|AAH21112.1| Phenylalanine-tRNA synthetase 2 [Homo sapiens] emb|CAI39442.1| phenylalanine-tRNA synthetase 1 (mitochondrial) [Homo sapiens] emb|CAI20375.1| phenylalanine-tRNA synthetase 1 (mitochondrial) [Homo sapiens]…	TTAGAAATGCTACTGATCCTTTTCAATGTTTTCGTCTGCTTGAAGATATTCCATCGTCTT	0	C800339.1	Smp_149430			Plus / Plus	Plus / Plus	Sense	CAZ32646.1	phenylalanyl-tRNA synthetase mitochondrial, putative [Schistosoma mansoni]	3e-109	NP_006558	>gi|5729820|ref|NP_006558.1| phenylalanyl-tRNA synthetase 2 precursor [Homo sapiens]	Q2_P18185,Q2_P40122,Q2_P41358,Q2_P38993
37710	444	55	Q2_P00107	NO	C800340.1	SJCHGC03406 protein [Schistosoma japonicum] ||protein phosphatase methylesterase-1 [Bos taurus] ||PREDICTED: similar to protein phosphatase methylesterase 1 [Strongylocentrotus purpuratus] ||protein phosphatase methylesterase 1 [Mus musculus] gb|AAH14867.1| Protein phosphatase methylesterase 1 [Mus musculus] dbj|BAE26861.1| unnamed protein product [Mus musculus] ||PREDICTED: similar to protein ph…	TGCTTTGAGCTCATTACGTGGCATGACAGCCTTCTTACGTTCTCGTCCTCAAAGTTTTTT	0	C800340.1	Smp_149920			Plus / Minus	Plus / Minus	Sense	CAZ32727.1	protein phosphatase methylesterase 1 (S33 family) [Schistosoma mansoni]	6.3e-77	NP_057231	>gi|7706645|ref|NP_057231.1| protein phosphatase methylesterase 1 [Homo sapiens]	Q2_P35771,Q2_P13583,Q2_P33440,Q2_P35502,Q2_P00107,Q2_P17448,Q2_P33643,Q2_P11051,Q2_P30840,Q2_P05488,Q2_P37892,Q2_P13771
40926	482	41	Q2_P00108	NO	C800341.1	SJCHGC02560 protein [Schistosoma japonicum] ||SJCHGC02561 protein [Schistosoma japonicum] ||	CGGGAAGATACAATTTTTGTCAGTAATCTGCCTCAAAATATTGATCATGATGTGATGAAG	0	C800341.1	Smp_000240.1			Plus / Minus	Plus / Minus	Sense	CAZ27707.1	RNA binding protein, putative [Schistosoma mansoni]				Q2_P00108,Q2_P17128,Q2_P03985,Q2_P11606,Q2_P23350,Q2_P37483
13947	165	7	Q2_P18186	NO	C800342.1	PREDICTED: similar to crystallin gamma S (predicted) [Danio rerio] ||PREDICTED: similar to crystallin gamma S (predicted) [Danio rerio] ||novel protein [Danio rerio] ||Hypothetical protein FLJ10560 [Homo sapiens] ref|NP_060608.1| hypothetical protein LOC55171 [Homo sapiens] dbj|BAA91682.1| unnamed protein product [Homo sapiens] ||PREDICTED: similar to 5730478M09Rik protein [Mus musculus] ref|XP_1…	TAGTTACAGTCGTTCATCCGAGTTGGATTCAGGTCGTTCAACTCCTATCAGACTATGTCG	0	C800342.1	Smp_120920.2			Plus / Plus	Plus / Plus	Sense	CAZ39046.1	expressed protein [Schistosoma mansoni]	2.8e-80	NP_060608	>gi|8922517|ref|NP_060608.1| TBCC domain containing 1 [Homo sapiens]	Q2_P03149,Q2_P34784,Q2_P17796,Q2_P22209,Q2_P38271,Q2_P18186
2739	33	19	Q2_P00109	NO	C800343.1	similar to GenBank Accession Number AJ428489 putative ubiquitin ligase in Taenia solium [Schistosoma japonicum] ||putative ubiquitin ligase [Taenia solium] ||PREDICTED: similar to ring finger protein 185 [Strongylocentrotus purpuratus] ||ring finger protein 185 [Mus musculus] dbj|BAC28589.1| unnamed protein product [Mus musculus] ||hypothetical protein LOC360967 [Rattus norvegicus] gb|AAH92655.1|…	CACAATGGTAATGGCATCAACAACCGAACAATACCACCAGACAATTTTTGGGGAGCTGAT	0	C800343.1	Smp_026260			Plus / Minus	Plus / Minus	Sense	CAZ30293.1	rnf5, putative [Schistosoma mansoni]	2.7e-37	NP_689480	>gi|31542783|ref|NP_689480.2| ring finger protein 185 isoform 1 [Homo sapiens]	Q2_P00109,Q2_P41703,Q2_P08805
1301	16	26	Q2_P18187	NO	C800344.1	SJCHGC02563 protein [Schistosoma japonicum] ||SJCHGC00797 protein [Schistosoma japonicum] ||SJCHGC06012 protein [Schistosoma japonicum] ||SJCHGC08095 protein [Schistosoma japonicum] ||SJCHGC05774 protein [Schistosoma japonicum] ||	GAACTATTGACAGTCTACTCGATGTAACCTATCTTACTTACGATCCACACAGAGGTTTAA	0	C800344.1	Smp_075420			Plus / Plus	Plus / Plus	Sense	CAZ34962.1	hypothetical protein [Schistosoma mansoni]				Q2_P18187
37655	443	85	Q2_P00110	NO	C800345.1	Ubiquinol-cytochrome c reductase complex 14 kDa protein gb|AAC47732.1| ubiquinol-cytochrome C reductase complex ubiquinol binding protein [Schistosoma mansoni] ||similar to GenBank Accession Number U90319 ubiquinol-cytochrome c reductase complex ubiquinol binding protein in Schistosoma mansoni [Schistosoma japonicum] ||ubiquinol cytochrome reductase complex binding protein [Fasciola hepatica] sp|…	ACCTAGCTAAAAACCTTTTTTCTTCGCAGAAAATGTCCATTTTAACGATCCACGCTCGTC	0	C800345.1	Smp_024120			Plus / Minus	Plus / Minus	Sense	CAZ30082.1	Ubiquinol-cytochrome c reductase complex 14 kDa protein, putative [Schistosoma mansoni]				Q2_P18976,Q2_P00110,Q2_P33881,Q2_P14009,Q2_P28125,Q2_P28150,Q2_P08439,Q2_P08417,Q2_P07175
41899	493	79	Q2_P18188	NO	C800346.1	SJCHGC01029 protein [Schistosoma japonicum] ||PNN protein [Danio rerio] ||PNN protein [Danio rerio] ||PNN protein [Danio rerio] ||Sdk2-A-prov protein [Xenopus laevis] ||	CCCTGTTTTTATTTCTCTCACCACTCATCATCAATACACATGATCATTGTCATAGCTTTT	0	C800346.1	Smp_097720			Plus / Plus	Plus / Plus	Sense	CAZ36901.1	pinn, putative [Schistosoma mansoni]				Q2_P18188
34717	409	37	Q2_P18189	NO	C800347.1	LOC432342 protein [Xenopus laevis] sp|Q6IR75|CSN2_XENLA COP9 signalosome complex subunit 2 (Signalosome subunit 2) ||MGC97656 protein [Xenopus tropicalis] gb|AAH90102.1| MGC97656 protein [Xenopus tropicalis] ||ENSANGP00000013098 [Anopheles gambiae str. PEST] ref|XP_314698.1| ENSANGP00000013098 [Anopheles gambiae str. PEST] ||COP9 constitutive photomorphogenic homolog subunit 2 [Homo sapiens] ref|…	TTATTTCCTTACACCGACTTTTCCTCAACGCATAAAAATTACAAAAAGCGTACGATTTGC	0	C800347.1	Smp_020050			Plus / Plus	Plus / Plus	Sense	CAZ29688.1	cop9 signalosome complex subunit, putative [Schistosoma mansoni]	0.0	NP_004227	>gi|4759264|ref|NP_004227.1| COP9 constitutive photomorphogenic homolog subunit 2 isoform 1 [Homo sapiens]
12544	148	49	Q2_P18190	NO	C800348.1	similar to XM_044547 protein associated with PRK1 in Homo sapiens [Schistosoma japonicum] ||	CTAAGTTCATACGTTGCTTGTGATTAGCTGACTACTTTATTCAATTATTTTCCTGCTCCT	0	C800348.1	Smp_105210			Plus / Plus	Plus / Plus	Sense	CAY18133.1	zinc finger protein, putative [Schistosoma mansoni]	8.6e-28	NP_061879	>gi|21359918|ref|NP_061879.2| zinc finger, AN1-type domain 6 [Homo sapiens]	Q2_P18190
19074	225	34	Q2_P18191	NO	C800349.1	v-ral simian leukemia viral oncogene homolog A (ras related) [Xenopus tropicalis] gb|AAH70705.1| RALA protein [Xenopus laevis] gb|AAF86279.1| Ras related small G protein RAL-A [Xenopus laevis] ||hypothetical protein LOC492355 [Danio rerio] gb|AAH85637.1| Zgc:92116 [Danio rerio] ||v-ral simian leukemia viral oncogene homolog B (ras related) [Mus musculus] gb|AAH06907.1| V-ral simian leukemia viral…	CCATATGGCCAGTATACAATATCCGAGAAAAGTGGAAAACTATAAACGAAGAAAAAAGTG	0	C800349.1	Smp_062510.2			Plus / Plus	Plus / Plus	Sense	CAZ33768.1	ral, putative [Schistosoma mansoni]	1e-30	NP_002872	>gi|4506405|ref|NP_002872.1| v-ral simian leukemia viral oncogene homolog B [Homo sapiens]	Q2_P34853,Q2_P19842,Q2_P18191,Q2_P14927
13942	165	2	Q2_P18192	NO	C800350.1	SJCHGC04781 protein [Schistosoma japonicum] ||Na+/Cl- dependent neurotransmitter transporter-like protein [Schistosoma mansoni] ||PREDICTED: similar to solute carrier family 6 member 9 isoform 3 [Strongylocentrotus purpuratus] ||L-proline transport protein - rat sp|P28573|S6A7_RAT Sodium-dependent proline transporter (Solute carrier family 6 member 7) ||proline transporter [Rattus norvegicus] gb|…	GACTTGTTGGATAATTTGTGCATTAGCTGTTATCAAAGGTGTACAATCACTTGGTAAAGT	0	C800350.1	Smp_131890			Plus / Plus	Plus / Plus	Sense	CAY16850.1	sodium/chloride dependent transporter, putative [Schistosoma mansoni]	3e-126	NP_008865	>gi|67782313|ref|NP_008865.2| solute carrier family 6 member 9 isoform 1 [Homo sapiens]	Q2_P36887,Q2_P18192,Q2_P29943,Q2_P28966,Q2_P17811,Q2_P25390,Q2_P38288
449	6	24	Q2_P18195	NO	C800353.1	SJCHGC04874 protein [Schistosoma japonicum] ||	CACGTTTACTCAGTTGTTCATTCACATATTAACAGTAAGTTTGGAGCTAGACTGATTTTC	0	C800353.1	Smp_139840			Plus / Plus	Plus / Plus	Sense	CAZ30937.1	serine-type protease inhibitor, putative [Schistosoma mansoni]				Q2_P18195
9776	116	1	Q2_P18197	NO	C800355.1	plexin A1 [Mus musculus] pir||JC4980 plexin 1 precursor - mouse dbj|BAA13188.1| plexin 1 [Mus musculus] ||unnamed protein product [Mus musculus] ||mKIAA4053 protein [Mus musculus] ||PREDICTED: similar to plexin 1 [Rattus norvegicus] ||unnamed protein product [Homo sapiens] ||	ACTGCATTGGAACGTTCGTTTCATGCATTCAGTCATGCTATGACCTATGCATGTGCACCA	0	C800355.1	Smp_145420			Plus / Plus	Plus / Plus	Sense	CAZ31874.1	plexin, putative [Schistosoma mansoni]	6.6e-24	NP_115618	>gi|49355818|ref|NP_115618.2| plexin A1 [Homo sapiens]	Q2_P18197,Q2_P00736,Q2_P31574,Q2_P10002,Q2_P29757,Q2_P28921
17833	210	68	Q2_P18199	NO	C800357.1	SJCHGC04988 protein [Schistosoma japonicum] ||	CACCTTCATTAAGTGATCATTCGGAAGCTTCATCAATTGTATCACGTGTATTCAATGATA	0	C800357.1	Smp_135160			Plus / Plus	Plus / Plus	Sense	CAZ30071.1	dual specificity protein phosphatase, putative [Schistosoma mansoni]	5.7e-33	NP_009138	>gi|6005812|ref|NP_009138.1| dual specificity phosphatase 10 isoform a [Homo sapiens]	Q2_P25658,Q2_P18199
17771	210	6	Q2_P18200	NO	C800358.1	none	GCTGTGCCTACGAACATTCTGTGATCCAATATTATTACAATCATGCGTTTTGAATTTACA	0	C800358.1	Smp_168040			Plus / Plus	Plus / Plus	Sense	CAZ35805.1	expressed protein [Schistosoma mansoni]
45086	531	36	Q2_P00115	NO	C800359.1	none	GGGTACATTTGGTGGAGGTTCTTTTATATCAGCTGAACAAATGATGACAATGAATATGAA	0	C800359.1	Smp_146750			Plus / Minus	Plus / Minus	Sense	CAZ32127.1	sodium/hydrogen exchanger, putative [Schistosoma mansoni]	3.9e-59	NP_003039	>gi|15529998|ref|NP_003039.2| solute carrier family 9 (sodium/hydrogen exchanger), member 2 [Homo sapiens]	Q2_P00115,Q2_P18201
41022	483	52	Q2_P18202	NO	C800360.1	SJCHGC01195 protein [Schistosoma japonicum] ||PREDICTED: similar to ankyrin repeat and MYND domain containing 2 partial [Strongylocentrotus purpuratus] ||hypothetical protein [Homo sapiens] ||ankyrin repeat and MYND domain containing 2 [Homo sapiens] gb|AAH35353.1| Ankyrin repeat and MYND domain containing 2 [Homo sapiens] gb|EAL24286.1| ankyrin repeat and MYND domain containing 2 [Homo sapiens] …	ATCTGGAAAGAGAAGAAATAGCCATTTATGTGTCGAAGTCCCAATTACTACCTGAACATG	0	C800360.1	Smp_012740.1			Plus / Plus	Plus / Plus	Sense	CAZ28972.1	ankyrin repeat and mynd domain containing, putative [Schistosoma mansoni]	3.4e-31	NP_064715	>gi|28461129|ref|NP_064715.1| ankyrin repeat and MYND domain containing 2 [Homo sapiens]	Q2_P18202,Q2_P28764,Q2_P09040
5417	64	62	Q2_P18203	NO	C800361.1	SJCHGC06136 protein [Schistosoma japonicum] ||hypothetical protein LOC77877 [Mus musculus] dbj|BAC38275.1| unnamed protein product [Mus musculus] dbj|BAC29215.1| unnamed protein product [Mus musculus] dbj|BAC30044.1| unnamed protein product [Mus musculus] dbj|BAC35665.1| unnamed protein product [Mus musculus] ||unnamed protein product [Mus musculus] ||Hypothetical protein LOC496505 [Xenopus tropi…	AGTCCGGCTGAAGTTGATGAAAATTGTCACTCGTCAAACACTTCACAGTATTCTATGGAA	0	C800361.1	Smp_002840			Plus / Plus	Plus / Plus	Sense	CAZ27981.1	expressed protein [Schistosoma mansoni]	1.3e-27	NP_060826	>gi|170763486|ref|NP_060826.2| hypothetical protein LOC55322 [Homo sapiens]	Q2_P38860,Q2_P18203
3250	39	20	Q2_P00116	NO	C800362.1	SJCHGC07771 protein [Schistosoma japonicum] ||PREDICTED: similar to CG8110-PA isoform A [Apis mellifera] ||PREDICTED: similar to sperm associated antigen 9 isoform 1 partial [Danio rerio] ||PREDICTED: similar to sperm associated antigen 9 isoform 1 [Bos taurus] ||unnamed protein product [Tetraodon nigroviridis] ||	GAGTATCAGCGTCTACATGATTTATACACCAATCTTCTGCGTGTGTACCTTGAATATGTA	0	C800362.1	Smp_080700.3			Plus / Minus	Plus / Minus	Sense	CAZ35412.1	jnk/sapk-associated protein, putative [Schistosoma mansoni]	1e-38	NP_003962	>gi|27436920|ref|NP_003962.3| sperm associated antigen 9 isoform 3 [Homo sapiens]	Q2_P19658,Q2_P21871,Q2_P01552,Q2_P05307,Q2_P17324,Q2_P37717,Q2_P00116
39835	469	55	Q2_P18204	NO	C800363.1	SJCHGC01283 protein [Schistosoma japonicum] ||similar to myelin gene expression factor in Mus musculus [Schistosoma japonicum] ||	TCGCCCGCCGCATTTCTCATTATCTGTTTGTTAGTGTTTGTCATTTTCACTTTCATGCTG	0	C800363.1	Smp_041480.2			Plus / Plus	Plus / Plus	Sense	CAZ31732.1	rna recognition motif (rrm) domain containing protein, putative [Schistosoma mansoni]	2.2e-37	NP_057216	>gi|33620747|ref|NP_057216.2| myelin expression factor 2 [Homo sapiens]
9610	114	5	Q2_P00117	NO	C800365.1	SJCHGC01349 protein [Schistosoma japonicum] ||hypothetical protein [Schistosoma japonicum] ||CG2918-PA [Drosophila melanogaster] emb|CAA15711.1| EG:25E8.1 [Drosophila melanogaster] ref|NP_569995.1| CG2918-PA [Drosophila melanogaster] gb|AAM11058.1| GH11566p [Drosophila melanogaster] ||GA15518-PA [Drosophila pseudoobscura] ||	GCAGTCCCACTTCATCTTAGTCTGTTTTTATTAAAGTTTCTCTTTGCTTACTCTGTATTC	0	C800365.1	Smp_088950			Plus / Minus	Plus / Minus	Sense	CAZ36165.1	hypoxia upregulated 1 (hyou1)-related [Schistosoma mansoni]	2e-111	NP_006380	>gi|5453832|ref|NP_006380.1| hypoxia up-regulated 1 precursor [Homo sapiens]
19730	233	10	Q2_P00119	NO	C800367.1	MGC53016 protein [Xenopus laevis] ||topoisomerase (DNA) III beta [Homo sapiens] emb|CAG30482.1| TOP3B [Homo sapiens] gb|AAD29670.1| DNA topoisomerase III beta [Homo sapiens] gb|AAD15791.1| DNA topoisomerase III beta [Homo sapiens] gb|AAD01614.1| DNA topoisomerase III beta [Homo sapiens] sp|O95985|TOP3B_HUMAN DNA topoisomerase III beta-1 ||Topoisomerase (DNA) III beta [Homo sapiens] ||topoisomeras…	CTTGGATTTTGCGTAAAACGACACGATCAAATCCAGTCATTTAAACCAGAAACATTTTGG	0	C800367.1	Smp_169790			Plus / Minus	Plus / Minus	Sense	CAY17440.1	prokaryotic DNA topoisomerase, putative [Schistosoma mansoni]	0.0	NP_003926	>gi|4507635|ref|NP_003926.1| topoisomerase (DNA) III beta [Homo sapiens]	Q2_P01113,Q2_P15183,Q2_P31018,Q2_P00119,Q2_P35103
2065	25	25	Q2_P00121	NO	C800369.1	SJCHGC06326 protein [Schistosoma japonicum] ||PREDICTED: similar to maleless protein [Apis mellifera] ||nuclear DNA helicase II [Bos taurus] sp|Q28141|DHX9_BOVIN ATP-dependent RNA helicase A (Nuclear DNA helicase II) (NDH II) (DEAH-box protein 9) emb|CAA58036.1| nuclear DNA helicase II [Bos taurus] ||PREDICTED: hypothetical protein XP_514044 [Pan troglodytes] ||DEAH (Asp-Glu-Ala-His) box polypept…	GGGATGTCCGTTACTAATTTTCAGTCGTATAACTTTCACAAAGTGGTTCTAATTGTATCT	0	C800369.1	Smp_035030			Plus / Minus	Plus / Minus	Sense	CAZ39195.1	ATP-dependent RNA Helicase, putative [Schistosoma mansoni]	0.0	NP_001348	>gi|100913206|ref|NP_001348.2| DEAH (Asp-Glu-Ala-His) box polypeptide 9 [Homo sapiens]	Q2_P20146,Q2_P00121,Q2_P36497,Q2_P16261,Q2_P02612,Q2_P26002,Q2_P36950,Q2_P16647,Q2_P06433
36716	432	81	Q2_P18208	NO	C800370.1	SJCHGC04302 protein [Schistosoma japonicum] ||	TAGCTAATCGGGTTCGTGAAAATGGATCTTGTGACATAAATTGTAGTGCAGAAAAAGCTA	0	C800370.1	Smp_159120			Plus / Plus	Plus / Plus	Sense	CAZ34294.1	family C48 unassigned peptidase (C48 family) [Schistosoma mansoni]	1.5e-40	NP_001070671	>gi|116174736|ref|NP_001070671.1| sentrin/SUMO-specific protease 7 isoform 2 [Homo sapiens]	Q2_P35329,Q2_P15397,Q2_P01550,Q2_P18208,Q2_P30774,Q2_P25784,Q2_P20408
7099	84	44	Q2_P18209	NO	C800371.1	Y-box binding protein homolog [Schistosoma mansoni] gb|AAC47760.1| Y-box binding protein [Schistosoma mansoni] ||SJCHGC00971 protein [Schistosoma japonicum] ||Y-box DNA-binding protein [Schistosoma japonicum] gb|AAK53394.1| Y-box binding protein [Schistosoma japonicum] ||unknown [Schistosoma japonicum] ||SJCHGC05173 protein [Schistosoma japonicum] ||	ACCTGGCGGATTCTCCAGCAATCAAGATTTCGTGCCTTACTACGGTCCTCGAGGTCGAGG	0	C800371.1	Smp_097800.2			Plus / Plus	Plus / Plus	Sense	CAZ36910.1	Y box binding protein, putative [Schistosoma mansoni]	2.4e-23	NP_057066	>gi|156415990|ref|NP_057066.2| Y box binding protein 2 [Homo sapiens]	Q2_P12445,Q2_P18209,Q2_P31638
37651	443	81	Q2_P18210	NO	C800372.1	SJCHGC07434 protein [Schistosoma japonicum] ||	CGAATTGACTAAACTTGTATGGGAATCAAAACATGACGATAAATATCTTGATCTAGCCAC	0	C800372.1	Smp_033770			Plus / Plus	Plus / Plus	Sense	CAZ31058.1	hypothetical protein [Schistosoma mansoni]				Q2_P39653,Q2_P38511,Q2_P19556,Q2_P18210,Q2_P39357
3099	37	39	Q2_P18211	NO	C800373.1	SJCHGC06674 protein [Schistosoma japonicum] ||PREDICTED: similar to thimet oligopeptidase [Gallus gallus] ||thimet oligopeptidase [Xenopus laevis] ||LOC397806 protein [Xenopus laevis] ||Chain P Crystal Structure Of Human Thimet Oligopeptidase ||	GTTGGGACTAAATTAAAGGAAGCTGAAGTAAAAGAGACTGCACGTTTATTGGAATTGAAA	0	C800373.1	Smp_029500			Plus / Plus	Plus / Plus	Sense	CAZ30634.1	thimet oligopeptidase (M03 family) [Schistosoma mansoni]	0.0	NP_003240	>gi|4507491|ref|NP_003240.1| thimet oligopeptidase 1 [Homo sapiens]	Q2_P18211,Q2_P03208
24834	293	14	Q2_P18212	NO	C800374.1	similar to NM_078963 GTP-binding protein rab3A in Drosophila melanogaster [Schistosoma japonicum] ||GA20450-PA [Drosophila pseudoobscura] ||Rab3 [Loligo pealei] ||CG7576-PA [Drosophila melanogaster] ref|NP_523687.1| CG7576-PA [Drosophila melanogaster] gb|AAL25488.1| LP05860p [Drosophila melanogaster] dbj|BAD07037.1| Rab3 [Drosophila melanogaster] sp|P25228|RAB3_DROME Ras-related protein Rab-3 gb|…	GATAAAATGTCTGATAACATAGATAGTAACCCAGGTGTGGTTGGTGGGACATCGAAAGGT	0	C800374.1	Smp_154580			Plus / Plus	Plus / Plus	Sense	CAZ33580.1	rab 3 and, putative [Schistosoma mansoni]	2.9e-91	NP_612462	>gi|19923985|ref|NP_612462.1| RAB3C, member RAS oncogene family [Homo sapiens]	Q2_P18212
13610	161	10	Q2_P18213	NO	C800375.1	SJCHGC09226 protein [Schistosoma japonicum] ||PREDICTED: similar to D19Bwg1357e protein [Strongylocentrotus purpuratus] ||hypothetical protein LOC427350 [Gallus gallus] emb|CAG31153.1| hypothetical protein [Gallus gallus] ||PREDICTED: similar to KIAA0020 protein [Pan troglodytes] ||PREDICTED: similar to KIAA0020 isoform 1 [Bos taurus] ||	GCATCAGAAGTTATAGATACGTTATATAATGATTATGCCACTGCATCACAACGTAGTGAA	0	C800375.1	Smp_098450.1			Plus / Plus	Plus / Plus	Sense	CAZ36943.1	expressed protein [Schistosoma mansoni]	1.3e-51	NP_055693	>gi|109948283|ref|NP_055693.4| KIAA0020 protein [Homo sapiens]	Q2_P28445,Q2_P19197,Q2_P00767,Q2_P18213
43447	512	12	Q2_P00122	NO	C800376.1	SJCHGC06109 protein [Schistosoma japonicum] ||	AGGGGGTTTTGAAGGGCCCGTTTTCCCCGGGATAAAGGGAAAGTTCCCCCCTCCTTTTTT	0	C800376.1	Smp_089220			Plus / Minus	Plus / Minus	Sense	CAZ36198.1	expressed protein [Schistosoma mansoni]	3.7e-27	NP_057117	>gi|116875831|ref|NP_057117.2| regulator of microtubule dynamics 1 [Homo sapiens]
18086	213	66	Q2_P18214	NO	C800377.1	SJCHGC07929 protein [Schistosoma japonicum] ||SJCHGC00313 protein [Schistosoma japonicum] ||unknown [Schistosoma japonicum] ||	GGAGGCAAAGAATTCCAAAGAGGATATCAGGCGAAATTATATTCACATATAATCCAACAT	0	C800377.1	Smp_071520			Plus / Plus	Plus / Plus	Sense	CAZ34577.1	expressed protein [Schistosoma mansoni]				Q2_P18214,Q2_P19474
14697	173	77	Q2_P18215	NO	C800378.1	SJCHGC04711 protein [Schistosoma japonicum] ||	TTCACCGAAGAAGTACCTCTAAAATCTGTTGTGGAGTCCGAACAACGTACAATATGGCAG	0	C800378.1	Smp_030780			Plus / Plus	Plus / Plus	Sense	CAZ30756.1	ubiquitination factor E4a, putative [Schistosoma mansoni]	6.4e-22	NP_004779	>gi|38327029|ref|NP_004779.2| ubiquitination factor E4A [Homo sapiens]	Q2_P18215,Q2_P04065
12000	142	15	Q2_P18217	NO	C800380.1	membrane-bound transcription factor protease site 1 [Danio rerio] gb|AAP84652.1| site-1 protease [Danio rerio] ||PREDICTED: similar to Membrane-bound transcription factor site-1 protease precursor (Site-1 protease) (Subtilisin/kexin-isozyme-1) (SKI-1) isoform 5 [Canis familiaris] ||PREDICTED: similar to Membrane-bound transcription factor site-1 protease precursor (Site-1 protease) (Subtilisin/ke…	AACGAATTCTCTTTGATCAGTTCCATAGTATTCATTATCCATCTGGTTTTATTCCTCGAG	0	C800380.1	Smp_154140			Plus / Plus	Plus / Plus	Sense	CAZ33477.1	site-1 peptidase (S08 family) [Schistosoma mansoni]	0.0	NP_003782	>gi|4506775|ref|NP_003782.1| membrane-bound transcription factor site-1 protease preproprotein [Homo sapiens]	Q2_P15346,Q2_P18217,Q2_P39204,Q2_P35270
37272	439	42	Q2_P18218	NO	C800381.1	Zgc:101741 [Danio rerio] ref|NP_001007408.1| hypothetical protein LOC492766 [Danio rerio] ||PREDICTED: similar to SV2 related protein isoform 4 [Danio rerio] ref|XP_709393.1| PREDICTED: similar to SV2 related protein isoform 3 [Danio rerio] ref|XP_690158.1| PREDICTED: similar to SV2 related protein isoform 1 [Danio rerio] ||PREDICTED: similar to SV2 related protein isoform 2 [Danio rerio] ||SV2 r…	CAATAGTTGAAGAGATAAAACGAAAAGACAACAATAAACCAGCTGTTTTACCGGTTGAAC	0	C800381.1	Smp_132080			Plus / Plus	Plus / Plus	Sense	CAZ29478.1	sugar transporter, putative [Schistosoma mansoni]	4.4e-24	NP_061181	>gi|24308167|ref|NP_061181.1| SV2 related protein [Homo sapiens]	Q2_P35186,Q2_P18218,Q2_P15262
13614	161	14	Q2_P18219	NO	C800382.1	none	CTGTGTACTGACAGATAAAAATGGAAATACGGCACTACATTGTGCAGTAATGGATAAACT	0	C800382.1	Smp_141270			Plus / Plus	Plus / Plus	Sense	CAZ39245.1	subfamily C14A unassigned peptidase (C14 family) [Schistosoma mansoni]	2.3e-36	NP_001219	>gi|15718704|ref|NP_001219.2| caspase 8 isoform A precursor [Homo sapiens]	Q2_P35709,Q2_P18219,Q2_P00123
4426	53	6	Q2_P18220	NO	C800383.1	SJCHGC04225 protein [Schistosoma japonicum] ||	CATTTTAAGCGACATCATTTCAACTCTTCATCTACGTATTCATTCATCACCTACTTGTTC	0	C800383.1	Smp_134860			Plus / Plus	Plus / Plus	Sense	CAZ30020.1	translational activator gcn1-related [Schistosoma mansoni]	0.0	NP_006827	>gi|54607053|ref|NP_006827.1| GCN1 general control of amino-acid synthesis 1-like 1 [Homo sapiens]	Q2_P36892,Q2_P16591,Q2_P08525,Q2_P11484,Q2_P31274,Q2_P18220,Q2_P11178,Q2_P09996,Q2_P28840,Q2_P06071,Q2_P22595,Q2_P30968
16440	194	35	Q2_P18221	NO	C800384.1	similar to GenBank Accession Number U30261 G protein beta subunit-like [Schistosoma japonicum] ||G protein beta subunit-like Method: conceptual translation supplied by author sp|Q26544|WS17_SCHMA WD-repeat protein SL1-17 ||SJCHGC06281 protein [Schistosoma japonicum] ||hypothetical protein [Gallus gallus] ||PREDICTED: similar to recombination protein REC14 [Gallus gallus] ||	GCGCTCGTTATAGTCCTCAAGGAAATAATATTATATCTGTAGGAGATGATAGATCTATCA	0	C800384.1	Smp_049520			Plus / Plus	Plus / Plus	Sense	CAZ32494.1	WD repeat protein SL1-17, putative [Schistosoma mansoni]	2.7e-82	NP_079510	>gi|13376840|ref|NP_079510.1| WD repeat domain 61 [Homo sapiens]	Q2_P18221,Q2_P35842
21989	259	59	Q2_P18222	NO	C800385.1	none	TATTCTAAACCTGATGGTGAATGGCGTTCTTCTGTTACAGCTGACATAGTAAGCCCACTT	0	C800385.1	Smp_160540			Plus / Plus	Plus / Plus	Sense	CAZ34498.1	hypothetical protein [Schistosoma mansoni]				Q2_P18222,Q2_P00124
30879	364	24	Q2_P18224	NO	C800387.1	similar to GenBank Accession Number AF151842 CGI-84 protein in Homo sapiens [Schistosoma japonicum] ||Hypothetical protein zgc:77025 [Danio rerio] ref|NP_998069.1| hypothetical protein LOC405840 [Danio rerio] sp|Q6NXD2|CHM2B_BRARE Charged multivesicular body protein 2b (Chromatin modifying protein 2b) (CHMP2b) ||PREDICTED: similar to chromatin modifying protein 2B [Danio rerio] ref|XP_698597.1| P…	CCTAAGATACATTCATAACTGTGTACGTTTTTGAAACGAACTTCAGATAACTCTTGCCTT	0	C800387.1	Smp_070030			Plus / Plus	Plus / Plus	Sense	CAZ34450.1	snf7-related [Schistosoma mansoni]
20265	239	35	Q2_P18225	NO	C800388.1	similar to GenBank Accession Number AL360020 bA490F3 [Schistosoma japonicum] ||unnamed protein product [Tetraodon nigroviridis] ||unnamed protein product [Tetraodon nigroviridis] ||PREDICTED: similar to protein tyrosine phosphatase domain containing 1 protein isoform 2 isoform 2 [Bos taurus] ||unnamed protein product [Mus musculus] ||	CATCTCCGCTGAAGAAGCGATACAATATGTTAGATTTCGAAGGTTAGATGTAATAAACTA	0	C800388.1	Smp_181440.2			Plus / Plus	Plus / Plus	Sense	CAZ37616.1	expressed protein [Schistosoma mansoni]				Q2_P20905,Q2_P18225,Q2_P03560,Q2_P22878
15073	178	28	Q2_P18226	NO	C800389.1	SJCHGC09158 protein [Schistosoma japonicum] ||Hypothetical protein CBG20540 [Caenorhabditis briggsae] ||hypothetical protein [Gallus gallus] ref|NP_001006437.1| nuclear NF-kappaB activating protein [Gallus gallus] ||	GCTACCTACTGCTGAACATTCCAGCCTAATTCCATTAGATTATGGTCGAGCATTACTACC	0	C800389.1	Smp_029700			Plus / Plus	Plus / Plus	Sense	CAZ30648.1	Splicing factor, arginine/serine-rich 12 (Serine-arginine-rich-splicing regulatory protein 86) (SRrp86) (Splicing regulatory protein 508) (SRrp508), putative [Schistosoma mansoni]				Q2_P18226
38852	458	7	Q2_P00126	NO	C800390.1	SJCHGC00633 protein [Schistosoma japonicum] ||similar to GenBank Accession Number AF220548 testis enhanced gene transcript-like protein in Paralichthys olivaceus [Schistosoma japonicum] gb|AAQ16113.1| testis-enhanced transcript protein-like protein [Schistosoma japonicum] ||SJCHGC00634 protein [Schistosoma japonicum] ||PREDICTED: similar to testis enhanced gene transcript [Bos taurus] ||PREDICTED…	GACGTAATCGTGATGAAGATTAAAGAAAAAAGATGGTCTTCATTTCTTGACCGTTCAACT	0	C800390.1	Smp_044000			Plus / Minus	Plus / Minus	Sense	CAZ31960.1	bax inhibitor, putative [Schistosoma mansoni]	6.4e-49	NP_001092046	>gi|148746181|ref|NP_001092046.1| testis enhanced gene transcript (BAX inhibitor 1) isoform 2 [Homo sapiens]	Q2_P15394,Q2_P35326,Q2_P00126,Q2_P17127,Q2_P35810
40488	477	28	Q2_P00128	NO	C800392.1	MGC81713 protein [Xenopus laevis] ||Tuftelin interacting protein 11 [Homo sapiens] ||unnamed protein product [Macaca fascicularis] ||tuftelin interacting protein 11 [Homo sapiens] ref|NP_036275.1| tuftelin interacting protein 11 [Homo sapiens] emb|CAI17878.1| OTTHUMP00000028715 [Homo sapiens] emb|CAI17979.1| OTTHUMP00000028715 [Homo sapiens] emb|CAB45740.1| hypothetical protein [Homo sapiens] gb|…	TCGATTTATTGGGACACTGGAGAGATTTCTTCCAAAATTCTTGTGCATTTGATGTTATAC	0	C800392.1	Smp_139510			Plus / Minus	Plus / Minus	Sense	CAZ30879.1	tuftelin interacting protein, putative [Schistosoma mansoni]	2e-114	NP_036275	>gi|8393259|ref|NP_036275.1| tuftelin interacting protein 11 [Homo sapiens]	Q2_P34650,Q2_P19954,Q2_P09387,Q2_P00128,Q2_P29381,Q2_P06808,Q2_P06557,Q2_P09637
23839	281	39	Q2_P18228	NO	C800393.1	SJCHGC05680 protein [Schistosoma japonicum] ||PREDICTED: similar to lysocardiolipin acyltransferase isoform 1 partial [Strongylocentrotus purpuratus] ||lysocardiolipin acyltransferase [Danio rerio] gb|AAH66444.1| Lysocardiolipin acyltransferase [Danio rerio] ||unnamed protein product [Tetraodon nigroviridis] ||ACyLtransferase-like family member (acl-8) [Caenorhabditis elegans] gb|AAB66008.1| Acyl…	GTTATACACTTCATCCTAGAAGTACTGGATTCTTGCATTTAGTAAAACTGATCGGCTTAG	0	C800393.1	Smp_095580			Plus / Plus	Plus / Plus	Sense	CAZ36688.1	1-acylglycerol-3-phosphate acyltransferase, putative [Schistosoma mansoni]	1e-47	NP_872357	>gi|42558246|ref|NP_872357.2| lysocardiolipin acyltransferase 1 isoform 1 [Homo sapiens]	Q2_P18228,Q2_P27033
34219	403	49	Q2_P18229	NO	C800394.1	none	TAATGCTCAGTTAAGACACAATCAGTCAATTGTTCATGAGAAACCATTCATTGCGAGCAT	0	C800394.1	Smp_151130			Plus / Plus	Plus / Plus	Sense	CAZ32937.1	expressed protein [Schistosoma mansoni]				Q2_P18229
28162	332	27	Q2_P00130	NO	C800395.1	SJCHGC03741 protein [Schistosoma japonicum] ||	GCCCACTTCAATCAAGCATAGAGATAAAGAAAACTTTACAAGCTTCTCTTCGAAAGTATA	0	C800395.1	Smp_174850			Plus / Minus	Plus / Minus	Sense	CAZ36733.1	expressed protein [Schistosoma mansoni]				Q2_P19172,Q2_P10676,Q2_P30453,Q2_P00130,Q2_P28003,Q2_P31572,Q2_P08313
8921	105	81	Q2_P18230	NO	C800396.1	SJCHGC08044 protein [Schistosoma japonicum] ||GA21271-PA [Drosophila pseudoobscura] ||CG8709-PA [Drosophila melanogaster] ref|NP_610359.2| CG8709-PA [Drosophila melanogaster] gb|AAL90247.1| GH19076p [Drosophila melanogaster] ||PREDICTED: similar to CG8709-PA [Apis mellifera] ||PREDICTED: similar to lipin 1 (predicted) partial [Strongylocentrotus purpuratus] ||	CCCTGACAACAAAACTTCACAGTTAAACCTGAATCCAAGTAATCAATTCAATCATTCACA	0	C800396.1	Smp_149160			Plus / Plus	Plus / Plus	Sense	CAZ32589.1	lipin, putative [Schistosoma mansoni]				Q2_P02256,Q2_P18230,Q2_P27445,Q2_P21301
34261	404	6	Q2_P18231	NO	C800398.1	Calpain (Calcium-activated neutral proteinase) (CANP) gb|AAA29857.1| Calpain ||calcium-activated neutral proteinase ||SJCHGC06439 protein [Schistosoma japonicum] ||calpain [Schistosoma japonicum] ||calpain [Schistosoma japonicum] ||	CTTGCTGCTTTTTGTACAAAATCCTATTCTCGTTTTGATGTTGATCAAGGTGCTCTTGGT	0	C800398.1	Smp_157500			Plus / Plus	Plus / Plus	Sense	CAZ34035.1	calpain (C02 family) [Schistosoma mansoni]	5.9e-72	NP_775110	>gi|27765074|ref|NP_775110.1| calpain 3 isoform c [Homo sapiens]	Q2_P17942,Q2_P34944,Q2_P15025,Q2_P35026,Q2_P15106,Q2_P19534,Q2_P00512,Q2_P19175,Q2_P35371,Q2_P37001,Q2_P18231,Q2_P18868
2197	26	72	Q2_P18232	NO	C800399.1	SJCHGC05593 protein [Schistosoma japonicum] ||	AATTTCTACTCGAGTTCTATTGATCGTTGTATTGCAAGCGGGCGAGCATTTTATAACGGT	0	C800399.1	Smp_179560			Plus / Plus	Plus / Plus	Sense	CAZ37344.1	multiple inositol polyphosphate phosphatase-related [Schistosoma mansoni]	3.8e-35	NP_004888	>gi|19923761|ref|NP_004888.2| multiple inositol polyphosphate histidine phosphatase 1 [Homo sapiens]	Q2_P18232,Q2_P05298
41757	492	22	Q2_P18233	NO	C800400.1	PREDICTED: similar to PAP associated domain containing 5 (Topoisomerase-related function protein 4-2) (TRF4-2) [Danio rerio] ||PREDICTED: similar to 5730445M16Rik protein [Rattus norvegicus] ||PREDICTED: similar to PAP associated domain containing 5 (Topoisomerase-related function protein 4-2) (TRF4-2) [Mus musculus] ||PAP associated domain containing 5 (Topoisomerase-related function protein 4-2…	CGAGTTCTTCGAGCTTTATGGTCGTCATTTCAATTACAGAAATACAGCTATTCGCATCAC	0	C800400.1	Smp_145600			Plus / Plus	Plus / Plus	Sense	CAZ31921.1	expressed protein [Schistosoma mansoni]	2.4e-96	NP_001035375	>gi|94536832|ref|NP_001035375.1| PAP associated domain containing 5 isoform b [Homo sapiens]	Q2_P21088,Q2_P18233,Q2_P19543,Q2_P00974
29156	344	1	Q2_P18234	NO	C800401.1	fimbrin ||SJCHGC01985 protein [Schistosoma japonicum] ||CG8649-PD isoform D [Drosophila melanogaster] ref|NP_728074.1| CG8649-PD isoform D [Drosophila melanogaster] ||CG8649-PC isoform C [Drosophila melanogaster] ref|NP_728073.1| CG8649-PC isoform C [Drosophila melanogaster] ||CG8649-PA isoform A [Drosophila melanogaster] ref|NP_523385.1| CG8649-PA isoform A [Drosophila melanogaster] gb|AAL39487.…	CAAAAAAGGGATCGTAAATTAGTTTTGGGCGTTTGTTTCACATTGATGCAGGCATATATA	0	C800401.1	Smp_037230			Plus / Plus	Plus / Plus	Sense	CAZ31310.1	fimbrin, putative [Schistosoma mansoni]	3.5e-81	NP_002289	>gi|167614506|ref|NP_002289.2| L-plastin [Homo sapiens]	Q2_P18234,Q2_P35799
14377	170	12	Q2_P00132	NO	C800402.1	PREDICTED: similar to sortilin 1 preproprotein [Canis familiaris] ||PREDICTED: similar to Sortilin precursor (Glycoprotein 95) (Gp95) (Neurotensin receptor 3) (NT3) (100 kDa NT receptor) partial [Bos taurus] ||sortilin 1 preproprotein [Homo sapiens] emb|CAI13180.1| sortilin 1 [Homo sapiens] gb|AAH23542.1| Sortilin 1 preproprotein [Homo sapiens] ||PREDICTED: similar to sortilin 1 preproprotein neu…	ATTGCTTCTCCACCATTATCAATAGCCGCAGCACCAGGATTGATATTAGCTCATGGACAT	0	C800402.1	Smp_179360			Plus / Minus	Plus / Minus	Sense	CAZ37320.1	sortilin, putative [Schistosoma mansoni]	3.7e-32	NP_002950	>gi|17149834|ref|NP_002950.3| sortilin 1 preproprotein [Homo sapiens]	Q2_P00132
40958	482	73	Q2_P18235	NO	C800403.1	SJCHGC09603 protein [Schistosoma japonicum] ||CG6556-PA [Drosophila melanogaster] ref|NP_725671.1| CG6556-PA [Drosophila melanogaster] gb|AAX33358.1| SD09985p [Drosophila melanogaster] gb|AAC80557.1| connector enhancer of KSR protein CNK [Drosophila melanogaster] ||	GACGTACAGCTTCTGGTGACCCAAAACTGATGAATAGTATATCTAATGGCAACGGGGAAG	0	C800403.1	Smp_128400.2			Plus / Plus	Plus / Plus	Sense	CAZ28857.1	expressed protein [Schistosoma mansoni]				Q2_P18235,Q2_P11755
10957	129	77	Q2_P18236	NO	C800404.1	CLIP-170-related protein [Homo sapiens] ||PREDICTED: similar to CLIP-170-related protein [Canis familiaris] ||hypothetical protein [Pongo pygmaeus] ||CLIP-170-related protein [Homo sapiens] ref|NP_056341.1| CLIP-170-related protein [Homo sapiens] ||PREDICTED: similar to CLIP-170-related protein isoform 1 [Bos taurus] ||	GGTGCTAATCTTGAAGCTCGTTGTAAATGGACTGATATGACACCGTTACATTATGCAGCT	0	C800404.1	Smp_133390			Plus / Plus	Plus / Plus	Sense	CAZ29748.1	restin-like [Schistosoma mansoni]	1.9e-29	NP_078968	>gi|31982881|ref|NP_078968.3| CAP-GLY domain containing linker protein family, member 4 [Homo sapiens]	Q2_P27666,Q2_P07996,Q2_P10427,Q2_P30202,Q2_P09417,Q2_P18236,Q2_P11507,Q2_P31301,Q2_P08646,Q2_P28353,Q2_P25202,Q2_P29158
9929	117	69	Q2_P00133	NO	C800405.1	none	CTCTTAACCACAATCCATCTTTGCTTACCTACTTACAAGTAGTTTGGATAGTTTCAGTAA	0	C800405.1	Smp_133450			Plus / Minus	Plus / Minus	Sense	CAZ29755.1	jnk stimulatory phosphatase-related [Schistosoma mansoni]				Q2_P23377,Q2_P00133,Q2_P39269,Q2_P04007
19088	225	48	Q2_P18237	NO	C800406.1	SJCHGC06789 protein [Schistosoma japonicum] ||similar to GenBank Accession Number AE003804 CG9646 gene product in Drosophila melanogaster [Schistosoma japonicum] ||ENSANGP00000008858 [Anopheles gambiae str. PEST] ref|XP_320746.2| ENSANGP00000008858 [Anopheles gambiae str. PEST] ||SD21944p [Drosophila melanogaster] ||CG9646-PA [Drosophila melanogaster] ref|NP_611183.1| CG9646-PA [Drosophila melano…	CTGAGTGTTGTACTATGAAAGATGTTGTTATGACTGTTGTGAAGTTGATTTGCAAGAGTT	0	C800406.1	Smp_070940			Plus / Plus	Plus / Plus	Sense	CAZ34524.1	expressed protein [Schistosoma mansoni]	1.3e-32	NP_056079	>gi|57863293|ref|NP_056079.1| hypothetical protein LOC23313 isoform a [Homo sapiens]	Q2_P21733,Q2_P03518,Q2_P18237,Q2_P02648,Q2_P22825
6260	74	55	Q2_P18238	NO	C800407.1	none	TAGTTCTGGAGTACGAAATACTATTGTTGTGGAGACAAATGGTTGTATTAACGGTTCACG	0	C800407.1	Smp_135610			Plus / Plus	Plus / Plus	Sense	CAZ30150.1	expressed protein [Schistosoma mansoni]	8.7e-35	NP_005236	>gi|66346693|ref|NP_005236.2| FAT tumor suppressor 1 precursor [Homo sapiens]	Q2_P34004,Q2_P00134,Q2_P00871,Q2_P19354,Q2_P19697,Q2_P32834,Q2_P12992,Q2_P20189,Q2_P01362,Q2_P29944,Q2_P10178,Q2_P26503,Q2_P29009,Q2_P31174,Q2_P11389,Q2_P06888,Q2_P30304,Q2_P10521,Q2_P26407,Q2_P06796,Q2_P19892,Q2_P18238,Q2_P14129
18052	213	32	Q2_P18239	NO	C800408.1	SJCHGC04794 protein [Schistosoma japonicum] ||unnamed protein product [Tetraodon nigroviridis] ||unnamed protein product [Tetraodon nigroviridis] ||hypothetical protein LOC550432 [Danio rerio] gb|AAH93216.1| Hypothetical protein LOC550432 [Danio rerio] ||PREDICTED: similar to solute carrier family 27 (fatty acid transporter) member 4 [Bos taurus] ||	TTATCATTAGAGACGATATGGATAGCTGATGAGAAAAGTAGTTTACCAGAAACTGCCTAT	0	C800408.1	Smp_143830			Plus / Plus	Plus / Plus	Sense	CAZ31572.1	FFA transport protein, putative [Schistosoma mansoni]	9e-112	NP_940982	>gi|38524616|ref|NP_940982.1| solute carrier family 27, member 1 [Homo sapiens]	Q2_P35096,Q2_P18239,Q2_P15176
5585	66	60	Q2_P18240	NO	C800409.1	SJCHGC03988 protein [Schistosoma japonicum] ||	CGATCTTATTGATAATTTAGATCCTGTTCCACTTCAACATGCTTTAGAACCATTACCTAC	0	C800409.1	Smp_148140			Plus / Plus	Plus / Plus	Sense	CAZ32404.1	expressed protein [Schistosoma mansoni]				Q2_P18240
31777	374	72	Q2_P00135	NO	C800410.1	SJCHGC06486 protein [Schistosoma japonicum] ||ENSANGP00000006039 [Anopheles gambiae str. PEST] ref|XP_319149.2| ENSANGP00000006039 [Anopheles gambiae str. PEST] ||PREDICTED: similar to ENSANGP00000006039 [Apis mellifera] ||CG7289-PA [Drosophila melanogaster] gb|AAL28694.1| LD12115p [Drosophila melanogaster] ref|NP_608635.1| CG7289-PA [Drosophila melanogaster] ||GA20240-PA [Drosophila pseudoobscur…	ACACTGTCCCATGACTGGGTCATAAATAATCTAATTCTTTGTCCTCCAACTCGCTTTTTT	0	C800410.1	Smp_133980			Plus / Minus	Plus / Minus	Sense	CAZ29853.1	expressed protein [Schistosoma mansoni]	1.1e-27	NP_612355	>gi|25286703|ref|NP_612355.1| hypothetical protein LOC90231 [Homo sapiens]	Q2_P34730,Q2_P14810,Q2_P33398,Q2_P13542,Q2_P00135,Q2_P31645,Q2_P31255,Q2_P03957,Q2_P11841
23227	274	22	Q2_P18241	NO	C800411.1	developmentally regulated antigen 10.3 precursor [Schistosoma mansoni] ||developmentally regulated antigen - fluke (Schistosoma mansoni) sp|P13492|A103_SCHMA Antigen 10-3 precursor gb|AAA29855.1| antigen 10-3 ||precursor anti-coagulant SAP-1 [Schistosoma haematobium] ||SJCHGC02008 protein [Schistosoma japonicum] ||similar to GenBank Accession Number M22346 antigen 10-3 in Schistosoma mansoni [Sch…	GTTTGTGCAAATTATGGGATATTTACTAGAAGACGATGATACTTTAGAACTCAACTTGCC	0	C800411.1	Smp_163630			Plus / Plus	Plus / Plus	Sense	CAZ35114.1	expressed protein [Schistosoma mansoni]
23709	279	79	Q2_P18242	NO	C800412.1	similar to GenBank Accession Number Y14162 fizzy-related protein in Drosophila melanogaster [Schistosoma japonicum] ||GA15568-PA [Drosophila pseudoobscura] ||fizzy-related protein [Drosophila melanogaster] ||CG3000-PB isoform B [Drosophila melanogaster] gb|AAF45973.1| CG3000-PA isoform A [Drosophila melanogaster] ref|NP_726941.1| CG3000-PB isoform B [Drosophila melanogaster] ref|NP_524852.2| CG30…	TGGTTACTCACAGAATCAAATTCTTGTTTGGAGATATCCTAGTCTAACGCAATTAGTCAA	0	C800412.1	Smp_132020			Plus / Plus	Plus / Plus	Sense	CAZ29466.1	cell division cycle 20 (fizzy)-related [Schistosoma mansoni]	3.8e-62	NP_057347	>gi|33620742|ref|NP_057347.2| Fzr1 protein isoform 2 [Homo sapiens]	Q2_P40340,Q2_P38844,Q2_P18242,Q2_P40349,Q2_P38848
34059	401	59	Q2_P18243	NO	C800413.1	SJCHGC08409 protein [Schistosoma japonicum] ||hypothetical protein FG00340.1 [Gibberella zeae PH-1] ref|XP_380516.1| hypothetical protein FG00340.1 [Gibberella zeae PH-1] ||hypothetical protein MG03303.4 [Magnaporthe grisea 70-15] ||PREDICTED: similar to hypothetical protein FLJ23323 [Pan troglodytes] ||hypothetical protein DDB0204318 [Dictyostelium discoideum] gb|EAL68145.1| hypothetical protein…	TCTGATGATCCCAGTTTCTACTTGAAATGCCTCAGCTTTGTATATGATGCTTACGTTAAT	0	C800413.1	Smp_018280			Plus / Plus	Plus / Plus	Sense	CAZ29504.1	expressed protein [Schistosoma mansoni]	7.3e-22	NP_078930	>gi|40217805|ref|NP_078930.3| nucleolar protein 9 [Homo sapiens]	Q2_P21079,Q2_P18243,Q2_P38023
19750	233	30	Q2_P18244	NO	C800414.1	none	GGTACTGCCGCTTACACAAACAGTATAGCGTTAGAAAATTGGCATAATTGCTTAAAAAAT	0	C800414.1	Smp_155390			Plus / Plus	Plus / Plus	Sense	CAZ33690.1	expressed protein [Schistosoma mansoni]				Q2_P32305,Q2_P12508,Q2_P18244,Q2_P17322,Q2_P37715
27698	326	73	Q2_P18245	NO	C800415.1	none	CAATAATTCAGCAACTCCTAGCAAACCCATTGACCGGCATTCTTTGGTAAGCGAATATTC	0	C800415.1	Smp_130790.2			Plus / Plus	Plus / Plus	Sense	CAZ29279.1	eukaryotic release factor 3-related (erfs) (hbs1-like) [Schistosoma mansoni]	2e-113	NP_001138630	>gi|223555963|ref|NP_001138630.1| Hsp70 subfamily B suppressor 1-like protein isoform 2 [Homo sapiens]	Q2_P22278,Q2_P08772,Q2_P18245,Q2_P27571,Q2_P00137,Q2_P28483
26158	308	63	Q2_P18247	NO	C800417.1	PREDICTED: similar to PC2-like prohormone convertase [Apis mellifera] ||LPC2 [Lymnaea stagnalis] ||prohormone convertase ||GA19593-PA [Drosophila pseudoobscura] ||PC2-like prohormone convertase [Lucilia cuprina] emb|CAA70106.1| PC2-like prohormone convertase [Lucilia cuprina] ||	CCAAGAAATCAAACTATGCGAGCTCTAGTAGATGGTGTGAACAATGGTCGAAAAGGTAAA	0	C800417.1	Smp_077980			Plus / Plus	Plus / Plus	Sense	CAY17138.1	subfamily S8B non-peptidase homologue (S08 family) [Schistosoma mansoni]	0.0	NP_002585	>gi|20336244|ref|NP_002585.2| proprotein convertase subtilisin/kexin type 2 [Homo sapiens]	Q2_P22438,Q2_P18247,Q2_P11069,Q2_P30856
15171	179	41	Q2_P18248	NO	C800418.1	SJCHGC08372 protein [Schistosoma japonicum] ||PREDICTED: similar to GA20847-PA [Apis mellifera] ||GA20847-PA [Drosophila pseudoobscura] ||ENSANGP00000018709 [Anopheles gambiae str. PEST] ref|XP_312014.2| ENSANGP00000018709 [Anopheles gambiae str. PEST] ||CG8144-PC isoform C [Drosophila melanogaster] ref|NP_731356.1| CG8144-PC isoform C [Drosophila melanogaster] gb|AAG36790.1| PASILLA splice varia…	AGCACCAGGCTCAAATTCCAGCTTTTTGCCTCCTCATATTAATTCTCTTTCACCTGTAAG	0	C800418.1	Smp_049010			Plus / Plus	Plus / Plus	Sense	CAZ32444.1	rna-binding protein related [Schistosoma mansoni]	3.1e-51	NP_006480	>gi|56549651|ref|NP_006480.2| neuro-oncological ventral antigen 1 isoform 2 [Homo sapiens]	Q2_P18248,Q2_P00596
33414	394	9	Q2_P18249	NO	C800419.1	Hypothetical protein MGC76113 [Xenopus tropicalis] ref|NP_989258.1| hypothetical protein LOC394870 [Xenopus tropicalis] ||MGC83433 protein [Xenopus laevis] ||PREDICTED: similar to SMG-7 homolog isoform 2 isoform 6 [Danio rerio] ||PREDICTED: similar to 9430023P16Rik protein isoform 1 [Danio rerio] ||PREDICTED: similar to SMG-7 homolog isoform 1 isoform 5 [Danio rerio] ||	GCTTTATTCTATTACTATATACGTGCACTAGCATGTCTACATTCATTTCCTGCTTCTATG	0	C800419.1	Smp_051280			Plus / Plus	Plus / Plus	Sense	CAZ32665.1	smg-7 (suppressor with morphological effect on genitalia protein 7), putative [Schistosoma mansoni]				Q2_P14731,Q2_P12414,Q2_P32209,Q2_P34654,Q2_P18249,Q2_P10083,Q2_P29845,Q2_P25562,Q2_P05728,Q2_P31738
1568	19	38	Q2_P18250	NO	C800420.1	none	GTCAAATAGAAGCTCAAACAGAATATTTATCTGGTACACTGATATGTGAAGTGATTGGAG	0	C800420.1	Smp_181140			Plus / Plus	Plus / Plus	Sense	CAZ37566.1	expressed protein [Schistosoma mansoni]				Q2_P13688,Q2_P33561,Q2_P40266,Q2_P38792,Q2_P33818,Q2_P13946,Q2_P00139,Q2_P10438,Q2_P30212,Q2_P09303,Q2_P29056,Q2_P18250,Q2_P39398
20781	245	41	Q2_P18251	NO	C800421.1	none	CAACTGTTTTACACCGCTTTTATGTGAGAAATTGAGAAACTAAGCAAAGTTTTAGGGTGA	0	C800421.1	Smp_173050.1			Plus / Plus	Plus / Plus	Sense	CAZ36509.1	expressed protein [Schistosoma mansoni]	3.5e-30	NP_067045	>gi|24308263|ref|NP_067045.1| prune [Homo sapiens]	Q2_P19230,Q2_P00140,Q2_P18251,Q2_P00796
28922	341	22	Q2_P00142	NO	C800423.1	SJCHGC02189 protein [Schistosoma japonicum] ||	AGTGTCTACAGTACTAATAATCTCCTCTCACCGGTGTGCTTATACATTTCTACAATATTC	0	C800423.1	Smp_146630			Plus / Minus	Plus / Minus	Sense	CAZ32094.1	zinc finger protein, putative [Schistosoma mansoni]	1.1e-36	NP_116188	>gi|21361910|ref|NP_116188.2| zinc finger, DHHC domain containing 12 [Homo sapiens]
33201	391	51	Q2_P18253	NO	C800424.1	SJCHGC06764 protein [Schistosoma japonicum] ||PREDICTED: similar to ENSANGP00000014057 [Apis mellifera] ||PREDICTED: similar to Rho GDP-dissociation inhibitor 1 (Rho GDI 1) (Rho-GDI alpha) [Strongylocentrotus purpuratus] ||PREDICTED: similar to ENSANGP00000014057 [Apis mellifera] ||GA20609-PA [Drosophila pseudoobscura] ||	GTCAGTTACATTCGCTCTCTTCTTTACTATCAGTAAATGTGTTGCCTTATTTTCTTTTGC	0	C800424.1	Smp_045610			Plus / Plus	Plus / Plus	Sense	CAZ32117.1	rho GDP-dissociation inhibitor-related [Schistosoma mansoni]	1.1e-34	NP_001166	>gi|56676393|ref|NP_001166.3| Rho GDP dissociation inhibitor (GDI) beta [Homo sapiens]
20584	243	14	Q2_P00143	NO	C800425.1	none	CGCCTTTCGTATTTGTCTAGTCTTTTAAGATCAACTGTAAAGTCTTTCTTCTTTTCCCAT	0	C800425.1	Smp_076560.2			Plus / Minus	Plus / Minus	Sense	CAZ35063.1	cyclin, putative [Schistosoma mansoni]
28592	337	32	Q2_P18255	NO	C800426.1	SJCHGC07918 protein [Schistosoma japonicum] ||	GAAACAGTTAATCGTGGTTCTTCTGTTGTCTAACAATAATGTGGACGTCGATTGATTAAA	0	C800426.1	Smp_073360			Plus / Plus	Plus / Plus	Sense	CAZ34748.1	innexin, putative [Schistosoma mansoni]				Q2_P18255
26394	311	44	Q2_P18256	NO	C800427.1	glucose transport protein ||SJCHGC06565 protein [Schistosoma japonicum] ||glucose transport protein ||SJCHGC06671 protein [Schistosoma japonicum] ||TGTP1 [Taenia solium] ||	GAAGCAAAAGCACGTAAAGCCTTTCAACGACTTAACTGTATAGATGATATCAATGAAACA	0	C800427.1	Smp_105410			Plus / Plus	Plus / Plus	Sense	CAZ37550.1	glucose transport protein, putative [Schistosoma mansoni]	3e-80	NP_001033	>gi|4507011|ref|NP_001033.1| glucose transporter 4 [Homo sapiens]	Q2_P18256
10878	128	83	Q2_P18257	NO	C800428.1	SJCHGC03587 protein [Schistosoma japonicum] ||LOC495497 protein [Xenopus laevis] ||leukocyte receptor cluster (LRC) member 4 [Mus musculus] dbj|BAE32708.1| unnamed protein product [Mus musculus] dbj|BAC53808.1| mBB1 [Mus musculus] ||Leukocyte receptor cluster (LRC) member 4 [Mus musculus] dbj|BAE41580.1| unnamed protein product [Mus musculus] ||unnamed protein product [Mus musculus] ||	CAATATCCAACTTAAGTATATGGGGATGTGAATTCGCTCCTACAGTACGTGAATCGATGA	0	C800428.1	Smp_157930			Plus / Plus	Plus / Plus	Sense	CAZ34098.1	leukocyte receptor cluster (lrc) member 4 protein, putative [Schistosoma mansoni]	1.5e-77	NP_077274	>gi|225703079|ref|NP_077274.3| membrane bound O-acyltransferase domain containing 7 isoform 1 [Homo sapiens]	Q2_P07165,Q2_P18257
3207	38	62	Q2_P18258	NO	C800429.1	SJCHGC07177 protein [Schistosoma japonicum] ||MGC80720 protein [Xenopus laevis] ||MGC107851 protein [Xenopus tropicalis] gb|AAH89648.1| MGC107851 protein [Xenopus tropicalis] ||PREDICTED: similar to ENSANGP00000001164 [Apis mellifera] ||unnamed protein product [Tetraodon nigroviridis] ||	CTGTCAGTTCTAACAGGTGAACAAGTAGCACATATTATGATTCATGGGAAACCAAATGGA	0	C800429.1	Smp_035390			Plus / Plus	Plus / Plus	Sense	CAZ39235.1	protein tyrosine phosphatase n11 (shp2), putative [Schistosoma mansoni]	1e-160	NP_002825	>gi|33356177|ref|NP_002825.3| protein tyrosine phosphatase, non-receptor type 11 [Homo sapiens]	Q2_P33042,Q2_P39324,Q2_P18258,Q2_P13189
41907	494	2	Q2_P18259	NO	C800430.1	none	GTCCATCGCATTCAGAACAAGAATTGGATCAAGACATTTTGAAAAATGAACATGGCAAAA	0	C800430.1	Smp_139100.1			Plus / Plus	Plus / Plus	Sense	CAZ30814.1	expressed protein [Schistosoma mansoni]				Q2_P32368,Q2_P34466,Q2_P22124,Q2_P00144,Q2_P18259,Q2_P37156,Q2_P10443,Q2_P09413,Q2_P29155,Q2_P23559,Q2_P25819,Q2_P30217
28514	336	39	Q2_P18260	NO	C800431.1	SJCHGC04829 protein [Schistosoma japonicum] ||	CAGCTTCCAACTGGTTGTAAATGCTGAAGATGGCTTCACTGGTATTGGATCTCAGCTTTT	0	C800431.1	Smp_027450			Plus / Plus	Plus / Plus	Sense	CAZ30420.1	expressed protein [Schistosoma mansoni]				Q2_P18260
25173	297	13	Q2_P18261	NO	C800432.1	CG5884-PB isoform B [Drosophila melanogaster] gb|AAF48757.1| CG5884-PA isoform A [Drosophila melanogaster] ref|NP_728094.1| CG5884-PB isoform B [Drosophila melanogaster] ref|NP_573238.1| CG5884-PA isoform A [Drosophila melanogaster] gb|AAL28917.1| LD29223p [Drosophila melanogaster] gb|AAD15927.1| PAR-6 [Drosophila melanogaster] ||GA19201-PA [Drosophila pseudoobscura] ||PAR-6 beta [Homo sapiens] e…	TGACTTCCACTTGGTCTCATCGATATTGGATGTCGACATTATACCATGGACATTAAGACG	0	C800432.1	Smp_048550			Plus / Plus	Plus / Plus	Sense	CAZ32401.1	cell polarity protein; partition defective complex protein; synapse formation protein [Schistosoma mansoni]	6.6e-54	NP_115910	>gi|62955042|ref|NP_115910.1| PAR-6 beta [Homo sapiens]	Q2_P16478,Q2_P18261
40486	477	26	Q2_P18262	NO	C800433.1	SJCHGC05107 protein [Schistosoma japonicum] ||SJCHGC06906 protein [Schistosoma japonicum] ||unknown [Schistosoma japonicum] ||SJCHGC00516 protein [Schistosoma japonicum] ||unknown [Schistosoma japonicum] ||	AAGGCGAGTGGATTATCGAAAACAAGGTCTTGGAGGTTTGAGTAAAGAGCGCAGAAAAAA	0	C800433.1	Smp_059170.2			Plus / Plus	Plus / Plus	Sense	CAZ33439.1	troponin I, putative [Schistosoma mansoni]				Q2_P18262,Q2_P10554,Q2_P30165,Q2_P10386
18462	218	17	Q2_P18263	NO	C800434.1	none	ACAAGTATCGTCTCCTAGTTTCACGGAGAATAATATTGACACTAGTCTACAGAATACTCC	0	C800434.1	Smp_141600			Plus / Plus	Plus / Plus	Sense	CAZ31205.1	expressed protein [Schistosoma mansoni]	1.7e-60	NP_055869	>gi|55749644|ref|NP_055869.1| UHRF1 (ICBP90) binding protein 1-like isoform a [Homo sapiens]	Q2_P14988,Q2_P34911,Q2_P12900,Q2_P32723,Q2_P18263,Q2_P00145,Q2_P03097,Q2_P09726,Q2_P29466,Q2_P17511,Q2_P17323,Q2_P37716,Q2_P22339,Q2_P11196
40979	483	9	Q2_P18264	NO	C800435.1	HIRA [Gallus gallus] ||histone cell cycle regulation defective homolog A isoform 1 [Mus musculus] ||HIR (histone cell cycle regulation defective S. cerevisiae) homolog A [Homo sapiens] emb|CAG30389.1| HIRA [Homo sapiens] gb|AAH39835.1| HIR (histone cell cycle regulation defective S. cerevisiae) homolog A [Homo sapiens] ||HIRA [Homo sapiens] sp|P54198|HIRA_HUMAN HIRA protein (TUP1 like enhancer of…	TTTAGCTTCCACCAGTGTAGATAATTCTGTCATTGTTTGGTGTCGTCAAAAACTTCCTAA	0	C800435.1	Smp_090070			Plus / Plus	Plus / Plus	Sense	CAZ36264.1	WD-repeat protein, putative [Schistosoma mansoni]	4e-117	NP_003316	>gi|21536485|ref|NP_003316.3| HIR histone cell cycle regulation defective homolog A [Homo sapiens]	Q2_P18264
20529	242	44	Q2_P18265	NO	C800436.1	Hypothetical protein T22H6.6 [Caenorhabditis elegans] emb|CAA90676.2| Hypothetical protein T22H6.6 [Caenorhabditis elegans] ref|NP_510137.2| GEX Interacting protein family member (gei-3) [Caenorhabditis elegans] ||PREDICTED: similar to capicua homolog [Strongylocentrotus purpuratus] ||capicua homolog [Homo sapiens] gb|AAK73515.1| capicua protein [Homo sapiens] sp|Q96RK0|CIC_HUMAN Protein capicua …	GATTGGTGGTATCATTTAAATGCATCAGAAAAAGCACCTTATCAACAATTGGCTCGTGAA	0	C800436.1	Smp_142600			Plus / Plus	Plus / Plus	Sense	CAZ31371.1	capicua protein, putative [Schistosoma mansoni]	1.5e-24	NP_055940	>gi|112421108|ref|NP_055940.3| capicua homolog [Homo sapiens]	Q2_P34243,Q2_P14353,Q2_P32741,Q2_P02627,Q2_P26654,Q2_P07015,Q2_P21709,Q2_P18265
19777	233	57	Q2_P18267	NO	C800438.1	SJCHGC06668 protein [Schistosoma japonicum] ||V-ATPase G subunit [Clonorchis sinensis] ||ATPase H+ transporting lysosomal V1 subunit G isoform 1 [Homo sapiens] ref|XP_528400.1| PREDICTED: similar to ATPase H+ transporting lysosomal V1 subunit G isoform 1 ATPase H+ transporting lysosomal 13kD V1 subunit G isoform 1 ATPase H+ transporting lysosomal (vacuolar proton pump) subunit G1 ATPase H+ transp…	CCACAGCTACACAAAAATTATCGCAATGGAATAACGGGTTAACCAACAGTATTCTAAATT	0	C800438.1	Smp_054220			Plus / Plus	Plus / Plus	Sense	CAZ32947.1	vacuolar ATP synthase subunit G, putative [Schistosoma mansoni]				Q2_P18267,Q2_P22909,Q2_P03593
2441	29	61	Q2_P18268	NO	C800439.1	SJCHGC07024 protein [Schistosoma japonicum] ||Unknown (protein for MGC:132333) [Xenopus laevis] gb|AAH70619.1| MGC81379 protein [Xenopus laevis] ||ENSANGP00000026746 [Anopheles gambiae str. PEST] ref|XP_558852.1| ENSANGP00000026746 [Anopheles gambiae str. PEST] ||ENSANGP00000027279 [Anopheles gambiae str. PEST] ref|XP_558851.1| ENSANGP00000027279 [Anopheles gambiae str. PEST] ||pyrophosphatase [X…	CGTATGACTGTTATTTACCTTTTTTGGTTGTAACCCTAAATACTCGTCTGTATAGGTCTA	0	C800439.1	Smp_135950			Plus / Plus	Plus / Plus	Sense	CAZ30207.1	cell polarity protein; inorganic pyrophosphatase, putative; lethal giant larvae homolog 2 [Schistosoma mansoni]	4.8e-91	NP_004131	>gi|62912476|ref|NP_004131.3| lethal giant larvae homolog 1 [Homo sapiens]
1637	20	22	Q2_P00147	NO	C800440.1	SJCHGC05420 protein [Schistosoma japonicum] ||	TGCTGCAAAGTTGCCAAACAGTCAAATCCAACTTTCCTTATTCGTTTCCCTATATTTTTT	0	C800440.1	Smp_067930			Plus / Minus	Plus / Minus	Sense	CAZ34246.1	28 kDa heat-and acid-stable phosphoprotein (PDGF-associated protein) (PAP) (PDGFA-associated protein 1) (PAP1), putative [Schistosoma mansoni]
19663	232	28	Q2_P18269	NO	C800441.1	SJCHGC06637 protein [Schistosoma japonicum] ||SJCHGC01209 protein [Schistosoma japonicum] ||tetraspanin TE736 [Schistosoma japonicum] ||unknown [Schistosoma japonicum] ||unknown [Schistosoma japonicum] ||	CCGGATGTCTTGGTTTAGTTACTACATGTTTAGGATTTCTTGGAATATGGAGAAAAATCA	0	C800441.1	Smp_099770			Plus / Plus	Plus / Plus	Sense	CAZ37024.1	tetraspanin, putative [Schistosoma mansoni]				Q2_P18269
2621	31	71	Q2_P18270	NO	C800442.1	SJCHGC05618 protein [Schistosoma japonicum] ||hypothetical protein [Gallus gallus] ||5 -nucleotidase cytosolic III [Gallus gallus] gb|AAQ12342.1| pyrimidine 5 -nucleotidase [Gallus gallus] emb|CAD42712.1| 5 -nucleotidase [Gallus gallus] ||LOC494724 protein [Xenopus laevis] ||PREDICTED: similar to 5-nucleotidase cytosolic III isoform 3 [Canis familiaris] ||	CCCCATATATGTTAGAATGGTGGGAATTAGCTCATGAAGTAATTATTGAATGTGGAATAC	0	C800442.1	Smp_097180			Plus / Plus	Plus / Plus	Sense	CAZ36843.1	conserved hypothetical protein [Schistosoma mansoni]	4.4e-60	NP_001002009	>gi|70608080|ref|NP_001002009.1| 5'-nucleotidase, cytosolic III isoform 2 [Homo sapiens]	Q2_P18270
39889	470	24	Q2_P18271	NO	C800443.1	none	CTGGCATGATTCCCTCCCCCCTATTACTCTAATTGAATCAAAGCTTATTTGTTTATATTA	0	C800443.1	Smp_179660			Plus / Plus	Plus / Plus	Sense	CAZ37358.1	hypothetical protein [Schistosoma mansoni]
43089	507	79	Q2_P18272	NO	C800444.1	SJCHGC05241 protein [Schistosoma japonicum] ||SMDR2 ||PREDICTED: similar to multidrug resistance protein [Danio rerio] ||SJCHGC04107 protein [Schistosoma japonicum] ||PREDICTED: similar to ATP-binding cassette sub-family B (MDR/TAP) member 1A [Strongylocentrotus purpuratus] ||	ACGTTATAGCAATAATCTGAATATGGCTGCCGCTTGTGGTGTAAAACAGGCAGGTTGGCT	0	C800444.1	Smp_137080			Plus / Plus	Plus / Plus	Sense	CAZ30429.1	multidrug resistance protein 1, 2, 3 (p glycoprotein 1, 2, 3), putative [Schistosoma mansoni]	4.3e-84	NP_003733	>gi|21536378|ref|NP_003733.2| ATP-binding cassette, sub-family B (MDR/TAP), member 11 [Homo sapiens]	Q2_P13320,Q2_P33162,Q2_P26360,Q2_P18272,Q2_P08660,Q2_P35951
31551	372	16	Q2_P18273	NO	C800445.1	SJCHGC04909 protein [Schistosoma japonicum] ||unnamed protein product [Tetraodon nigroviridis] ||Suclg1-prov protein [Xenopus tropicalis] ref|NP_001025589.1| suclg1-prov protein [Xenopus tropicalis] ||unnamed protein product [Mus musculus] ||hypothetical protein [Gallus gallus] ref|NP_001012910.1| succinate-CoA ligase GDP-forming alpha subunit [Gallus gallus] ||	GTAACTTTCATCTCTTTTTAGTGGATATTAAAATAGCAGTAGTCTTTTGTGCCGCTAGCT	0	C800445.1	Smp_052060			Plus / Plus	Plus / Plus	Sense	CAZ32748.1	succinyl-CoA synthetase-related [Schistosoma mansoni]	2e-117	NP_003840	>gi|109452591|ref|NP_003840.2| succinate-CoA ligase, GDP-forming alpha subunit [Homo sapiens]
36172	426	47	Q2_P18274	NO	C800446.1	SJCHGC03712 protein [Schistosoma japonicum] ||SJCHGC07951 protein [Schistosoma japonicum] ||low density lipoprotein-receptor related protein [Schistosoma mansoni] ||	GATTTTGTGATGGAGCAAGGGACTGTGATGATGGTTCAGATGAAGATCCTAAAATGTGCA	0	C800446.1	Smp_020550			Plus / Plus	Plus / Plus	Sense	CAZ29738.1	low-density lipoprotein receptor (ldl) [Schistosoma mansoni]	1.3e-32	NP_005520	>gi|126012571|ref|NP_005520.4| heparan sulfate proteoglycan 2 [Homo sapiens]	Q2_P34190,Q2_P14303,Q2_P09622,Q2_P29367,Q2_P18274
4725	56	50	Q2_P18275	NO	C800447.1	glycogen phosphorylase [Crassostrea gigas] ||PREDICTED: similar to ENSANGP00000010081 [Apis mellifera] ||PREDICTED: similar to Glycogen phosphorylase muscle form (Myophosphorylase) isoform 6 [Canis familiaris] ||phosphorylase glycogen liver (Hers disease glycogen storage disease type VI) [Gallus gallus] gb|AAP33020.1| glycogen phosphorylase [Gallus gallus] ||LOC494832 protein [Xenopus laevis] ||	GTTGACTTGTGTGTGCGCTTGGTTTCTATAAACATGACCTTTCTAATTAGTTTATTACTC	0	C800447.1	Smp_143840			Plus / Plus	Plus / Plus	Sense	CAZ31575.1	glycogen phosphorylase, putative [Schistosoma mansoni]	0.0	NP_002854	>gi|71037379|ref|NP_002854.3| liver glycogen phosphorylase [Homo sapiens]
21108	249	28	Q2_P18276	NO	C800448.1	SJCHGC00836 protein [Schistosoma japonicum] ||similar to GenBank Accession Number AE003616 calcium binding atopy-related autoantigen 1 atopy related autoantigen in Mus musculus [Schistosoma japonicum] ||unknown [Schistosoma japonicum] ||CG4495-PA [Drosophila melanogaster] ref|NP_609100.1| CG4495-PA [Drosophila melanogaster] gb|AAK93419.1| LD46238p [Drosophila melanogaster] ||calcium binding atopy…	ATTAACTGTGCTTTCGACACCTCGTCGACAGTTTGAAATAGCTTTTCGTATGTTTGATAT	0	C800448.1	Smp_045960			Plus / Plus	Plus / Plus	Sense	CAZ32155.1	calcium binding atopy-related autoantigen [Schistosoma mansoni]	2e-106	NP_006068	>gi|116256483|ref|NP_006068.2| calcium binding atopy-related autoantigen 1 [Homo sapiens]
689	9	9	Q2_P18277	NO	C800449.1	SJCHGC04557 protein [Schistosoma japonicum] ||CG13384-PB isoform B [Drosophila melanogaster] ref|NP_723384.1| CG13384-PB isoform B [Drosophila melanogaster] ||CG13384-PC isoform C [Drosophila melanogaster] ref|NP_723383.1| CG13384-PC isoform C [Drosophila melanogaster] ||CG13384-PG isoform G [Drosophila melanogaster] gb|AAM50017.1| SD05512p [Drosophila melanogaster] ref|NP_995658.1| CG13384-PG is…	GTGTAGTCACCTATTTATCCGGTTTGGCTAATGTATGTACTGCAATTGGTATGATATTAA	0	C800449.1	Smp_029360			Plus / Plus	Plus / Plus	Sense	CAZ30620.1	amino acid transporter, putative [Schistosoma mansoni]	8.7e-47	NP_861439	>gi|222446640|ref|NP_861439.3| solute carrier family 36, member 3 isoform 2 [Homo sapiens]	Q2_P13261,Q2_P18277,Q2_P33116
26988	318	43	Q2_P18278	NO	C800450.1	none	AAACTTGGAAAGATTCTGGAGCAGCACGTTCTCATGCACATAAAGTTAATGATTCTGTTA	0	C800450.1	Smp_152130			Plus / Plus	Plus / Plus	Sense	CAZ33124.1	PI3kinase, putative [Schistosoma mansoni]				Q2_P01026,Q2_P01676,Q2_P20568,Q2_P10425,Q2_P18278,Q2_P30200,Q2_P00149
13339	157	79	Q2_P18279	NO	C800451.1	SJCHGC07060 protein [Schistosoma japonicum] ||SJCHGC07059 protein [Schistosoma japonicum] ||leucine-rich protein [Bos taurus] ref|NP_777164.1| PKD2 interactor golgi and endoplasmic reticulum associated 1 [Bos taurus] sp|Q8MJK1|CBY_BOVIN Chibby protein (PIGEA-14) (Cytosolic leucine-rich protein) ||cytosolic leucine-rich protein [Mus musculus] gb|AAH05733.1| PKD2 interactor golgi and endoplasmic re…	GCTCGCTGAAACTACAGCTGAAGTACATTTACAAGAGAATGAAATTGAAAATCTACGTAA	0	C800451.1	Smp_035010			Plus / Plus	Plus / Plus	Sense	CAZ39192.1	chibby protein pkd2 interactor, putative [Schistosoma mansoni]				Q2_P18279
26885	317	25	Q2_P18280	NO	C800452.1	TR4/TR2 [Schistosoma mansoni] ||	AAGTAGATCAGCTTCTTGTGAGATTACAGCCACGAGCATCGAGCTAAACAATCAAAACAC	0	C800452.1	Smp_105090			Plus / Plus	Plus / Plus	Sense	CAZ37524.1	Tr4/Tr2 (homologue) [Schistosoma mansoni]	2e-30	NP_003289	>gi|36950991|ref|NP_003289.2| nuclear receptor subfamily 2, group C, member 2 [Homo sapiens]	Q2_P19028,Q2_P22465,Q2_P19671,Q2_P18280,Q2_P04146,Q2_P06750,Q2_P40604,Q2_P08413,Q2_P04423,Q2_P31693
23890	282	5	Q2_P18281	NO	C800453.1	similar to GenBank Accession Number AF316828 zinc finger protein SmZF1 in Schistosoma mansoni [Schistosoma japonicum] ||zinc finger protein SmZF1 [Schistosoma mansoni] gb|AAG38587.1| zinc finger protein SmZF1 [Schistosoma mansoni] ||SJCHGC09426 protein [Schistosoma japonicum] ||PREDICTED: similar to zinc finger protein 658 [Danio rerio] ||PREDICTED: similar to zinc finger protein 251 [Danio rerio…	CATCGCTGAAGAGAAACCAGATTGTATAATCCTCTCCAATTTTCATATGATTTCATGTTC	0	C800453.1	Smp_147960			Plus / Plus	Plus / Plus	Sense	CAZ32365.1	conserved hypothetical protein [Schistosoma mansoni]
18063	213	43	Q2_P18282	NO	C800454.1	PREDICTED: similar to ribosomal protein L7 [Apis mellifera] ||ribosomal protein L7-like [Ixodes scapularis] ||L7 [Suberites domuncula] ||ribosomal protein L7 [Crassostrea gigas] ||hypothetical protein UM03578.1 [Ustilago maydis 521] gb|EAK84469.1| hypothetical protein UM03578.1 [Ustilago maydis 521] ||	GAGCATTAACTTTGTCTACAGAAATAAGTATGTGCTAGCTGAAGCTTACATAACAATGTC	0	C800454.1	Smp_136090			Plus / Plus	Plus / Plus	Sense	CAZ30233.1	60S ribosomal protein L7, putative [Schistosoma mansoni]	1.3e-35	NP_000962	>gi|15431301|ref|NP_000962.2| ribosomal protein L7 [Homo sapiens]
25685	303	15	Q2_P18283	NO	C800455.1	PREDICTED: similar to G protein pathway suppressor 1 isoform 2 Arabidopsis FUS6/COP11 homolog [Pan troglodytes] ||G protein pathway suppressor 1 isoform 2 variant [Homo sapiens] ||PREDICTED: similar to G protein pathway suppressor 1 isoform 1 [Bos taurus] ref|XP_874510.1| PREDICTED: similar to G protein pathway suppressor 1 isoform 2 [Bos taurus] ||PREDICTED: similar to G protein pathway suppress…	GGTGATAGTATTGGAGGTCATGTCCCTACATCAGGTGGTCAAAGCTATCGTGATGCCTTA	0	C800455.1	Smp_138920.2			Plus / Plus	Plus / Plus	Sense	CAZ30772.1	cop9 signalosome complex subunit, putative [Schistosoma mansoni]	5.1e-52	NP_997657	>gi|47078238|ref|NP_997657.1| G protein pathway suppressor 1 isoform 1 [Homo sapiens]	Q2_P18283,Q2_P16006,Q2_P36308,Q2_P12148,Q2_P24686,Q2_P11105,Q2_P06847,Q2_P26458,Q2_P30892
23750	280	35	Q2_P00150	NO	C800456.1	SJCHGC03914 protein [Schistosoma japonicum] ||	CGAATAGCTCCTCTTCAGCAACGTTACGTTATTTGTCAAGAAGTTAATCCTCATCCAAAG	0	C800456.1	Smp_153880			Plus / Minus	Plus / Minus	Sense	CAZ33425.1	phd finger protein, putative [Schistosoma mansoni]				Q2_P17892,Q2_P00150,Q2_P19962,Q2_P32249,Q2_P18631,Q2_P25708,Q2_P06058,Q2_P00281,Q2_P12456
24351	287	41	Q2_P18284	NO	C800457.1	SJCHGC05405 protein [Schistosoma japonicum] ||similar to synaptosomal-associated protein 29 vesicle-membrane fusion protein SNAP-29 soluble 29 kDa NSF attachment protein synaptosomal-associated protein 29kD [Gallus gallus] emb|CAG31293.1| hypothetical protein [Gallus gallus] ||GS32 protein [Mus musculus] dbj|BAE28177.1| unnamed protein product [Mus musculus] dbj|BAC30277.1| unnamed protein produc…	CCGGTCTTGTTTGAGTATTTCGTTCGAAGAGACCTTTATTTCTGTTAATGTTTGATTTGT	0	C800457.1	Smp_043940.2			Plus / Plus	Plus / Plus	Sense	CAZ31952.1	synaptosomal associated protein, putative [Schistosoma mansoni]	5.6e-21	NP_004773	>gi|4759154|ref|NP_004773.1| synaptosomal-associated protein 29 [Homo sapiens]
24577	290	12	Q2_P00151	NO	C800458.1	similar to GenBank Accession Number BC003643 RIKEN cDNA 3222401G21 gene in Homo sapiens [Schistosoma japonicum] ||PREDICTED: similar to ENSANGP00000024653 [Apis mellifera] ||PREDICTED: similar to dehydrodolichyl diphosphate synthase isoform b cis-isoprenyltransferase [Gallus gallus] ||Unknown (protein for MGC:130804) [Xenopus laevis] gb|AAH72115.1| LOC398626 protein [Xenopus laevis] ||MGC52912 pr…	CGTTATTACCAGCAAAAGTTCAAAGTTTGGCTGCACAATTAATGCTTGTTACTAGAAATC	0	C800458.1	Smp_048520.2			Plus / Minus	Plus / Minus	Sense	CAZ32396.1	dehydrodolichyl diphosphate synthase (dedol-pp synthase), putative [Schistosoma mansoni]	2.4e-53	NP_995583	>gi|45580738|ref|NP_995583.1| dehydrodolichyl diphosphate synthase isoform b [Homo sapiens]	Q2_P38816,Q2_P00151
31631	373	11	Q2_P18286	NO	C800460.1	SJCHGC05560 protein [Schistosoma japonicum] ||	GAACGAGCAGTACTATTTCGCCTTGGAAGACTGGTATCTGCAACTGCTAAAGGTCCAGGA	0	C800460.1	Smp_003440			Plus / Plus	Plus / Plus	Sense	CAZ28037.1	stomatin-related [Schistosoma mansoni]	1.7e-60	NP_004090	>gi|38016911|ref|NP_004090.4| stomatin isoform a [Homo sapiens]	Q2_P27581,Q2_P18286
36517	430	52	Q2_P18287	NO	C800461.1	SJCHGC03774 protein [Schistosoma japonicum] ||islet cell autoantigen 1 69kDa [Xenopus tropicalis] ||MGC83241 protein [Xenopus laevis] ||Ica1-prov protein [Xenopus laevis] ||PREDICTED: similar to islet cell autoantigen 1 isoform 1 islet cell autoantigen 1 (69kD) islet cell autoantigen p69 [Gallus gallus] ||	CCAGTCGATGCAATATGTTGAGTCATGTACTTGTCGGCTATCAGAATACTTTGTTGACTT	0	C800461.1	Smp_126770.1			Plus / Plus	Plus / Plus	Sense	CAZ28570.1	islet cell autoantigen, putative [Schistosoma mansoni]	1.7e-78	NP_612477	>gi|22095388|ref|NP_612477.3| islet cell autoantigen 1,69kDa-like isoform 1 [Homo sapiens]	Q2_P18287,Q2_P10079,Q2_P29841,Q2_P07599
40665	479	35	Q2_P18288	NO	C800462.1	SJCHGC04860 protein [Schistosoma japonicum] ||CG7736-PD isoform D [Drosophila melanogaster] ref|NP_995814.1| CG7736-PD isoform D [Drosophila melanogaster] gb|AAN71418.1| RE48509p [Drosophila melanogaster] ||syntaxin-like protein [Bombyx mori] ||syntaxin-like protein [Bombyx mori] ||syntaxin 6 [synthetic construct] gb|AAX42786.1| syntaxin 6 [synthetic construct] ||	CAGCACGTTTATTACATTTAAATACTGATCGTCGTCAATGGTGTGCTATTTTCTCTTTGT	0	C800462.1	Smp_104960			Plus / Plus	Plus / Plus	Sense	CAZ37510.1	syntaxin, putative [Schistosoma mansoni]	6.4e-32	NP_005810	>gi|5032131|ref|NP_005810.1| syntaxin 6 [Homo sapiens]	Q2_P18288,Q2_P29506,Q2_P09768
29539	348	44	Q2_P18289	NO	C800464.1	similar to NM_070957 Y50D4C [Schistosoma japonicum] ||SJCHGC03626 protein [Schistosoma japonicum] ||Y50D4C.3 [Caenorhabditis elegans] gb|AAK68508.1| Hypothetical protein Y50D4C.3 [Caenorhabditis elegans] ||PREDICTED: similar to tudor domain containing 3 (predicted) [Strongylocentrotus purpuratus] ||unnamed protein product [Tetraodon nigroviridis] ||	CCTTATTCAAACAGAAGGGAAATTTCTTAATCAATTAAGATCGGATCGAGAGCGTAATCA	0	C800464.1	Smp_001095			Plus / Plus	Plus / Plus	Sense	CAZ27815.1	hypothetical conserved protein, putative [Schistosoma mansoni]	3e-24	NP_001139542	>gi|225703106|ref|NP_001139542.1| tudor domain containing 3 isoform 1 [Homo sapiens]	Q2_P18289,Q2_P02057,Q2_P16754,Q2_P30932,Q2_P21037
34667	408	72	Q2_P18290	NO	C800465.1	SJCHGC08434 protein [Schistosoma japonicum] ||MGC81040 protein [Xenopus laevis] ||PREDICTED: similar to tumor susceptibility protein 101 [Gallus gallus] ||tumor susceptibility protein 101 [Chelonia mydas] ||tumor susceptibility gene 101 [Xenopus tropicalis] gb|AAH64236.1| Hypothetical protein MGC76193 [Xenopus tropicalis] ||	TCAGTTGCCCAATTTCGCTGGCCCCTTTACTCAAGCCGCAAATACAAATATATACTCTAT	0	C800465.1	Smp_193790			Plus / Plus	Plus / Plus	Sense	CAZ38990.1	tsg101-related [Schistosoma mansoni]	1.6e-35	NP_006283	>gi|5454140|ref|NP_006283.1| tumor susceptibility gene 101 [Homo sapiens]	Q2_P23244,Q2_P18290
2924	35	34	Q2_P18291	NO	C800466.1	SJCHGC07786 protein [Schistosoma japonicum] ||	TGTATAGTTGAGGTGTGCGCTACCTATGAGGATAGACATAAGAAGTATGTATCAGGGATT	0	C800466.1	Smp_122370.1			Plus / Plus	Plus / Plus	Sense	CAZ27755.1	zinc finger protein, putative [Schistosoma mansoni]	8.4e-40	NP_115784	>gi|14670392|ref|NP_115784.1| bromodomain adjacent to zinc finger domain, 1B [Homo sapiens]	Q2_P13938,Q2_P33809,Q2_P02178,Q2_P21207,Q2_P23296,Q2_P22760,Q2_P03458,Q2_P00339,Q2_P26573,Q2_P18291
2588	31	38	Q2_P18292	NO	C800467.1	SJCHGC06203 protein [Schistosoma japonicum] ||PREDICTED: similar to SYAP1 protein [Gallus gallus] ||SYAP1 protein [Rattus norvegicus] ref|NP_001004253.1| SYAP1 protein [Rattus norvegicus] ||unnamed protein product [Homo sapiens] ||SYAP1 protein variant [Homo sapiens] ||	CTGTTGTTATGGACAATACTCATCAACCAAGCATCAGTAATAATGGTGGTATTACAAATG	0	C800467.1	Smp_085530			Plus / Plus	Plus / Plus	Sense	CAZ35890.1	synapse-associated protein, putative [Schistosoma mansoni]	6e-22	NP_116185	>gi|19923855|ref|NP_116185.2| SYAP1 protein [Homo sapiens]	Q2_P18292
31513	371	63	Q2_P18293	NO	C800468.1	immunophilin ||immunophilin ||SJCHGC01391 protein [Schistosoma japonicum] ||PREDICTED: similar to FK506-binding protein FKBP59 homologue [Apis mellifera] ||PREDICTED: similar to FK506 binding protein 4 [Strongylocentrotus purpuratus] ||	TTTCAGAGCAGATGGCGTATGCAAATGTACTGAAAGAAAAAGCGAACAACTTTCTAAAGG	0	C800468.1	Smp_004780.2			Plus / Plus	Plus / Plus	Sense	CAZ28167.1	immunophilin, putative [Schistosoma mansoni]	2.5e-58	NP_002005	>gi|4503729|ref|NP_002005.1| FK506 binding protein 52 [Homo sapiens]	Q2_P34486,Q2_P14317,Q2_P31892,Q2_P18293
35913	423	43	Q2_P18294	NO	C800469.1	SJCHGC06283 protein [Schistosoma japonicum] ||PREDICTED: similar to ENSANGP00000020417 [Apis mellifera] ||translation initiation factor 4A-like protein [Echinococcus multilocularis] ||ENSANGP00000020417 [Anopheles gambiae str. PEST] ref|XP_312776.2| ENSANGP00000020417 [Anopheles gambiae str. PEST] ||CG7483-PA [Drosophila melanogaster] ref|NP_649788.2| CG7483-PA [Drosophila melanogaster] ||	GATGAAATGCCAATGAACGTTTCAGACCTTGTATAATTCTTGGCATTCTTTTCGTACTTT	0	C800469.1	Smp_034190.1			Plus / Plus	Plus / Plus	Sense	CAZ31102.1	DEAD box ATP-dependent RNA helicase, putative [Schistosoma mansoni]	0.0	NP_055555	>gi|7661920|ref|NP_055555.1| eukaryotic translation initiation factor 4A, isoform 3 [Homo sapiens]
39822	469	42	Q2_P18295	NO	C800470.1	SJCHGC04925 protein [Schistosoma japonicum] ||hypothetical protein [Homo sapiens] ||PREDICTED: similar to protein tyrosine phosphatase receptor type G precursor [Danio rerio] ||protein tyrosine phosphatase receptor type G precursor [Homo sapiens] sp|P23470|PTPRG_HUMAN Receptor-type tyrosine-protein phosphatase gamma precursor (Protein-tyrosine phosphatase gamma) (R-PTP-gamma) gb|AAA60224.1| recep…	TTGTACGGGCTTTCTTCACTATCCGAGTGTTTAGTGTTCGACATATCAAGACTAAACGTG	0	C800470.1	Smp_152750			Plus / Plus	Plus / Plus	Sense	CAZ33234.1	receptor protein tyrosine phosphatase, putative [Schistosoma mansoni]	1e-104	NP_002842	>gi|91208428|ref|NP_002842.2| protein tyrosine phosphatase, receptor-type, zeta1 precursor [Homo sapiens]	Q2_P41325,Q2_P40041,Q2_P18295,Q2_P19864,Q2_P40556,Q2_P01151,Q2_P27754,Q2_P08075,Q2_P07589,Q2_P41246
39298	463	28	Q2_P00152	NO	C800471.1	glucose transport protein ||SJCHGC02813 protein [Schistosoma japonicum] ||glucose transporter TGTP2 [Taenia solium] ||Zgc:92476 [Danio rerio] ref|NP_001002643.1| hypothetical protein LOC436916 [Danio rerio] ||glucose transporter 3 [Gadus morhua] ||	CAGGCGCTCGTGTTTCATTCTCTTATTTTCATTGAAATAAAACACTTTTTCCACCGAAAA	0	C800471.1	Smp_046790			Plus / Minus	Plus / Minus	Sense	CAZ32236.1	glucose transport protein, putative [Schistosoma mansoni]	6.6e-77	NP_000331	>gi|4557851|ref|NP_000331.1| solute carrier family 2 (facilitated glucose transporter), member 2 [Homo sapiens]
16166	191	16	Q2_P18296	NO	C800472.1	none	GATCATTGTAAAGAAGTTGAAACGAATAATTCCAAACGATGCAGAGAACTTCTTGAGGTA	0	C800472.1	Smp_142870			Plus / Plus	Plus / Plus	Sense	CAZ31409.1	hypothetical protein [Schistosoma mansoni]				Q2_P18296,Q2_P00153
11532	136	57	Q2_P18298	NO	C800474.1	similar to NM_065417 casein Kinase I in Caenorhabditis elegans [Schistosoma japonicum] ||casein kinase I [Ciona savignyi] ||PREDICTED: similar to casein kinase 1 alpha 1 [Apis mellifera] ||Casein kinase 1 alpha 1 [Mus musculus] ||casein kinase I alpha [Bombyx mori] ||	CTCAAATCTAACATTTTAGGGTGTTTGGGCATTAATTCTTTCTAACCGTTCATGTCTTTC	0	C800474.1	Smp_067810			Plus / Plus	Plus / Plus	Sense	CAZ34237.1	protein kinase [Schistosoma mansoni]	5e-139	NP_001883	>gi|68303572|ref|NP_001883.4| casein kinase 1, alpha 1 isoform 2 [Homo sapiens]
45000	530	35	Q2_P18299	NO	C800475.1	SJCHGC00596 protein [Schistosoma japonicum] ||hypothetical protein LOC290796 [Rattus norvegicus] gb|AAH78979.1| Similar to hypothetical protein MGC8721 [Rattus norvegicus] ||PREDICTED: similar to transmembrane protein 66 [Bos taurus] ||PREDICTED: similar to transmembrane protein 66 [Canis familiaris] ||Tmem66 protein [Mus musculus] dbj|BAE37240.1| unnamed protein product [Mus musculus] dbj|BAB252…	GTGTTCGGGGTTATTTTCTCCAACTTTGAACTCATTGTTTTGTTATCACCGAGTTTATTT	0	C800475.1	Smp_155510.2			Plus / Plus	Plus / Plus	Sense	CAZ33713.1	expressed protein [Schistosoma mansoni]
33796	398	51	Q2_P18300	NO	C800476.1	SJCHGC02831 protein [Schistosoma japonicum] ||eukaryotic translation initiation factor 3 subunit 2 beta 36kDa variant [Homo sapiens] ||eukaryotic translation initiation factor 3 subunit 2 beta 36kDa [Homo sapiens] gb|AAV38404.1| eukaryotic translation initiation factor 3 subunit 2 beta 36kDa [Homo sapiens] emb|CAI22322.1| eukaryotic translation initiation factor 3 subunit 2 beta 36kDa [Homo sapie…	GATTCTATCATTTAATTTATGAAGAAGAATTTGGTCGTGTCAAAGGACATTTCGGTCCTG	0	C800476.1	Smp_006000			Plus / Plus	Plus / Plus	Sense	CAZ28302.1	eukaryotictranslation initiation factor 3 subunit, putative [Schistosoma mansoni]	1.8e-38	NP_003748	>gi|4503513|ref|NP_003748.1| eukaryotic translation initiation factor 3, subunit 2 beta, 36kDa [Homo sapiens]	Q2_P18300
29195	344	40	Q2_P18301	NO	C800477.1	PREDICTED: similar to ENSANGP00000004373 [Apis mellifera] ||PREDICTED: similar to CG8841-PA isoform A isoform 3 [Strongylocentrotus purpuratus] ||PREDICTED: similar to CG8841-PA isoform A isoform 4 [Strongylocentrotus purpuratus] ||PREDICTED: similar to CG8841-PA isoform A isoform 1 [Strongylocentrotus purpuratus] ||hypothetical protein [Homo sapiens] ||	TCGTCACGCACTGCCATTATTTGCTTCTCTGTTAAACGTTGTTTGTGCATATGATCCTGT	0	C800477.1	Smp_050890			Plus / Plus	Plus / Plus	Sense	CAZ32626.1	expressed protein [Schistosoma mansoni]	9.3e-52	NP_085133	>gi|29825823|ref|NP_085133.1| hypothetical protein LOC283987 [Homo sapiens]	Q2_P18301,Q2_P30194,Q2_P05899,Q2_P41293,Q2_P10418
42269	498	24	Q2_P18302	NO	C800478.1	SJCHGC08769 protein [Schistosoma japonicum] ||unnamed protein product [Homo sapiens] ||MGC9712 protein [Homo sapiens] ||PREDICTED: similar to GA11327-PA [Apis mellifera] ||GA11327-PA [Drosophila pseudoobscura] ||	CTATTGATCCTACAGATATACTTGTTGATGCAGTTCACAATTTTCATCCTACTTATCGTC	0	C800478.1	Smp_076520			Plus / Plus	Plus / Plus	Sense	CAZ35058.1	organic solute transporter, putative [Schistosoma mansoni]	1.2e-77	NP_001091089	>gi|148276981|ref|NP_001091089.1| transmembrane protein 184A [Homo sapiens]	Q2_P18302
10129	120	14	Q2_P18303	NO	C800479.1	SJCHGC05311 protein [Schistosoma japonicum] ||	AAGAAGTTAAAGATATGACAGAGAAACGTGATCATGTGTCGGTGATGAGCGTAGACTTCT	0	C800479.1	Smp_059150			Plus / Plus	Plus / Plus	Sense	CAZ33437.1	expressed protein [Schistosoma mansoni]	3.7e-45	NP_001093639	>gi|154354962|ref|NP_001093639.1| inner membrane protein, mitochondrial isoform 2 [Homo sapiens]	Q2_P18303,Q2_P24557,Q2_P31267
19219	227	9	Q2_P18304	NO	C800480.1	none	CCGACTAGATCACGAAGTCAACCAGCTGAAAAATTTGGCAAAATTAAATCTAACTTACAT	0	C800480.1	Smp_194390			Plus / Plus	Plus / Plus	Sense	CAZ39076.1	suppressor of cytokine signaling, putative [Schistosoma mansoni]				Q2_P18304,Q2_P00155
35992	424	37	Q2_P18305	NO	C800481.1	SJCHGC04146 protein [Schistosoma japonicum] ||	CTAGTCTGTCGTCAGCTATTATTATTCCCTATCGTAAAAGAATACAACATTTACGAGTGT	0	C800481.1	Smp_146430			Plus / Plus	Plus / Plus	Sense	CAZ32057.1	beta-1,4-galactosyltransferase, putative [Schistosoma mansoni]	1.2e-24	NP_003770	>gi|4502349|ref|NP_003770.1| UDP-Gal:betaGlcNAc beta 1,4- galactosyltransferase 3 [Homo sapiens]	Q2_P18305
10613	125	73	Q2_P00156	NO	C800482.1	ARP3 actin-related protein 3 homolog [Mus musculus] gb|AAH80806.1| Actr3 protein [Mus musculus] gb|AAH98014.1| ARP3 actin-related protein 3 homolog [Rattus norvegicus] gb|AAH05557.1| ARP3 actin-related protein 3 homolog [Mus musculus] ref|NP_112330.1| ARP3 actin-related protein 3 homolog [Rattus norvegicus] dbj|BAE26491.1| unnamed protein product [Mus musculus] dbj|BAE31704.1| unnamed protein pro…	TTGTATTAAGCATATACCAATAGCTGGACGTGACATTACTTCTTTCATTCAACACTTGCT	0	C800482.1	Smp_130310			Plus / Minus	Plus / Minus	Sense	CAZ29203.1	prolyl oligopeptidase (S09 family) [Schistosoma mansoni]	3e-180	NP_005712	>gi|5031573|ref|NP_005712.1| ARP3 actin-related protein 3 homolog [Homo sapiens]	Q2_P32302,Q2_P00156,Q2_P19857,Q2_P01144,Q2_P14004,Q2_P33875,Q2_P07159,Q2_P22180,Q2_P39184,Q2_P10548,Q2_P30329,Q2_P31223,Q2_P11439,Q2_P00033
24447	288	52	Q2_P18306	NO	C800483.1	Peptidylprolyl isomerase-like 3 [Mus musculus] ref|NP_081627.1| peptidylprolyl isomerase-like 3 isoform 1 [Mus musculus] gb|AAH61645.1| Ppil3 protein [Mus musculus] dbj|BAB26768.1| unnamed protein product [Mus musculus] sp|Q9D6L8|PPIL3_MOUSE Peptidyl-prolyl cis-trans isomerase-like 3 (PPIase) (Rotamase) (Cyclophilin-like protein PPIL3) (CYP10L) ||peptidylprolyl isomerase-like protein 3 isoform PP…	GGATGTTTTGGATGAATTAGAGCGTTCACCTGTTGAAGAAAAAACTTATAGACCTTTAAC	0	C800483.1	Smp_080150			Plus / Plus	Plus / Plus	Sense	CAZ35363.1	peptidyl-prolyl cis-trans isomerase-like 3, putative (ppiase)(rotamase) (cyclophilin-like protein ppil3) (cyp10l) [Schistosoma mansoni]	4.9e-60	NP_570981	>gi|19557636|ref|NP_570981.1| peptidylprolyl isomerase-like 3 isoform PPIL3b [Homo sapiens]	Q2_P18306
41562	489	82	Q2_P18308	NO	C800485.1	SJCHGC00605 protein [Schistosoma japonicum] ||PREDICTED: similar to SH3-containing GRB2-like protein 1 (SH3 domain protein 2B) (Extra eleven-nineteen leukemia fusion gene) (EEN) (EEN fusion partner of MLL) isoform 2 [Canis familiaris] ||PREDICTED: similar to SH3-containing GRB2-like protein 1 (SH3 domain protein 2B) (Extra eleven-nineteen leukemia fusion gene) (EEN) (EEN fusion partner of MLL) is…	CTATCCCTTGCTCTATTCTTACGTCTTCCATCTAATTTAATTGTGCCTGAAACATTATCA	0	C800485.1	Smp_122030			Plus / Plus	Plus / Plus	Sense	CAZ39132.1	sh3-containing grb2-like protein 1 (endophilin II) [Schistosoma mansoni]	1.9e-44	NP_003016	>gi|4506929|ref|NP_003016.1| SH3-domain GRB2-like 1 [Homo sapiens]
42606	502	21	Q2_P18309	NO	C800486.1	similar to GenBank Accession Number M10078 rho protein in Aplysia californica [Schistosoma japonicum] ||RAS-like GTP-binding protein RHO gb|AAA27776.1| rho protein ||guanine nucleotide-binding protein Rho [Biomphalaria glabrata] ||CG8416-PG isoform G [Drosophila melanogaster] gb|AAS64843.1| CG8416-PF isoform F [Drosophila melanogaster] gb|AAS64842.1| CG8416-PE isoform E [Drosophila melanogaster] …	GTACAAATTCTTGCTTGGCTTTTGTAGCTCATTGTCATTGACAGAGATTCATCAAAGTAA	0	C800486.1	Smp_104110			Plus / Plus	Plus / Plus	Sense	CAY18059.1	gtpase_rho, putative [Schistosoma mansoni]	1.5e-70	NP_001655	>gi|10835049|ref|NP_001655.1| ras homolog gene family, member A [Homo sapiens]
25162	297	2	Q2_P18311	NO	C800488.1	SJCHGC02825 protein [Schistosoma japonicum] ||PREDICTED: similar to GA21564-PA [Apis mellifera] ref|XP_394486.2| PREDICTED: similar to GA21564-PA [Apis mellifera] ||PREDICTED: similar to KIAA0851 protein [Gallus gallus] ||MGC84016 protein [Xenopus laevis] gb|AAH74260.1| MGC84016 protein [Xenopus laevis] ||SAC1 (supressor of actin mutations 1 homolog)-like [Rattus norvegicus] ref|XP_579577.1| PRED…	ATCGCTTCGATTACTGTGTACCTATCATTCAAGGATATGTTGGAATAATATCATATCCGG	0	C800488.1	Smp_060420.6			Plus / Plus	Plus / Plus	Sense						Q2_P22092,Q2_P21985,Q2_P16847,Q2_P34833,Q2_P15407,Q2_P35342,Q2_P18311,Q2_P29315,Q2_P16311,Q2_P36560,Q2_P27852,Q2_P08166,Q2_P38531,Q2_P39671,Q2_P06562,Q2_P37186
3048	36	73	Q2_P00159	NO	C800489.1	none	CCTTTGTAAATTCTACTCAGTCTTACCCTTTTTCACCTAATCCATTGTAATTAGTCATGG	0	C800489.1	Smp_134120			Plus / Minus	Plus / Minus	Sense	CAZ29889.1	expressed protein [Schistosoma mansoni]
26741	315	51	Q2_P18313	NO	C800490.1	SJCHGC08083 protein [Schistosoma japonicum] ||ENSANGP00000014086 [Anopheles gambiae str. PEST] ref|XP_320767.2| ENSANGP00000014086 [Anopheles gambiae str. PEST] ||GA19476-PA [Drosophila pseudoobscura] ||PREDICTED: similar to CG10173-PA [Apis mellifera] ||CG6264-PA [Drosophila melanogaster] gb|AAR99659.1| bestrophin 1 [Drosophila melanogaster] ref|NP_652603.1| CG6264-PA [Drosophila melanogaster] g…	GTCAATTGATGCAAGGTGAAGTTGTTCGTACATCACCATCTAAATCAATATTACAACAAC	0	C800490.1	Smp_179490			Plus / Plus	Plus / Plus	Sense	CAZ37335.1	bestrophin-related [Schistosoma mansoni]	1.7e-23	NP_004174	>gi|4759310|ref|NP_004174.1| bestrophin 1 isoform 1 [Homo sapiens]
28735	339	5	Q2_P18314	NO	C800491.1	none	TGGGCTGCACAAATACGTCGTGAATCAGTTACACCAACACAATTACAACAATCTAAAAAA	0	C800491.1	Smp_128760			Plus / Plus	Plus / Plus	Sense	CAZ28924.1	hypothetical protein [Schistosoma mansoni]				Q2_P18314,Q2_P00160,Q2_P17790,Q2_P04410,Q2_P38266,Q2_P23915
35333	416	58	Q2_P00161	NO	C800492.1	SJCHGC08157 protein [Schistosoma japonicum] ||LOC398095 protein [Xenopus laevis] ||Programmed cell death 6-interacting protein (Signal transduction protein Xp95) gb|AAD20341.1| putative signal tranduction protein Xp95 [Xenopus laevis] ||PREDICTED: similar to Programmed cell death 6 interacting protein (ALG-2 interacting protein X) (ALG-2 interacting protein 1) (E2F1-inducible protein) (Eig2) [Str…	CCTGGACAACCTTCTGCACAGCCTTAAAAAGATTCCCCTATTAACATATGATTTTTATTA	0	C800492.1	Smp_087620.2			Plus / Minus	Plus / Minus	Sense						Q2_P34890,Q2_P19349,Q2_P15007,Q2_P34927,Q2_P00161,Q2_P37376,Q2_P03550,Q2_P34720,Q2_P11531,Q2_P31329,Q2_P17018,Q2_P22863
45099	531	49	Q2_P18315	NO	C800493.1	SJCHGC06425 protein [Schistosoma japonicum] ||TATA-binding protein [Eptatretus stoutii] ||TATA-binding protein 2 [Xenopus laevis] ||DNA-binding protein sp|P53361|TF2D_SPOFR Transcription initiation factor TFIID (TATA-box factor) (TATA sequence-binding protein) (TBP) ||TBP [Bombyx mori] sp|O45211|TF2D_BOMMO Transcription initiation factor TFIID (TATA-box factor) (TATA sequence-binding protein) (TB…	TGATCTGAAATTTCCGATACGTTTGGAAGGTGTACAGTTGGCCAATGAACAGATGACACA	0	C800493.1	Smp_073680.2			Plus / Plus	Plus / Plus	Sense	CAZ34781.1	TATA-box binding protein, putative [Schistosoma mansoni]	2.8e-63	NP_950248	>gi|39930602|ref|NP_950248.1| TATA box binding protein like 2 [Homo sapiens]	Q2_P13270,Q2_P33122,Q2_P28458,Q2_P36098,Q2_P08749,Q2_P18315
29673	350	8	Q2_P18316	NO	C800494.1	similar to GenBank Accession Number AF112206 ras-related protein rab-14 [Schistosoma japonicum] ||PREDICTED: similar to RAB14 member RAS oncogene family [Strongylocentrotus purpuratus] ||RAB14 member RAS oncogene family [Danio rerio] ref|XP_702514.1| PREDICTED: hypothetical protein XP_697422 [Danio rerio] ref|NP_958903.1| RAB14 member RAS oncogene family [Danio rerio] ||RAB14 member RAS oncogene …	GTGATCTTTTGTATGTGGTTGTAAAAAGATGCAACTCTTTCCACTTTGATTTGAGTCAAC	0	C800494.1	Smp_004910			Plus / Plus	Plus / Plus	Sense	CAZ28182.1	rab-2,4,14, putative [Schistosoma mansoni]	2.2e-85	NP_057406	>gi|19923483|ref|NP_057406.2| GTPase Rab14 [Homo sapiens]
14933	176	58	Q2_P18317	NO	C800495.1	SJCHGC02194 protein [Schistosoma japonicum] ||	GCTCGTACACAAGTTGCTAAATAATCGTTTGTAAATGTACATCCCGATTTTTAATACCTC	0	C800495.1	Smp_049170			Plus / Plus	Plus / Plus	Sense	CAZ32457.1	camp-regulated phosphoprotein, putative [Schistosoma mansoni]				Q2_P18317
41661	491	11	Q2_P18319	NO	C800497.1	CG18009-PD isoform D [Drosophila melanogaster] gb|AAF46369.3| CG18009-PA isoform A [Drosophila melanogaster] ref|NP_996377.1| CG18009-PA isoform A [Drosophila melanogaster] ref|NP_511084.2| CG18009-PD isoform D [Drosophila melanogaster] gb|AAL39699.1| LD27895p [Drosophila melanogaster] ||TATA box binding protein-related factor 2 [Drosophila melanogaster] ||TBP-like factor [Drosophila melanogaster…	CAGTTTAGATTCAATCGGTTCGTTAGTCGAAGAACTAGTTCCAATCGCTGCATTGCATCA	0	C800497.1	Smp_087520			Plus / Plus	Plus / Plus	Sense	CAZ36048.1	TATA-binding protein-related [Schistosoma mansoni]	3.7e-29	NP_004856	>gi|4759234|ref|NP_004856.1| TBP-like 1 [Homo sapiens]	Q2_P20351,Q2_P01499,Q2_P18319,Q2_P03826,Q2_P38156,Q2_P23181,Q2_P17695
14397	170	32	Q2_P18320	NO	C800498.1	SJCHGC06871 protein [Schistosoma japonicum] ||SJCHGC06460 protein [Schistosoma japonicum] ||SJCHGC05504 protein [Schistosoma japonicum] ||SJCHGC06760 protein [Schistosoma japonicum] ||annexin [Schistosoma mansoni] ||	GGACAAGTTCTTGAAGATTTGCTACTTTGCGAAATGTCAATGGTAAAGTTATGTAAACGA	0	C800498.1	Smp_077880.2			Plus / Plus	Plus / Plus	Sense	CAZ35198.1	annexin, putative [Schistosoma mansoni]
24996	295	6	Q2_P18321	NO	C800499.1	creatine kinase (EC 2.7.3.2) - fluke (Schistosoma mansoni) sp|P16641|SMC7_SCHMA ATP:guanidino kinase SMC74 (ATP:guanidino phosphotransferase) gb|AAA29927.1| ATP:guanidino kinase (Smc74) ||SJCHGC04932 protein [Schistosoma japonicum] ||arginine kinase [Sepioteuthis lessoniana] ||arginine kinase [Liolophura japonica] sp|O15990|KARG_LIOJA ARGININE KINASE (AK) ||arginine kinase [Nautilus pompilius] ||	ATGCCAGTTGAGCCATTAACTTACCTGGCCAAACTGTTGGAAGGTGCTTCGATCGAAAAA	0	C800499.1	Smp_194770			Plus / Plus	Plus / Plus	Sense	CAZ39130.1	ATP:guanidino kinase (Smc74), putative [Schistosoma mansoni]	4.6e-55	NP_001814	>gi|21536286|ref|NP_001814.2| brain creatine kinase [Homo sapiens]	Q2_P14960,Q2_P34886,Q2_P24121,Q2_P18321,Q2_P32877
18542	219	12	Q2_P18322	NO	C800500.1	apoferritin-2 [Schistosoma japonicum] ||putative ferritin [Oncometopia nigricans] ||putative ferritin GF2 [Homalodisca coagulata] ||chloroplast ferritin precursor [Vigna angularis] ||ferritin [Malus xiaojinensis] sp|Q94FY2|FRI_MALXI Ferritin chloroplast precursor (Apf1) ||	CGACTACATTTGGATAATAGTGCTGTTTATCTGATGGATAAAGAATTTCGTTGAACTGGT	0	C800500.1	Smp_063530.2			Plus / Plus	Plus / Plus	Sense	CAZ33862.1	apoferritin-2 [Schistosoma mansoni]				Q2_P24610,Q2_P18322
10567	125	27	Q2_P18323	NO	C800501.1	SJCHGC07083 protein [Schistosoma japonicum] ||PREDICTED: similar to CG9281-PB isoform B [Apis mellifera] ||ENSANGP00000010790 [Anopheles gambiae str. PEST] ref|XP_312228.2| ENSANGP00000010790 [Anopheles gambiae str. PEST] ||PREDICTED: similar to ATP-binding cassette sub-family F (GCN20) member 2 isoform 3 [Strongylocentrotus purpuratus] ||PREDICTED: similar to ATP-binding cassette sub-family F (G…	CACAGATTTCTCATTTCGTTTCTTTCCTGGATGAAAATAGTAACTTTCGAGATTCAGTTG	0	C800501.1	Smp_040540			Plus / Plus	Plus / Plus	Sense	CAZ31645.1	ATP-dependent transporter, putative [Schistosoma mansoni]	0.0	NP_005683	>gi|10947137|ref|NP_005683.2| ATP-binding cassette, sub-family F, member 2 isoform b [Homo sapiens]
19234	227	24	Q2_P18324	NO	C800502.1	PREDICTED: similar to CG6896-PA [Apis mellifera] ||hypothetical protein [Gallus gallus] ref|NP_001026022.1| similar to CAAX box protein TIMAP [Gallus gallus] ||ENSANGP00000015633 [Anopheles gambiae str. PEST] ref|XP_320528.2| ENSANGP00000015633 [Anopheles gambiae str. PEST] ||CG6896-PA [Drosophila melanogaster] gb|AAL68242.1| LD46604p [Drosophila melanogaster] ref|NP_649049.1| CG6896-PA [Drosophi…	TGAAAATGTCGGCACATTGACACGACGACCTCAACAAACAGAATACGGGAGTAAATCTCC	0	C800502.1	Smp_058450			Plus / Plus	Plus / Plus	Sense	CAZ33375.1	protein phosphatase 1 regulatory inhibitor subunit 16a, putative [Schistosoma mansoni]	1.6e-83	NP_056383	>gi|28626517|ref|NP_056383.1| protein phosphatase 1 regulatory inhibitor subunit 16B [Homo sapiens]	Q2_P18324,Q2_P05099,Q2_P40278,Q2_P38805
5810	69	30	Q2_P18325	NO	C800503.1	SJCHGC03965 protein [Schistosoma japonicum] ||	AACCCACCCTAATCTCGGGCAAGATAAAGATAAGTAAAACGTAAATATTCCTACGTTTAG	0	C800503.1	Smp_178740			Plus / Plus	Plus / Plus	Sense	CAZ37241.1	tesmin-related [Schistosoma mansoni]	9.4e-59	NP_919258	>gi|169234719|ref|NP_919258.2| lin-54 homolog isoform a [Homo sapiens]	Q2_P12462,Q2_P18325,Q2_P32256
3011	36	36	Q2_P18326	NO	C800504.1	none	GCACAATTTGTTATCATGGTAACAAGACCTTCCCTTTCATTGAATAAAGTTACCAGAAGT	0	C800504.1	Smp_021960			Plus / Plus	Plus / Plus	Sense	CAZ29866.1	expressed protein [Schistosoma mansoni]				Q2_P18326,Q2_P29626,Q2_P09886,Q2_P00162
44953	529	73	Q2_P18327	NO	C800505.1	SJCHGC01371 protein [Schistosoma japonicum] ||actin-binding and severin family group-like protein [Echinococcus granulosus] ||actin-filament fragmenting protein [Echinococcus granulosus] ||actin-filament fragmenting protein [Echinococcus granulosus] sp|Q24800|SEVE_ECHGR Severin ||actin modulator protein [Echinococcus multilocularis] ||	CAGTTAGAAAAAGAAAGGGGAATCATCATGTCAACTAAAAGAAAAGCGGAGTGAAATTTC	0	C800505.1	Smp_008660.1			Plus / Plus	Plus / Plus	Sense	CAZ28573.1	gelsolin, putative [Schistosoma mansoni]	9.7e-48	NP_000168	>gi|4504165|ref|NP_000168.1| gelsolin isoform a precursor [Homo sapiens]
37434	441	34	Q2_P18328	NO	C800506.1	CG33517-PA isoform A [Drosophila melanogaster] gb|AAN15957.1| dopamine 2-like receptor DD2R-461 [Drosophila melanogaster] ref|NP_001014760.1| CG33517-PA isoform A [Drosophila melanogaster] ||CG33517-PC isoform C [Drosophila melanogaster] ref|NP_001014758.1| CG33517-PC isoform C [Drosophila melanogaster] ||CG33517-PD isoform D [Drosophila melanogaster] gb|AAN15956.1| dopamine 2-like receptor DD2R-…	GCGTCTTGGTACTGTACTATGTGACATATTTATTATGTTTGATGTACTTTTGTGTACAGC	0	C800506.1	Smp_127310			Plus / Plus	Plus / Plus	Sense	CAZ28673.1	biogenic amine (dopamine) receptor, putative [Schistosoma mansoni]	4.8e-42	NP_000786	>gi|4503385|ref|NP_000786.1| dopamine receptor D2 isoform long [Homo sapiens]	Q2_P18328
35136	414	31	Q2_P18329	NO	C800507.1	SJCHGC07226 protein [Schistosoma japonicum] ||PREDICTED: similar to GA15838-PA [Apis mellifera] ||PREDICTED: similar to Histone-lysine N-methyltransferase H3 lysine-9 specific 4 (Histone H3-K9 methyltransferase 4) (H3-K9-HMTase 4) (SET domain bifurcated 1) (ERG-associated protein with SET domain) (ESET) [Bos taurus] ||SET domain bifurcated 1 [Mus musculus] gb|AAO73535.2| SET domain ERG-associated…	GTATCCTCAGCGTCCCATGGTGAGACTGAAACCTGGACAGACTGTTGAAACTGAATTGGA	0	C800507.1	Smp_150850.1			Plus / Plus	Plus / Plus	Sense	CAZ32892.1	histone-lysine n-methyltransferase, setb1, putative [Schistosoma mansoni]	1.7e-26	NP_001138887	>gi|224177467|ref|NP_001138887.1| SET domain, bifurcated 1 isoform 1 [Homo sapiens]
26400	311	50	Q2_P18330	NO	C800508.1	SJCHGC05583 protein [Schistosoma japonicum] ||	GGCTTGCAATTGTAAATATACAAAATCGACAACGCTCGAATTCCCCCAGACGTTTTACTC	0	C800508.1	Smp_148870			Plus / Plus	Plus / Plus	Sense	CAZ32538.1	expressed protein [Schistosoma mansoni]				Q2_P18330,Q2_P11856,Q2_P31662
37422	441	22	Q2_P18331	NO	C800509.1	SJCHGC01295 protein [Schistosoma japonicum] ||unknown [Schistosoma japonicum] ||SJCHGC02740 protein [Schistosoma japonicum] ||	AGGGCCATCTAACTCCGACCATAATAATAAAATGTATCCCAAGACCCCCAACATATCAAC	0	C800509.1	Smp_102330			Plus / Plus	Plus / Plus	Sense	CAZ37281.1	expressed protein [Schistosoma mansoni]				Q2_P22217,Q2_P18331
37517	442	32	Q2_P18332	NO	C800510.1	glucose transport protein ||TGTP1 [Taenia solium] ||glucose transport protein ||SJCHGC06671 protein [Schistosoma japonicum] ||glucose transporter 3 [Gadus morhua] ||	GAAGTGACAATGACAAAGGTATGTATGCATAAAGGAGTTTTTGGAATATGCTTACAGAAC	0	C800510.1	Smp_012440			Plus / Plus	Plus / Plus	Sense	CAZ28938.1	glucose transport protein, putative [Schistosoma mansoni]	7.3e-66	NP_001033	>gi|4507011|ref|NP_001033.1| glucose transporter 4 [Homo sapiens]	Q2_P18332
2815	34	10	Q2_P18334	NO	C800512.1	SJCHGC02796 protein [Schistosoma japonicum] ||	TCTCGATCTGATTAATATTGTTCCTCGAAATTGAACTGCCTTCGTCATTGACTGTTTTTT	0	C800512.1	Smp_080370.2			Plus / Plus	Plus / Plus	Sense	CAZ35383.1	expressed protein [Schistosoma mansoni]				Q2_P33455,Q2_P18334,Q2_P32743,Q2_P00943
15937	188	42	Q2_P18335	NO	C800513.1	SJCHGC08284 protein [Schistosoma japonicum] ||solute carrier family 39 (zinc transporter) member 10 [Mus musculus] gb|AAH52880.1| Solute carrier family 39 (zinc transporter) member 10 [Mus musculus] gb|AAH62918.1| Solute carrier family 39 (zinc transporter) member 10 [Mus musculus] ||PREDICTED: similar to CG6817-PA [Apis mellifera] ||mKIAA1265 protein [Mus musculus] ||PREDICTED: similar to solute…	TCGACATTCTTTATAGCTATGCAGAGGAATATGATGAGCTTACAAGAAGATCTTCACAGG	0	C800513.1	Smp_167630			Plus / Plus	Plus / Plus	Sense	CAZ35722.1	solute carrier family, putative [Schistosoma mansoni]	1.3e-49	NP_065075	>gi|55741750|ref|NP_065075.1| solute carrier family 39 (zinc transporter), member 10 [Homo sapiens]	Q2_P18335,Q2_P16312,Q2_P36561
45160	532	25	Q2_P18336	NO	C800514.1	serine/threonine kinase 25 (STE20 homolog yeast) [Gallus gallus] gb|AAQ55286.1| serine/threonine kinase 25 [Gallus gallus] ||serine/threonine kinase 25 [Bos taurus] gb|AAQ55285.1| serine/threonine kinase 25 [Bos taurus] ||STK25 protein [Bos taurus] ||STK25 protein [Homo sapiens] ||serine/threonine kinase 25 [Homo sapiens] gb|AAV38764.1| serine/threonine kinase 25 (STE20 homolog yeast) [Homo sapie…	AGCTAAAGGAGAACCACCTAATGCTGACCTACATCCAATACGTGTTCTCATGCTTATTCC	0	C800514.1	Smp_096640			Plus / Plus	Plus / Plus	Sense	CAZ36786.1	serine/threonine kinase [Schistosoma mansoni]	1e-106	NP_006365	>gi|21361358|ref|NP_006365.2| serine/threonine kinase 25 [Homo sapiens]	Q2_P18336,Q2_P39518,Q2_P03724,Q2_P23048
10859	128	64	Q2_P18337	NO	C800515.1	IMP25 [Schistosoma mansoni] ||SJCHGC06563 protein [Schistosoma japonicum] ||unnamed protein product [Tetraodon nigroviridis] ||endobrevin [Mus musculus] sp|O70404|VAMP8_MOUSE Vesicle-associated membrane protein 8 (VAMP-8) (Endobrevin) (Edb) gb|AAC23665.1| vesicle associated membrane protein 8 VAMP 8 [Mus musculus] gb|AAC06371.1| endobrevin [Mus musculus] ||Vesicle-associated membrane protein 8 [M…	CCGTGCCCTGTCCTTTTTACTTCTCTACAGATAATTTAAAGTATACTCATTTCTGTACTA	0	C800515.1	Smp_055870			Plus / Plus	Plus / Plus	Sense	CAZ33101.1	expressed protein [Schistosoma mansoni]
39995	471	45	Q2_P18338	NO	C800516.1	SJCHGC09253 protein [Schistosoma japonicum] ||ENSANGP00000014831 [Anopheles gambiae str. PEST] ref|XP_319006.2| ENSANGP00000014831 [Anopheles gambiae str. PEST] ||	GAGGAAGCCGACGACAATGAGGATTACGATGAATAAACAGCAACAAATTGAATTATTAAA	0	C800516.1	Smp_088660			Plus / Plus	Plus / Plus	Sense	CAZ36138.1	expressed protein [Schistosoma mansoni]				Q2_P18338
13592	160	77	Q2_P18340	NO	C800518.1	SJCHGC08022 protein [Schistosoma japonicum] ||CG7940-PA [Drosophila melanogaster] ref|NP_650684.1| CG7940-PA [Drosophila melanogaster] gb|AAL39676.1| LD24983p [Drosophila melanogaster] ||GA20705-PA [Drosophila pseudoobscura] ||PREDICTED: similar to ENSANGP00000003921 [Apis mellifera] ||hypothetical protein DDB0184033 [Dictyostelium discoideum] gb|EAL61560.1| hypothetical protein DDB0184033 [Dicty…	ACAGATACACCGTTAGTTCTTAATCCTTTGATACAAGCCGCTCGTCGTCTCCACACAGGA	0	C800518.1	Smp_125790			Plus / Plus	Plus / Plus	Sense	CAZ28370.1	actin-related protein 5, arp5 [Schistosoma mansoni]	3.9e-47	NP_079131	>gi|151301041|ref|NP_079131.3| ARP5 actin-related protein 5 homolog [Homo sapiens]	Q2_P18340,Q2_P15806,Q2_P29717,Q2_P10403,Q2_P01402,Q2_P25929,Q2_P27076,Q2_P10315,Q2_P30091,Q2_P06382
12386	146	61	Q2_P18343	NO	C800521.1	SJCHGC02087 protein [Schistosoma japonicum] ||probable microsomal signal peptidase 22 kDa subunit [Ixodes scapularis] ||ENSANGP00000018480 [Anopheles gambiae str. PEST] ref|XP_309295.2| ENSANGP00000018480 [Anopheles gambiae str. PEST] ||GA19051-PA [Drosophila pseudoobscura] ||CG5677-PA [Drosophila melanogaster] ref|NP_651234.1| CG5677-PA [Drosophila melanogaster] gb|AAL48086.1| RE71708p [Drosophi…	GCCAGCAGCAGTGCTGGATATGTAACATGTGATAAATAAAATGTTTGGGAATGCCTTAAA	0	C800521.1	Smp_175420			Plus / Plus	Plus / Plus	Sense	CAZ36828.1	microsomal signal peptidase 23 kD subunit (spc22/23), putative [Schistosoma mansoni]	4e-40	NP_068747	>gi|11345462|ref|NP_068747.1| signal peptidase complex subunit 3 [Homo sapiens]
36170	426	45	Q2_P00167	NO	C800522.1	Triosephosphate isomerase (TIM) (Triose-phosphate isomerase) gb|AAA29941.1| triose phosphate isomerase gb|AAA29919.1| triose phosphate isomerase ||similar to GenBank Accession Number L07286 triosephosphate isomerase [Schistosoma japonicum] ||triose-phosphate isomerase [Orientobilharzia turkestanicum] ||Triosephosphate isomerase (TIM) (Triose-phosphate isomerase) gb|AAC47393.1| triosephosphate iso…	GGTCTTCTTCTTCTTACGCTTCTAAATTTTGTCTCTTCTCATGTCAGTTACTTGCTTTTT	0	C800522.1	Smp_003990			Plus / Minus	Plus / Minus	Sense	CAZ28091.1	triosephosphate isomerase, putative [Schistosoma mansoni]	1.2e-88	NP_000356	>gi|4507645|ref|NP_000356.1| triosephosphate isomerase 1 isoform 1 [Homo sapiens]
13755	162	70	Q2_P18344	NO	C800523.1	tetraspanin TE736 [Schistosoma japonicum] ||similar to GenBank Accession Number AF036955 tetraspanin TE736 in Schistosoma japonicum ||SJCHGC02060 protein [Schistosoma japonicum] ||SJCHGC01764 protein [Schistosoma japonicum] ||unknown [Schistosoma japonicum] ||	GACGACATTCAACAAAACTGTTCGTTTTCTTCAACTGTCTTTTCATTGTAAGTGGAATGT	0	C800523.1	Smp_154200			Plus / Plus	Plus / Plus	Sense	CAZ33485.1	CD63 antigen, putative [Schistosoma mansoni]
16574	195	84	Q2_P18345	NO	C800524.1	unknown [Schistosoma japonicum] ||unknown [Schistosoma japonicum] ||tetraspanin TE736 [Schistosoma japonicum] ||SJCHGC01209 protein [Schistosoma japonicum] ||SJCHGC02060 protein [Schistosoma japonicum] ||	CCGGACTCAAATGATGAAGATGTTGGTTGATGTTGCTAAATCTGAACTATATACTTCATA	0	C800524.1	Smp_194970			Plus / Plus	Plus / Plus	Sense	CAZ35783.1	similar to tetraspanin TE736 [Schistosoma mansoni]
35700	420	85	Q2_P18346	NO	C800525.1	SJCHGC09420 protein [Schistosoma japonicum] ||SJCHGC02518 protein [Schistosoma japonicum] ||hypothetical protein conserved [Leishmania major] ||Viral A-type inclusion protein repeat putative [Entamoeba histolytica HM-1:IMSS] gb|EAL48061.1| Viral A-type inclusion protein repeat putative [Entamoeba histolytica HM-1:IMSS] ||kinesin K39 putative [Leishmania major] ||	GTCAAAGAAATCCTACAAGACAAATCGATTCTCCCCGGATATCTTATTAGTTTTGTTATG	0	C800525.1	Smp_171540.3			Plus / Plus	Plus / Plus	Sense	CAZ36300.1	Ribosome-binding protein 1 (Ribosome receptor protein) (mRRp), putative [Schistosoma mansoni]	5.9e-22	NP_001093582	>gi|153791586|ref|NP_001093582.1| myosin, heavy chain 2, skeletal muscle, adult [Homo sapiens]
13944	165	4	Q2_P18347	NO	C800526.1	hypothetical protein [Schistosoma japonicum] ||	GCGTAATACATGGTATTCACGATATGACACTTTCCCTTTCTAAAGTTCTCATAAATACTG	0	C800526.1	Smp_063330			Plus / Plus	Plus / Plus	Sense	CAZ33842.1	hypothetical protein [Schistosoma mansoni]				Q2_P18347
30617	361	17	Q2_P18350	NO	C800529.1	SJCHGC06365 protein [Schistosoma japonicum] ||SJCHGC03060 protein [Schistosoma japonicum] ||Nucleobindin 2b [Danio rerio] ref|NP_958887.1| nucleobindin 2b [Danio rerio] ||Nucb2b protein [Danio rerio] ||Hypothetical protein CBG17177 [Caenorhabditis briggsae] ||	GGTTTCTCGTGATGAATTTCTAAGAGGTGTTAATCAGCCTTATCCATCATATGATCGTGA	0	C800529.1	Smp_144560			Plus / Plus	Plus / Plus	Sense	CAZ31698.1	nucleobindin, putative [Schistosoma mansoni]				Q2_P18350,Q2_P02210,Q2_P28182,Q2_P08476,Q2_P21244
35214	415	24	Q2_P18351	NO	C800530.1	hypothetical protein [Gallus gallus] ref|NP_001012806.1| epsin 2 [Gallus gallus] ||PREDICTED: similar to CG8532-PA isoform A [Apis mellifera] ||ENSANGP00000017935 [Anopheles gambiae str. PEST] ref|XP_308436.2| ENSANGP00000017935 [Anopheles gambiae str. PEST] ||epsin 2 [Mus musculus] ||epsin 2 [Mus musculus] ||	CGTCCACTTCTAATACAAACACTGAATCAGTTATTTCTAGCCAACATCATCATACTAACA	0	C800530.1	Smp_031100			Plus / Plus	Plus / Plus	Sense	CAZ30797.1	liquid facets, putative [Schistosoma mansoni]	1.4e-63	NP_683723	>gi|156671217|ref|NP_683723.2| epsin 2 isoform a [Homo sapiens]
21823	257	63	Q2_P18352	NO	C800532.1	SJCHGC08857 protein [Schistosoma japonicum] ||SJCHGC03531 protein [Schistosoma japonicum] ||	GAGACATACGCGTATTTTACTACTTCAGCATTTCACTGGCTATTTAAAAGTACTAACTGA	0	C800532.1	Smp_124770.2			Plus / Plus	Plus / Plus	Sense	CAZ28179.1	scy1(yeast) protein kinase-like [Schistosoma mansoni]				Q2_P18352,Q2_P37125,Q2_P16793,Q2_P36417,Q2_P17506,Q2_P16167,Q2_P37970
44735	527	25	Q2_P00168	NO	C800534.1	SJCHGC06410 protein [Schistosoma japonicum] ||	GTGTCAAACTGATATCTTTGTTTTTCGCTGACCTGATTTCTATCTGTCCGTATGATTTTA	0	C800534.1	Smp_036060			Plus / Minus	Plus / Minus	Sense	CAZ31201.1	expressed protein [Schistosoma mansoni]
39188	462	3	Q2_P18353	NO	C800535.1	SJCHGC07509 protein [Schistosoma japonicum] ||	CAAAATCTGAGAAACTCACAAAACACCGATATTGGTCAATCGAGATCAAATATGCTGAAT	0	C800535.1	Smp_065420			Plus / Plus	Plus / Plus	Sense	CAZ34026.1	expressed protein [Schistosoma mansoni]
28794	339	64	Q2_P18354	NO	C800536.1	similar to XM_127879 expressed sequence AW554959 in Mus musculus [Schistosoma japonicum] ||PREDICTED: hypothetical protein XP_844791 isoform 1 [Canis familiaris] ||PREDICTED: hypothetical protein XP_854978 isoform 4 [Canis familiaris] ref|XP_859956.1| PREDICTED: hypothetical protein XP_854863 isoform 2 [Canis familiaris] ||PREDICTED: hypothetical protein XP_854903 isoform 3 [Canis familiaris] ||	CTTATTTTATCATTGCACGCAGTTGATCTTCTTAGTCATAGAGGAACTCGGAGTTTTGAT	0	C800536.1	Smp_124650			Plus / Plus	Plus / Plus	Sense	CAZ28157.1	conserved hypothetical protein [Schistosoma mansoni]	2.3e-29	NP_001137544	>gi|221316645|ref|NP_001137544.1| UBA domain containing 2 isoform 1 [Homo sapiens]	Q2_P18354
30691	362	6	Q2_P18355	NO	C800537.1	SJCHGC03794 protein [Schistosoma japonicum] ||exocyst complex component 7 [Gallus gallus] emb|CAG32410.1| hypothetical protein [Gallus gallus] ||PREDICTED: similar to exocyst complex component 7 isoform a [Strongylocentrotus purpuratus] ||exocyst complex component 7 [Xenopus tropicalis] ||exocyst complex component 7 isoform b [Homo sapiens] ||	GGGGATGGTTCAATAACTGAAGATACAGAACAAATGGAGGATATTCCAAATAATATGTTG	0	C800537.1	Smp_136580			Plus / Plus	Plus / Plus	Sense	CAZ30340.1	exocyst complex protein exo70, putative [Schistosoma mansoni]	4.1e-48	NP_001138770	>gi|223718050|ref|NP_001138770.1| exocyst complex component 7 isoform 5 [Homo sapiens]	Q2_P18355,Q2_P06206,Q2_P34138,Q2_P19712
35110	414	5	Q2_P18356	NO	C800538.1	SJCHGC02219 protein [Schistosoma japonicum] ||SJCHGC02218 protein [Schistosoma japonicum] ||unnamed protein product [Tetraodon nigroviridis] ||PREDICTED: similar to ubiquitin specific protease 45 [Danio rerio] ||PREDICTED: similar to Ubiquitin specific protease 16 [Rattus norvegicus] ||	TTGTTGTTGTGGTACTGTTCGTCCTAAATTTGAACCATTTCTGGACCTTTCACTGTCTGT	0	C800538.1	Smp_074200.1			Plus / Plus	Plus / Plus	Sense	CAZ34831.1	ubiquitin-specific peptidase 16 (C19 family) [Schistosoma mansoni]	1.1e-42	NP_006438	>gi|5454156|ref|NP_006438.1| ubiquitin specific protease 16 isoform a [Homo sapiens]	Q2_P18356
1160	14	55	Q2_P00169	NO	C800539.1	SJCHGC06109 protein [Schistosoma japonicum] ||hypothetical protein LOC496750 [Xenopus tropicalis] gb|AAH88015.1| Hypothetical LOC496750 [Xenopus tropicalis] ||MGC64464 protein [Xenopus laevis] ||unnamed protein product [Tetraodon nigroviridis] ||	CGCCGCTACTTTTTTGGGTGACCCCCCGCCTTTTACTTTGGAAGGGGTTTTTAACTTTTC	0	C800539.1	Smp_089220			Plus / Minus	Plus / Minus	Sense	CAZ36198.1	expressed protein [Schistosoma mansoni]	3.7e-27	NP_057117	>gi|116875831|ref|NP_057117.2| regulator of microtubule dynamics 1 [Homo sapiens]
14649	173	29	Q2_P18357	NO	C800540.1	cyclin-dependent kinase 10 isoform 1 [Mus musculus] dbj|BAE26074.1| unnamed protein product [Mus musculus] ||unnamed protein product [Mus musculus] ||PREDICTED: similar to Cell division protein kinase 10 (Serine/threonine-protein kinase PISSLRE) [Canis familiaris] ||PISSLRE [Homo sapiens] emb|CAB37619.1| cyclin-dependent kinase [Homo sapiens] sp|Q15131|CDK10_HUMAN Cell division protein kinase 10 …	TGCTAATCCAGCTCAAGATCAAACTGCTGGATTATTTGATGCTGCCTTCGATAGAATTGT	0	C800540.1	Smp_103950			Plus / Plus	Plus / Plus	Sense	CAZ37442.1	serine/threonine kinase [Schistosoma mansoni]	6e-138	NP_443714	>gi|148596926|ref|NP_443714.3| cyclin-dependent kinase 10 isoform a [Homo sapiens]	Q2_P18357,Q2_P06172,Q2_P25748
22068	260	53	Q2_P18358	NO	C800541.1	none	GCTCATCATGTGATAGCCGAATTAATCACAAATATTGCTCATATGTCTCATGTTGGTTAT	0	C800541.1	Smp_033600			Plus / Plus	Plus / Plus	Sense	CAZ31035.1	ribonuclease III, putative [Schistosoma mansoni]				Q2_P18358,Q2_P22155,Q2_P23101,Q2_P03775,Q2_P02954
42414	499	84	Q2_P18359	NO	C800542.1	tubulin gamma complex associated protein 2 [Mus musculus] gb|AAH12519.1| Tubulin gamma complex associated protein 2 [Mus musculus] gb|AAH25582.1| Tubulin gamma complex associated protein 2 [Mus musculus] sp|Q921G8|GCP2_MOUSE Gamma-tubulin complex component 2 (GCP-2) ||unnamed protein product [Mus musculus] ||unnamed protein product [Mus musculus] ||hypothetical protein [Pongo pygmaeus] ||PREDICTE…	GAGCATTCAGTGTTTCTTGGTAAAACTGATCAAGCTCATATGTATGCAAGCAGTTTATTA	0	C800542.1	Smp_125530			Plus / Plus	Plus / Plus	Sense	CAZ28324.1	gamma-tubulin complex component 2 (gcp-2), putative [Schistosoma mansoni]	3.3e-42	NP_006650	>gi|5729840|ref|NP_006650.1| tubulin, gamma complex associated protein 2 [Homo sapiens]	Q2_P18359,Q2_P16961,Q2_P22753,Q2_P35437,Q2_P15494,Q2_P32172,Q2_P12366,Q2_P12739,Q2_P31225,Q2_P11442,Q2_P11885,Q2_P31697,Q2_P29147,Q2_P09403,Q2_P06769,Q2_P37310,Q2_P03454
13439	159	9	Q2_P00171	NO	C800543.1	SJCHGC06725 protein [Schistosoma japonicum] ||hypothetical protein LOC496664 [Xenopus tropicalis] gb|AAH87792.1| Hypothetical LOC496664 [Xenopus tropicalis] ||Hematopoietic stem/progenitor cells 176 [Homo sapiens] gb|AAF00568.1| unknown [Homo sapiens] ref|NP_057293.1| hematopoietic stem/progenitor cells 176 [Homo sapiens] ||PREDICTED: similar to hypothetical protein 2-6 [Rattus norvegicus] ||PRED…	CTTCACATCGATTTGATCAATGTATTTCTTCACTTCTAGCTACAAATGCTAGTTCTGGTT	0	C800543.1	Smp_091740.2			Plus / Minus	Plus / Minus	Sense	CAZ36425.1	expressed protein [Schistosoma mansoni]	4.7e-28	NP_057293	>gi|7706429|ref|NP_057293.1| trafficking protein particle complex 2-like [Homo sapiens]	Q2_P18536,Q2_P00171
40821	481	21	Q2_P18360	NO	C800544.1	SJCHGC04890 protein [Schistosoma japonicum] ||	GATGAAAATGATTATTATCTGAAAAATGATCCATCAGCGCCGGAATTCCGTCAACAATTA	0	C800544.1	Smp_123620			Plus / Plus	Plus / Plus	Sense	CAZ27970.1	C85 protease (C85 family) [Schistosoma mansoni]	1.9e-24	NP_056022	>gi|149192871|ref|NP_056022.1| OTU domain containing 3 [Homo sapiens]	Q2_P23885,Q2_P18360
42143	496	68	Q2_P18361	NO	C800545.1	similar to GenBank Accession Number BC013428 PP1201 protein in Homo sapiens [Schistosoma japonicum] ||SJCHGC09561 protein [Schistosoma japonicum] ||PREDICTED: similar to GRINA protein [Pan troglodytes] ||Unknown (protein for MGC:103666) [Danio rerio] ||Glutamate receptor ionotropic N-methyl D-asparate-associated protein 1 [Homo sapiens] ||	GTTGTCATGCTTACTGGGATTGCAATTATGATTGTATACTTTGTTTTGGGACCAAATAAG	0	C800545.1	Smp_181470			Plus / Plus	Plus / Plus	Sense	CAZ37623.1	recs1 protein (responsive to centrifugal force and shear stressprotein 1 protein), putative [Schistosoma mansoni]	3.6e-53	NP_071435	>gi|50593008|ref|NP_071435.2| transmembrane BAX inhibitor motif containing 1 [Homo sapiens]	Q2_P18361,Q2_P27489,Q2_P37601,Q2_P17235,Q2_P38858
44943	529	63	Q2_P18362	NO	C800546.1	SJCHGC07315 protein [Schistosoma japonicum] ||soc-2 (suppressor of clear) homolog [Mus musculus] gb|AAH83060.1| Soc-2 (suppressor of clear) homolog [Mus musculus] gb|AAH49775.1| Soc-2 (suppressor of clear) homolog [Mus musculus] dbj|BAE27179.1| unnamed protein product [Mus musculus] dbj|BAC37016.1| unnamed protein product [Mus musculus] sp|O88520|SHOC2_MOUSE Leucine-rich repeat protein SHOC-2 (Ra…	GGTACAAGAGAATTCATTAAGTGATCTACCAGAAACATTAGCACAATGTACACAATTACG	0	C800546.1	Smp_129120			Plus / Plus	Plus / Plus	Sense	CAZ28999.1	shoc2, putative [Schistosoma mansoni]	2e-133	NP_031399	>gi|41281398|ref|NP_031399.2| soc-2 suppressor of clear homolog [Homo sapiens]	Q2_P18362,Q2_P01217,Q2_P40304,Q2_P11414,Q2_P31198,Q2_P19969
11718	138	73	Q2_P18363	NO	C800547.1	SJCHGC03928 protein [Schistosoma japonicum] ||	ATGTATGTTTTAGTTGCGGTCCAAAACATATGCGACCGCCGAATCAATGATCTAGATGAA	0	C800547.1	Smp_049630			Plus / Plus	Plus / Plus	Sense	CAZ32507.1	ing-related [Schistosoma mansoni]				Q2_P18363,Q2_P14163,Q2_P34036
35253	415	63	Q2_P18364	NO	C800548.1	SJCHGC06682 protein [Schistosoma japonicum] ||Hypothetical protein CBG20899 [Caenorhabditis briggsae] ||CG13929-PA isoform A [Drosophila melanogaster] ref|NP_728647.2| CG13929-PA isoform A [Drosophila melanogaster] ||hypothetical protein LOC550601 [Danio rerio] gb|AAH92943.1| Hypothetical protein LOC550601 [Danio rerio] ||GA12634-PA [Drosophila pseudoobscura] ||	AGCTACTGCTCACTTTTTATGTTTAGAACGAATTGAGATCCTTGCTCATGAATACTGGGA	0	C800548.1	Smp_037930			Plus / Plus	Plus / Plus	Sense	CAZ31385.1	methyltransferase-related [Schistosoma mansoni]	1.9e-61	NP_859076	>gi|165932358|ref|NP_859076.3| methyltransferase like 2A [Homo sapiens]	Q2_P24761,Q2_P18364
36482	430	17	Q2_P00172	NO	C800549.1	SJCHGC01179 protein [Schistosoma japonicum] ||unknown [Schistosoma japonicum] ||	CGAGATGAAAATATCTACAAAAGTTCTTATTGTCGTACGTTAGTCGAGTCACTTGATACT	0	C800549.1	Smp_006590			Plus / Minus	Plus / Minus	Sense	CAZ28369.1	expressed protein [Schistosoma mansoni]				Q2_P39854,Q2_P29907,Q2_P10144,Q2_P00172
35539	419	9	Q2_P18365	NO	C800550.1	SJCHGC04418 protein [Schistosoma japonicum] ||mitochondrial ribosomal protein S10 [Homo sapiens] emb|CAD92529.1| MRPS10 [Homo sapiens] gb|AAH12560.1| Mitochondrial ribosomal protein S10 [Homo sapiens] gb|AAG39291.1| MSTP040 [Homo sapiens] sp|P82664|RT10_HUMAN Mitochondrial 28S ribosomal protein S10 (S10mt) (MRP-S10) ||PREDICTED: similar to mitochondrial ribosomal protein S10 partial [Bos taurus] …	CCTTCCGGAGCATTTATAAGTCGCTGGGGATTCTCAAAAGTATTTGAATTATAGAATATA	0	C800550.1	Smp_099300			Plus / Plus	Plus / Plus	Sense	CAZ37004.1	Mitochondrial 28S ribosomal protein S10 (S10mt) (MRP-S10), putative [Schistosoma mansoni]	1e-28	NP_060611	>gi|16554607|ref|NP_060611.2| mitochondrial ribosomal protein S10 [Homo sapiens]	Q2_P18365,Q2_P09742,Q2_P29480
24736	292	1	Q2_P18366	NO	C800551.1	SJCHGC05178 protein [Schistosoma japonicum] ||PREDICTED: similar to CG15525-PA [Apis mellifera] ||PREDICTED: similar to coiled-coil domain containing 12 [Canis familiaris] ||unnamed protein product [Tetraodon nigroviridis] ||PREDICTED: similar to coiled-coil domain containing 12 [Bos taurus] ||	CAAGTGTCGATTCCACTGAGACATATGCAAACCATTCGAAATCAATTGAATGATGAATTA	0	C800551.1	Smp_080110			Plus / Plus	Plus / Plus	Sense	CAZ35355.1	pre-mRNA splicing factor, putative [Schistosoma mansoni]	1.2e-29	NP_653317	>gi|238231397|ref|NP_653317.2| coiled-coil domain containing 12 [Homo sapiens]	Q2_P06233,Q2_P18366
2447	29	67	Q2_P18367	NO	C800552.1	SJCHGC02500 protein [Schistosoma japonicum] ||SJCHGC02501 protein [Schistosoma japonicum] ||PREDICTED: similar to ENSANGP00000007768 [Apis mellifera] ||ENSANGP00000007768 [Anopheles gambiae str. PEST] ref|XP_320933.2| ENSANGP00000007768 [Anopheles gambiae str. PEST] ||GA12826-PA [Drosophila pseudoobscura] ||	TAAGCAATAGTATCTGTTCTGTATGGGGGTGACATTGGTGTCGATATATTCCAAGTGTTT	0	C800552.1	Smp_081510			Plus / Plus	Plus / Plus	Sense	CAZ35483.1	hyvh1 dual specificity phosphatase, putative [Schistosoma mansoni]	4.6e-26	NP_009171	>gi|6005956|ref|NP_009171.1| dual specificity phosphatase 12 [Homo sapiens]
44349	522	64	Q2_P18368	NO	C800553.1	SJCHGC07447 protein [Schistosoma japonicum] ||protoscolex specific coiled-coil protein [Echinococcus multilocularis] ||ENSANGP00000020914 [Anopheles gambiae str. PEST] ref|XP_321839.2| ENSANGP00000020914 [Anopheles gambiae str. PEST] ||unnamed protein product [Homo sapiens] ref|NP_997194.1| hypothetical protein LOC92558 [Homo sapiens] ||PREDICTED: similar to CG32137-PB isoform B [Bos taurus] ||	TTGAAGCACAAATCTTCTATGCAAGAACATGTTCAGTCAATCGAGTCTTTGAGACAAGAA	0	C800553.1	Smp_059780			Plus / Plus	Plus / Plus	Sense	CAZ33515.1	RAB6-interacting protein 2 (ERC protein 1), putative [Schistosoma mansoni]				Q2_P18368,Q2_P25480,Q2_P08792,Q2_P28501
45118	531	68	Q2_P18369	NO	C800554.1	SJCHGC03188 protein [Schistosoma japonicum] ||unnamed protein product [Tetraodon nigroviridis] ||regulator of G-protein signalling 12 isoform 5 [Homo sapiens] gb|AAL69960.1| RGS12TS isoform 2 [Homo sapiens] ||RGS12TS isoform [Homo sapiens] ||RGS12 protein [Homo sapiens] ||	CAGGCTGTGTATTGGTGCCTACTGATTTTAAGTCATGTACTGAAGAACTATCAATTCTAA	0	C800554.1	Smp_127520			Plus / Plus	Plus / Plus	Sense	CAZ28702.1	regulator of G protein signaling, putative [Schistosoma mansoni]				Q2_P18369,Q2_P19188,Q2_P27621,Q2_P29519,Q2_P30662,Q2_P07584,Q2_P10866
34195	403	25	Q2_P18370	NO	C800555.1	PREDICTED: similar to Putative pre-mRNA splicing factor RNA helicase (DEAH box protein 15) (ATP-dependent RNA helicase #46) isoform 1 [Strongylocentrotus purpuratus] ||PREDICTED: similar to Putative pre-mRNA splicing factor RNA helicase (DEAH box protein 15) (ATP-dependent RNA helicase #46) isoform 7 [Strongylocentrotus purpuratus] ||PREDICTED: similar to Putative pre-mRNA splicing factor RNA hel…	TGACGGGACAAGAGGAGATTGAAGAAGCATGCAAACGTATCCAGAGAGAAGTAGATGGTT	0	C800555.1	Smp_169650			Plus / Plus	Plus / Plus	Sense	CAY17421.1	ATP-dependent RNA Helicase, putative [Schistosoma mansoni]	0.0	NP_001349	>gi|68509926|ref|NP_001349.2| DEAH (Asp-Glu-Ala-His) box polypeptide 15 [Homo sapiens]	Q2_P21737,Q2_P02646,Q2_P18370
10257	121	57	Q2_P18371	NO	C800556.1	SJCHGC06505 protein [Schistosoma japonicum] ||Zgc:101635 [Danio rerio] ref|NP_001004637.1| hypothetical protein LOC447899 [Danio rerio] ||	GCTAATCTTCGATATCAAGCCTGGTACTGCAGATATTGAATTTAATGATAAATGGACGTT	0	C800556.1	Smp_132240			Plus / Plus	Plus / Plus	Sense	CAZ29510.1	expressed protein [Schistosoma mansoni]				Q2_P16597,Q2_P24322,Q2_P18371,Q2_P36898
44063	519	33	Q2_P18372	NO	C800557.1	SJCHGC09165 protein [Schistosoma japonicum] ||	GATCGTATCAATTGTCGATGTCTAGGCATTGCTGATGTTGAACGTTATGGATATAGCAAA	0	C800557.1	Smp_065370.2			Plus / Plus	Plus / Plus	Sense	CAZ34022.1	expressed protein [Schistosoma mansoni]				Q2_P18372,Q2_P00841
29185	344	30	Q2_P18373	NO	C800558.1	none	TGAACCACCAATATTTCTTCGTGAATTACATACTTCTGGAAATTTTCGCCATGAACCTAA	0	C800558.1	Smp_149270			Plus / Plus	Plus / Plus	Sense	CAZ32608.1	expressed protein [Schistosoma mansoni]				Q2_P00173,Q2_P39301,Q2_P11231,Q2_P18373
30453	359	23	Q2_P18374	NO	C800559.1	Ftz-F1 interacting protein [Schistosoma mansoni] ||SJCHGC08125 protein [Schistosoma japonicum] ||	TACAACACGTTCAATCACAACTCCTGTGACGAAACCTGTCATGTCAGTTCCTCATTCTAC	0	C800559.1	Smp_090140.2			Plus / Plus	Plus / Plus	Sense	CAZ36275.1	Ftz-F1 interacting protein, putative [Schistosoma mansoni]				Q2_P03420,Q2_P18374,Q2_P25142,Q2_P21005,Q2_P02030
20691	244	36	Q2_P18375	NO	C800560.1	SJCHGC01645 protein [Schistosoma japonicum] ||novel protein similar to vertebrate ectonucleotide pyrophosphatase\/phosphodiesterase 5 (putative function) (ENPP5) [Danio rerio] emb|CAI11937.1| novel protein similar to vertebrate ectonucleotide pyrophosphatase\/phosphodiesterase 5 (putative function) (ENPP5) [Danio rerio] ||unnamed protein product [Tetraodon nigroviridis] ||PREDICTED: similar to ec…	GCATCGTAAGGAAACCAATGAACCATTCATTCGTTTACCCATTGATAATGATAAAGAGTT	0	C800560.1	Smp_104270			Plus / Plus	Plus / Plus	Sense	CAY18084.1	ectonucleotide pyrophosphatase/phosphodiesterase, putative [Schistosoma mansoni]	1.4e-70	NP_067547	>gi|11034849|ref|NP_067547.1| ectonucleotide pyrophosphatase/phosphodiesterase 5 (putative function) [Homo sapiens]	Q2_P35711,Q2_P18375
31189	367	79	Q2_P18376	NO	C800561.1	ENSANGP00000010464 [Anopheles gambiae str. PEST] ref|XP_313298.2| ENSANGP00000010464 [Anopheles gambiae str. PEST] ||PREDICTED: similar to beta-1 4-mannosyltransferase isoform 2 [Canis familiaris] ||PREDICTED: similar to ENSANGP00000010464 [Apis mellifera] ||unnamed protein product [Tetraodon nigroviridis] ||Beta-1 4-mannosyltransferase [Danio rerio] ref|NP_956161.1| beta-1 4-mannosyltransferase …	GCCAGTGTATGAAAAAGCAATTCATACTAACCCCTGTAAAAACAAAGATAATTAGACGGT	0	C800561.1	Smp_005010			Plus / Plus	Plus / Plus	Sense	CAZ28194.1	chitobiosyldiphosphodolichol alpha-mannosyltransferase [Schistosoma mansoni]	8.5e-66	NP_061982	>gi|41350216|ref|NP_061982.3| beta-1,4-mannosyltransferase [Homo sapiens]	Q2_P18376
42428	500	13	Q2_P18377	NO	C800562.1	none	GTAAAATCGTGTCGACTAATACTCGATTCAAGAGACCTTTCCCAGTGAATCTGGAAAAAA	0	C800562.1	Smp_069220.1			Plus / Plus	Plus / Plus	Sense	CAZ34376.1	es2 protein, putative [Schistosoma mansoni]	7.7e-22	NP_073210	>gi|13027630|ref|NP_073210.1| DiGeorge syndrome critical region protein 14 [Homo sapiens]	Q2_P18377,Q2_P00174
2469	30	4	Q2_P00175	NO	C800563.1	SJCHGC04987 protein [Schistosoma japonicum] ||PREDICTED: similar to Probable ATP-dependent helicase DHX35 (DEAH-box protein 35) [Rattus norvegicus] ||PREDICTED: similar to Probable ATP-dependent helicase DHX35 (DEAH-box protein 35) [Bos taurus] ||hypothetical protein [Pongo pygmaeus] sp|Q5RBD4|DHX35_PONPY Probable ATP-dependent helicase DHX35 (DEAH-box protein 35) ||PREDICTED: similar to Probable…	GCTGGAATTAGCTCCACATTATTATCAATTCGGTACAGATAGAGAACATTTAGAACATTC	0	C800563.1	Smp_093580			Plus / Minus	Plus / Minus	Sense	CAY17623.1	ATP-dependent RNA Helicase, putative [Schistosoma mansoni]	5e-148	NP_068750	>gi|20544129|ref|NP_068750.2| DEAH (Asp-Glu-Ala-His) box polypeptide 35 [Homo sapiens]	Q2_P18400,Q2_P00180,Q2_P07946,Q2_P31238,Q2_P29706,Q2_P00175
25881	305	41	Q2_P18378	NO	C800564.1	SJCHGC02523 protein [Schistosoma japonicum] ||membrane glycoprotein ||rBAT protein [Oryctolagus cuniculus] prf||2102271A Na-independent AA transporter ||solute carrier family 3 member 1 [Rattus norvegicus] gb|AAA73144.1| unknown [Rattus norvegicus] gb|AAH78852.1| Solute carrier family 3 member 1 [Rattus norvegicus] sp|Q64319|SLC31_RAT Neutral and basic amino acid transport protein rBAT (B(0 +)-ty…	CTATCAGCGATTACTTTTTCAACTTACGGAACTTTATCTGTTGTAGTACTGAATGCTTTC	0	C800564.1	Smp_037540.2			Plus / Plus	Plus / Plus	Sense	CAZ31342.1	alpha-amylase, putative [Schistosoma mansoni]	8.6e-27	NP_000332	>gi|187423904|ref|NP_000332.2| solute carrier family 3, member 1 [Homo sapiens]
10313	122	28	Q2_P18379	NO	C800565.1	SJCHGC07340 protein [Schistosoma japonicum] ||	ATCAGTAATAATGATGATTGGATCGAATTGGATAAGAATATATGCATTCGTGGTCTTCCC	0	C800565.1	Smp_037460.2			Plus / Plus	Plus / Plus	Sense	CAZ31335.1	expressed protein [Schistosoma mansoni]				Q2_P32087,Q2_P21187,Q2_P18379,Q2_P23822,Q2_P29597,Q2_P04315,Q2_P09863
24757	292	22	Q2_P18380	NO	C800566.1	SJCHGC08292 protein [Schistosoma japonicum] ||MAF1 protein [Homo sapiens] gb|AAH31273.1| MAF1 protein [Homo sapiens] gb|AAH14082.1| MAF1 protein [Homo sapiens] emb|CAB66871.1| hypothetical protein [Homo sapiens] emb|CAG38494.1| MAF1 [Homo sapiens] gb|AAH18714.1| MAF1 protein [Homo sapiens] sp|Q9H063|MAF1_HUMAN Repressor of RNA polymerase III transcription MAF1 homolog ||unnamed protein product [M…	CAATCACCTATAAGCAGAGATACACGTACAGTTTATTATGCGTACTCGTAAGCAAATTAT	0	C800566.1	Smp_070680			Plus / Plus	Plus / Plus	Sense	CAZ34501.1	expressed protein [Schistosoma mansoni]	8.3e-27	NP_115648	>gi|110349740|ref|NP_115648.2| MAF1 protein [Homo sapiens]
8412	99	82	Q2_P18381	NO	C800567.1	similar to XM_028438 CGI-101 protein in Homo sapiens [Schistosoma japonicum] ||PREDICTED: similar to carcinoma related gene [Strongylocentrotus purpuratus] ||PREDICTED: similar to carcinoma related gene [Strongylocentrotus purpuratus] ||PREDICTED: similar to ENSANGP00000001887 [Apis mellifera] ||hypothetical protein LOC548851 [Xenopus tropicalis] ||	GTAAATGTTCGTTAAGACTGCCTTAAACTTTCGAGATTATCTAATCGCATTGTTGCTACT	0	C800567.1	Smp_019880			Plus / Plus	Plus / Plus	Sense	CAZ29670.1	der1-like protein, derlin [Schistosoma mansoni]	2.9e-67	NP_057125	>gi|31455614|ref|NP_057125.2| Der1-like domain family, member 2 [Homo sapiens]
17490	206	65	Q2_P18382	NO	C800568.1	amino acid permease ||SJCHGC06643 protein [Schistosoma japonicum] ||CG3297-PB isoform B [Drosophila melanogaster] ref|NP_730005.2| CG3297-PB isoform B [Drosophila melanogaster] ||CG3297-PC isoform C [Drosophila melanogaster] gb|AAF49688.1| CG3297-PA isoform A [Drosophila melanogaster] ref|NP_730006.1| CG3297-PC isoform C [Drosophila melanogaster] ref|NP_524074.1| CG3297-PA isoform A [Drosophila m…	AAATCACCCGGTGAACTTGCATTGGGGTTTTACCAAGGGTTTTGGGCTTTCTCTGGTTGG	0	C800568.1	Smp_083990.1			Plus / Plus	Plus / Plus	Sense	CAZ35740.1	cationic amino acid transporter, putative [Schistosoma mansoni]	8.5e-88	NP_003477	>gi|71979932|ref|NP_003477.4| solute carrier family 7 (cationic amino acid transporter, y+ system), member 5 [Homo sapiens]	Q2_P17985,Q2_P06601,Q2_P18382,Q2_P00040
38191	450	26	Q2_P18383	NO	C800569.1	none	GATTGTGGCCAGAAGTAGAATTGTTGTGTCTAATTGGAAGATAGTTTTTGTGAAATCACT	0	C800569.1	Smp_174880			Plus / Plus	Plus / Plus	Sense	CAZ36737.1	FOG precursor, putative [Schistosoma mansoni]	4.7e-24	NP_659457	>gi|94721321|ref|NP_659457.2| coiled-coil domain containing 11 [Homo sapiens]
36112	425	72	Q2_P18384	NO	C800570.1	SJCHGC05881 protein [Schistosoma japonicum] ||Hypothetical protein C34E10.10 [Caenorhabditis elegans] ref|NP_498110.1| C34E10.10 [Caenorhabditis elegans] ||PREDICTED: similar to CG17652-PA [Apis mellifera] ||GA14597-PA [Drosophila pseudoobscura] ||CG17652-PA [Drosophila melanogaster] ref|NP_608617.1| CG17652-PA [Drosophila melanogaster] ||	ATACACGTAGGAAGAAGACTAAAGGACCCAATCCACTATCGTGTAAGCAAAAATTACACA	0	C800570.1	Smp_012540			Plus / Plus	Plus / Plus	Sense	CAZ28947.1	expressed protein [Schistosoma mansoni]				Q2_P18384,Q2_P29772,Q2_P10014
29373	346	48	Q2_P00177	NO	C800571.1	none	CGTTCAATACTTTGACAGTAATCGGTTGCAATTTCATTCCTCTTTTGAATAACCATTCGA	0	C800571.1	Smp_126160			Plus / Minus	Plus / Minus	Sense	CAZ28451.1	poly(p)/ATP NAD kinase, putative [Schistosoma mansoni]	2.4e-48	NP_001078880	>gi|146134341|ref|NP_001078880.1| hypothetical protein LOC133686 isoform 1 [Homo sapiens]	Q2_P18385,Q2_P00177,Q2_P32989,Q2_P13139,Q2_P22128,Q2_P25925,Q2_P30687,Q2_P10891,Q2_P08612,Q2_P28319,Q2_P02941
28058	331	8	Q2_P18386	NO	C800572.1	GA10904-PA [Drosophila pseudoobscura] ||CG11306-PA [Drosophila melanogaster] gb|AAM29441.1| RE27026p [Drosophila melanogaster] ref|NP_649340.1| CG11306-PA [Drosophila melanogaster] gb|AAL28560.1| HL02815p [Drosophila melanogaster] ||PREDICTED: similar to Hypothetical protein MGC76133 [Gallus gallus] ||KIAA0266 protein [Homo sapiens] ||PREDICTED: similar to CG11306-PA [Bos taurus] ||	TCGTTGTGGGGTGGAAAACCTGTTGTGCTTTATCCTCCATGTCCTGTCGAGGATTTGGAA	0	C800572.1	Smp_052330			Plus / Plus	Plus / Plus	Sense	CAZ32771.1	glycosyltransferase [Schistosoma mansoni]	2.5e-87	NP_001004127	>gi|51889724|ref|NP_001004127.1| asparagine-linked glycosylation 11 [Homo sapiens]	Q2_P18386,Q2_P35518
24202	285	62	Q2_P18387	NO	C800574.1	PREDICTED: similar to TatD DNase domain containing 1 [Canis familiaris] ||Tatdn1 protein [Mus musculus] ||LOC494648 protein [Xenopus laevis] ||TatD DNase domain containing 1 [Homo sapiens] gb|AAK14933.1| CDA11 [Homo sapiens] ||TatD DNase domain containing 1 [Homo sapiens] ||	CTGTGAAAGGAGTAAGCGAAGAAGAACTAGCTGAAGTAACATATCGAAATTCAATTGATT	0	C800574.1	Smp_000810.1			Plus / Plus	Plus / Plus	Sense	CAZ27781.1	similar to TatD DNase domain containing 1 [Schistosoma mansoni]	1.3e-81	NP_114415	>gi|14042943|ref|NP_114415.1| TatD DNase domain containing 1 isoform a [Homo sapiens]	Q2_P18387
9377	111	27	Q2_P18388	NO	C800575.1	PREDICTED: similar to kinesin 2 60/70kDa isoform 1 isoform 6 [Canis familiaris] ||kinesin light chain isoform 3 - sea urchin (Strongylocentrotus purpuratus) ||kinesin light chain isoform 4 [Strongylocentrotus purpuratus] pir||S33816 kinesin light chain isoform 4 - sea urchin (Strongylocentrotus purpuratus) gb|AAA03060.1| kinesin light chain isoform 4 ||kinesin light chain isoform 3 [Strongylocent…	CTCTGTTAAAATCAGTTTTAACACCAGATCATGGTTATGCTTCAATACAGCAAAGAAGTC	0	C800575.1	Smp_139760			Plus / Plus	Plus / Plus	Sense	CAZ30918.1	kinesin-like protein [Schistosoma mansoni]	4.9e-65	NP_005543	>gi|33620730|ref|NP_005543.2| kinesin light chain 1 isoform 1 [Homo sapiens]	Q2_P12899,Q2_P18388,Q2_P19164,Q2_P00745,Q2_P12986,Q2_P07340,Q2_P08757,Q2_P28466,Q2_P08936,Q2_P28646,Q2_P27027,Q2_P32825
9063	107	53	Q2_P18389	NO	C800576.1	SJCHGC07924 protein [Schistosoma japonicum] ||	ATATATGTCTCCATACAACGCCATTATAACCACTAGAAATAAACTCAGTCAGTTGTTGCC	0	C800576.1	Smp_006230			Plus / Plus	Plus / Plus	Sense	CAZ28327.1	membralin, putative [Schistosoma mansoni]	1.5e-49	NP_001028198	>gi|74229025|ref|NP_001028198.1| membralin isoform 1 [Homo sapiens]	Q2_P18389,Q2_P38208,Q2_P15427,Q2_P35364
40064	472	29	Q2_P18390	NO	C800577.1	SJCHGC05044 protein [Schistosoma japonicum] ||general transcription factor II H polypeptide 4 [Xenopus tropicalis] ref|NP_001015845.1| MGC97849 protein [Xenopus tropicalis] gb|AAH90134.1| MGC97849 protein [Xenopus tropicalis] ||Unknown (protein for MGC:77721) [Danio rerio] ref|NP_956221.1| hypothetical protein LOC334839 [Danio rerio] ||MGC83106 protein [Xenopus laevis] ||general transcription fac…	CACCGTTCACTTTTCCTTTCCTACTCCAGATTATATGTACGTAAATAGTTACATTTTCAC	0	C800577.1	Smp_082790			Plus / Plus	Plus / Plus	Sense	CAZ35606.1	tfiih, polypeptide, putative [Schistosoma mansoni]	1e-105	NP_001508	>gi|4504201|ref|NP_001508.1| general transcription factor IIH, polypeptide 4, 52kDa [Homo sapiens]
28146	332	11	Q2_P18391	NO	C800578.1	SJCHGC06648 protein [Schistosoma japonicum] ||hypothetical protein CNBK0860 [Cryptococcus neoformans var. neoformans B-3501A] ||DnaJ [Mycoplasma gallisepticum R] gb|AAP56426.1| DnaJ [Mycoplasma gallisepticum R] ||COG0457: FOG: TPR repeat [Cytophaga hutchinsonii] ||DNAJ-like protein putative [Plasmodium chabaudi] emb|CAH74423.1| DNAJ-like protein putative [Plasmodium chabaudi] ||	CCCTAATATATCACGATCGATTTTCATTTCAACAACACTAATAGCAGTGTTCACCTACTT	0	C800578.1	Smp_005070.2			Plus / Plus	Plus / Plus	Sense	CAZ28201.1	chaperone protein DNAj, putative [Schistosoma mansoni]				Q2_P27751,Q2_P18391
19362	228	67	Q2_P18392	NO	C800579.1	SJCHGC05019 protein [Schistosoma japonicum] ||SJCHGC06551 protein [Schistosoma japonicum] ||SJCHGC05769 protein [Schistosoma japonicum] ||	AAAACTCTCGACAGTATGACAGTTGTTGTAAAACCAAGAAGTCATAGCTTATTCTCTTGT	0	C800579.1	Smp_144940			Plus / Plus	Plus / Plus	Sense	CAZ31771.1	expressed protein [Schistosoma mansoni]				Q2_P18392,Q2_P03997,Q2_P23367
12885	152	50	Q2_P18393	NO	C800580.1	SJCHGC07953 protein [Schistosoma japonicum] ||SPCC1259.12c [Schizosaccharomyces pombe] ref|NP_588068.1| hypothetical protein SPCC1259.12c [Schizosaccharomyces pombe 972h-] ||hypothetical protein DDB0184565 [Dictyostelium discoideum] gb|EAL61064.1| hypothetical protein DDB0184565 [Dictyostelium discoideum] ||PREDICTED: similar to RAN binding protein 10 [Danio rerio] ||PREDICTED: similar to Ran-bin…	CTTCTATCGATTCTTCTACTACGACCGATGAAAACAATGAGGTTACTGATAATAATGACT	0	C800580.1	Smp_161080			Plus / Plus	Plus / Plus	Sense	CAZ34594.1	ran binding protein 9-related [Schistosoma mansoni]	5.4e-31	NP_005484	>gi|39812378|ref|NP_005484.2| RAN binding protein 9 [Homo sapiens]	Q2_P18393,Q2_P15024,Q2_P34943,Q2_P33641,Q2_P07016,Q2_P14943,Q2_P34869,Q2_P26655,Q2_P13769
27537	324	82	Q2_P18394	NO	C800581.1	SJCHGC08381 protein [Schistosoma japonicum] ||SJCHGC08398 protein [Schistosoma japonicum] ||F26F24.20 [Arabidopsis thaliana] ref|NP_173747.1| expressed protein [Arabidopsis thaliana] ||putative esterase [Oryza sativa (japonica cultivar-group)] ref|XP_475225.1| putative esterase [Oryza sativa (japonica cultivar-group)] gb|AAT58849.1| unknown protein [Oryza sativa (japonica cultivar-group)] ||lipas…	CTCTACTCAAATCATCTCAGGAACAAGTACCTCTTGATTTTCAAAGATCACTTTATCGTA	0	C800581.1	Smp_037780			Plus / Plus	Plus / Plus	Sense	CAZ31370.1	hypothetical protein [Schistosoma mansoni]				Q2_P29295,Q2_P18394
22873	270	8	Q2_P18395	NO	C800582.1	SJCHGC05809 protein [Schistosoma japonicum] ||	GGCTTTATACGCTCCAGTTGGGGTTCTATCTACATTCATTATGGAGTGTATTTTTTATGG	0	C800582.1	Smp_122050			Plus / Plus	Plus / Plus	Sense	CAZ39134.1	(dihydro)ceramide Synthase (LAG1) [Schistosoma mansoni]	1.1e-25	NP_067090	>gi|11641421|ref|NP_067090.1| LAG1 homolog, ceramide synthase 1 isoform 1 [Homo sapiens]	Q2_P18395
13015	154	10	Q2_P18396	NO	C800583.1	SJCHGC01198 protein [Schistosoma japonicum] ||H3 histone family 3A [Mus musculus] gb|AAX08979.1| H3 histone family 3A [Bos taurus] ref|NP_032237.1| H3 histone family 3B [Mus musculus] gb|AAI06178.1| Unknown (protein for MGC:118418) [Mus musculus] gb|AAI06303.1| Unknown (protein for MGC:130806) [Xenopus laevis] ref|XP_888203.1| PREDICTED: similar to H3 histone family 3B isoform 4 [Bos taurus] ref|…	CTGTTGGATTGGTCGAACTAATCGGTTTTCGTGATCTCTAAACTGTTTGAAATTACATAA	0	C800583.1	Smp_082240			Plus / Plus	Plus / Plus	Sense	CAZ35552.1	histone H3, putative [Schistosoma mansoni]	1.4e-71	NP_002098	>gi|4504279|ref|NP_002098.1| H3 histone, family 3A [Homo sapiens]	Q2_P18396,Q2_P21481,Q2_P18655,Q2_P17206,Q2_P25520,Q2_P05642,Q2_P06790,Q2_P23044,Q2_P40499,Q2_P38940,Q2_P04994,Q2_P10608,Q2_P30386,Q2_P03719
11872	140	57	Q2_P18397	NO	C800584.1	SJCHGC07148 protein [Schistosoma japonicum] ||ENSANGP00000013368 [Anopheles gambiae str. PEST] ref|XP_313615.1| ENSANGP00000013368 [Anopheles gambiae str. PEST] ||PREDICTED: similar to CGI-94 protein comparative gene identification transcript 94 [Gallus gallus] ||comparative gene identification transcript 94 (CGI-94) [Homo sapiens] gb|AAH05182.1| UTP11-like U3 small nucleolar ribonucleoprotein [H…	GGGATCGATGAACACTTGGATTTTGTTTAGTTATCTAATTTGTGCATTTCATTGTGCTTG	0	C800584.1	Smp_026190			Plus / Plus	Plus / Plus	Sense	CAZ30284.1	expressed protein [Schistosoma mansoni]	1.3e-23	NP_057121	>gi|156415994|ref|NP_057121.2| UTP11-like, U3 small nucleolar ribonucleoprotein [Homo sapiens]	Q2_P18397,Q2_P34031,Q2_P14159
7086	84	31	Q2_P00179	NO	C800586.1	PREDICTED: similar to CG4076-PA partial [Strongylocentrotus purpuratus] ||unnamed protein product [Tetraodon nigroviridis] ||Unknown (protein for IMAGE:6637633) [Xenopus laevis] ||nuclear fragile X mental retardation protein interacting protein [Mus musculus] gb|AAH56192.1| Nuclear fragile X mental retardation protein interacting protein [Mus musculus] dbj|BAE33625.1| unnamed protein product [Mus…	TGAAGCCAAAAAGAAGCTTATTGAAGAACGTATCGAGAGAGGAGAAATATTTGAGACACC	0	C800586.1	Smp_099560.2			Plus / Minus	Plus / Minus	Sense	CAY17881.1	expressed protein [Schistosoma mansoni]				Q2_P00179,Q2_P12418,Q2_P32213
22831	269	51	Q2_P18398	NO	C800587.1	SJCHGC05183 protein [Schistosoma japonicum] ||bestrophin 2 [Homo sapiens] ||vitelliform macular dystrophy 2-like protein 1 [Homo sapiens] sp|Q8NFU1|VMDL1_HUMAN Bestrophin-2 (Vitelliform macular dystrophy 2-like protein 1) ||vitelliform macular dystrophy 2-like protein 1 [Mus musculus] ||Vmd2l1-pending protein [Mus musculus] gb|AAH36163.1| Vmd2l1-pending protein [Mus musculus] sp|Q8BGM5|VMDL1_MOUS…	GGTGGTAGAGTTTTGGGAAAAGTTGTATAAATTGTGTATGTATGACTGGGTGAATGTACC	0	C800587.1	Smp_139080			Plus / Plus	Plus / Plus	Sense	CAZ30807.1	bestrophin-related [Schistosoma mansoni]	2.7e-71	NP_060152	>gi|119703742|ref|NP_060152.2| vitelliform macular dystrophy 2-like 1 [Homo sapiens]	Q2_P18398,Q2_P41650,Q2_P08789,Q2_P31998
23636	279	6	Q2_P18399	NO	C800588.1	RNA polymerase B transcription factor 3 [Schistosoma japonicum] ||PREDICTED: similar to RIKEN cDNA 5730434I03 gene [Rattus norvegicus] ||basic transcription factor 3-like 4 [Mus musculus] ref|NP_689478.1| transcription factor BTF3-like [Homo sapiens] ref|XP_859309.1| PREDICTED: similar to basic transcription factor 3-like 4 isoform 3 [Canis familiaris] ref|XP_532577.2| PREDICTED: similar to basic…	GTTCCCTTTACTAGTTGTGCATTGTCAAATCGTCCTGGTAATATTCATTTTGTTTGACAA	0	C800588.1	Smp_002180.1			Plus / Plus	Plus / Plus	Sense
17065	201	65	Q2_P18401	NO	C800590.1	none	GGGCAAATGATGTACAAGGTACTATTGGTAGATTACAAGATATAATACCACGTATGGATT	0	C800590.1	Smp_139850			Plus / Plus	Plus / Plus	Sense	CAZ30938.1	hypothetical protein [Schistosoma mansoni]				Q2_P18401,Q2_P00181,Q2_P07870,Q2_P14304,Q2_P27487,Q2_P34191
1494	18	49	Q2_P00182	NO	C800591.1	none	GGAGATGTACCAGTGTCACTTTTGGAAAAGTGTGGGATATCAGTATAAAATACCAAATAT	0	C800591.1	Smp_031590			Plus / Minus	Plus / Minus	Sense	CAY16869.1	expressed protein [Schistosoma mansoni]				Q2_P00182
14576	172	41	Q2_P00183	NO	C800592.1	SJCHGC05030 protein [Schistosoma japonicum] ||	GTTCTGAGAATGACACAACGAATAATGATCTTATGAGCAGGTTATCTGAATTGATGTGTT	0	C800592.1	Smp_025680			Plus / Minus	Plus / Minus	Sense	CAZ30238.1	conserved hypothetical protein [Schistosoma mansoni]				Q2_P00183
14632	173	12	Q2_P00184	NO	C800593.1	putative cytosol aminopeptidase [Schistosoma mansoni] ||his-tagged cytosolic leucine aminopeptidase [synthetic construct] ||cytosol aminopeptidase-like protein [Schistosoma japonicum] ||SJCHGC02048 protein [Schistosoma japonicum] ||unnamed protein product [Tetraodon nigroviridis] ||	CCAACTGCTGCTCCCTTATTGATGTTTGCAAGAAAATATATTTTACCACGATTAAGTTTC	0	C800593.1	Smp_030000			Plus / Minus	Plus / Minus	Sense	CAZ30678.1	leucine aminopeptidase (M17 family) [Schistosoma mansoni]				Q2_P00184,Q2_P19424,Q2_P20781,Q2_P01837,Q2_P28463,Q2_P29006,Q2_P09935,Q2_P29681,Q2_P16627,Q2_P09259,Q2_P08753
26019	307	9	Q2_P00185	NO	C800594.1	Smc3 protein [Xenopus laevis] ||structural maintenance of chromosomes protein 3 [Xenopus laevis] ||cohesin subunit SMC3 [Oryzias latipes] ||PREDICTED: chondroitin sulfate proteoglycan 6 (bamacan) [Pan troglodytes] ||cohesin complex subunit [Gallus gallus] ref|NP_989848.1| chondroitin sulfate proteoglycan 6 (bamacan) [Gallus gallus] ||	CCATCTCTTTAATGTCTGCCCTATTCAATATTCATCTTTATCTGTACTCTACACTTTGCA	0	C800594.1	Smp_134850			Plus / Minus	Plus / Minus	Sense	CAZ30019.1	Rootletin (Ciliary rootlet coiled-coil protein), putative [Schistosoma mansoni]	0.0	NP_005436	>gi|4885399|ref|NP_005436.1| structural maintenance of chromosomes 3 [Homo sapiens]
34474	406	49	Q2_P00186	NO	C800595.1	PREDICTED: similar to SCY1-like 1 isoform 6 [Bos taurus] ||PREDICTED: similar to SCY1-like 1 isoform 2 [Bos taurus] ||PREDICTED: similar to SCY1-like 1 isoform 5 [Bos taurus] ||PREDICTED: similar to SCY1-like 1 isoform 4 [Bos taurus] ||PREDICTED: similar to SCY1-like 1 isoform 1 [Bos taurus] ||	TGAATGGAAATTGGGCGCTTTAGATTTTGTCGGACCTGTTAATGAACCTCCACCGCCTAT	0	C800595.1	Smp_176440			Plus / Minus	Plus / Minus	Sense	CAZ36961.1	protein kinase [Schistosoma mansoni]	1e-101	NP_065731	>gi|115430241|ref|NP_065731.3| SCY1-like 1 isoform A [Homo sapiens]	Q2_P00186,Q2_P20431,Q2_P01567,Q2_P32013
33820	398	75	Q2_P18403	NO	C800596.1	SJCHGC06231 protein [Schistosoma japonicum] ||cathepsin L precursor [Sarcophaga peregrina] sp|Q26636|CATL_SARPE Cathepsin L precursor [Contains: Cathepsin L heavy chain Cathepsin L light chain] ||fibroinase precursor [Bombyx mori] ||cathepsin L-like protease [Helicoverpa armigera] ||CG6692-PC isoform C [Drosophila melanogaster] ref|NP_523735.2| CG6692-PC isoform C [Drosophila melanogaster] ||	GTGCGGCTTCATACCCTCTAGTATGAAATATTTGTTTGCAGATGTTAACATTTGAAGAAA	0	C800596.1	Smp_157090			Plus / Plus	Plus / Plus	Sense	CAZ33964.1	subfamily C1A unassigned peptidase (C01 family) [Schistosoma mansoni]	2.3e-81	NP_001903	>gi|4503155|ref|NP_001903.1| cathepsin L1 preproprotein [Homo sapiens]	Q2_P18403,Q2_P39202,Q2_P33634,Q2_P13764,Q2_P14415,Q2_P34307,Q2_P28229,Q2_P08523,Q2_P09848,Q2_P29582,Q2_P09481,Q2_P29219,Q2_P30915,Q2_P11130,Q2_P38413
32246	380	31	Q2_P18404	NO	C800597.1	SJCHGC02571 protein [Schistosoma japonicum] ||similar to NM_014189 adducin 1 (alpha) isoform b in Homo sapiens [Schistosoma japonicum] ||nervous system adducin [Aplysia californica] ||hypothetical protein [Gallus gallus] ||PREDICTED: similar to adducin 1 (alpha) isoform d erythrocyte adducin alpha subunit [Gallus gallus] ||	CTGTCAGTCCTGAGGCCATTGAACTACTATCAAATTATGGAGTTCGCTATCATGAGTACC	0	C800597.1	Smp_083040.1			Plus / Plus	Plus / Plus	Sense	CAZ35634.1	adducin related protein [Schistosoma mansoni]	2e-65	NP_001110	>gi|29826319|ref|NP_001110.2| adducin 1 (alpha) isoform a [Homo sapiens]	Q2_P18404,Q2_P06762,Q2_P31733,Q2_P11915,Q2_P31724,Q2_P16562,Q2_P36858,Q2_P11905,Q2_P37536
28204	332	69	Q2_P18406	NO	C800599.1	Chain A Crystal Structure Of Yeast Guanylate Kinase In Complex With Guanosine-5 -Monophosphate pdb|1EX6|B Chain B Crystal Structure Of Unliganded Form Of Guanylate Kinase From Yeast pdb|1EX6|A Chain A Crystal Structure Of Unliganded Form Of Guanylate Kinase From Yeast ||Guanylate kinase converts GMP to GDP required for growth and mannose outer chain elongation of cell wall N-linked glycoproteins …	CTCCCTGCTGTTAAATGTACTAAATGTGCGTTATAACTACGAATATATTTAGTGATCCAC	0	C800599.1	Smp_016880			Plus / Plus	Plus / Plus	Sense	CAZ29389.1	mannosidase, endo-alpha, putative [Schistosoma mansoni]	1e-87	NP_078917	>gi|41393556|ref|NP_078917.2| mannosidase, endo-alpha [Homo sapiens]	Q2_P18406,Q2_P37664,Q2_P35972
7693	91	43	Q2_P00188	NO	C800600.1	PREDICTED: similar to chromodomain helicase DNA binding protein 1 isoform 1 [Canis familiaris] ||chromodomain helicase DNA binding protein 1 [Gallus gallus] gb|AAC60282.1| chromo-helicase-DNA-binding on the Z chromosome protein [Gallus gallus] ||PREDICTED: similar to chromodomain helicase DNA binding protein 1 isoform 5 [Bos taurus] ||chromo-helicase DNA-binding protein [Taeniopygia guttata] ||PR…	AGAACTTCGACATGTCTACAGACATGCTGTGAAACGTCGATTAAAAGAACAAAGAAAAAA	0	C800600.1	Smp_041760			Plus / Minus	Plus / Minus	Sense	CAZ31764.1	chromodomain helicase DNA binding protein, putative [Schistosoma mansoni]	0.0	NP_001262	>gi|118421089|ref|NP_001262.3| chromodomain helicase DNA binding protein 2 isoform 1 [Homo sapiens]	Q2_P00188,Q2_P33333,Q2_P01824,Q2_P13783,Q2_P30260,Q2_P23901,Q2_P24415,Q2_P24923,Q2_P05179,Q2_P04862,Q2_P38477,Q2_P39613,Q2_P04393
36586	431	36	Q2_P18408	NO	C800602.1	SJCHGC09302 protein [Schistosoma japonicum] ||cell-cycle and apoptosis regulatory protein 1 [Homo sapiens] emb|CAH70221.1| novel protein (FLJ10590) [Homo sapiens] emb|CAH73835.1| novel protein (FLJ10590) [Homo sapiens] ||cell-cycle and apoptosis regulatory protein 1 [Homo sapiens] ||unnamed protein product [Homo sapiens] ||death inducer with SAP domain DIS [Homo sapiens] ||	AGTTCGTCGCCTCAGGCGTACTGTGAACCCAGCTCTGTTATTTGCGTTTACTTACTTTGA	0	C800602.1	Smp_056360.1			Plus / Plus	Plus / Plus	Sense	CAZ33158.1	P30 dbc protein, putative [Schistosoma mansoni]	6e-101	NP_060707	>gi|46852388|ref|NP_060707.2| cell-cycle and apoptosis regulatory protein 1 [Homo sapiens]	Q2_P18408,Q2_P32199,Q2_P00607,Q2_P16468,Q2_P10389,Q2_P10018,Q2_P28668,Q2_P32146
22807	269	27	Q2_P18412	NO	C800607.1	SJCHGC04975 protein [Schistosoma japonicum] ||hypothetical protein [Schistosoma japonicum] ||	CTTCACCGGTACAACAGAAACAGCCTACACGTGAAATAATATCAAGTAATTCAAACTCTG	0	C800607.1	Smp_074060			Plus / Plus	Plus / Plus	Sense	CAZ34816.1	hypothetical protein [Schistosoma mansoni]				Q2_P18412
27960	329	80	Q2_P00193	NO	C800609.1	SJCHGC09686 protein [Schistosoma japonicum] ||	CAGCAGCTAGTGACACTCTTAATGAGATTTTTGAATCTGCTTCAAAAATCTTCGGTTTAA	0	C800609.1	Smp_128070			Plus / Minus	Plus / Minus	Sense	CAZ28800.1	hypothetical protein [Schistosoma mansoni]				Q2_P00193
13173	155	83	Q2_P00194	NO	C800610.1	SJCHGC09435 protein [Schistosoma japonicum] ||	GAGATACAAATCCTCGAATACCGGCTACTAGCTCTGATAATTCCACTAAAAAATAATTGT	0	C800610.1	Smp_126260			Plus / Minus	Plus / Minus	Sense	CAZ28470.1	protein phosphatase-2b, putative [Schistosoma mansoni]	0.0	NP_001135826	>gi|215272354|ref|NP_001135826.1| protein phosphatase 3, catalytic subunit, beta isoform c [Homo sapiens]	Q2_P16846,Q2_P06267,Q2_P33433,Q2_P13577,Q2_P00194,Q2_P34101,Q2_P14218,Q2_P35603,Q2_P15610,Q2_P13102,Q2_P32949,Q2_P30357,Q2_P10579,Q2_P25858,Q2_P24371,Q2_P25797,Q2_P37184
10374	123	4	Q2_P18415	NO	C800612.1	SJCHGC04327 protein [Schistosoma japonicum] ||RE54461p [Drosophila melanogaster] gb|AAF51018.3| CG3054-PA isoform A [Drosophila melanogaster] ref|NP_722974.1| CG3054-PA isoform A [Drosophila melanogaster] ||CG3054-PB isoform B [Drosophila melanogaster] ref|NP_608829.1| CG3054-PB isoform B [Drosophila melanogaster] gb|AAK92879.1| GH12050p [Drosophila melanogaster] ||GA15894-PA [Drosophila pseudoob…	GCGATCGAAGAAAGGAAGGGTGTGATAAAAAGGAAGAGACATATTCAAATGATAAACTTT	0	C800612.1	Smp_159530			Plus / Plus	Plus / Plus	Sense	CAZ34351.1	conserved hypothetical protein [Schistosoma mansoni]				Q2_P11078,Q2_P18415
42077	496	2	Q2_P00196	NO	C800614.1	SJCHGC01871 protein [Schistosoma japonicum] ||unnamed protein product [Mus musculus] ||ectonucleoside triphosphate diphosphohydrolase 6 [Rattus norvegicus] emb|CAC16598.1| NTPDase6 [Rattus norvegicus] sp|Q9ER31|ENP6_RAT Ectonucleoside triphosphate diphosphohydrolase 6 (NTPDase6) (CD39 antigen-like 2) ||PREDICTED: similar to Ectonucleoside triphosphate diphosphohydrolase 6 (NTPDase6) (CD39 antigen…	GACTGGTTACATGATAACCGTTTAAAGCAACTCTTGCATATATGTCAGATTTTAAACCCT	0	C800614.1	Smp_081450			Plus / Minus	Plus / Minus	Sense	CAZ35478.1	adenosine diphosphatase, putative [Schistosoma mansoni]	1.4e-65	NP_001238	>gi|166235893|ref|NP_001238.2| ectonucleoside triphosphate diphosphohydrolase 6 isoform 1 [Homo sapiens]
6473	77	13	Q2_P18418	NO	C800617.1	SJCHGC02254 protein [Schistosoma japonicum] ||SJCHGC02255 protein [Schistosoma japonicum] ||	GAGGAAAATAATCCTGATCTGATTCAGCTAATAGATATTAGCGACAACACTGTTTCATCT	0	C800617.1	Smp_130580			Plus / Plus	Plus / Plus	Sense	CAZ29241.1	expressed protein [Schistosoma mansoni]				Q2_P18418,Q2_P33431
16973	200	58	Q2_P18419	NO	C800618.1	similar to GenBank Accession Number AE003799 CG5174 gene product in Drosophila melanogaster [Schistosoma japonicum] ||SJCHGC01924 protein [Schistosoma japonicum] ||unknown [Schistosoma japonicum] ||tumor protein D54-like [Aedes albopictus] ||CG5174-PI isoform I [Drosophila melanogaster] ref|NP_725790.1| CG5174-PI isoform I [Drosophila melanogaster] ||	CATCGTCATCGTTCAATCCCAATAATTCGAAAGGCAATAATTACGATGAGGATAATATAG	0	C800618.1	Smp_081380			Plus / Plus	Plus / Plus	Sense	CAY17277.1	tumor protein d52, putative [Schistosoma mansoni]				Q2_P18419,Q2_P22245
5960	71	10	Q2_P00197	NO	C800619.1	SJCHGC09608 protein [Schistosoma japonicum] ||SJCHGC09405 protein [Schistosoma japonicum] ||PREDICTED: similar to Phosphatidylinositol transfer protein alpha isoform (PtdIns transfer protein alpha) (PtdInsTP) (PI-TP-alpha) isoform 1 [Bos taurus] ||PREDICTED: similar to Phosphatidylinositol transfer protein alpha isoform (PtdIns transfer protein alpha) (PtdInsTP) (PI-TP-alpha) [Canis familiaris] |…	CCTACAACTTTTCGCTCTGAAAAAACTGGTCGTGGGCCCTTAAAGCCAAAATGGTGGGAG	0	C800619.1	Smp_029310			Plus / Minus	Plus / Minus	Sense	CAZ30613.1	phosphatidylinositol transfer protein [Schistosoma mansoni]	4e-87	NP_006215	>gi|5453908|ref|NP_006215.1| phosphatidylinositol transfer protein, alpha [Homo sapiens]	Q2_P32614,Q2_P00197
40250	474	45	Q2_P18420	NO	C800620.1	postsynaptic density protein 95 [Homo sapiens] gb|AAC52113.1| post-synaptic density protein 95 [Homo sapiens] ||discs large homolog 4 (Drosophila) [Mus musculus] ||PSD-95 beta [Mus musculus] ||post-synaptic density 95 [Homo sapiens] ||Dlg1 splice variant [Drosophila melanogaster] ||	GGTGGTCAAGATGTTGAGAATGAAAACTTTCCTTCAACTGGAATATTTATTACACGTATC	0	C800620.1	Smp_039650			Plus / Plus	Plus / Plus	Sense	CAZ31562.1	Crumbs complex protein; Patj homolog; cell polarity protein [Schistosoma mansoni]	1.5e-27	NP_001356	>gi|4557529|ref|NP_001356.1| post-synaptic density protein 95 isoform 1 [Homo sapiens]	Q2_P18420,Q2_P38879,Q2_P40403
19237	227	27	Q2_P18421	NO	C800621.1	SJCHGC04902 protein [Schistosoma japonicum] ||similar to NM_017775 hypothetical protein FLJ20343 in Homo sapiens hypothetical protein FLJ20343 in Homo sapiens [Schistosoma japonicum] ||	GCTGTAAGTCATTCTTTTCTCCTATCTTTTTACCATTATATCTTGTCGATTAGTACCGCT	0	C800621.1	Smp_076910			Plus / Plus	Plus / Plus	Sense	CAZ35102.1	Tetratricopeptide repeat protein 19 (TPR repeat protein 19), putative [Schistosoma mansoni]
40405	476	30	Q2_P18422	NO	C800622.1	unnamed protein product [Tetraodon nigroviridis] ||PREDICTED: similar to DEAH (Asp-Glu-Ala-His) box polypeptide 36 DEAD/H (Asp-Glu-Ala-Asp/His) box polypeptide 36 [Gallus gallus] ||PREDICTED: similar to DEAH (Asp-Glu-Ala-Asp/His) box polypeptide 57 isoform 1 [Strongylocentrotus purpuratus] ||DEAD/H box polypeptide 36 protein [Mus musculus] ref|NP_082412.1| DEAH (Asp-Glu-Ala-His) box polypeptide 3…	CCTCCAGCTGTTCAAGTTGAGAAATTATCTTAAAGACATCCTCCATAAGCATCTATAAAT	0	C800622.1	Smp_152840			Plus / Plus	Plus / Plus	Sense	CAZ33251.1	ATP-dependent RNA Helicase, putative [Schistosoma mansoni]	6.4e-43	NP_065916	>gi|167830433|ref|NP_065916.2| DEAH (Asp-Glu-Ala-His) box polypeptide 36 isoform 1 [Homo sapiens]	Q2_P16041,Q2_P20415,Q2_P01555,Q2_P18422,Q2_P33342,Q2_P29820,Q2_P28563,Q2_P24213,Q2_P04682,Q2_P10057,Q2_P08861
30707	362	22	Q2_P00198	NO	C800623.1	ATPase (putative) [Schistosoma mansoni] sp|P46508|YME1_SCHMA YME1 protein homolog ||	GAGCGAGAGAAAAAGAATACTCTAACTGTACCCAATGAAAGTTATATGTGCGTATATGTA	0	C800623.1	Smp_055760.2			Plus / Minus	Plus / Minus	Sense	CAZ33087.1	family M41 unassigned peptidase (M41 family) [Schistosoma mansoni]	1e-101	NP_055078	>gi|7657689|ref|NP_055078.1| YME1-like 1 isoform 3 [Homo sapiens]
4168	50	3	Q2_P00199	NO	C800624.1	similar to NM_080743 serine-arginine repressor protein (35 kDa) in Homo sapiens [Schistosoma japonicum] ||FUS interacting protein (serine-arginine rich) 1 [Xenopus tropicalis] ref|NP_001011096.1| FUS interacting protein (serine-arginine rich) 1 [Xenopus tropicalis] ||MGC53149 protein [Xenopus laevis] ||hypothetical protein [Gallus gallus] ref|NP_001026077.1| FUS interacting protein (serine-argini…	GAGACAACCGTGCTGTCTCCAGAAGTCCTGCACATAGGCGTGGTTCTTTATCACGATCTC	0	C800624.1	Smp_032320.6			Plus / Minus	Plus / Minus	Sense	CAZ30905.1	serine/arginine rich splicing factor, putative [Schistosoma mansoni]	3.3e-24	NP_542781	>gi|148612890|ref|NP_542781.3| serine-arginine repressor protein [Homo sapiens]	Q2_P02086,Q2_P07782,Q2_P27457,Q2_P00199
27749	327	39	Q2_P18423	NO	C800625.1	none	CGGAGAAAGAGATCTGGAAAACTTTCTGCTTCTAGCTATGAACTTGAAATAAAATGGTTT	0	C800625.1	Smp_174030			Plus / Plus	Plus / Plus	Sense	CAY17703.1	hypothetical protein [Schistosoma mansoni]
43554	513	34	Q2_P00201	NO	C800626.1	SJCHGC04525 protein [Schistosoma japonicum] ||PREDICTED: similar to deoxyribonuclease I partial [Strongylocentrotus purpuratus] ||Deoxyribonuclease I-like 3 like [Danio rerio] ref|NP_001002403.1| deoxyribonuclease I-like 3 like [Danio rerio] ||hypothetical protein LOC445317 [Danio rerio] gb|AAH79505.1| Zgc:101000 [Danio rerio] ||deoxyribonuclease I precursor [Bos taurus] ||	TTGGGCTATTCCTGATAAACATGATACAACTTTAGGTAAAGGTGATTGTGCATATGACAG	0	C800626.1	Smp_130090			Plus / Minus	Plus / Minus	Sense	CAZ29162.1	deoxyribonuclease 1 related [Schistosoma mansoni]				Q2_P19615,Q2_P00201
31246	368	51	Q2_P18424	NO	C800627.1	unknown [Schistosoma japonicum] ||SJCHGC05650 protein [Schistosoma japonicum] ||SJCHGC00591 protein [Schistosoma japonicum] ||PREDICTED: similar to ENSANGP00000002751 [Apis mellifera] ||PREDICTED: similar to non-neuronal splice variant nPTB4 isoform 11 [Danio rerio] ||	TTCAATCACATTCTTTGAATCTTCGTCTTACGTACTCCTCAACGCTGTTTACTTCGTTTC	0	C800627.1	Smp_036590.1			Plus / Plus	Plus / Plus	Sense
42121	496	46	Q2_P18425	NO	C800629.1	SJCHGC09194 protein [Schistosoma japonicum] ||SJCHGC04426 protein [Schistosoma japonicum] ||MGC68804 protein [Xenopus laevis] ||MGC68804 protein [Xenopus laevis] ||hepatocyte growth factor-regulated tyrosine kinase substrate [Xenopus tropicalis] ||	CGGCCACATTTTGATCAAAGGCCAAATAAGTAAAAAGCTGATATGCCCTTAAAATATTCA	0	C800629.1	Smp_093740.3			Plus / Plus	Plus / Plus	Sense	CAZ36560.1	hepatocyte growth factor-regulated tyrosine kinase substrate (hgs), putative [Schistosoma mansoni]	1.1e-97	NP_004703	>gi|4758528|ref|NP_004703.1| hepatocyte growth factor-regulated tyrosine kinase substrate [Homo sapiens]
17242	203	72	Q2_P18426	NO	C800630.1	SJCHGC08268 protein [Schistosoma japonicum] ||	TAGGAGTTATTTGTTATCGTTTATCTCAACATGGATGGCAAGAACTGGCTAGTATGCTGG	0	C800630.1	Smp_168070			Plus / Plus	Plus / Plus	Sense	CAY17327.1	tumor necrosis factor receptor related [Schistosoma mansoni]	2.5e-26	NP_002498	>gi|4505393|ref|NP_002498.1| nerve growth factor receptor precursor [Homo sapiens]	Q2_P18426,Q2_P37349,Q2_P06062,Q2_P25709
15588	184	33	Q2_P00204	NO	C800634.1	SJCHGC02683 protein [Schistosoma japonicum] ||SJCHGC02684 protein [Schistosoma japonicum] ||	CAGATTCACCTAGATTACGTACATCATTTTCTAGTGAAACACGACATCGTAATTCATCAT	0	C800634.1	Smp_138210			Plus / Minus	Plus / Minus	Sense	CAZ30641.1	conserved hypothetical protein [Schistosoma mansoni]				Q2_P00204
7627	90	62	Q2_P18430	NO	C800635.1	SJCHGC03903 protein [Schistosoma japonicum] ||calpain 7 [Mus musculus] sp|Q9R1S8|CAN7_MOUSE Calpain-7 (PalB homolog) (PalBH) dbj|BAA78731.1| PalBH [Mus musculus] ||Capn7 protein [Mus musculus] ||PREDICTED: similar to PalBH [Gallus gallus] ||calpain 7 [Rattus norvegicus] gb|AAH99770.1| Calpain 7 [Rattus norvegicus] ||	CTGATTCCCGTTCTTCATGTGGTAGTTTAACGCCACAAATGACAGGAGTATCTAAGAAAT	0	C800635.1	Smp_083530.1			Plus / Plus	Plus / Plus	Sense	CAZ35691.1	calpain-7 (C02 family) [Schistosoma mansoni]	0.0	NP_055111	>gi|7656959|ref|NP_055111.1| calpain 7 [Homo sapiens]
12073	143	3	Q2_P18431	NO	C800636.1	SJCHGC05772 protein [Schistosoma japonicum] ||SJCHGC03816 protein [Schistosoma japonicum] ||	GAGAGCCGAAACTTAATAGGATTAGTTTATGTTCCACTTGATCATAGTACATGGAAATCA	0	C800636.1	Smp_057590			Plus / Plus	Plus / Plus	Sense	CAZ33284.1	hypothetical protein [Schistosoma mansoni]				Q2_P18431
14205	168	10	Q2_P18432	NO	C800637.1	Hypothetical protein F56C9.3 [Caenorhabditis elegans] ref|NP_498611.1| F56C9.3 [Caenorhabditis elegans] ||hypothetical protein F56C9.3 - Caenorhabditis elegans ||Hypothetical protein R02F11.3b [Caenorhabditis elegans] ref|NP_001024066.1| R02F11.3b [Caenorhabditis elegans] ||Hypothetical protein R02F11.3a [Caenorhabditis elegans] ref|NP_001024065.1| R02F11.3a [Caenorhabditis elegans] ||Hypothetica…	CAGTTGAACGAGCTTTTGTACATTTAGATTATGAATTTTCACATCGTCCAGAAACTGAAC	0	C800637.1	Smp_150230			Plus / Plus	Plus / Plus	Sense	CAZ32779.1	cation efflux protein/ zinc transporter, putative [Schistosoma mansoni]				Q2_P18432,Q2_P34877,Q2_P34195,Q2_P00330,Q2_P14312,Q2_P14951
2429	29	49	Q2_P18433	NO	C800638.1	SJCHGC02644 protein [Schistosoma japonicum] ||unnamed protein product [Tetraodon nigroviridis] ||Zgc:101894 [Danio rerio] ref|NP_001004671.1| hypothetical protein LOC447933 [Danio rerio] ||similar to ubiquitously-expressed transcript isoform 1 [Rattus norvegicus] gb|AAH82752.1| Similar to ubiquitously-expressed transcript isoform 1 [Rattus norvegicus] ||ubiquitously expressed transcript [Mus musc…	GGTCTCCGAAATCTCCAAAATATTAAACGGGACTGCTAAACAGTAATAAGATTTTTCTGT	0	C800638.1	Smp_042280.2			Plus / Plus	Plus / Plus	Sense	CAZ31813.1	expressed protein [Schistosoma mansoni]				Q2_P18433
39948	470	83	Q2_P18434	NO	C800639.1	SJCHGC05857 protein [Schistosoma japonicum] ||SJCHGC01663 protein [Schistosoma japonicum] ||glycerol 3-phosphate dehydrogenase [Schistosoma mansoni] ||glycerol-3-phosphate dehydrogenase 1-like [Homo sapiens] gb|AAH28726.1| Glycerol-3-phosphate dehydrogenase 1-like [Homo sapiens] ||KIAA0089 [Homo sapiens] ||	GACCAAACTACCGCCCAGTTCAGGAAATACAACACAAAAATTAACTTTTATCGTTTATTG	0	C800639.1	Smp_168310.2			Plus / Plus	Plus / Plus	Sense	CAY17332.1	glycerol-3-phosphate dehydrogenase, putative [Schistosoma mansoni]	1.7e-35	NP_055956	>gi|24307999|ref|NP_055956.1| glycerol-3-phosphate dehydrogenase 1-like [Homo sapiens]
44951	529	71	Q2_P18435	NO	C800640.1	SJCHGC03465 protein [Schistosoma japonicum] ||PREDICTED: similar to mitochondrial ribosomal protein L18 [Strongylocentrotus purpuratus] ||PREDICTED: similar to mitochondrial ribosomal protein L18 [Strongylocentrotus purpuratus] ||MRPL18 protein [Homo sapiens] ref|NP_054880.2| mitochondrial ribosomal protein L18 [Homo sapiens] emb|CAI19751.1| MRPL18 [Homo sapiens] emb|CAI21852.1| MRPL18 [Homo sapi…	ATAGATTATGACAGTATGTCAGATGAAGAAAAACGTGCCATGTATCCAAGCCTTATTGAA	0	C800640.1	Smp_186560			Plus / Plus	Plus / Plus	Sense	CAY18718.1	expressed protein [Schistosoma mansoni]	2.3e-25	NP_054880	>gi|21265080|ref|NP_054880.2| mitochondrial ribosomal protein L18 [Homo sapiens]	Q2_P30847,Q2_P18435
6746	80	31	Q2_P18436	NO	C800641.1	SJCHGC04886 protein [Schistosoma japonicum] ||Hypothetical protein CBG11883 [Caenorhabditis briggsae] ||Zgc:92303 [Danio rerio] ref|NP_001004581.1| hypothetical protein LOC447842 [Danio rerio] ||PREDICTED: similar to ATP-dependent Clp protease ATP-binding subunit ClpX-like mitochondrial precursor [Danio rerio] ||unnamed protein product [Tetraodon nigroviridis] ||	GGTCACTGGCTACTTCGGAAGATAATGGATTTAATTCAAATAGTTTAAACTCAGGAACAA	0	C800641.1	Smp_063490			Plus / Plus	Plus / Plus	Sense	CAZ33857.1	hsl and clp protease, putative [Schistosoma mansoni]				Q2_P18436,Q2_P31736,Q2_P36453,Q2_P16210,Q2_P11918
43076	507	66	Q2_P18437	NO	C800643.1	SJCHGC02384 protein [Schistosoma japonicum] ||similar to GenBank Accession Number BC017472 unknown (protein for MGC:10198) in Homo sapiens [Schistosoma japonicum] ||hypothetical protein LOC201965 [Homo sapiens] gb|AAH17472.1| Hypothetical protein MGC10198 [Homo sapiens] ||Hypothetical protein LOC201965 [Homo sapiens] ||MGC89285 protein [Xenopus tropicalis] ref|NP_001007935.1| MGC89285 protein [Xe…	CGCGTTTCATATTGTCCATTGATTATGGGTTAAAATGATAAGAGGGTCATGAGTTTCTAA	0	C800643.1	Smp_074950			Plus / Plus	Plus / Plus	Sense	CAZ34909.1	expressed protein [Schistosoma mansoni]	2.5e-32	NP_689895	>gi|116256479|ref|NP_689895.2| RWD domain containing 4A [Homo sapiens]
31483	371	33	Q2_P18438	NO	C800644.1	SJCHGC09085 protein [Schistosoma japonicum] ||similar to NM_002868 RAB5B member RAS oncogene family in Homo sapiens [Schistosoma japonicum] ||RAB5A member RAS oncogene family [Homo sapiens] gb|AAH01267.1| RAB5A member RAS oncogene family [Homo sapiens] emb|CAG38731.1| RAB5A [Homo sapiens] gb|AAM21084.1| small GTP binding protein RAB5A [Homo sapiens] gb|AAO15677.1| cervical cancer oncogene 10 prot…	TAAAATAATATCGTGTTGCCCATTTTGTTGTATTGTTTTTGATTTCAACCAGTTGGCGCG	0	C800644.1	Smp_040570.1			Plus / Plus	Plus / Plus	Sense	CAZ31649.1	rab5, putative [Schistosoma mansoni]	2.9e-64	NP_004153	>gi|19923262|ref|NP_004153.2| RAB5A, member RAS oncogene family [Homo sapiens]
3204	38	59	Q2_P18439	NO	C800645.1	SJCHGC09506 protein [Schistosoma japonicum] ||SJCHGC09507 protein [Schistosoma japonicum] ||hypothetical protein DDB0189975 [Dictyostelium discoideum] gb|EAL72946.1| hypothetical protein DDB0189975 [Dictyostelium discoideum] ||SPBC19C2.13c [Schizosaccharomyces pombe] ref|NP_595698.1| hypothetical protein SPBC19C2.13c [Schizosaccharomyces pombe 972h-] ||GA10142-PA [Drosophila pseudoobscura] ||	TTAGTGAAAAAACAGTTCCTGGAGTTATTGAGAAGGACTTATGTCTCTCCTGTTCATTAA	0	C800645.1	Smp_090690			Plus / Plus	Plus / Plus	Sense	CAZ36328.1	expressed protein [Schistosoma mansoni]				Q2_P35923,Q2_P18439
4572	54	67	Q2_P18440	NO	C800646.1	PREDICTED: similar to transcription factor IIB [Apis mellifera] ||PREDICTED: similar to transcription factor IIB [Canis familiaris] gb|AAT84373.1| transcription factor 2B [Bos taurus] dbj|BAC40521.1| unnamed protein product [Mus musculus] ref|NP_001003905.1| likely ortholog of mouse gene trap locus 3 [Bos taurus] ref|XP_226238.3| PREDICTED: similar to transcription factor IIB [Rattus norvegicus] …	GCTGAATTACACATTGTTTTCTCAGTTGCATCATAATTTTACTGGGTTAACGTCATGTTG	0	C800646.1	Smp_172850			Plus / Plus	Plus / Plus	Sense	CAY17565.1	expressed protein [Schistosoma mansoni]
26315	310	50	Q2_P18441	NO	C800648.1	SJCHGC01159 protein [Schistosoma japonicum] ||	CGGCAATGGGTGGATACACTCAAGTCTTTATTAGATCTATGGGATAAATTGTTAAAATCT	0	C800648.1	Smp_064600			Plus / Plus	Plus / Plus	Sense	CAZ33949.1	expressed protein [Schistosoma mansoni]				Q2_P18441
2353	28	58	Q2_P18442	NO	C800649.1	SJCHGC03273 protein [Schistosoma japonicum] ||PREDICTED: similar to WT1-interacting protein [Danio rerio] ||PREDICTED: similar to CG11063-PB [Apis mellifera] ||CG11063-PB [Drosophila melanogaster] ref|NP_572930.2| CG11063-PB [Drosophila melanogaster] ||WT1-interacting protein [Mus musculus] gb|AAH54125.1| WT1-interacting protein [Mus musculus] ||	TGTGGATTTCAACAAACAGTGGAGAAATGTTTTGCATGTGGACATATTATTGCTGAAACA	0	C800649.1	Smp_163960			Plus / Plus	Plus / Plus	Sense	CAZ35162.1	limd1, putative [Schistosoma mansoni]	1.3e-53	NP_055055	>gi|7657307|ref|NP_055055.1| LIM domains containing 1 [Homo sapiens]	Q2_P18442,Q2_P24830,Q2_P15622,Q2_P35620
7419	88	24	Q2_P18443	NO	C800650.1	PREDICTED: similar to phosphatidylinositol glycan class T partial [Strongylocentrotus purpuratus] ||PREDICTED: similar to ENSANGP00000020793 [Apis mellifera] ||unknown protein [Arabidopsis thaliana] ||unknown protein [Arabidopsis thaliana] gb|AAK92821.1| unknown protein [Arabidopsis thaliana] ref|NP_566299.1| GPI transamidase component Gpi16 subunit family protein [Arabidopsis thaliana] ||GPI tra…	TCGGTTTGGGAAGCTTGTTGCGTCCAACTTCACTGTTTAAGTCAAATTACAACACCATGA	0	C800650.1	Smp_020210			Plus / Plus	Plus / Plus	Sense	CAZ29707.1	expressed protein [Schistosoma mansoni]	3.5e-67	NP_057021	>gi|23397653|ref|NP_057021.2| phosphatidylinositol glycan anchor biosynthesis, class T precursor [Homo sapiens]	Q2_P18443,Q2_P25409,Q2_P13435,Q2_P33284
40182	473	62	Q2_P18444	NO	C800651.1	SJCHGC06250 protein [Schistosoma japonicum] ||similar to NM_069913 protein disulphide isomerase-related protein like in Caenorhabditis elegans [Schistosoma japonicum] ||FAD-dependent sulfhydryl oxidase [Rattus norvegicus] ||MGC86371 protein [Xenopus laevis] ||quiescin Q6 [Rattus norvegicus] gb|AAG53892.1| FAD-dependent sulfhydryl oxidase-2 [Rattus norvegicus] dbj|BAB21937.1| sulfhydryl oxidase [R…	GTGTATGTAGTCGTGGTTTTTTCCAACAACTCCAATTGATCAATCATTTGTTCTATCTCA	0	C800651.1	Smp_098710			Plus / Plus	Plus / Plus	Sense	CAY17846.1	quiescin q6-related sulfhydryl oxidase [Schistosoma mansoni]	5e-30	NP_002817	>gi|13325075|ref|NP_002817.2| quiescin Q6 sulfhydryl oxidase 1 isoform a [Homo sapiens]
43852	516	77	Q2_P18446	NO	C800654.1	SJCHGC00953 protein [Schistosoma japonicum] ||ENSANGP00000027399 [Anopheles gambiae str. PEST] ref|XP_558140.1| ENSANGP00000027399 [Anopheles gambiae str. PEST] ||GA19975-PA [Drosophila pseudoobscura] ||ENSANGP00000017984 [Anopheles gambiae str. PEST] ref|XP_314570.2| ENSANGP00000017984 [Anopheles gambiae str. PEST] ||ENSANGP00000026839 [Anopheles gambiae str. PEST] ref|XP_558141.1| ENSANGP000000…	GGTGTTTGGAATTACTGTTTGTGTCAGTGTTTGTTACTTTACTCTGTTGGTATGTTTGTT	0	C800654.1	Smp_051080			Plus / Plus	Plus / Plus	Sense	CAZ32640.1	clathrin light chain, putative [Schistosoma mansoni]
1075	13	55	Q2_P18447	NO	C800655.1	SJCHGC03920 protein [Schistosoma japonicum] ||PREDICTED: similar to Hypothetical protein MGC75603 [Apis mellifera] ||Hypothetical protein LOC395022 [Xenopus tropicalis] ref|NP_989388.1| hypothetical protein LOC395022 [Xenopus tropicalis] ||PREDICTED: similar to Rnf10 protein [Danio rerio] ||CG12099-PB isoform B [Drosophila melanogaster] gb|AAF47511.1| CG12099-PA isoform A [Drosophila melanogaster…	ACGTAACTTCAGCTCCAGGTTTTGTTCTCAGTGGTCATGCAACTTTATCAGATAAACAAG	0	C800655.1	Smp_038700.1			Plus / Plus	Plus / Plus	Sense	CAZ31466.1	expressed protein [Schistosoma mansoni]				Q2_P18447,Q2_P13406,Q2_P33255,Q2_P18785,Q2_P26361,Q2_P13180,Q2_P10121,Q2_P31364,Q2_P06759,Q2_P00446
31201	368	6	Q2_P18449	NO	C800657.1	none	GGTTATTGGTAAAATCAAATCAACCACACAGTTCACAAGTGATGTCCATTTTGTCTTCAA	0	C800657.1	Smp_142380			Plus / Plus	Plus / Plus	Sense	CAZ31336.1	expressed protein [Schistosoma mansoni]	2.1e-27	NP_064578	>gi|19923559|ref|NP_064578.2| EMSY protein [Homo sapiens]	Q2_P00207,Q2_P18449,Q2_P33419,Q2_P13565,Q2_P13900,Q2_P33767,Q2_P41316,Q2_P29982,Q2_P11630,Q2_P31428,Q2_P40531,Q2_P38965,Q2_P10213
36962	435	72	Q2_P18450	NO	C800658.1	none	GTCAACTCCACGTCGTCATCGTCATTTACAAGATGGTCGAAAATCAGAATATTATTTAAA	0	C800658.1	Smp_169430			Plus / Plus	Plus / Plus	Sense	CAZ36014.1	cell polarity protein; partition defective complex protein [Schistosoma mansoni]	1.8e-21	NP_062565	>gi|21361831|ref|NP_062565.2| partitioning-defective protein 3 homolog [Homo sapiens]	Q2_P00208,Q2_P18450,Q2_P30763,Q2_P10973,Q2_P22919,Q2_P30240,Q2_P36813,Q2_P03600,Q2_P10465
3183	38	38	Q2_P18451	NO	C800659.1	none	GTTAACAGAGTGGTTGAAAGTAAGGACAACAAAACTTCAGGTAACTGTCCATTGCCGCAG	0	C800659.1	Smp_152860			Plus / Plus	Plus / Plus	Sense	CAZ33255.1	expressed protein [Schistosoma mansoni]	1e-100	NP_060205	>gi|42476022|ref|NP_060205.3| tetratricopeptide repeat domain 27 [Homo sapiens]	Q2_P18451,Q2_P00209,Q2_P21007,Q2_P21002,Q2_P02028
15166	179	36	Q2_P18452	NO	C800660.1	PREDICTED: similar to MAP kinase [Apis mellifera] ||mitogen-activated protein kinase 1 [Meloidogyne artiellia] ||MAP kinase ||CG12559-PB.3 [Drosophila melanogaster] ref|NP_001015123.1| CG12559-PD.3 [Drosophila melanogaster] ref|NP_001015122.1| CG12559-PC.3 [Drosophila melanogaster] gb|AAL48618.1| RE08694p [Drosophila melanogaster] gb|EAA46312.2| CG12559-PB.3 [Drosophila melanogaster] gb|EAA46311.…	ATGTTCTTCATAGGGATCTTAAGCCGTGCAACATCTTGTTGAATGCAGCGTGTGACTTAA	0	C800660.1	Smp_142050			Plus / Plus	Plus / Plus	Sense	CAZ31282.1	serine/threonine kinase [Schistosoma mansoni]	3e-139	NP_620407	>gi|20986531|ref|NP_620407.1| mitogen-activated protein kinase 1 [Homo sapiens]	Q2_P18452,Q2_P15810,Q2_P33085,Q2_P23547,Q2_P30611,Q2_P10817,Q2_P13228
14535	171	85	Q2_P00210	NO	C800662.1	SJCHGC02359 protein [Schistosoma japonicum] ||SJCHGC05938 protein [Schistosoma japonicum] ||PREDICTED: similar to CG9619-PA [Strongylocentrotus purpuratus] ||unnamed protein product [Tetraodon nigroviridis] ||CG9619-PA [Drosophila melanogaster] ref|NP_649104.1| CG9619-PA [Drosophila melanogaster] ||	GATCGGAAGTGAGATATTTATGGTGATCAACTGCCTTTGAATCCTATGTATTACGATAAT	0	C800662.1	Smp_153700			Plus / Minus	Plus / Minus	Sense	CAZ33388.1	protein phosphatase 1 binding protein, putative [Schistosoma mansoni]
3793	45	53	Q2_P18454	NO	C800663.1	SJCHGC04674 protein [Schistosoma japonicum] ||putative CAM kinase (CAMK) [Dictyostelium discoideum] gb|EAL67293.1| putative protein serine/threonine kinase [Dictyostelium discoideum] ||hypothetical protein DDB0188286 [Dictyostelium discoideum] gb|EAL62883.1| hypothetical protein DDB0188286 [Dictyostelium discoideum] ||similar to Dictyostelium discoideum (Slime mold). Ubiquitin hydrolase B (Fragme…	CAAGGATGTGTTTATCCAACAACAGCTGATCTAAATACTACTTTCAATGCCACTTATCAT	0	C800663.1	Smp_150480			Plus / Plus	Plus / Plus	Sense	CAY16890.1	single-stranded DNA-binding protein mssp-1, putative [Schistosoma mansoni]				Q2_P18454
32768	386	43	Q2_P18455	NO	C800665.1	none	GTGCAAACTCGTCGCCAGTTTATTGAGTCAGGAATAAAATATGCACGTCGAGCGTTAAGC	0	C800665.1	Smp_173640			Plus / Plus	Plus / Plus	Sense	CAY17650.1	expressed protein [Schistosoma mansoni]				Q2_P00212,Q2_P18455
37267	439	37	Q2_P18456	NO	C800666.1	none	ACAAAAAAGTGACGTACCAAATGCAACTGATTCAGAGAAACGTCGAAGTGAATTAAAAGT	0	C800666.1	Smp_127450			Plus / Plus	Plus / Plus	Sense	CAZ28692.1	expressed protein [Schistosoma mansoni]				Q2_P00213,Q2_P03340,Q2_P21745,Q2_P02656,Q2_P13636,Q2_P33506,Q2_P00405,Q2_P18456,Q2_P28324,Q2_P28036,Q2_P08617,Q2_P17542,Q2_P38008,Q2_P23571,Q2_P31749,Q2_P41212,Q2_P22625,Q2_P02655
31174	367	64	Q2_P00215	NO	C800669.1	SJCHGC06723 protein [Schistosoma japonicum] ||	GGATTAATTACAATACAGTAAGGATCCCCATTTTGTTTGTTTGGTTGGTTGGTTTGTTCT	0	C800669.1	Smp_134080			Plus / Minus	Plus / Minus	Sense	CAZ29877.1	inositol transporter [Schistosoma mansoni]	2e-165	NP_008864	>gi|110835708|ref|NP_008864.3| solute carrier family 5 (inositol transporters), member 3 [Homo sapiens]	Q2_P00215,Q2_P09537,Q2_P18106
12956	153	36	Q2_P00216	NO	C800671.1	none	ACGTAACGTTGAATCCGTTTTTACCCTTCTCTCAACCATTCATCCACTTTATTCTTTTTT	0	C800671.1	Smp_154540			Plus / Minus	Plus / Minus	Sense	CAZ33570.1	expressed protein [Schistosoma mansoni]				Q2_P33536,Q2_P18905,Q2_P14669,Q2_P34571,Q2_P13504,Q2_P33358,Q2_P13464,Q2_P33313,Q2_P00402,Q2_P18459,Q2_P00216,Q2_P14115,Q2_P33991,Q2_P20361,Q2_P01506,Q2_P03304,Q2_P22576,Q2_P21853,Q2_P02740,Q2_P30527,Q2_P10739,Q2_P24607,Q2_P06314,Q2_P00530,Q2_P13665
10861	128	66	Q2_P18460	NO	C800672.1	SJCHGC03918 protein [Schistosoma japonicum] ||	CACATGCTATGAAGTTGAAGTCAACGTCATCTGTACCTACTAAAAACTCTTAGGTTTTTT	0	C800672.1	Smp_005570			Plus / Plus	Plus / Plus	Sense	CAZ28256.1	expressed protein [Schistosoma mansoni]	7.6e-21	NP_110436	>gi|13540602|ref|NP_110436.1| TGF-beta induced apoptosis protein 12 [Homo sapiens]
17103	202	18	Q2_P00217	NO	C800673.1	similar to GenBank Accession Number L17340 transcription factor in Drosophila melanogaster (TF1) [Schistosoma japonicum] ||SJCHGC03577 protein [Schistosoma japonicum] ||SJCHGC03711 protein [Schistosoma japonicum] ||PREDICTED: similar to Activator 1 140 kDa subunit (Replication factor C large subunit) (Germline transcription factor 1) [Apis mellifera] ||unnamed protein product [Tetraodon nigroviri…	CAGTAGAGGTAGAGGGAAAGATTAAAACACATATACATACATTCATTCATTCGCTTGTTG	0	C800673.1	Smp_004020			Plus / Minus	Plus / Minus	Sense	CAZ28094.1	chromosome transmission fidelity factor, putative [Schistosoma mansoni]	5e-142	NP_002904	>gi|32528306|ref|NP_002904.3| replication factor C large subunit [Homo sapiens]	Q2_P20048,Q2_P40797,Q2_P22579,Q2_P00217
11855	140	40	Q2_P18461	NO	C800674.1	methionine sulfoxide reductase B2a [Schistosoma mansoni] ||SJCHGC02204 protein [Schistosoma japonicum] ||similar to XM_084887 similar to hypothetical protein CGI-131 in Homo sapiens hypothetical protein CGI-131 in Homo sapiens [Schistosoma japonicum] ||methionine-R-sulfoxide reductase B3 [Mus musculus] dbj|BAE23258.1| unnamed protein product [Mus musculus] gb|AAH96447.1| Methionine-R-sulfoxide re…	GTGTTGCATTTCTAATCTCATGCTTTTTCCCAAAGTCTTATGATGAAACTTTGTGATGCT	0	C800674.1	Smp_143340			Plus / Plus	Plus / Plus	Sense	CAZ31491.1	methionine sulfoxide reductase, putative [Schistosoma mansoni]	8.6e-37	NP_001026849	>gi|73089054|ref|NP_001026849.1| methionine sulfoxide reductase B3 isoform 2 [Homo sapiens]
36123	425	83	Q2_P18462	NO	C800675.1	PREDICTED: similar to dihydrolipoamide S-acetyltransferase (E2 component of pyruvate dehydrogenase complex) isoform 2 [Canis familiaris] ||PREDICTED: similar to dihydrolipoamide S-acetyltransferase (E2 component of pyruvate dehydrogenase complex) dihydrolipoamide S-acetyltransferase precursor [Gallus gallus] ||Hypothetical protein CBG04612 [Caenorhabditis briggsae] ||dihydrolipoamide S-acetyltran…	ATTGTCTCTTGTTGCTAGGATTATCTCCTTGATGTATCTCCCCTTATTACTCTCTTTTTT	0	C800675.1	Smp_175610.1			Plus / Plus	Plus / Plus	Sense	CAZ36859.1	dihydrolipoamide acetyltransferase component of pyruvate dehydrogenase, putative [Schistosoma mansoni]	5.2e-52	NP_004777	>gi|4759274|ref|NP_004777.1| thioredoxin-like 1 [Homo sapiens]
22902	270	37	Q2_P18463	NO	C800676.1	SJCHGC04972 protein [Schistosoma japonicum] ||	GTAAACGTGGTGTAATTCGAATCCTCTGTCCTAGTATGGCTAGTTGTCCTGCTAGTCTTG	0	C800676.1	Smp_165220			Plus / Plus	Plus / Plus	Sense	CAZ35342.1	embryonic ectoderm development protein, putative [Schistosoma mansoni]	5.6e-79	NP_003788	>gi|24041020|ref|NP_003788.2| embryonic ectoderm development isoform a [Homo sapiens]	Q2_P02576,Q2_P18463,Q2_P05400,Q2_P36790,Q2_P16508,Q2_P01511
23230	274	25	Q2_P18464	NO	C800677.1	none	CCCAGAAACTCAACGCAACTTAAGTGGGAGCTGCTATTCAACGGAAATTACGATTGTATC	0	C800677.1	Smp_175590			Plus / Plus	Plus / Plus	Sense	CAZ36857.1	tyrosine kinase [Schistosoma mansoni]	1.1e-21	NP_000132	>gi|221316639|ref|NP_000132.3| fibroblast growth factor receptor 2 isoform 1 precursor [Homo sapiens]	Q2_P00218,Q2_P18464,Q2_P28726,Q2_P10471,Q2_P09006,Q2_P30249
16380	193	60	Q2_P18465	NO	C800678.1	SJCHGC08681 protein [Schistosoma japonicum] ||	ATTCACTGTTGATGAGGTTGCTAGTGTCGTTGAAGTACACTACACAAACAAACTTAATCT	0	C800678.1	Smp_004590			Plus / Plus	Plus / Plus	Sense	CAZ28147.1	hypothetical protein [Schistosoma mansoni]				Q2_P18465,Q2_P34867,Q2_P39752,Q2_P38591,Q2_P14941
44757	527	47	Q2_P18466	NO	C800679.1	SJCHGC05591 protein [Schistosoma japonicum] ||	GCGAGAAAAGGTATCTGATCAAGTATAATTTTATCATTGTTATTTAGTGCTTAGTCCGCC	0	C800679.1	Smp_043210			Plus / Plus	Plus / Plus	Sense	CAZ31897.1	tetraspanin, putative [Schistosoma mansoni]
35560	419	30	Q2_P18467	NO	C800680.1	SJCHGC09526 protein [Schistosoma japonicum] ||	CGAGTTTCCTACTTGGTTTTACTTTACATTACTCTTCTCCAAAACTGTTTTTGACTGCTT	0	C800680.1	Smp_083730.1			Plus / Plus	Plus / Plus	Sense	CAZ35712.1	expressed protein [Schistosoma mansoni]
41938	494	33	Q2_P18468	NO	C800681.1	SJCHGC06387 protein [Schistosoma japonicum] ||CG15747-PA [Drosophila melanogaster] ref|NP_727694.1| CG15747-PA [Drosophila melanogaster] ||PREDICTED: similar to CG15747-PA [Strongylocentrotus purpuratus] ||Wu:fc14d05 protein [Danio rerio] ||Wu:fc14d05 protein [Danio rerio] ||	CACCGTCACACTACAAGTAAAGAAGATCATTTAGAAGCAGAATCTAATTTTTCATCTACC	0	C800681.1	Smp_159940			Plus / Plus	Plus / Plus	Sense	CAZ34406.1	expressed protein [Schistosoma mansoni]	1.8e-24	NP_115517	>gi|14149807|ref|NP_115517.1| coiled-coil domain containing 55 isoform 1 [Homo sapiens]	Q2_P18468,Q2_P40222,Q2_P38760
22490	265	50	Q2_P18469	NO	C800682.1	similar to GenBank Accession Number AF257659 crocalbin-like protein in Homo sapiens [Schistosoma japonicum] ||hypothetical protein LOC394057 [Danio rerio] gb|AAH55227.1| Similar to calumenin [Danio rerio] ||PREDICTED: similar to calumenin precursor [Strongylocentrotus purpuratus] ||Calumenin [Danio rerio] ref|NP_001002151.1| calumenin [Danio rerio] ||novel protein similar to vertebrate calumenin …	GGTTCATTTTTAGCCGATCTCTTTTGTGCGCATGCTTGTCATTAATATATTTTGTGATGT	0	C800682.1	Smp_005230.2			Plus / Plus	Plus / Plus	Sense	CAZ28220.1	reticulocalbin, putative [Schistosoma mansoni]	1.4e-76	NP_001124146	>gi|194578885|ref|NP_001124146.1| calumenin isoform b precursor [Homo sapiens]
29065	342	80	Q2_P18470	NO	C800683.1	none	GTGTATTGCTGTGCTTAACGCTCTTATCCACAAGTACTGAACAACTCTACGCAATATCCT	0	C800683.1	Smp_145720			Plus / Plus	Plus / Plus	Sense	CAY16875.1	expressed protein [Schistosoma mansoni]
33599	396	24	Q2_P18471	NO	C800685.1	SJCHGC06832 protein [Schistosoma japonicum] ||SJCHGC09094 protein [Schistosoma japonicum] ||hypothetical protein with IG domain [Schistosoma japonicum] ||PREDICTED: similar to basigin isoform 1 [Canis familiaris] ||basigin precursor - rabbit gb|AAB04759.1| gp42/basigin/OX-47/HT7 sp|Q28740|BASI_RABIT Basigin precursor (CD147 antigen) ||	GTAGATGCACACAATACTGGCTAGTGTAATTATTAAATAATCTGCTCATGTCTGCATAGT	0	C800685.1	Smp_043990.2			Plus / Plus	Plus / Plus	Sense	CAZ31959.1	basigin related [Schistosoma mansoni]
21137	249	57	Q2_P18472	NO	C800686.1	SJCHGC06408 protein [Schistosoma japonicum] ||pescadillo [Danio rerio] gb|AAH49339.1| Pescadillo [Danio rerio] ||Pes1-prov protein [Xenopus laevis] ||Pescadillo gb|AAB61138.1| Allele: hi2 [Danio rerio] ||Pescadillo homolog 1 containing BRCT domain [Xenopus tropicalis] ||	CGTGTGTCCATAACTAAGTGAAAAATGTTGACTGATGAGATGCCACTCAATAAATAGAAA	0	C800686.1	Smp_055800			Plus / Plus	Plus / Plus	Sense	CAZ33093.1	pescadillo-related [Schistosoma mansoni]	1e-102	NP_055118	>gi|7657455|ref|NP_055118.1| pescadillo homolog 1, containing BRCT domain [Homo sapiens]
327	4	72	Q2_P00220	NO	C800687.1	thioredoxin peroxidase 2 [Schistosoma mansoni] gb|AAD40685.1| thioredoxin peroxidase [Schistosoma mansoni] ||SJCHGC00794 protein [Schistosoma japonicum] ||thioredoxin peroxidase-2 [Schistosoma japonicum] ||thiol-specific antioxidant protein [Fasciola hepatica] ||peroxiredoxin [Fasciola hepatica] sp|P91883|TDX_FASHE Thioredoxin peroxidase (Peroxiredoxin) (Thioredoxin-dependent peroxide reductase) …	CCTACTTCTCCTCTGTGCACTGAGGTGTTTTGTATTGATGTCATATTTTAGTTAACATTA	0	C800687.1	Smp_158110.2			Plus / Minus	Plus / Minus	Sense	CAZ34124.1	thioredoxin peroxidase, putative [Schistosoma mansoni]	5.3e-63	NP_005800	>gi|32189392|ref|NP_005800.3| peroxiredoxin 2 isoform a [Homo sapiens]	Q2_P32771,Q2_P12936,Q2_P38261,Q2_P35894,Q2_P00220
41876	493	56	Q2_P18473	NO	C800688.1	SJCHGC02652 protein [Schistosoma japonicum] ||PREDICTED: similar to mitochondrial ribosomal protein S9 muscle protein 637 [Gallus gallus] ||mitochondrial ribosomal protein S9 [Bos taurus] ||mitochondrial ribosomal protein S9 [Homo sapiens] gb|AAH57240.1| Mitochondrial ribosomal protein S9 [Homo sapiens] ||PREDICTED: similar to mitochondrial ribosomal protein S9 28S ribosomal protein S9 mitochondr…	TTTCGCCGCCTTGGTTTCCAGCTCGATCATCTAAAGAAGAAAGCACAGATGTAAAACCAC	0	C800688.1	Smp_164780			Plus / Plus	Plus / Plus	Sense	CAZ35270.1	expressed protein [Schistosoma mansoni]	3.4e-27	NP_872578	>gi|33188463|ref|NP_872578.1| mitochondrial ribosomal protein S9 [Homo sapiens]	Q2_P15971,Q2_P18473
27890	329	10	Q2_P18474	NO	C800689.1	none	CCAAGTCATTCAGTACCAAGACGATCACCAAATATGGAAACACAACAATATTTAAGTACA	0	C800689.1	Smp_144290			Plus / Plus	Plus / Plus	Sense	CAZ31652.1	conserved hypothetical protein [Schistosoma mansoni]				Q2_P18474,Q2_P29743,Q2_P09993,Q2_P00221
38993	459	63	Q2_P18475	NO	C800690.1	CDC23 (cell division cycle 23 yeast homolog) [Danio rerio] ref|NP_957227.1| CDC23 (cell division cycle 23 yeast homolog) [Danio rerio] ||CDC23 (cell division cycle 23 yeast homolog) [Xenopus tropicalis] ||PREDICTED: hypothetical protein XP_697315 [Danio rerio] ||MGC69122 protein [Xenopus laevis] ||unnamed protein product [Tetraodon nigroviridis] ||	TTGGCGTGCATATTGTGTTGGTGATATAGAAGGTGAAGCATTGATGCGATTAGCTATCTG	0	C800690.1	Smp_037400			Plus / Plus	Plus / Plus	Sense	CAZ31328.1	cell division cycle, putative [Schistosoma mansoni]	8e-107	NP_004652	>gi|118402596|ref|NP_004652.2| cell division cycle protein 23 [Homo sapiens]	Q2_P18475
32219	380	4	Q2_P00222	NO	C800691.1	SJCHGC03353 protein [Schistosoma japonicum] ||	GGGACAGAGAAGAAATCTGGAATTGTTAATCCAATGAAATCGGATATTTCCAGAAATTTG	0	C800691.1	Smp_176720			Plus / Minus	Plus / Minus	Sense	CAY17866.1	lipoma hmgic fusion partner-like protein 4 [Schistosoma mansoni]				Q2_P00222
6870	81	70	Q2_P18476	NO	C800692.1	SJCHGC01267 protein [Schistosoma japonicum] ||16 kDa calcium-binding protein (Egg antigen SME16) gb|AAA29859.1| calcium-binding protein ||SJCHGC01695 protein [Schistosoma japonicum] ||SJCHGC04850 protein [Schistosoma japonicum] ||similar to 16 kDa calcium-binding protein (EGG antigen SME16 in Schistosoma mansoni [Schistosoma japonicum] ||	GAAGTTTGTTCAGTCCATGTTATAAAAAGAGGACGTTGACTTCATTCAATCACCTTTAAG	0	C800692.1	Smp_033010			Plus / Plus	Plus / Plus	Sense	CAZ30974.1	calmodulin, putative [Schistosoma mansoni]				Q2_P18476
12879	152	44	Q2_P18478	NO	C800694.1	similar to E. coli phosphoserine phosphohydrolase Swiss-Prot Accession Number P06862 Method: conceptual translation supplied by author ||Hypothetical protein LOC606663 [Danio rerio] ref|NP_001028271.1| hypothetical protein LOC606663 [Danio rerio] ||3-phosphoserin phosphatase [Arabidopsis thaliana] dbj|BAA33806.1| 3-phosphoserine phosphatase [Arabidopsis thaliana] ||PREDICTED: similar to phosphose…	CCCGTATTATATGTGGATGTAATGCAAATATTCTTAATCAACCATTCCTAAACGCTGTTC	0	C800694.1	Smp_063340			Plus / Plus	Plus / Plus	Sense	CAZ33843.1	phosphoserine phosphatase, putative [Schistosoma mansoni]	1.4e-44	NP_004568	>gi|46249388|ref|NP_004568.2| phosphoserine phosphatase [Homo sapiens]
35049	413	29	Q2_P18479	NO	C800695.1	SJCHGC05883 protein [Schistosoma japonicum] ||	CCGACACAGCCGAAATCGTAGCTGATGTATGGCAGACAAAATGTATTGCTAGTCGTGCTG	0	C800695.1	Smp_097790.1			Plus / Plus	Plus / Plus	Sense						Q2_P18479
17339	204	84	Q2_P18480	NO	C800696.1	SJCHGC02504 protein [Schistosoma japonicum] ||MGC80600 protein [Xenopus laevis] ||hypothetical protein LOC268490 [Mus musculus] ref|XP_618195.1| PREDICTED: similar to CG15735-PA isoform 1 [Bos taurus] ref|XP_537623.2| PREDICTED: similar to CG15735-PA [Canis familiaris] emb|CAH91125.1| hypothetical protein [Pongo pygmaeus] dbj|BAE21407.1| unnamed protein product [Mus musculus] dbj|BAE30127.1| unna…	CGGATAATAGGAGTGGAAATTGACCTAACTCCCCTTTCAGAAAATATACAATATCTTCTA	0	C800696.1	Smp_023700.2			Plus / Plus	Plus / Plus	Sense	CAZ30038.1	expressed protein [Schistosoma mansoni]				Q2_P18480,Q2_P35738
11092	131	42	Q2_P18481	NO	C800698.1	PREDICTED: similar to Serine/threonine-protein kinase MARK2 (MAP/microtubule affinity-regulating kinase 2) (ELKL motif kinase) (EMK1) (PAR1 homolog) partial [Danio rerio] ||Mark2-prov protein [Xenopus laevis] ||serine/threonine kinase [Xenopus laevis] ||PREDICTED: similar to MAP/microtubule affinity-regulating kinase 4 (MAP/microtubule affinity-regulating kinase-like 1) [Canis familiaris] ||Ser/T…	TAGTGGATCTCAACATAATGGAGTACGACGGATCAGTGGTATTTCTTGGATGAAGCAAAG	0	C800698.1	Smp_169900.2			Plus / Plus	Plus / Plus	Sense	CAY17458.1	serine/threonine kinase [Schistosoma mansoni]	6e-139	NP_061120	>gi|153791472|ref|NP_061120.3| MAP/microtubule affinity-regulating kinase 1 [Homo sapiens]	Q2_P00580,Q2_P10865,Q2_P18481
28685	338	40	Q2_P00224	NO	C800699.1	SJCHGC02546 protein [Schistosoma japonicum] ||SJCHGC02545 protein [Schistosoma japonicum] ||Unknown (protein for MGC:84969) [Xenopus laevis] ||PREDICTED: similar to phospholipid scramblase 1 isoform 2 [Bos taurus] gb|AAI03300.1| Unknown (protein for MGC:128844) [Bos taurus] ||PREDICTED: similar to phospholipid scramblase 1 isoform 1 [Bos taurus] ||	GACGGTACTGTAGAAATAGGTAGAATTACCAGAAAATGGAGCAATATTATCCAAGAACTA	0	C800699.1	Smp_008860			Plus / Minus	Plus / Minus	Sense	CAZ28590.1	phospholipid scramblase 1, putative [Schistosoma mansoni]	2e-47	NP_066928	>gi|10863877|ref|NP_066928.1| phospholipid scramblase 1 [Homo sapiens]	Q2_P00038,Q2_P00224,Q2_P17983
15436	182	51	Q2_P18482	NO	C800700.1	SJCHGC08996 protein [Schistosoma japonicum] ||	GTGACAAATCGCAAAATGCATCTAATGTCGATGCGAAACAATCAGATCACAGTTATAATT	0	C800700.1	Smp_146300			Plus / Plus	Plus / Plus	Sense	CAZ32032.1	expressed protein [Schistosoma mansoni]	7.6e-28	NP_062826	>gi|21361827|ref|NP_062826.2| methyltransferase like 3 [Homo sapiens]	Q2_P06244,Q2_P18482
38965	459	35	Q2_P18483	NO	C800701.1	SJCHGC05939 protein [Schistosoma japonicum] ||hypothetical protein T04C9 similar to GenBank Accession Number T25859 hypothetical protein T04C9 [Schistosoma japonicum] ||FERM domain containing 3 [Mus musculus] emb|CAI26190.1| FERM domain containing 3 [Mus musculus] ||FERM domain containing 3 [Mus musculus] emb|CAI26189.1| FERM domain containing 3 [Mus musculus] ||ENSANGP00000018824 [Anopheles gamb…	ATCTAAAACTGCAGCATTTGCTTTTTGGCATTGGGTTGTTGATAGAAAATGCTTCTTCAC	0	C800701.1	Smp_095620.1			Plus / Plus	Plus / Plus	Sense	CAZ36694.1	4.1 G protein, putative [Schistosoma mansoni]	3.4e-29	NP_777598	>gi|117500790|ref|NP_777598.3| FERM domain containing 3 [Homo sapiens]	Q2_P12188,Q2_P16918,Q2_P20401,Q2_P01545,Q2_P33301,Q2_P13451,Q2_P18483,Q2_P27458,Q2_P11702,Q2_P31500,Q2_P10158,Q2_P29919,Q2_P10269,Q2_P30047,Q2_P06485,Q2_P26065,Q2_P26161,Q2_P37267,Q2_P32003
18696	220	81	Q2_P18484	NO	C800702.1	PREDICTED: similar to aarF domain containing kinase 4 isoform 1 [Bos taurus] ||PREDICTED: similar to aarF domain containing kinase 4 isoform 3 [Bos taurus] ||PREDICTED: similar to Chaperone-activity of bc1 complex-like mitochondrial precursor (Chaperone-ABC1-like) [Danio rerio] ||PREDICTED: similar to Chaperone-activity of bc1 complex-like mitochondrial precursor (Chaperone-ABC1-like) [Danio reri…	TCCAAAGAATATTTGAACGTGTAAGACAGGCGGCAGATTTCATGCCAGCTAAACAAATGA	0	C800702.1	Smp_021330.1			Plus / Plus	Plus / Plus	Sense	CAZ29807.1	ABC1 family, putative [Schistosoma mansoni]	5.6e-77	NP_064632	>gi|34147522|ref|NP_064632.2| chaperone, ABC1 activity of bc1 complex like precursor [Homo sapiens]	Q2_P18484
25623	302	38	Q2_P18485	NO	C800703.1	PREDICTED: similar to Dynamin-1 (D100) (Dynamin brain) (B-dynamin) isoform 19 [Bos taurus] ||PREDICTED: similar to Dynamin-1 (D100) (Dynamin brain) (B-dynamin) isoform 17 [Bos taurus] ||PREDICTED: similar to Dynamin-1 (D100) (Dynamin brain) (B-dynamin) isoform 16 [Bos taurus] ||PREDICTED: similar to Dynamin-1 (D100) (Dynamin brain) (B-dynamin) isoform 13 [Bos taurus] ||PREDICTED: similar to Dynam…	CGTGAAAGAGAAATTCGTGCGAGAGATCAAATTGTACTATTAGTTGACATACAATTATCC	0	C800703.1	Smp_044920			Plus / Plus	Plus / Plus	Sense	CAZ32051.1	dynamin, putative [Schistosoma mansoni]	0.0	NP_001005336	>gi|56549117|ref|NP_001005336.1| dynamin 1 isoform 2 [Homo sapiens]	Q2_P01147,Q2_P06610,Q2_P18485
41834	493	14	Q2_P18486	NO	C800704.1	SJCHGC06657 protein [Schistosoma japonicum] ||PREDICTED: similar to RAB2 member RAS oncogene family [Strongylocentrotus purpuratus] ||Uncoordinated protein 108 [Caenorhabditis elegans] ref|NP_491233.1| UNCoordinated family member (unc-108) [Caenorhabditis elegans] ||RAB2 member RAS oncogene family [Mus musculus] emb|CAA64684.1| GTP-binding protein [Mus musculus] dbj|BAE22525.1| unnamed protein pr…	CCCTCCTCTAAATAAACAAATATCTTACTAGGAAATTCAGTAGGCGGAAATTAATTGTCG	0	C800704.1	Smp_071630			Plus / Plus	Plus / Plus	Sense	CAZ34591.1	rab-2,4,14, putative [Schistosoma mansoni]	1.9e-99	NP_002856	>gi|4506365|ref|NP_002856.1| RAB2A, member RAS oncogene family [Homo sapiens]
37810	445	70	Q2_P18487	NO	C800705.1	SJCHGC02678 protein [Schistosoma japonicum] ||SJCHGC00333 protein [Schistosoma japonicum] gb|AAX27010.1| unknown [Schistosoma japonicum] ||SJCHGC02390 protein [Schistosoma japonicum] ||unknown [Schistosoma japonicum] ||	TTTTAAACTCATCAATGGAAGCATTCAGACTTGAAAATCGTCGAGAATTTATGGGCCATG	0	C800705.1	Smp_075280.3			Plus / Plus	Plus / Plus	Sense	CAZ34944.1	expressed protein [Schistosoma mansoni]				Q2_P13155,Q2_P33006,Q2_P41014,Q2_P13849,Q2_P18487,Q2_P33721
9851	116	76	Q2_P18488	NO	C800706.1	SJCHGC06797 protein [Schistosoma japonicum] ||SJCHGC06798 protein [Schistosoma japonicum] ||SJCHGC06109 protein [Schistosoma japonicum] ||	CACGTTGAAGCCGATGAGGCTAAAGAAGAAGTTAAAGAATTATTGCAAACATCTAAATGA	0	C800706.1	Smp_024810			Plus / Plus	Plus / Plus	Sense	CAZ30157.1	Protein FAM82B, putative [Schistosoma mansoni]
27496	324	41	Q2_P18489	NO	C800707.1	PREDICTED: similar to CG5504-PC isoform C [Apis mellifera] ||CG5504-PC isoform C [Drosophila melanogaster] ref|NP_995931.1| CG5504-PC isoform C [Drosophila melanogaster] ||CG5504-PA isoform A [Drosophila melanogaster] ref|NP_524932.2| CG5504-PA isoform A [Drosophila melanogaster] ||CG5504-PB isoform B [Drosophila melanogaster] emb|CAA64540.1| Tid56 protein [Drosophila melanogaster] emb|CAA64538.1…	TTGTAGGCGATGCCATGGCACCGGCACCATTATTCGAAATCCTTGTCGAGAATGCGAAGG	0	C800707.1	Smp_096010			Plus / Plus	Plus / Plus	Sense	CAZ36727.1	DNAj homolog subfamily A member, putative [Schistosoma mansoni]	3e-110	NP_005138	>gi|205360838|ref|NP_005138.3| DnaJ (Hsp40) homolog, subfamily A, member 3 isoform 1 [Homo sapiens]	Q2_P18489,Q2_P05594,Q2_P24693,Q2_P24088,Q2_P04568,Q2_P25496
33556	395	66	Q2_P00225	NO	C800708.1	SJCHGC01085 protein [Schistosoma japonicum] ||PREDICTED: similar to DnaJ homolog subfamily A member 1 (Heat shock 40 kDa protein 4) (DnaJ protein homolog 2) (HSJ-2) (HSDJ) [Strongylocentrotus purpuratus] ||hypothetical protein [Pongo pygmaeus] ||Hypothetical protein LOC496421 [Xenopus tropicalis] ref|NP_001011012.1| hypothetical protein LOC496421 [Xenopus tropicalis] ||DnaJ (Hsp40) homolog subfam…	GTGCAGCAGATACAGACTACATGCAGTGCGTGCAAGGGTGAGAAAGAGATTATTGATCCA	0	C800708.1	Smp_035200.4			Plus / Minus	Plus / Minus	Sense	CAZ39215.1	hsp40, subfamily A, members 1,2,4, putative [Schistosoma mansoni]	4e-122	NP_001530	>gi|4504511|ref|NP_001530.1| DnaJ (Hsp40) homolog, subfamily A, member 1 [Homo sapiens]	Q2_P21452,Q2_P12410,Q2_P34276,Q2_P00225,Q2_P29500,Q2_P29408,Q2_P29751,Q2_P26268,Q2_P08460,Q2_P29398
22976	271	26	Q2_P18490	NO	C800709.1	hypothetical protein [Schistosoma japonicum] ||unknown [Schistosoma japonicum] ||unknown [Schistosoma japonicum] ||SJCHGC00355 protein [Schistosoma japonicum] ||	GGTGGATACGTTAATGAGGCGATCTAAATTTCATCAAGCTATACCATATTTAAAACGTTC	0	C800709.1	Smp_125260			Plus / Plus	Plus / Plus	Sense	CAZ28284.1	F8A1-like protein [Schistosoma mansoni]
36657	432	22	Q2_P00226	NO	C800710.1	SJCHGC05733 protein [Schistosoma japonicum] ||	GCTGCCATAAATGAAATTCAGTTCAAATTTAAGTGTTGTGGTACGCATGGTGAAAAATCA	0	C800710.1	Smp_138330			Plus / Minus	Plus / Minus	Sense	CAZ30668.1	expressed protein [Schistosoma mansoni]
40363	475	73	Q2_P18491	NO	C800711.1	PREDICTED: similar to RIKEN cDNA 2610018L09 [Gallus gallus] ||PREDICTED: similar to Zinc finger CSL domain containing 2 [Danio rerio] gb|AAH95696.1| Zgc:112231 protein [Danio rerio] ||zinc finger CSL domain containing 2 [Xenopus tropicalis] gb|AAH88958.1| LOC496356 protein [Xenopus laevis] ||Chain A Solution Structure Of The Mouse Desr1 ||PREDICTED: similar to zinc finger CSL domain containing 2 …	CCATTTCCATCGGTCTTCGGAAAACTAACTTTCACTCTATATTTTTCTACTTTTGCTTTC	0	C800711.1	Smp_100110			Plus / Plus	Plus / Plus	Sense	CAZ37062.1	expressed protein [Schistosoma mansoni]
16671	197	11	Q2_P18492	NO	C800712.1	SJCHGC02317 protein [Schistosoma japonicum] ||PREDICTED: similar to solute carrier family 39 (zinc transporter) member 13 isoform 4 [Bos taurus] ||hypothetical protein [Pongo pygmaeus] ||SI:bY184L24.1 (novel protein) [Danio rerio] ref|NP_001005306.1| hypothetical protein LOC368686 [Danio rerio] ||SLC39A13 protein [Homo sapiens] ||	AACAGTGAATATAAATAAATCCTCACCGGATTTAACCTAGGACCATCACATCTTGAGATG	0	C800712.1	Smp_166790			Plus / Plus	Plus / Plus	Sense	CAY17299.1	solute carrier family 39 (zinc transporter, putative [Schistosoma mansoni]	7.7e-40	NP_001121697	>gi|190014617|ref|NP_001121697.1| solute carrier family 39 (zinc transporter), member 13 isoform a [Homo sapiens]
32406	382	21	Q2_P18493	NO	C800713.1	SJCHGC09120 protein [Schistosoma japonicum] ||MGC82071 protein [Xenopus laevis] ||hypothetical protein LOC81576 [Homo sapiens] gb|AAK37425.1| putative SB115 protein [Homo sapiens] gb|AAH02905.1| Hypothetical protein MGC10471 [Homo sapiens] ||hypothetical protein MGC10471 [Bos taurus] ||hypothetical protein MGC10471 [Bos taurus] gb|AAX08712.1| hypothetical protein MGC10471 [Bos taurus] ||	AACCTTGCACGTTTGGTCAAGTGAAACAGATCTCATTCCATTCATGCTATGTGTGAGATC	0	C800713.1	Smp_164770			Plus / Plus	Plus / Plus	Sense	CAZ35269.1	apg5-related [Schistosoma mansoni]	1.5e-62	NP_004840	>gi|4757798|ref|NP_004840.1| APG5 autophagy 5-like [Homo sapiens]	Q2_P16101,Q2_P05216,Q2_P08643,Q2_P18493
12521	148	26	Q2_P18494	NO	C800714.1	SJCHGC04234 protein [Schistosoma japonicum] ||	CGACTGTATGTCAAATGTTTCTGGTGAGGTGTTTCCTCAAATATTTCTACTTTGCATTAT	0	C800714.1	Smp_104600.1			Plus / Plus	Plus / Plus	Sense						Q2_P14793,Q2_P14623,Q2_P16642,Q2_P36945,Q2_P18494
4050	48	55	Q2_P00227	NO	C800715.1	none	GCATTGAGTAGAGCTATGAGCTTGGATGAAACAAATCTTTCTGCACAAGTGAAATCATCT	0	C800715.1	Smp_138600			Plus / Minus	Plus / Minus	Sense	CAZ30722.1	conserved hypothetical protein [Schistosoma mansoni]				Q2_P15896,Q2_P36174,Q2_P18495,Q2_P11339,Q2_P39940,Q2_P31120,Q2_P00227
21217	250	52	Q2_P00228	NO	C800716.1	none	CTGCAGTGAATCAGATTCAGGAAGTGAAGAAGATATTGACATGGAGTAAAAGTTTTCTTT	0	C800716.1	Smp_029750			Plus / Minus	Plus / Minus	Sense	CAZ30654.1	expressed protein [Schistosoma mansoni]				Q2_P00228
11334	134	29	Q2_P18497	NO	C800717.1	SJCHGC04630 protein [Schistosoma japonicum] ||MGC81946 protein [Xenopus laevis] ||Mizf protein [Danio rerio] ||PREDICTED: similar to MBD2 (methyl-CpG-binding protein)-interacting zinc finger protein [Canis familiaris] ||hypothetical protein LOC496508 [Xenopus tropicalis] gb|AAH84488.1| Hypothetical LOC496508 [Xenopus tropicalis] ||	CGATTAGTATATTCAAACACCTCAGCAAACTATTCTTTTACTCCGTTTCATTCAGCTTTG	0	C800717.1	Smp_101310			Plus / Plus	Plus / Plus	Sense	CAY17943.1	Mizf protein, putative [Schistosoma mansoni]	2.9e-38	NP_945322	>gi|39725944|ref|NP_945322.1| MBD2 (methyl-CpG-binding protein)-interacting zinc finger protein [Homo sapiens]
5910	70	45	Q2_P18498	NO	C800718.1	SJCHGC04708 protein [Schistosoma japonicum] ||	GGATGACATCATTTTAAAACAGAGACTACCTATCGATCTATTTTTTGCGACACGTGATAT	0	C800718.1	Smp_088240			Plus / Plus	Plus / Plus	Sense	CAZ36099.1	expressed protein [Schistosoma mansoni]
1867	22	82	Q2_P18499	NO	C800719.1	PREDICTED: similar to ENSANGP00000017459 partial [Apis mellifera] ||PREDICTED: similar to phosphatidic acid phosphatase type 2 domain containing 2 [Canis familiaris] ||novel protein [Danio rerio] ||novel protein [Danio rerio] ||phosphatidic acid phosphatase type 2 domain containing 2 [Homo sapiens] emb|CAI41266.1| phosphatidic acid phosphatase type 2 domain containing 2 [Homo sapiens] ||	GTATGTTTGTGTGTGTGTATCTGTTAGTGTTTGTGCAATTACCTTCTCTGTCTTAATGAA	0	C800719.1	Smp_173120			Plus / Plus	Plus / Plus	Sense	CAY17589.1	phosphatidic acid phosphatase type 2-related [Schistosoma mansoni]
32724	385	84	Q2_P18500	NO	C800720.1	SJCHGC08725 protein [Schistosoma japonicum] ||	GTATACACATTGGTCCCGTATAGTCTAACAAAATCTCGAGTGTTTGATATTGAATTTTGG	0	C800720.1	Smp_143680			Plus / Plus	Plus / Plus	Sense	CAZ31550.1	laminin, putative [Schistosoma mansoni]	7.5e-21	NP_005550	>gi|38788416|ref|NP_005550.2| laminin, alpha 1 precursor [Homo sapiens]	Q2_P00958,Q2_P18500,Q2_P11795,Q2_P30559,Q2_P19895,Q2_P03850,Q2_P17400,Q2_P37820,Q2_P28346
24563	289	83	Q2_P18501	NO	C800721.1	SJCHGC08895 protein [Schistosoma japonicum] ||hypothetical protein [Gallus gallus] ref|NP_001006492.1| similar to ARP10 actin-related protein 10 homolog [Gallus gallus] ||PREDICTED: similar to ARP10 actin-related protein 10 homolog [Gallus gallus] ||PREDICTED: similar to Actin-related protein 10 (hARP11) isoform 2 [Canis familiaris] ||ARP10 actin-related protein 10 homolog [Mus musculus] gb|AAF05…	AACACAATGATCTTGAAAGGCAGGATACTACCCGCCAGTGATATCTAATATGATTTCGTG	0	C800721.1	Smp_093230			Plus / Plus	Plus / Plus	Sense	CAZ36521.1	actin-related protein 10, arp10 [Schistosoma mansoni]	3.4e-92	NP_060947	>gi|8923712|ref|NP_060947.1| uncharacterized hypothalamus protein HARP11 [Homo sapiens]	Q2_P18501,Q2_P10350,Q2_P30126
15467	182	82	Q2_P00229	NO	C800722.1	MGC83247 protein [Xenopus laevis] ||unnamed protein product [Tetraodon nigroviridis] ||PREDICTED: similar to mitogen-activated protein kinase kinase kinase kinase 5 kinase homologous to SPS1/STE20 [Gallus gallus] ||Mitogen-activated protein kinase kinase kinase kinase 5 [Danio rerio] gb|AAH55001.1| Mitogen-activated protein kinase kinase kinase kinase 5 [Danio rerio] ref|NP_956207.1| mitogen-acti…	ATCCACTCCTATCACTGGGTTCATAAAATCTATTAAGTATGATCCAGAACATTTCTCGCA	0	C800722.1	Smp_005190.1			Plus / Minus	Plus / Minus	Sense	CAZ28215.1	mitogen-activated protein kinase kinase kinase 3, mapkkk3, mekk3, putative [Schistosoma mansoni]	4.7e-55	NP_006566	>gi|14589909|ref|NP_006566.2| mitogen-activated protein kinase kinase kinase kinase 5 [Homo sapiens]	Q2_P00229,Q2_P31424,Q2_P16437,Q2_P36709,Q2_P11626
16100	190	35	Q2_P00230	NO	C800723.1	PREDICTED: similar to Alpha-1 6-mannosylglycoprotein 6-beta-N-acetylglucosaminyltransferase V (Mannoside acetylglucosaminyltransferase 5) (Alpha-mannoside beta-1 6-N-acetylglucosaminyltransferase) (N-acetylglucosaminyl-transferase V) (GNT-V) (GlcNAc-T V)... [Bos taurus] ||Alpha-1 6-mannosyl-glycoprotein 6-beta-N-acetylglucosaminyltransferase [Rattus norvegicus] gb|AAA41665.1| N-acetylglucosaminyl…	GAAAGTTTCTGTCCACAATTGGATAGCAGAAAATTTATGAAACGTTATAGTGAAGCTCAG	0	C800723.1	Smp_040510			Plus / Minus	Plus / Minus	Sense	CAZ31642.1	alpha-mannoside beta-1,6-n-acetylglucosaminyltransferase, putative [Schistosoma mansoni]	5e-118	NP_002401	>gi|4505167|ref|NP_002401.1| N-acetylglucosaminyltransferase V [Homo sapiens]	Q2_P00230
42209	497	49	Q2_P18502	NO	C800724.1	SJCHGC03471 protein [Schistosoma japonicum] ||GA17439-PA [Drosophila pseudoobscura] ||CG3420-PA [Drosophila melanogaster] ref|NP_610234.3| CG3420-PA [Drosophila melanogaster] gb|AAL48998.1| RE40412p [Drosophila melanogaster] ||ENSANGP00000013261 [Anopheles gambiae str. PEST] ref|XP_314297.2| ENSANGP00000013261 [Anopheles gambiae str. PEST] ||PREDICTED: similar to ENSANGP00000013261 [Mus musculus]…	TAAATATCGACTCATACTTAGTTAAGTGGAGTTGGCTCACACGCCTTCTCCATTGCGCGT	0	C800724.1	Smp_157700			Plus / Plus	Plus / Plus	Sense	CAZ34069.1	conserved hypothetical protein [Schistosoma mansoni]	4.6e-21	NP_000909	>gi|20070125|ref|NP_000909.2| prolyl 4-hydroxylase, beta subunit precursor [Homo sapiens]	Q2_P37187,Q2_P16848,Q2_P41041,Q2_P09902,Q2_P29646,Q2_P18502
41967	494	62	Q2_P00231	NO	C800725.1	SJCHGC05495 protein [Schistosoma japonicum] ||	GGTAGATGGTTCTCCTTTGAGTTAGTAGTGTTTATGTTCTACATTCATTACTTCTATGCT	0	C800725.1	Smp_145370			Plus / Minus	Plus / Minus	Sense	CAZ31867.1	hypothetical protein [Schistosoma mansoni]				Q2_P00231
15905	188	10	Q2_P18503	NO	C800726.1	SJCHGC03679 protein [Schistosoma japonicum] ||component of oligomeric golgi complex 6 [Homo sapiens] emb|CAI16936.1| component of oligomeric golgi complex 6 [Homo sapiens] ||component of oligomeric golgi complex 6 [Homo sapiens] gb|AAH51723.1| Component of oligomeric golgi complex 6 [Homo sapiens] ||component of oligomeric golgi complex 6 [Homo sapiens] sp|Q9Y2V7|COG6_HUMAN Conserved oligomeric G…	TCGAATTCCACTGTCAGGAATCATTCTGTTGGCACAGTTTATACGATGGACATAAGAGAA	0	C800726.1	Smp_141220			Plus / Plus	Plus / Plus	Sense	CAZ39230.1	component of oligomeric golgi complex, putative [Schistosoma mansoni]	7.1e-77	NP_065802	>gi|33457344|ref|NP_065802.1| component of oligomeric golgi complex 6 isoform 1 [Homo sapiens]	Q2_P18503,Q2_P30649,Q2_P17566,Q2_P38657,Q2_P38030,Q2_P10853
13142	155	52	Q2_P18504	NO	C800727.1	SJCHGC01815 protein [Schistosoma japonicum] ||unknown [Schistosoma japonicum] ||jumonji domain containing 4 [Mus musculus] emb|CAI25405.1| novel protein [Mus musculus] emb|CAI25876.1| novel protein [Mus musculus] emb|CAI24558.1| novel protein [Mus musculus] dbj|BAE26409.1| unnamed protein product [Mus musculus] dbj|BAC37541.1| unnamed protein product [Mus musculus] dbj|BAC29907.1| unnamed protein…	GCTGTTGAAGCGTCAACTAAAGACGTATCTTCTATTCCTGGATGGCATGAAGAGTGTCAG	0	C800727.1	Smp_147870			Plus / Plus	Plus / Plus	Sense	CAZ32354.1	protein phosphatase 2C, putative [Schistosoma mansoni]	6.1e-73	NP_110395	>gi|13540531|ref|NP_110395.1| integrin-linked kinase-associated protein phosphatase 2C [Homo sapiens]	Q2_P20089,Q2_P35684,Q2_P05690,Q2_P18504,Q2_P31826
9161	108	66	Q2_P18505	NO	C800728.1	labial-like protein [Schistosoma mansoni] ||SJCHGC08732 protein [Schistosoma japonicum] ||Lox7 [Helobdella triserialis] ||transcription factor protein [Ciona intestinalis] ||labial protein [Drosophila melanogaster] ||	GGTAGTACTTATCATGAAATGGAAGAGAATACAACATCAATAACAACTAGTCCTCCATCA	0	C800728.1	Smp_156360			Plus / Plus	Plus / Plus	Sense	CAZ33852.1	pyruvate kinase, putative [Schistosoma mansoni]	3.3e-96	NP_002645	>gi|33286418|ref|NP_002645.3| pyruvate kinase, muscle isoform M2 [Homo sapiens]	Q2_P32228,Q2_P21578,Q2_P31994,Q2_P18505,Q2_P23533,Q2_P17800,Q2_P38275,Q2_P17801,Q2_P38276,Q2_P40613
4248	50	83	Q2_P18506	NO	C800729.1	SJCHGC06031 protein [Schistosoma japonicum] ||SJCHGC01371 protein [Schistosoma japonicum] ||actin-binding and severin family group-like protein [Echinococcus granulosus] ||actin-filament fragmenting protein [Echinococcus granulosus] ||actin-filament fragmenting protein [Echinococcus granulosus] sp|Q24800|SEVE_ECHGR Severin ||	CGAACGAGCATGGGACAGAGATAGAAGTACAAGTTATCTACAGTAAAATACAAACAAAAA	0	C800729.1	Smp_008640			Plus / Plus	Plus / Plus	Sense	CAZ28572.1	gelsolin, putative [Schistosoma mansoni]	5.8e-27	NP_006567	>gi|17572824|ref|NP_006567.2| advillin [Homo sapiens]	Q2_P18506,Q2_P39720,Q2_P08277,Q2_P27968
36888	434	83	Q2_P18507	NO	C800731.1	hypothetical protein T04C9 similar to GenBank Accession Number T25859 hypothetical protein T04C9 [Schistosoma japonicum] ||SJCHGC05939 protein [Schistosoma japonicum] ||PREDICTED: similar to MGC14161 protein [Danio rerio] ||PREDICTED: similar to RIKEN cDNA A930004K21 [Danio rerio] ||hypothetical protein LOC84978 isoform 1 [Homo sapiens] gb|AAH53647.1| Hypothetical protein LOC84978 isoform 1 [Homo…	TTGGTCGTTTAAGAGCAGAAGCATCGAAGATCTATGAATTGGCAGCATACGCCATACAAG	0	C800731.1	Smp_194400			Plus / Plus	Plus / Plus	Sense	CAZ39078.1	expressed protein [Schistosoma mansoni]				Q2_P18507,Q2_P36166,Q2_P01135,Q2_P19843,Q2_P14651
830	10	65	Q2_P00233	NO	C800732.1	SJCHGC06618 protein [Schistosoma japonicum] ||similar to GenBank Accession Number AF108214 eukaryotic translation initiation factor 3 p42 subunit in Mus musculus [Schistosoma japonicum] ||EIF3S4 [Homo sapiens] ||eukaryotic translation initiation factor 3 subunit 4 delta 44kDa [Homo sapiens] gb|AAH00733.1| Eukaryotic translation initiation factor 3 subunit 4 delta 44kDa [Homo sapiens] gb|AAH08469.…	CATTTGGTCACGTAATGCGTATTTACCCAGCAAAAGATAAATTAACACAACAAAATAGGG	0	C800732.1	Smp_192360			Plus / Minus	Plus / Minus	Sense	CAY19053.1	expressed protein [Schistosoma mansoni]	6.1e-35	NP_003746	>gi|49472822|ref|NP_003746.2| eukaryotic translation initiation factor 3, subunit 4 delta, 44kDa [Homo sapiens]	Q2_P00233
9321	110	56	Q2_P18508	NO	C800733.1	SJCHGC04769 protein [Schistosoma japonicum] ||	GATTCGTGTTCTGTAGATGAATTTTTGAAGGTACCGAGATCTTATGCAGAACAGCCGCCC	0	C800733.1	Smp_133920			Plus / Plus	Plus / Plus	Sense	CAZ29837.1	glutamate receptor, AMPA, putative [Schistosoma mansoni]	4.5e-29	NP_060021	>gi|55770852|ref|NP_060021.1| glutamate receptor, ionotropic, delta 1 precursor [Homo sapiens]	Q2_P18508,Q2_P33365,Q2_P13510,Q2_P21904,Q2_P29951,Q2_P16788,Q2_P09706,Q2_P08645,Q2_P37119,Q2_P16448,Q2_P10184
5892	70	27	Q2_P18510	NO	C800735.1	SJCHGC05776 protein [Schistosoma japonicum] ||ENSANGP00000010808 [Anopheles gambiae str. PEST] ref|XP_312237.2| ENSANGP00000010808 [Anopheles gambiae str. PEST] ||GA15892-PA [Drosophila pseudoobscura] ||LP06206p [Drosophila melanogaster] ||CG3051-PC isoform C [Drosophila melanogaster] gb|AAN09043.1| CG3051-PB isoform B [Drosophila melanogaster] gb|AAF45614.1| CG3051-PA isoform A [Drosophila melan…	GTATGCATTACTATGTGGTACACTTCCATTTGATGATGAACACATACCTACACTTTTCAA	0	C800735.1	Smp_142990			Plus / Plus	Plus / Plus	Sense	CAZ31426.1	serine/threonine kinase [Schistosoma mansoni]	5e-171	NP_006243	>gi|46877068|ref|NP_006243.2| AMP-activated protein kinase alpha 2 catalytic subunit [Homo sapiens]	Q2_P18510,Q2_P19171,Q2_P32289,Q2_P32742,Q2_P12917
33633	396	58	Q2_P00234	NO	C800736.1	SJCHGC07625 protein [Schistosoma japonicum] ||PREDICTED: similar to CG3149-PA partial [Strongylocentrotus purpuratus] ||PREDICTED: similar to CG3149-PA partial [Strongylocentrotus purpuratus] ||PREDICTED: similar to CG3149-PA [Danio rerio] ||unnamed protein product [Tetraodon nigroviridis] ||	GACTTTCGGCGTGTTATCAAACTGTGAAATCGGAAAATTCTCAAATATTTCCTTATTGTC	0	C800736.1	Smp_131100			Plus / Minus	Plus / Minus	Sense	CAZ29337.1	endoplasmic reticulum multispan transmembrane protein-related [Schistosoma mansoni]	3.7e-41	NP_443091	>gi|16418361|ref|NP_443091.1| RFT1 homolog [Homo sapiens]	Q2_P00234,Q2_P29700,Q2_P09949
22955	271	5	Q2_P18511	NO	C800737.1	Sh23 [Schistosoma haematobium] sp|Q26499|IM23_SCHHA 23 kDa integral membrane protein (Sh23) ||integral membrane protein 23 ||23K integral membrane protein - fluke (Schistosoma mansoni) sp|P19331|IM23_SCHMA 23 kDa integral membrane protein (SM23) gb|AAA29900.1| integral membrane protein ||23K integral membrane protein - fluke (Schistosoma japonicum) sp|P27591|IM23_SCHJA 23 kDa integral membrane pr…	AGTGCTATAAACAATCCAACCAAAGAGGTAACTCTATTCATGGATTTGGTTCAATCATCA	0	C800737.1	Smp_075720			Plus / Plus	Plus / Plus	Sense	CAZ34990.1	Leukocyte surface antigen CD53 (Cell surface glycoprotein CD53), putative [Schistosoma mansoni]				Q2_P18511
10444	123	74	Q2_P18512	NO	C800738.1	PREDICTED: similar to RIKEN cDNA 0610009E20 [Gallus gallus] ||hypothetical protein LOC66048 [Mus musculus] emb|CAI24793.1| novel protein [Mus musculus] gb|AAH22104.1| RIKEN cDNA 0610009E20 [Mus musculus] gb|AAH01409.1| Hypothetical protein MGC2963 [Homo sapiens] dbj|BAB22636.1| unnamed protein product [Mus musculus] dbj|BAB23194.1| unnamed protein product [Mus musculus] ref|XP_213394.1| PREDICTED…	GAGGGGTTTTCGGAGAACTAACTACTTATATTTTATTTTGGACATTTATCTATGGCATGG	0	C800738.1	Smp_068580.1			Plus / Plus	Plus / Plus	Sense	CAZ34315.1	expressed protein [Schistosoma mansoni]	9.3e-28	NP_112588	>gi|13775220|ref|NP_112588.1| transmembrane protein 93 [Homo sapiens]	Q2_P18512
24370	287	60	Q2_P18513	NO	C800739.1	SJCHGC04743 protein [Schistosoma japonicum] ||	GTTGCTGACTTCTACTTCCTGCTTAGAAATTTCAGTTCATTGGAGAAAATGTATGGGTGA	0	C800739.1	Smp_033620			Plus / Plus	Plus / Plus	Sense	CAZ31037.1	conserved hypothetical protein [Schistosoma mansoni]				Q2_P18513
31445	370	80	Q2_P18514	NO	C800740.1	high voltage-activated calcium channel Cav1 [Schistosoma mansoni] ||voltage-dependent L-type calcium channel alpha-1 subunit isoform a [Lymnaea stagnalis] ||voltage-dependent L-type calcium channel alpha-1 subunit isoform b [Lymnaea stagnalis] ||Ca channel:SUBUNIT=alpha1 ||voltage dependent calcium channel alpha1 subunit [Musca domestica] sp|Q25452|CAC1M_MUSDO Muscle calcium channel alpha-1 subun…	CGGACCACATCATCTGGATGAATTCATTACAAAATGGGCAGATTATGATCCAGAAGCAAA	0	C800740.1	Smp_020270			Plus / Plus	Plus / Plus	Sense	CAZ29714.1	high voltage-activated calcium channel Cav1 [Schistosoma mansoni]	2.7e-22	NP_001122311	>gi|192807298|ref|NP_001122311.1| calcium channel, voltage-dependent, L type, alpha 1D subunit isoform c [Homo sapiens]	Q2_P18514,Q2_P18889,Q2_P16657,Q2_P19203,Q2_P40872,Q2_P08701,Q2_P06321,Q2_P36963
15836	187	26	Q2_P18515	NO	C800741.1	SJCHGC00301 protein [Schistosoma japonicum] gb|AAA29918.1| alpha tubulin ||alpha-1 tubulin [Hirudo medicinalis] gb|AAB07727.1| alpha-1 tubulin [Hirudo medicinalis] ||unknown [Schistosoma japonicum] ||unknown [Schistosoma japonicum] ||alpha-2 tubulin [Hirudo medicinalis] gb|AAB07728.1| alpha-2 tubulin [Hirudo medicinalis] ||	GTGAAGAGTATTAGGTTTCATTTCTTTTGAGTGTTATGTTTCTGGTTGTTACTCGTTCCT	0	C800741.1	Smp_090120.1			Plus / Plus	Plus / Plus	Sense	CAZ36272.1	alpha tubulin, putative [Schistosoma mansoni]	0.0	NP_005992	>gi|17921993|ref|NP_005992.1| tubulin, alpha 3c [Homo sapiens]	Q2_P18515,Q2_P00001_2,Q2_P00001_1,Q2_P00001_6,Q2_P00001_5,Q2_P00001_4,Q2_P00001_3
16575	195	85	Q2_P18516	NO	C800742.1	SJCHGC01079 protein [Schistosoma japonicum] ||	CGAATCTGACCGAGCACTGACGCCCGACTCGAATTGTGATTTTTGTGGAATTACCCTTCC	0	C800742.1	Smp_097090.2			Plus / Plus	Plus / Plus	Sense	CAZ36839.1	expressed protein [Schistosoma mansoni]				Q2_P19553,Q2_P18516
12099	143	29	Q2_P18517	NO	C800743.1	PL10b protein [Platynereis dumerilii] ||PL10a protein [Platynereis dumerilii] ||PL10-related protein CnPL10 [Hydra magnipapillata] ||PREDICTED: similar to CG9748-PA [Apis mellifera] ||PREDICTED: similar to pl10 [Strongylocentrotus purpuratus] ||	CTACTTGGAAACTGTTCATTGTCATTCCCTATTACTAGTAATCCTAGACATCTGCAAAAT	0	C800743.1	Smp_068440			Plus / Plus	Plus / Plus	Sense	CAZ34307.1	DEAD box ATP-dependent RNA helicase, putative [Schistosoma mansoni]	5e-152	NP_001347	>gi|87196351|ref|NP_001347.3| DEAD/H (Asp-Glu-Ala-Asp/His) box polypeptide 3 [Homo sapiens]	Q2_P18517,Q2_P12403,Q2_P33626,Q2_P10728,Q2_P28271,Q2_P30517,Q2_P13754
16924	200	9	Q2_P18518	NO	C800744.1	PREDICTED: similar to copine family member [Strongylocentrotus purpuratus] ||PREDICTED: similar to copine VIII partial [Strongylocentrotus purpuratus] ||PREDICTED: similar to copine VIII [Strongylocentrotus purpuratus] ||similar to copine V [Danio rerio] gb|AAH54636.1| Similar to copine V [Danio rerio] ||Copine V [Mus musculus] dbj|BAC31750.1| unnamed protein product [Mus musculus] ref|NP_694806.…	TCCAAACTGGGAGCAGATGATTGTACCACTAAGGCTTTTATGTAATGGAGATCATGACAG	0	C800744.1	Smp_060480			Plus / Plus	Plus / Plus	Sense	CAZ33585.1	copine, putative [Schistosoma mansoni]	5.4e-88	NP_705899	>gi|88703066|ref|NP_705899.2| copine-like protein [Homo sapiens]	Q2_P09672,Q2_P18518
35296	416	21	Q2_P18519	NO	C800745.1	unnamed protein product [Mus musculus] ||mitochondrial ribosomal protein L49 [Mus musculus] gb|AAH28956.1| Mitochondrial ribosomal protein L49 [Mus musculus] dbj|BAE29793.1| unnamed protein product [Mus musculus] dbj|BAE29667.1| unnamed protein product [Mus musculus] dbj|BAC25678.1| unnamed protein product [Mus musculus] dbj|BAB25205.1| unnamed protein product [Mus musculus] dbj|BAB29520.1| unnam…	GATCTCCGGACGCTTCTTCAACCGAAATGTGAAGCTGGACTGTTTCTTTGTCAAGCAGAT	0	C800745.1	Smp_024030			Plus / Plus	Plus / Plus	Sense	CAZ30072.1	expressed protein [Schistosoma mansoni]	6.4e-21	NP_004918	>gi|4826649|ref|NP_004918.1| mitochondrial ribosomal protein L49 [Homo sapiens]	Q2_P18519,Q2_P32707,Q2_P26311,Q2_P06718,Q2_P12885
28063	331	13	Q2_P18520	NO	C800747.1	putative U-snRNP-associated cyclophilin [Echinococcus multilocularis] ||PREDICTED: similar to peptidyl prolyl isomerase H cyclophilin H rotamase H [Gallus gallus] ||peptidyl prolyl isomerase H [Mus musculus] ref|XP_591101.2| PREDICTED: similar to peptidyl prolyl isomerase H isoform 1 [Bos taurus] ref|XP_878663.1| PREDICTED: similar to peptidyl prolyl isomerase H isoform 4 [Bos taurus] ref|XP_8695…	CAGTTCTTCATTACTTGTGCCCCTTGTGACTTTCTCGATGGGAAACATGTGGTTTTCGGT	0	C800747.1	Smp_173280			Plus / Plus	Plus / Plus	Sense	CAZ36536.1	peptidyl-prolyl cis-trans isomerase h, ppih, putative [Schistosoma mansoni]	7.5e-68	NP_006338	>gi|5454154|ref|NP_006338.1| peptidylprolyl isomerase H [Homo sapiens]	Q2_P18520,Q2_P01805,Q2_P22385,Q2_P03140,Q2_P15512,Q2_P11670,Q2_P01128,Q2_P19831,Q2_P31345,Q2_P11549,Q2_P35462
40216	474	11	Q2_P00235	NO	C800748.1	SJCHGC02792 protein [Schistosoma japonicum] ||ADP/ATP carrier [Neocallimastix frontalis] gb|AAK59378.1| ADP/ATP carrier [Neocallimastix patriciarum] gb|AAL79525.1| ADP/ATP carrier [Neocallimastix patriciarum] ||hydrogenosomal ATP/ADP carrier [Neocallimastix frontalis] ||ADP ATP carrier protein 1 mitochondrial precursor putative [Trypanosoma cruzi] gb|EAN97607.1| ADP ATP carrier protein 1 mitochon…	GTAAAGCTAGCATGTAATTTAGTTTCCGAAGATTACTAGAAAGTTGATTTTCGTTGGGGA	0	C800748.1	Smp_079220			Plus / Minus	Plus / Minus	Sense	CAZ35281.1	ADP,ATP carrier protein, putative [Schistosoma mansoni]	4.9e-28	NP_112581	>gi|13775208|ref|NP_112581.1| solute carrier family 25 (mitochondrial carrier; adenine nucleotide translocator), member 31 [Homo sapiens]
31905	376	30	Q2_P18521	NO	C800749.1	SJCHGC08768 protein [Schistosoma japonicum] ||	CGTGACTTCGTTGTATTATTTCTTGTGACTGTGCATAGTTGTGCTTTGTAATCAACTAAT	0	C800749.1	Smp_098560.3			Plus / Plus	Plus / Plus	Sense
28042	330	77	Q2_P18522	NO	C800750.1	unnamed protein product [Tetraodon nigroviridis] ||Hypothetical protein LOC550465 [Danio rerio] ref|NP_001017768.1| hypothetical protein LOC550465 [Danio rerio] ||PREDICTED: similar to COP9 signalosome subunit 6 isoform 6 [Bos taurus] ||MGC81070 protein [Xenopus laevis] sp|Q6NUC2|CSN6_XENLA COP9 signalosome complex subunit 6 (Signalosome subunit 6) ||hypothetical protein [Pongo pygmaeus] ||	AAATGACAATTTGTACCGTCAAGCGAAATGATGTGTGTCTGACAGCACTGCTTGCCAGCA	0	C800750.1	Smp_126690			Plus / Plus	Plus / Plus	Sense	CAZ28550.1	COP9 signalosome subunit 6 (M67 family) [Schistosoma mansoni]	3.7e-38	NP_006824	>gi|34147637|ref|NP_006824.2| COP9 signalosome subunit 6 [Homo sapiens]
26345	310	80	Q2_P18523	NO	C800751.1	SJCHGC06011 protein [Schistosoma japonicum] ||SJCHGC06042 protein [Schistosoma japonicum] ||PREDICTED: similar to leucine-rich repeat LGI family member 2 leucine-rich glioma inactivated 2 LGI1-like protein 2 [Gallus gallus] ||PREDICTED: similar to CG14868-PA partial [Bos taurus] ||PREDICTED: similar to hypothetical protein DKFZp761B107 [Mus musculus] ||	CAAATCATATTACTTCGAGACATTGTCATTTGACATCGCTGTGATATTTGTATGCTCGTG	0	C800751.1	Smp_083380.1			Plus / Plus	Plus / Plus	Sense	CAZ35670.1	expressed protein [Schistosoma mansoni]	1.5e-36	NP_001124198	>gi|195539368|ref|NP_001124198.1| coiled-coil domain containing 149 isoform 2 [Homo sapiens]
18126	214	21	Q2_P18524	NO	C800752.1	SJCHGC02650 protein [Schistosoma japonicum] ||hypothetical protein UM05713.1 [Ustilago maydis 521] gb|EAK85968.1| hypothetical protein UM05713.1 [Ustilago maydis 521] ||	AGATATTGACTGGTTCTGGCTTGTTTCAGCTCCTACTTTATTCCATTTCATACGTGAGGT	0	C800752.1	Smp_040720.4			Plus / Plus	Plus / Plus	Sense	CAZ31665.1	expressed protein [Schistosoma mansoni]				Q2_P18524,Q2_P05218,Q2_P29188,Q2_P09446
18087	213	67	Q2_P00236	NO	C800753.1	similar to NM_019693 HLA-B associated transcript 1 in Homo sapiens [Schistosoma japonicum] ||unknown [Branchiostoma floridae] ||HLA-B-associated transcript 1A [Rattus norvegicus] ref|NP_062667.1| HLA-B-associated transcript 1A [Mus musculus] emb|CAC85694.1| putative RNA helicase [Rattus norvegicus] gb|AAH24859.1| HLA-B-associated transcript 1A [Mus musculus] gb|AAP91686.1| HLA-B associated transc…	TAGATAGTTTCGACTACTCTATTTTAGAGACATCCGACACGATATTTATGAGGTGGAAAG	0	C800753.1	Smp_003660			Plus / Minus	Plus / Minus	Sense	CAZ28058.1	DEAD box ATP-dependent RNA helicase, putative [Schistosoma mansoni]	0.0	NP_004631	>gi|4758112|ref|NP_004631.1| HLA-B associated transcript 1 [Homo sapiens]	Q2_P00236
27645	326	20	Q2_P18525	NO	C800754.1	similar to GenBank Accession Number U07345 preprocathepsin L in Schistosoma mansoni [Schistosoma japonicum] ||SJCHGC00511 protein [Schistosoma japonicum] ||preprocathepsin L sp|Q26534|CATL_SCHMA Cathepsin L precursor (SMCL1) prf||2106314A cathepsin L ||cathepsin L1 [Schistosoma japonicum] ||cysteine proteinase PWCP1 [Paragonimus westermani] ||	CAAGGAATGTGTGGCTCTTGTTGGGCATTCTCAACCACTGGTAATGTTGAAAGTCAGTGG	0	C800754.1	Smp_034410.1			Plus / Plus	Plus / Plus	Sense	CAZ31125.1	cathepsin F (C01 family) [Schistosoma mansoni]	3.8e-79	NP_003784	>gi|6042196|ref|NP_003784.2| cathepsin F [Homo sapiens]	Q2_P18525
24078	284	23	Q2_P18527	NO	C800756.1	SJCHGC04162 protein [Schistosoma japonicum] ||hypothetical protein LOC394564 [Xenopus tropicalis] gb|AAH61419.1| Hypothetical protein MGC76017 [Xenopus tropicalis] ||SEC13-like 1 [Rattus norvegicus] ref|NP_001006979.1| SEC13-like 1 [Rattus norvegicus] ||Sec13l1-prov protein [Xenopus laevis] ||Unknown (protein for MGC:80813) [Xenopus laevis] ||	CATCAATGCTTTTTATTTCGAATTGTAATCTATGCATTCTGCCTTTCTTTGCTTCCACTG	0	C800756.1	Smp_090870			Plus / Plus	Plus / Plus	Sense	CAZ36339.1	protein transport protein Sec13, putative [Schistosoma mansoni]	4e-102	NP_899195	>gi|34335134|ref|NP_899195.1| SEC13 protein isoform 1 [Homo sapiens]
43806	516	31	Q2_P18528	NO	C800757.1	SJCHGC06987 protein [Schistosoma japonicum] ||TGF beta-inducible nuclear protein 1 [Homo sapiens] ref|NP_055701.1| TGF beta-inducible nuclear protein 1 [Homo sapiens] gb|AAK53761.1| hairy cell leukemia protein 1 [Homo sapiens] gb|AAG43048.1| TGF beta inducible nuclear protein TINP1 [Homo sapiens] emb|CAA10008.1| hypothetical protein [Homo sapiens] sp|O95478|TIP1_HUMAN TGF beta-inducible nuclear p…	GCTTCCTATAATTGGAGTAAAGAAAAATCCAAGTTCACCAATGTATACTACCTTAGGTGT	0	C800757.1	Smp_054120			Plus / Plus	Plus / Plus	Sense	CAZ32938.1	Ribosome biogenesis protein NSA2 homologue [Schistosoma mansoni]	3e-108	NP_055701	>gi|7662677|ref|NP_055701.1| TGF beta-inducible nuclear protein 1 [Homo sapiens]	Q2_P18528,Q2_P30640,Q2_P10844
31566	372	31	Q2_P18529	NO	C800758.1	SJCHGC09592 protein [Schistosoma japonicum] ||PREDICTED: similar to peptidylglycine alpha-amidating monooxygenase isoform d preproprotein peptidyl alpha-amidating enzyme peptidylglycine 2-hydroxylase peptidylglycine alpha-hydroxylating monooxygenase peptidyl-alpha-hydroxyglycine alpha-amidating lyas... [Gallus gallus] ||GA11425-PA [Drosophila pseudoobscura] ||PREDICTED: similar to CG12130-PA [Api…	TAACACTTGGTGAACGCTTTAAACCTGGTTCAAGCAAAAATCAATTTTGTAAACCAACGG	0	C800758.1	Smp_010820			Plus / Plus	Plus / Plus	Sense	CAZ28771.1	peptidyl-glycine alpha-amidating monooxygenase, putative [Schistosoma mansoni]	1e-48	NP_620121	>gi|21070974|ref|NP_620121.1| peptidylglycine alpha-amidating monooxygenase isoform b preproprotein [Homo sapiens]	Q2_P17987,Q2_P31683,Q2_P18529
5051	60	36	Q2_P18530	NO	C800759.1	PREDICTED: similar to GA15475-PA [Apis mellifera] ||Shaw potassium channel Kv3.1a [Aplysia californica] ||Shaw potassium channel ||ENSANGP00000022006 [Anopheles gambiae str. PEST] ref|XP_317268.2| ENSANGP00000022006 [Anopheles gambiae str. PEST] ||CG2822-PB isoform B [Drosophila melanogaster] ref|NP_722937.2| CG2822-PB isoform B [Drosophila melanogaster] gb|AAL49097.1| RE54962p [Drosophila melano…	CGGAGAACTGAAGAAGAATTATATTCAAAATTTGGTTGGGATGATGCATATCAATCTGGT	0	C800759.1	Smp_163090.1			Plus / Plus	Plus / Plus	Sense	CAZ35010.1	voltage-gated potassium channel, putative [Schistosoma mansoni]	1.4e-98	NP_004968	>gi|24497460|ref|NP_004968.2| Shaw-related voltage-gated potassium channel protein 3 [Homo sapiens]	Q2_P18530
9450	112	15	Q2_P00238	NO	C800762.1	PREDICTED: similar to ATP-NAD kinase (2M349) [Strongylocentrotus purpuratus] ||PREDICTED: similar to ATP-NAD kinase (2M349) [Strongylocentrotus purpuratus] ||PREDICTED: similar to hypothetical protein FLJ30596 [Gallus gallus] ||	CTTTTGGGGGTACGAATTCAGTTCATCAAACACCAGTGTTGGTTCTAATTATTTGTAAAA	0	C800762.1	Smp_126160			Plus / Minus	Plus / Minus	Sense	CAZ28451.1	poly(p)/ATP NAD kinase, putative [Schistosoma mansoni]	2.4e-48	NP_001078880	>gi|146134341|ref|NP_001078880.1| hypothetical protein LOC133686 isoform 1 [Homo sapiens]
43087	507	77	Q2_P00239	NO	C800763.1	SJCHGC05798 protein [Schistosoma japonicum] ||PREDICTED: similar to WD repeat domain 37 partial [Strongylocentrotus purpuratus] ||PREDICTED: similar to ENSANGP00000013024 [Apis mellifera] ||WD repeat domain 37 [Mus musculus] dbj|BAC29346.1| unnamed protein product [Mus musculus] sp|Q8CBE3|WDR37_MOUSE WD-repeat protein 37 ||WD repeat domain 37 [Mus musculus] ||	CTCGTTACTATTTCGTTGTTAGTTGTGTAGAATATTTTCACTAGGAGTGATCAATTCAGG	0	C800763.1	Smp_144870			Plus / Minus	Plus / Minus	Sense	CAZ31754.1	expressed protein [Schistosoma mansoni]	1.4e-35	NP_054742	>gi|41281564|ref|NP_054742.2| WD repeat domain 37 [Homo sapiens]
5961	71	11	Q2_P00240	NO	C800764.1	PREDICTED: similar to PRP39 pre-mRNA processing factor 39 homolog [Strongylocentrotus purpuratus] ||Prpf39-prov protein [Xenopus tropicalis] ||unnamed protein product [Tetraodon nigroviridis] ||novel protein similar to pre-mRNA processing proteins [Danio rerio] ref|NP_001004520.1| PRP39 pre-mRNA processing factor 39 homolog [Danio rerio] ||PRP39 pre-mRNA processing factor 39 homolog [Homo sapiens…	AAAGTAACGATAACCTCACTGAGAAATCAGATGAAGCTGCCAAATCTCCTAGGGCTACGA	0	C800764.1	Smp_170570			Plus / Minus	Plus / Minus	Sense	CAZ36160.1	pre-mRNA processing protein prp39-related [Schistosoma mansoni]	1e-80	NP_060392	>gi|156938331|ref|NP_060392.3| PRP39 pre-mRNA processing factor 39 homolog [Homo sapiens]	Q2_P00627,Q2_P25614,Q2_P00240
4284	51	34	Q2_P18533	NO	C800765.1	PREDICTED: similar to CG5986-PA [Strongylocentrotus purpuratus] ||PREDICTED: similar to CG5986-PA [Apis mellifera] ||hypothetical protein LOC208768 [Mus musculus] gb|AAH31781.1| CDNA sequence BC031781 [Mus musculus] ||hypothetical protein LOC550448 [Danio rerio] gb|AAH93198.1| Hypothetical protein LOC550448 [Danio rerio] ||Zgc:112095 protein [Danio rerio] ||	ATACCGAAGCCACAACGGACTCTACAGGATTAATTAACAGTGTTAAAACAGATGCAATTG	0	C800765.1	Smp_161960			Plus / Plus	Plus / Plus	Sense	CAZ34766.1	expressed protein [Schistosoma mansoni]	7.2e-26	NP_689821	>gi|148664216|ref|NP_689821.3| hypothetical protein LOC163859 [Homo sapiens]	Q2_P18533,Q2_P30152,Q2_P37442,Q2_P17082,Q2_P10374
38472	453	52	Q2_P00241	NO	C800766.1	SJCHGC09077 protein [Schistosoma japonicum] ||	GTTGGAGGGGAGGTGGAGTAGGGATTTCTCTATTTCTTTACATATAGTTTATAGAAATAT	0	C800766.1	Smp_125650			Plus / Minus	Plus / Minus	Sense	CAZ28348.1	inositol polyphosphate multikinase, putative [Schistosoma mansoni]	8.3e-35	NP_689416	>gi|22726201|ref|NP_689416.1| inositol polyphosphate multikinase [Homo sapiens]
23691	279	61	Q2_P18534	NO	C800767.1	SJCHGC01895 protein [Schistosoma japonicum] ||similar to GenBank Accession Number AB062685 ribosome-associated protein P40 in Bombyx mori [Schistosoma japonicum] ||Ag5 precursor [Echinococcus granulosus] ||GA10477-PA [Drosophila pseudoobscura] ||PREDICTED: similar to ENSANGP00000017112 [Apis mellifera] ||	GCTGCACAAATTGATCATCGTGTTACTGTTGCTATACTTCATCCAAATTATCATAGGAAA	0	C800767.1	Smp_002150			Plus / Plus	Plus / Plus	Sense	CAZ27915.1	subfamily S1A unassigned peptidase (S01 family) [Schistosoma mansoni]	5.2e-29	NP_254275	>gi|15559207|ref|NP_254275.1| elastase 2A preproprotein [Homo sapiens]	Q2_P32246,Q2_P30071,Q2_P18534
37568	442	83	Q2_P18535	NO	C800768.1	none	TTTCACCTCCAGTTTTCATGGAGTTGTGCAATCGATGTCCTAAAGTCACAGTTTCAGAAA	0	C800768.1	Smp_037190			Plus / Plus	Plus / Plus	Sense	CAZ31306.1	arf-related protein 1, arfrp1 [Schistosoma mansoni]	1.3e-47	NP_003215	>gi|4507449|ref|NP_003215.1| ADP-ribosylation factor related protein 1 isoform a [Homo sapiens]	Q2_P18535,Q2_P00242,Q2_P08432,Q2_P25435,Q2_P07706,Q2_P27245,Q2_P28142
20269	239	39	Q2_P18536	NO	C800769.1	SJCHGC06725 protein [Schistosoma japonicum] ||hypothetical protein LOC496664 [Xenopus tropicalis] gb|AAH87792.1| Hypothetical LOC496664 [Xenopus tropicalis] ||Hematopoietic stem/progenitor cells 176 [Homo sapiens] gb|AAF00568.1| unknown [Homo sapiens] ref|NP_057293.1| hematopoietic stem/progenitor cells 176 [Homo sapiens] ||PREDICTED: similar to hypothetical protein 2-6 [Rattus norvegicus] ||PRED…	CTTCACATCGATTTGATCAATGTATTTCTTCACTTCTAGCTACAAATGCTAGTTCTGGTT	0	C800769.1	Smp_091740.1			Plus / Plus	Plus / Plus	Sense	CAZ36424.1	expressed protein [Schistosoma mansoni]	1.9e-28	NP_057293	>gi|7706429|ref|NP_057293.1| trafficking protein particle complex 2-like [Homo sapiens]	Q2_P18536,Q2_P00171
26102	308	7	Q2_P18537	NO	C800771.1	ENSANGP00000012260 [Anopheles gambiae str. PEST] ref|XP_320082.2| ENSANGP00000012260 [Anopheles gambiae str. PEST] ||GA20273-PA [Drosophila pseudoobscura] ||PREDICTED: similar to ENSANGP00000012260 partial [Apis mellifera] ||CG7337-PA [Drosophila melanogaster] gb|AAM50751.1| LD01189p [Drosophila melanogaster] ref|NP_608630.2| CG7337-PA [Drosophila melanogaster] ||LD47622p [Drosophila melanogaster…	GGGAGTCTACGGTACGTGTGATATAATGGTGATATTTTTAGCTTTTCTATTTGGTTATTG	0	C800771.1	Smp_147240			Plus / Plus	Plus / Plus	Sense	CAZ32229.1	wd40 protein, putative [Schistosoma mansoni]	2.4e-60	NP_055809	>gi|190684671|ref|NP_055809.2| mitogen-activated protein kinase binding protein 1 isoform a [Homo sapiens]	Q2_P14487,Q2_P01896,Q2_P34548,Q2_P35422,Q2_P18537,Q2_P08023,Q2_P31031,Q2_P11239,Q2_P31429,Q2_P11631,Q2_P31433,Q2_P11634,Q2_P36543,Q2_P16298,Q2_P22337,Q2_P03096,Q2_P14646
44279	521	79	Q2_P18539	NO	C800773.1	SJCHGC03481 protein [Schistosoma japonicum] ||hypothetical protein DDB0218472 [Dictyostelium discoideum] gb|EAL65803.1| hypothetical protein DDB0218472 [Dictyostelium discoideum] ||	GGATCTTCTATTGCTTTGAATCCAGGATTAACTCCATTTCCAGCTGATCTTAGCTCATTA	0	C800773.1	Smp_018570			Plus / Plus	Plus / Plus	Sense	CAZ29531.1	serine-rich repeat protein 2 , putative [Schistosoma mansoni]				Q2_P35155,Q2_P15235,Q2_P18539,Q2_P36953,Q2_P31283,Q2_P16649,Q2_P11491
3795	45	55	Q2_P00245	NO	C800774.1	SJCHGC03993 protein [Schistosoma japonicum] ||similar to GenBank Accession Number AK015888 EG:22E5 [Schistosoma japonicum] ||SJCHGC02197 protein [Schistosoma japonicum] ||CG4025-PA [Drosophila melanogaster] emb|CAA21131.1| EG:22E5.9 [Drosophila melanogaster] ref|NP_569979.1| CG4025-PA [Drosophila melanogaster] gb|AAM49982.1| LP10820p [Drosophila melanogaster] ||GA17883-PA [Drosophila pseudoobscur…	GCTTTCTCCCTCAACTTCAAATAATCAAATAATTGAAACTTCTAACCCCTACGTTATCAC	0	C800774.1	Smp_006730			Plus / Minus	Plus / Minus	Sense	CAZ28385.1	fasting-inducible integral membrane protein tm6p1-related [Schistosoma mansoni]	1e-20	NP_060840	>gi|110825978|ref|NP_060840.2| DNA-damage regulated autophagy modulator 1 [Homo sapiens]
39050	460	35	Q2_P18540	NO	C800775.1	SJCHGC04642 protein [Schistosoma japonicum] ||	CGCTTAGAGATAATTCTATTTTAGAACAGACGTTTGGTTACTGTCCAAACTTTCAAGATC	0	C800775.1	Smp_087870			Plus / Plus	Plus / Plus	Sense	CAZ36063.1	expressed protein [Schistosoma mansoni]				Q2_P18540,Q2_P11015,Q2_P30806
15401	182	16	Q2_P18541	NO	C800776.1	SJCHGC06698 protein [Schistosoma japonicum] ||PREDICTED: similar to ELOVL family member 7 elongation of long chain fatty acids [Canis familiaris] ||Similar to RIKEN cDNA 9130013K24 gene [Danio rerio] ref|NP_956169.1| hypothetical protein LOC334217 [Danio rerio] ||PREDICTED: similar to ELOVL family member 7 elongation of long chain fatty acids [Bos taurus] ||polyunsaturated fatty acid elongase [Xe…	GCACACACACAAATCCATACAAATGATTATACATCCATCTACATGTTTTTGTTACGAACG	0	C800776.1	Smp_010770.2			Plus / Plus	Plus / Plus	Sense	CAZ28764.1	elongation of fatty acids protein 1 [Schistosoma mansoni]	8.8e-74	NP_079206	>gi|157388947|ref|NP_079206.2| elongation of very long chain fatty acids-like 7 [Homo sapiens]
32217	380	2	Q2_P18544	NO	C800779.1	SJCHGC04733 protein [Schistosoma japonicum] ||hypothetical protein [Gallus gallus] ref|NP_001026022.1| similar to CAAX box protein TIMAP [Gallus gallus] ||CAAX box protein TIMAP [Bos taurus] ref|NP_777249.1| CAAX box protein TIMAP [Bos taurus] sp|Q95N27|PP16B_BOVIN Protein phosphatase 1 regulatory inhibitor subunit 16B (TGF-beta-inhibited membrane-associated protein) (bTIMAP) (CAAX box protein TI…	CTGGTGTAGATCCTAATAGTTTAGACGCAGATGGATGGACACCTTCTCATGTTGCTGCTT	0	C800779.1	Smp_174110			Plus / Plus	Plus / Plus	Sense	CAZ36628.1	protein phosphatase 1 regulatory inhibitor subunit 16a, putative [Schistosoma mansoni]	3.9e-60	NP_056383	>gi|28626517|ref|NP_056383.1| protein phosphatase 1 regulatory inhibitor subunit 16B [Homo sapiens]	Q2_P18544,Q2_P13061,Q2_P32908
20143	237	83	Q2_P18545	NO	C800780.1	putative secreted NADH-ubiquinone oxireductase [Ixodes scapularis] ||PREDICTED: similar to NADH-ubiquinone oxidoreductase 42 kDa subunit mitochondrial precursor (Complex I-42KD) (CI-42KD) [Apis mellifera] ||CG6343-PB isoform B [Drosophila melanogaster] gb|AAF55947.1| CG6343-PA isoform A [Drosophila melanogaster] ref|NP_732692.1| CG6343-PB isoform B [Drosophila melanogaster] ref|NP_524445.1| CG634…	GGTGTTATGCTACCCGTTTAAAACACTTTTGACTGAATGAATTTTCACCTTTTGTATGTG	0	C800780.1	Smp_031710			Plus / Plus	Plus / Plus	Sense	CAZ30836.1	NADH-ubiquinone oxidoreductase 42 kD subunit, putative [Schistosoma mansoni]	1.3e-22	NP_004535	>gi|4758768|ref|NP_004535.1| NADH dehydrogenase (ubiquinone) 1 alpha subcomplex, 10, 42kDa precursor [Homo sapiens]
37693	444	38	Q2_P18546	NO	C800781.1	SJCHGC09405 protein [Schistosoma japonicum] ||ENSANGP00000022805 [Anopheles gambiae str. PEST] ref|XP_321106.2| ENSANGP00000022805 [Anopheles gambiae str. PEST] ||SD01527p [Drosophila melanogaster] ||CG5269-PA [Drosophila melanogaster] ref|NP_524404.1| CG5269-PA [Drosophila melanogaster] gb|AAF61273.1| phosphatidylinositol transfer protein [Drosophila melanogaster] ||PREDICTED: similar to ENSANGP…	TACCAATAATGTGCGCCTACAAACTTGTCACATGTGAATTTAAATGGTGGGGTATTCAAG	0	C800781.1	Smp_137020			Plus / Plus	Plus / Plus	Sense	CAZ30417.1	phosphatidylinositol transfer protein [Schistosoma mansoni]	7.9e-83	NP_006215	>gi|5453908|ref|NP_006215.1| phosphatidylinositol transfer protein, alpha [Homo sapiens]	Q2_P18546
33536	395	46	Q2_P18547	NO	C800782.1	Chain B Refined Structure Of The Nicotinic Acetylcholine Receptor At 4a Resolution ||LOC495135 protein [Xenopus laevis] ||PREDICTED: similar to nicotinic acetylcholine receptor beta 2 subunit [Danio rerio] ||cholinergic receptor nicotinic beta polypeptide 2 (neuronal) [Homo sapiens] emb|CAI16184.1| cholinergic receptor nicotinic beta polypeptide 2 (neuronal) [Homo sapiens] emb|CAA69692.1| nicotin…	TAAACGATGTAATAGTGAGCCATACTCTGAACACCTTTACGTTAATAGACACATACATGA	0	C800782.1	Smp_012000			Plus / Plus	Plus / Plus	Sense	CAZ28894.1	acetylcholine receptor-related [Schistosoma mansoni]	1.3e-27	NP_000739	>gi|4502833|ref|NP_000739.1| neuronal nicotinic acetylcholine receptor beta 2 precursor [Homo sapiens]	Q2_P18547
22112	261	12	Q2_P18548	NO	C800784.1	Hypothetical protein CBG09003 [Caenorhabditis briggsae] ||Hypothetical protein B0336.3 [Caenorhabditis elegans] ref|NP_498234.1| B0336.3 [Caenorhabditis elegans] ||hypothetical protein B0336.3 - Caenorhabditis elegans ||	CGGCCTGTTGCTGGAAATAACAAAATTAATTCATATTCATGGATGAGTATGACTAATGAC	0	C800784.1	Smp_088550			Plus / Plus	Plus / Plus	Sense	CAZ36128.1	rrm/rnp domain, putative [Schistosoma mansoni]	6.1e-29	NP_071401	>gi|31652264|ref|NP_071401.3| RNA binding motif protein 26 [Homo sapiens]	Q2_P19250,Q2_P18548,Q2_P30419,Q2_P23409,Q2_P28855,Q2_P09126,Q2_P07107,Q2_P10639
19411	229	31	Q2_P18549	NO	C800785.1	ENSANGP00000022340 [Anopheles gambiae str. PEST] ref|XP_319106.2| ENSANGP00000022340 [Anopheles gambiae str. PEST] ||unnamed protein product [Tetraodon nigroviridis] ||PREDICTED: similar to Cullin-associated NEDD8-dissociated protein 2 (Cullin-associated and neddylation-dissociated protein 2) (p120 CAND2) (TBP-interacting protein TIP120B) (TBP-interacting protein of 120 kDa B) [Bos taurus] ||PRED…	GTTATTCAAGTATTGGAAACAATAATTCGACGTTGTCCTAGAGTGATTTCCCCTTCTCTT	0	C800785.1	Smp_170510			Plus / Plus	Plus / Plus	Sense	CAZ36152.1	tip120, putative [Schistosoma mansoni]	7e-21	NP_060918	>gi|21361794|ref|NP_060918.2| TIP120 protein [Homo sapiens]	Q2_P18549,Q2_P21226,Q2_P22015,Q2_P28416,Q2_P03703
4121	49	41	Q2_P18550	NO	C800786.1	PREDICTED: similar to Striatin-3 (Cell-cycle autoantigen SG2NA) (S/G2 antigen) [Strongylocentrotus purpuratus] ||GA20319-PA [Drosophila pseudoobscura] ||CG7392-PD isoform D [Drosophila melanogaster] gb|AAN10651.1| CG7392-PC isoform C [Drosophila melanogaster] gb|AAF52594.2| CG7392-PB isoform B [Drosophila melanogaster] gb|AAF52593.2| CG7392-PA isoform A [Drosophila melanogaster] ref|NP_723336.1| …	ATGGCCCGTTTGACTTCAGTTTGTCTAACAGTTCCAGTTTTGATTACTTGGCACTTACGG	0	C800786.1	Smp_141040			Plus / Plus	Plus / Plus	Sense	CAZ39169.1	striatin, putative [Schistosoma mansoni]	4e-101	NP_003153	>gi|51242945|ref|NP_003153.2| striatin, calmodulin binding protein [Homo sapiens]	Q2_P17107,Q2_P18550,Q2_P37467
23546	278	1	Q2_P18551	NO	C800787.1	SJCHGC04952 protein [Schistosoma japonicum] ||SJCHGC04659 protein [Schistosoma japonicum] ||	TTGTGAATCAATAGATGCAGAATCACAATCCATCCAAACTCCATGTCGTTTCTTAACAGT	0	C800787.1	Smp_080620			Plus / Plus	Plus / Plus	Sense	CAZ35403.1	expressed protein [Schistosoma mansoni]				Q2_P18551,Q2_P01584
29776	351	26	Q2_P18552	NO	C800788.1	endoplasmin [Schistosoma mansoni] ||SJCHGC06677 protein [Schistosoma japonicum] ||PREDICTED: similar to chaperone protein GP96 isoform 3 [Danio rerio] ||Tumor rejection antigen (gp96) 1 [Danio rerio] gb|AAP47138.1| chaperone protein GP96 [Danio rerio] ref|NP_937853.1| tumor rejection antigen (gp96) 1 [Danio rerio] ||tumor rejection antigen (gp96) 1 [Gallus gallus] sp|P08110|ENPL_CHICK Endoplasmin…	CATGTGACTTGCATGTTTTCTTGAAGACGTAGGAATCGTTTGTTTTTCATCTCGTTTTAA	0	C800788.1	Smp_030300.4			Plus / Plus	Plus / Plus	Sense	CAZ30707.1	endoplasmin, putative [Schistosoma mansoni]	0.0	NP_003290	>gi|4507677|ref|NP_003290.1| heat shock protein 90kDa beta, member 1 [Homo sapiens]	Q2_P33535,Q2_P02862,Q2_P01518,Q2_P18552,Q2_P34413,Q2_P30214,Q2_P10440,Q2_P26223,Q2_P40720,Q2_P27003,Q2_P16738,Q2_P04297,Q2_P26116,Q2_P07051,Q2_P26689,Q2_P30665,Q2_P07169,Q2_P26820,Q2_P36870,Q2_P16573,Q2_P13664
17451	206	26	Q2_P18554	NO	C800790.1	PREDICTED: similar to Probable ATP-dependent RNA helicase p54 (Oncogene RCK) (DEAD-box protein 6) isoform 1 [Danio rerio] ||RNA helicase p47 [Spisula solidissima] ||DEAD (Asp-Glu-Ala-Asp) box polypeptide 6 [Mus musculus] dbj|BAC35670.1| unnamed protein product [Mus musculus] ||unnamed protein product [Tetraodon nigroviridis] ||DDX6 protein [Homo sapiens] ||	CCCCATATTCTGTATGTGGTCAGTGTTGCCCTCATTCGCTTGCTCTTGGCTGTTGTTATT	0	C800790.1	Smp_173970			Plus / Plus	Plus / Plus	Sense	CAZ36617.1	DEAD box ATP-dependent RNA helicase, putative [Schistosoma mansoni]	1e-160	NP_004388	>gi|164664518|ref|NP_004388.2| DEAD (Asp-Glu-Ala-Asp) box polypeptide 6 [Homo sapiens]
26944	317	84	Q2_P18555	NO	C800791.1	SJCHGC04262 protein [Schistosoma japonicum] ||phosphoglucomutase 2 [Homo sapiens] gb|AAQ13508.1| MSTP006 [Homo sapiens] ||Phosphoglucomutase 2 [Homo sapiens] emb|CAG33555.1| PGM2 [Homo sapiens] sp|Q96G03|PGM2_HUMAN Phosphoglucomutase 2 (Glucose phosphomutase 2) (PGM 2) ||hypothetical protein [Homo sapiens] ||phosphoglucomutase 2 variant [Homo sapiens] ||	AGCTTGGAACCTTTGGAAACTTCATGGAACATAGATAATGTCGAGGCGAATCCTCTCTGT	0	C800791.1	Smp_085150			Plus / Plus	Plus / Plus	Sense	CAZ35857.1	phosphoglucomutase, putative [Schistosoma mansoni]	3e-160	NP_060760	>gi|63055049|ref|NP_060760.2| phosphoglucomutase 2 [Homo sapiens]	Q2_P18555,Q2_P06464,Q2_P26040
24293	286	68	Q2_P18556	NO	C800792.1	none	AATGGCTTAGTTGAACAATTGGATCGCCTGGAACTCGAAGCAGATATTACTTTTCCTCAT	0	C800792.1	Smp_149610			Plus / Plus	Plus / Plus	Sense	CAZ32677.1	hypothetical protein [Schistosoma mansoni]
40357	475	67	Q2_P00250	NO	C800793.1	CG5394-PA isoform A [Drosophila melanogaster] ref|NP_524471.2| CG5394-PA isoform A [Drosophila melanogaster] gb|AAL13932.1| LD42739p [Drosophila melanogaster] sp|P28668|SYEP_DROME Bifunctional aminoacyl-tRNA synthetase [Includes: Glutamyl-tRNA synthetase (Glutamate--tRNA ligase) Prolyl-tRNA synthetase (Proline--tRNA ligase)] ||CG5394-PB isoform B [Drosophila melanogaster] ref|NP_732925.1| CG5394-…	CGCTTGTGATTTTAATCCAACATTGGTTTGTGGTAGTCCCGCTCCTGATACACCATGTTT	0	C800793.1	Smp_138930.2			Plus / Minus	Plus / Minus	Sense	CAZ30778.1	glutamyl-tRNA synthetase, cytoplasmic (glutamate--tRNA ligase) (glurs), putative [Schistosoma mansoni]	3e-180	NP_004437	>gi|62241042|ref|NP_004437.2| glutamyl-prolyl tRNA synthetase [Homo sapiens]	Q2_P00250,Q2_P32947,Q2_P13100,Q2_P23498,Q2_P23495,Q2_P04097,Q2_P29991
26695	315	5	Q2_P18558	NO	C800795.1	unknown [Schistosoma japonicum] ||SJCHGC00665 protein [Schistosoma japonicum] ||unknown [Schistosoma japonicum] ||hypothetical protein [Schistosoma japonicum] ||troponin T [Mizuhopecten yessoensis] ||	CCGTCTTACTGATATCATTGATAGTATGTTATCATTCACTCCCTCTTCTTATGTTTCTTC	0	C800795.1	Smp_179810			Plus / Plus	Plus / Plus	Sense	CAY18041.1	troponin t, invertebrate, putative [Schistosoma mansoni]
10610	125	70	Q2_P18559	NO	C800796.1	Hypothetical protein CBG19860 [Caenorhabditis briggsae] ||Hypothetical protein C31H1.6b [Caenorhabditis elegans] ref|NP_872099.1| C31H1.6b [Caenorhabditis elegans] ||Hypothetical protein C31H1.6a [Caenorhabditis elegans] ref|NP_500866.2| C31H1.6a [Caenorhabditis elegans] ||Hypothetical protein B0001.1 [Caenorhabditis elegans] ref|NP_502303.2| B0001.1 [Caenorhabditis elegans] ||Hypothetical protei…	CTTGGGGTGTAGATACACGTATCACAGTACCACCGAGACATTCTGCTTCTGCTGAAGTAA	0	C800796.1	Smp_074190			Plus / Plus	Plus / Plus	Sense	CAZ34829.1	expressed protein [Schistosoma mansoni]				Q2_P18559
17839	210	74	Q2_P18561	NO	C800798.1	similar to XM_044547 protein associated with PRK1 in Homo sapiens [Schistosoma japonicum] ||PREDICTED: similar to CG33188-PA isoform A [Strongylocentrotus purpuratus] ||putative zinc finger protein ZmZf [Zea mays] ||PREDICTED OJ1225_F07.15 gene product [Oryza sativa (japonica cultivar-group)] ref|XP_464458.1| putative zinc-finger protein [Oryza sativa (japonica cultivar-group)] dbj|BAD25251.1| pu…	TGCCGGGTTTAAGACCCACTTGTAACTGTATGTTTACAGGATTTCAGTACCATTACCTAT	0	C800798.1	Smp_105210			Plus / Plus	Plus / Plus	Sense	CAY18133.1	zinc finger protein, putative [Schistosoma mansoni]	8.6e-28	NP_061879	>gi|21359918|ref|NP_061879.2| zinc finger, AN1-type domain 6 [Homo sapiens]
41241	486	16	Q2_P18564	NO	C800802.1	SJCHGC02842 protein [Schistosoma japonicum] ||	GTATTACAATAGAATAACAAGGGTTCTGTAGAGGTATCTCTTGTCTGAATACGTTTGTTG	0	C800802.1	Smp_105220			Plus / Plus	Plus / Plus	Sense	CAY18136.1	expressed protein [Schistosoma mansoni]
40455	476	80	Q2_P18565	NO	C800803.1	none	CCGAAGAAGAGTTTGAACCTACAGCTTTAATAACTGACTTCAATGATTTCACTGAAGTAT	0	C800803.1	Smp_070020			Plus / Plus	Plus / Plus	Sense	CAZ34449.1	rhoptry associated membrane antigen, putative [Schistosoma mansoni]				Q2_P00255,Q2_P06658,Q2_P25826,Q2_P18565
1598	19	68	Q2_P00256	NO	C800804.1	SJCHGC00725 protein [Schistosoma japonicum] ||	CGATTGGAATTACATTAAGTTAGATTGTAGAGTGGAGGATGAAAAAGATGATGGTGAGAA	0	C800804.1	Smp_056990			Plus / Minus	Plus / Minus	Sense	CAZ33236.1	expressed protein [Schistosoma mansoni]				Q2_P19583,Q2_P00256
4007	48	12	Q2_P18566	NO	C800805.1	SJCHGC06242 protein [Schistosoma japonicum] ||	CGTATAAGTACTTCAATAAAGCCGAAATCAACCTTTTGTTTTCGCTATGAACCAGATTGT	0	C800805.1	Smp_074450			Plus / Plus	Plus / Plus	Sense	CAZ34856.1	expressed protein [Schistosoma mansoni]				Q2_P18407,Q2_P18566,Q2_P00189
10712	127	2	Q2_P00257	NO	C800807.1	SJCHGC05742 protein [Schistosoma japonicum] ||unnamed protein product [Tetraodon nigroviridis] ||Hypothetical protein LOC606661 [Danio rerio] ref|NP_001028269.1| hypothetical protein LOC606661 [Danio rerio] ||PREDICTED: similar to Placenta-specific gene 8 protein (C15 protein) (BM-004) [Gallus gallus] ||unnamed protein product [Tetraodon nigroviridis] ||	GCAAATTCTATGAACCATCCCATTATGTTTGAAACAGTTTTCATTCATTTCACTGGCTCT	0	C800807.1	Smp_101970			Plus / Minus	Plus / Minus	Sense	CAZ37246.1	Placenta-specificprotein 8 protein (C15 protein) (Onzin), putative [Schistosoma mansoni]
4421	53	1	Q2_P18567	NO	C800808.1	hypothetical protein [Schistosoma japonicum] ||SJCHGC03377 protein [Schistosoma japonicum] ||	CTGAAGAATCTGGTCAACGTACGAGGGAAGAAATAGATAAAATAGAAAAGAAAGCTAATG	0	C800808.1	Smp_000090			Plus / Plus	Plus / Plus	Sense	CAZ27687.1	hypothetical protein [Schistosoma mansoni]				Q2_P18567
28627	337	67	Q2_P18568	NO	C800809.1	SJCHGC09317 protein [Schistosoma japonicum] ||LOC394927 protein [Xenopus tropicalis] ||PREDICTED: similar to Tu translation elongation factor mitochondrial [Strongylocentrotus purpuratus] ||unnamed protein product [Tetraodon nigroviridis] ||hypothetical protein LOC541378 [Danio rerio] gb|AAH91659.1| Zgc:110766 [Danio rerio] ||	GTCCAGGTCCATTCAACTGGTCTAAATAATGCCCGGTTATATTTGTAATTATTTTCAACT	0	C800809.1	Smp_073500.1			Plus / Plus	Plus / Plus	Sense	CAZ34763.1	elongation factor tu (ef-tu), putative [Schistosoma mansoni]	3e-127	NP_003312	>gi|34147630|ref|NP_003312.3| Tu translation elongation factor, mitochondrial precursor [Homo sapiens]	Q2_P18568
33819	398	74	Q2_P18569	NO	C800811.1	SJCHGC04754 protein [Schistosoma japonicum] ||histidine decarboxylase [Aplysia californica] ||Hypothetical protein CBG00668 [Caenorhabditis briggsae] ||PREDICTED: similar to Aromatic-L-amino-acid decarboxylase (AADC) (DOPA decarboxylase) (DDC) [Gallus gallus] ||Hypothetical protein K01C8.3a [Caenorhabditis elegans] ref|NP_495744.1| Tyrosin DeCarboxylase family member (tdc-1) [Caenorhabditis elega…	CGTCATTTACCAGTCGATGAAAACTTTAGTATTCAAGGTGAAACTTTACAACGTGCTATT	0	C800811.1	Smp_135230			Plus / Plus	Plus / Plus	Sense	CAZ30088.1	aromatic-L-amino-acid decarboxylase; phenylalanine decarboxylase [Schistosoma mansoni]	2e-111	NP_000781	>gi|4503281|ref|NP_000781.1| dopa decarboxylase (aromatic L-amino acid decarboxylase) [Homo sapiens]	Q2_P18569,Q2_P06218,Q2_P25775
17972	212	37	Q2_P18570	NO	C800812.1	hypothetical protein LOC321938 [Danio rerio] gb|AAS87372.1| cytohesin 1-like protein [Danio rerio] ||unnamed protein product [Tetraodon nigroviridis] ||unknown [Homo sapiens] ||pleckstrin homology Sec7 and coiled/coil domains 3 [Homo sapiens] emb|CAA11686.1| ARNO3 [Homo sapiens] emb|CAA06434.1| GRP1 protein [Homo sapiens] gb|AAH28717.1| PSCD3 protein [Homo sapiens] gb|EAL23717.1| pleckstrin homol…	TTTTAACGAGTTTCTCTGAACGCTATGTAGAGCAAAATCCTTCAGTATTTAACTCGCCAC	0	C800812.1	Smp_143390			Plus / Plus	Plus / Plus	Sense	CAZ31508.1	guanyl-nucleotide exchange factor, putative [Schistosoma mansoni]	2.3e-79	NP_059430	>gi|110349763|ref|NP_059430.2| cytohesin 1 isoform 2 [Homo sapiens]	Q2_P18570,Q2_P33286,Q2_P13437,Q2_P24853,Q2_P14055,Q2_P17662,Q2_P05134,Q2_P33935
31506	371	56	Q2_P18571	NO	C800813.1	SJCHGC06310 protein [Schistosoma japonicum] ||SJCHGC08973 protein [Schistosoma japonicum] ||similar to GenBank Accession Number AK017557 SCP-like extracellular protein [Schistosoma japonicum] ||PREDICTED: similar to chromosome 9 open reading frame 19 [Strongylocentrotus purpuratus] ||PREDICTED: similar to Wu:fd05a10 protein [Danio rerio] ||	GCTATTTGGTATTCCGAATTATGGTTTCCCCTTTCTACTTTCGACAATTTCAATTCATAG	0	C800813.1	Smp_124050.4			Plus / Plus	Plus / Plus	Sense	CAZ28043.1	venom allergen-like (VAL) 6 protein [Schistosoma mansoni]
[truncated: 42,742 more rows]
